# Supplementary material
Source: Frontiers journal article supplement (https://www.frontiersin.org/articles/151438)
Supplement: Table_2.XLS [file Table_2.XLS]

## Sheet: Identified proteins
Accessiona	Score	Mass	Cov	Peptide	Unique Peptide	Identity	E_Value	Accessionb	Protein	Species	Fold change(113/115)d	Sigc	Fold change(114/116)e	Sigc	Mean ratio f	Sigc
					Photosynthesis (47)
					Rubisco related (5)
cotton_GLEAN_10010533	340	80528	24.4	10	7	94.9	0	gi|356525839	ruBisCO large subunit-binding protein subunit beta, chloroplastic-like	Glycine max	0.925926		1.01523		1.02354
Garb_30135	307	59571	22.3	8	8	92.71	0	gi|91208910	ribulose-1,5-bisphosphate carboxylase/oxygenase large subunit	Gossypium hirsutum	1.37174	*	1.12613		1.23609
cotton_GLEAN_10022407	284	74274	21	9	1	91.52	0	gi|134101	RuBisCO large subunit-binding protein subunit alpha;	Gossypium hirsutum	---		---		---
Garb_29096	189	81732	9.5	4	1	89.79	0	gi|225442531	ruBisCO large subunit-binding protein subunit beta, chloroplastic	Vitis vinifera	---		---		---
Garb_13949	138	61744	8.9	3	3	100	4e-38	gi|22255887	rubisco activase alpha	Gossypium hirsutum	1.19048		1.03734		1.17233
					LHC (1)
Garb_17336	30	32025	6.9	1	1	85.33	2e-119	gi|115833	Chlorophyll a-b binding protein CP24 10A, chloroplastic	Gossypium hirsutum	---		---		---
					Photosystem I (7)
Garb_12472	113	29839	27.6	3	2	99.31	9e-81	gi|225437028	PREDICTED: photosystem I reaction center subunit II, chloroplastic	Vitis vinifera	0.940734		1.2987		1.20627
cotton_GLEAN_10028167	104	27952	21.2	2	1	96.55	3e-50	gi|:68565661	Photosystem I reaction center subunit II	Populus euphratica	1.27065	*	1.5361	*	1.36426	*
Garb_09736	83	19098	13.8	1	1	91.43	8e-12	gi|600628	photosystem I subunit PSI-E	Arabidopsis thaliana	0.990099		1.4245		1.2285
Garb_37366	40	27985	5.6	1	1	98.7	5e-130	gi|226358409	chloroplast chlorophyll A-B binding protein	Gossypium hirsutum	---		---		---
Garb_39193	36	26914	6.8	1	1	92.96	1e-26	gi|330318804	photosystem I reaction center subunit XI	Camellia sinensis	---		---		---
Garb_00661	35	105035	2.5	2	2	96.08	0	gi|91208901	photosystem I P700 apoprotein A2	Gossypium hirsutum	0.897666		1.40252		1.09769
Garb_23944	29	11108	7.4	1	1	100	1e-25	gi|297790820	psi 9 kDa protein	Arabidopsis lyrata subsp. lyrata	---		---		---
					Photosystem II (12)
cotton_GLEAN_10025009	446	44126	33.7	8	8	96.77	2e-10	gi|32363253	Oxygen-evolving enhancer protein 1, chloroplastic	Brassica rapa	1.22699		1.30719	*	1.26582	*
Garb_16977	144	23546	8.8	1	1	66.06	7e-37	gi|6093825	Photosystem II reaction center psb28 protein	Guillardia theta	0.919118		1.36426		1.09409
Garb_19838	109	30263	20.4	3	3	88.33	8e-94	gi|11134035	Oxygen-evolving enhancer protein 2, chloroplastic	Arabidopsis thaliana	1.36799	*	1.0627		1.17233	*
Garb_31840	85	9946	31.5	2	2	100	2e-18	gi|75275913	Photosystem II D2 protein	Amborella trichopoda	0.759878	*	0.957854		0.807754	*
Garb_19550	79	49898	8	2	2	93.87	2e-171	gi|255559812	Photosystem II stability/assembly factor HCF136, chloroplast precursor, putative	Lotus japonicus	0.519751		1.17233		0.884956
Garb_25102	70	38905	9.4	2	2	97.11	1e-156	gi|91208927	photosystem II 47 kDa protein	Gossypium hirsutum	0.556174		1.02041		0.796178
Garb_02619	61	56253	3	1	1	100	0	gi|91208898	photosystem II 44 kDa protein	Gossypium hirsutum	1.27877		1.26103	*	1.26904
Garb_42471	46	39568	3.1	1	1	96.03	0	gi|290488432	photosystem II protein D1	Nerium oleander	1.51976		1.85185		1.65017
Garb_09528	40	10771	13.3	1	1	89.16	2e-35	gi|11497544	photosystem II protein V	Nerium oleander	---		---		---
Garb_21255	36	18941	7.3	1	1	99.33	2e-81	gi|313183848	photosystem II CP47 chlorophyll apoprotein	Prunus persica	---		---		---
Garb_02620	33	32117	6.4	1	1	100	5e-154	gi|13518433	photosystem II protein D2	Lotus japonicus	0.931966		1.48588		1.19048
Garb_18753	30	17939	5.8	1	1	98.33	1e-27	gi|155733519	photosystem II 10 kDa polypeptide	Olea europaea	---		---		---
					Cytochrome related(14)
cotton_GLEAN_10027379	271	19149	18.7	2	1	82.09	4e-61	gi|729252	Cytochrome b5	Brassica oleracea var. botrytis	1.51286	*	1.47493	*	1.5015	*
Garb_07908	186	30175	6.4	1	1	83.1	2e-29	gi|75207492	Cytochrome c oxidase subunit 5b-2	Arabidopsis thaliana	1.27226		0.529	*	0.898
cotton_GLEAN_10021554	179	19309	28.3	3	1	69.23	4e-34	gi|343173048	cytochrome b5, partial	Silene latifolia	1.2285		1.45985	*	1.3986	*
Garb_08535	172	35059	10	2	1	96.23	1e-25	gi|146454604	cytochrome c oxidase subunit	Sonneratia apetala	0.660066		0.744602		0.791766
Garb_24184	133	24729	34.4	5	1	100	3e-99	gi|124488472	benzoquinone reductase	Gossypium hirsutum	0.723589	*	0.763942		0.78125
cotton_GLEAN_10013772	113	22744	15.8	2	1	96.23	1e-26	gi|146454600	cytochrome c oxidase subunit	Sonneratia apetala	0.782473		1.02564		0.921659
cotton_GLEAN_10039091	94	67426	11.4	4	4	67.19	5e-19	gi|357490769	Cytochrome P450	Medicago truncatula	0.738007		0.707214		0.674764
cotton_GLEAN_10009348	90	16509	20.5	2	2	94.59	3e-58	gi|117988	Cytochrome c	Gossypium barbadense	1.34228		1.50602	*	1.40845
Garb_33921	49	19294	9.7	1	1	80.6	2e-53	gi|50844679	cytochrome b5 isoform Cb5-D	Vernicia fordii	---		---		---
Garb_32065	47	36894	7.2	1	1	98.25	3e-62	gi|231924	Cytochrome c1-2, heme protein, mitochondrial	Solanum tuberosum	---		---		---
Garb_31066	43	20213	11.6	1	1	66	9e-14	gi|688005	cytochrome b5 homolog	Brassica napus	---		---		---
Garb_28862	42	137489	1.1	1	1	61.73	1e-171	gi|225458446	cytochrome P450 82A3-like	Vitis vinifera	---		---		---
Garb_25822	30	18373	14.1	1	1	86.02	1e-35	gi|19853	cytochrome b5 homolog	Nicotiana tabacum	---		---		---
Garb_36715	25	43640	2.5	1	1	88.54	2e-162	gi|91208915	cytochrome f	Gossypium hirsutum	---		---		---
					Others (8)
Garb_01352	217	67306	19.9	7	4	63.2	1e-140	gi|255578043	Reticuline oxidase precursor, putative	Ricinus communis	0.960615		0.938967		0.845309
cotton_GLEAN_10014082	168	55414	16.1	6	1	55.56	8e-132	gi|356528090	reticuline oxidase-like protein-like	Glycine max	---		---		---
cotton_GLEAN_10030481	160	67744	11.5	5	1	71.26	0	gi|356555938	reticuline oxidase-like protein-like	Glycine max	---		---		---
Garb_25254	143	20991	28.1	3	3	86.87	1e-45	gi|130283	Plastocyanin	Solanum crispum	0.825083		0.966184		0.888889
cotton_GLEAN_10038555	81	71659	6	3	2	60.08	1e-169	gi|358348153	Reticuline oxidase	Medicago truncatula	1.20192		1.07875		1.12867
Garb_14312	62	46790	7.4	2	2	99.46	0	gi|366984550	glycolate oxidase	Gossypium hirsutum	1.11111		1.56986		1.3947
Garb_07465	46	31933	6.3	1	1	84.31	2e-66	gi|340707640	Chain A, The 1.7 Angstrom Resolution Crystal Structure	Arabidopsis Thaliana	---		---		---
Garb_05617	40	47650	5.7	2	2	99.05	1e-173	gi|73761689	ACC oxidase 3	Gossypium hirsutum	1.30208		1.8315		1.67785
					Carbohydrate and energy metabolism(197)
					TCA AND RESPIRATION related (80)
Garb_28798	1545	44125	46.2	9	4	92.77	5e-37	gi|126896	Malate dehydrogenase, mitochondrial	Citrullus lanatus	0.944287		0.97371		1.04167
cotton_GLEAN_10009583	1373	60910	33.6	10	2	94.17	0	gi|158144895	enolase	Gossypium hirsutum	0.507614		0.894454		0.794281
cotton_GLEAN_10026304	1020	43944	24.2	5	1	90.74	9e-80	gi|356600123	mitochondrial malate dehydrogenase	Citrus sinensis	1.0352		0.918274		0.971817
Garb_26457	908	41210	44.2	8	3	100	6e-161	gi|211906518	glyceraldehyde-3-phosphate dehydrogenase C subunit	Gossypium hirsutum	0.278707	*	1.07643		0.679348	*
Garb_01661	832	60524	38.5	11	4	94.61	0	gi|225455555	enolase	Glycine max	0.564016		0.838926		0.678887	*
Garb_26291	757	54767	33.2	9	2	100	0	gi|211906450	phosphoglycerate kinase	Gossypium hirsutum	0.835422		0.775194	*	0.785546
Garb_13664	519	42292	28.9	8	2	99.7	0	gi|211906490	malate dehydrogenase	Gossypium hirsutum	0.739645		0.615764	*	0.66357	*
cotton_GLEAN_10011000	474	44003	28.4	7	1	87.89	7e-155	gi|38016531	fiber quinone-oxidoreductase, partial	Gossypium barbadense	0.884173		0.59952		0.716332
Garb_24151	434	24258	33.3	4	2	100	3e-14	gi|29836555	putative quinone oxidoreductase	Gossypium herbaceum	0.97371		0.921659		0.956023
Garb_31687	426	42272	28.9	8	2	98.57	1e-31	gi|12651642	putative. similar to cytoplasmic malate dehydrogenases	Zea mays	0.776398	*	0.68918		0.726744
cotton_GLEAN_10018997	425	41670	33.5	9	1	90.42	2e-177	gi|1709454	Pyruvate dehydrogenase E1 component subunit beta, mitochondrial	Pisum sativum	---		---		---
Garb_14900	418	45005	31.2	9	1	90.48	6e-179	gi|170945	Pyruvate dehydrogenase E1 component subunit beta, mitochondrial OS=Pisum sativum PE=2 SV=1	Pisum sativum	---		---		---
Garb_00239	372	71824	14.3	8	2	88.89	2e-159	gi|209917124	2,3-bisphosphoglycerate-independent phosphoglycerate mutase	Vitis amurensis	1.20919		0.648088		0.864304
Garb_04392	350	44583	24.8	5	4	92.06	1e-26	gi|254914193	putative malate dehydrogenase	Lemna minor	0.978474		1.73611	*	1.30548
cotton_GLEAN_10020916	338	105056	17.6	10	2	100	0	gi|195984445	phospholipase D alpha	Gossypium hirsutum	0.503271		0.823723		0.650618
Garb_22268	333	58304	22.1	8	8	99.76	0	gi|211906502	Isocitrate dehydrogenase	Gossypium hirsutum	1.10988		0.73692		0.791766
Garb_19701	333	45133	25.9	7	2	89.29	5e-180	gi|21431823	Pyruvate dehydrogenase E1 component subunit beta, mitochondrial	Pisum sativum	0.820345		1.02145		0.970874
Garb_15640	309	43325	11.3	3	2	92.86	2e-85	gi|290796674	peroxisomal NAD malate dehydrogenase-like protein	Dimocarpus longa	0.864304		1.35501		1.1534
cotton_GLEAN_10024924	307	57405	20.2	7	1	88.04	0	gi|21264030	Succinyl-CoA ligase [ADP-forming] subunit beta, mitochondrial	Arabidopsis thaliana	0.517866	*	0.93633		0.724113	*
cotton_GLEAN_10024926	297	57802	14.5	5	1	93.81	1e-55	gi|343173143	succinyl-CoA ligase	Silene latifolia	1.45138		1.0846		1.21359
Garb_10278	290	41860	20.5	4	1	99.66	2e-162	gi|211906470	glyceraldehyde-3-phosphate dehydrogenase	Gossypium hirsutum	0.777605		1.44092		1.05597
Garb_26411	285	48206	17.4	4	1	92.72	2e-130	gi|149391151	glyceraldehyde-3-phosphate dehydrogenase	Oryza sativa Indica Group	---		1.45138		0.527704
Garb_15376	278	72227	16.3	6	6	98.05	0	gi|211906508	pyruvate decarboxylase	Gossypium hirsutum	1.16009		1.002		1.10865
Garb_01273	252	44924	24.3	7	3	90	2e-25	gi|301323227	pyruvate dehydrogenase E1-beta subunit	Dimocarpus longan	0.754148	*	1.24533		0.978474
Garb_29512	241	52732	25.7	7	1	76.43	1e-157	gi|75313643	Malate dehydrogenase, chloroplastic	Arabidopsis thaliana	0.395101		0.848176		0.643915
Garb_27943	240	41729	25.9	6	4	93.9	9e-180	gi|211906444	fructokinase	Gossypium hirsutum	0.816993		0.884173		0.873362
Garb_29464	225	57703	15.9	6	1	87.44	0	gi|75147005	Succinyl-CoA ligase [ADP-forming] subunit beta, mitochondrial	Solanum lycopersicum	0.909918		0.913242		0.921659
Garb_30023	223	75539	10.3	5	3	89.58	6e-16	gi|67460977	Putative quinone-oxidoreductase homolog, chloroplastic	Arabidopsis thaliana	1.45985		1.17786		1.2987
cotton_GLEAN_10019333	205	65519	19.6	6	2	97.1	4e-33	gi|380863120	NADPH-producing dehydrogenase, partial	Dimocarpus longa	---		---		---
cotton_GLEAN_10015821	200	42347	30.8	7	2	97.82	1e-154	gi|211906456	quinone oxidoreductase	Gossypium hirsutum	0.88968		0.944287		0.934579
Garb_33770	185	64999	17.9	5	3	96.52	2e-59	gi|339265919	phosphogluconate dehydrogenase	Lotus grandiflorus	1.618	*	1.424		1.521	*
Garb_00955	160	70573	8.3	3	2	91.07	3e-147	gi|356532527	dihydrolipoyl dehydrogenase-like	Glycine max	0.421053		0.754148		0.502513	*
Garb_09744	147	53750	10.9	4	2	83.17	0	gi|20141281	Alcohol dehydrogenase class-3	Arabidopsis thaliana	0.772201		0.948767		0.851789
cotton_GLEAN_10018276	140	81885	11.3	4	4	75	2e-25	gi|356533891	dihydrolipoyllysine-residue acetyltransferase component 1 of pyruvate dehydrogenase complex, mitochondrial-like	Glycine max	0.696379		1.13122		1.03734
Garb_13396	135	75961	15.2	6	3	98.35	0	gi|211906486	phosphoglycerate dehydrogenase	Gossypium hirsutum	0.381679		0.940734		0.878735
Garb_38455	131	70837	6.5	2	1	89.86	4e-29	gi|15637163	phosphoglucomutase	Beta vulgari	0.481464		1.10497		0.75188
Garb_06105	130	54988	5	2	2	92.31	9e-142	gi|75294330	Probable succinyl-CoA ligase [ADP-forming] subunit alpha, mitochondrial	Oryza sativa subsp. japonica	0.813008		1.14416		0.995025
cotton_GLEAN_10020265	128	57817	14.3	5	2	56.67	2e-11	gi|129060	Dihydrolipoyllysine-residue acetyltransferase component of pyruvate dehydrogenase complex, mitochondrial OS=Saccharomyces cerevisiae (strain ATCC 204508 / S288c)	Saccharomyces cerevisiae	0.728863		1.04493		0.893655
Garb_05083	121	77088	11	5	5	92.17	0	gi|356518402	glucose-6-phosphate isomerase-like	Glycine ma	1.70068		1.00806		1.26422
cotton_GLEAN_10039992	120	41565	14.5	4	3	85.85	1e-157	gi|12644431	Thioredoxin reductase 2	Arabidopsis thaliana	0.376223		0.96432		0.677966
Garb_16983	118	52495	11.7	3	1	89.69	0	gi|325910821	glutathione-dependent formaldehyde dehydrogenase	Epipremnum aureum	---		---		---
cotton_GLEAN_10022222	107	40875	8.5	2	2	93.79	1e-167	gi|255537671	6-phosphogluconate dehydrogenase, putative	Ricinus communis	0.792		0.66	*	0.726	*
Garb_09179	117	70291	9.1	3	3	96.48	3e-76	gi|4586602	pyruvate kinase	Cicer arietinum	0.573		1.328		0.847	*
Garb_21160	62	50722	5.6	2	2	93.24	3e-78	gi|75268018	Probable fructose-bisphosphate aldolase 3, chloroplastic	Solanum palustre	2.439		1.047		1.485	*
Garb_02390	116	62461	10.5	4	1	51.28	2e-14	gi|117940179	Dihydrolipoyllysine-residue acetyltransferase component 1 of pyruvate dehydrogenase complex, mitochondrial	Arabidopsis thaliana	1.20482		2.13675		1.62602
cotton_GLEAN_10034898	111	62043	17.2	6	6	92.56	0	gi|356519186	enolase 1, chloroplastic-like	Glycine max	0.482625		1.11111		0.77821
cotton_GLEAN_10003689	109	52633	7.5	2	2	90.27	2e-170	gi|6016081	Glyceraldehyde-3-phosphate dehydrogenase	Vitis vinifera	0.529942		1.27226		1.08696
cotton_GLEAN_10026222	106	63010	12.8	5	2	98.67	7e-39	gi|95116519	pyruvate dehydrogenase E1 component alpha subunit	Theobroma cacao	1.25628		1.04822		1.12486
Garb_02944	104	44534	9.7	2	1	98.43	2e-67	gi|356600109	NAD-dependent isocitrate dehydrogenase	Citrus sinensis	0.981354		0.844595		0.907441
Garb_05914	84	44061	10.5	3	3	75.29	5e-153	gi|288310302	branched chain amino acid transaminase	Cucumis melo	0.859107		0.844595		0.878735	*
Garb_27590	75	89817	6.6	3	3	97.85	1e-48	gi|37193998	phosphoenolpyruvate carboxykinase, partial	Mitella japonica	0.317965		0.613874		0.465983
Garb_06074	72	67814	6.3	2	1	95.24	7e-151	gi|356600119	pyruvate kinase	Citrus sinensis	---		---		---
Garb_17140	69	64784	5.7	2	1	91.31	0	gi|255564804	pyruvate kinase, putativ	Ricinus communis	0.91659		0.968992		0.931099
Garb_10339	69	64567	7.6	3	3	94.92	3e-26	gi|1345933	Citrate synthase, glyoxysomal	Cucurbita maxima	0.417537		1.26904		1.07181
cotton_GLEAN_10022804	65	44037	13.6	4	1	100	0	gi|211906500	pyruvate dehydrogenase alpha subunit	Gossypium hirsutum	---		---		---
Garb_09915	63	40399	10	2	1	95.88	1e-51	gi|110808205	Succinate dehydrogenase [ubiquinone] iron-sulfur subunit 2, mitochondrial	Arabidopsis thaliana	---		---		---
cotton_GLEAN_10035774	61	59730	6.6	2	2	89.55	0	gi|225456404	glutamate-1-semialdehyde 2,1-aminomutase, chloroplastic	Vitis vinifera	0.851789		1.25945		1.03842
Garb_03857	60	56782	3.8	1	1	90.54	0	gi|356501618	ATP-citrate synthase alpha chain protein 1-like	Glycine max	---		---		---
Garb_09859	59	31225	20.2	3	3	73.03	1e-75	gi|18401719	succinate dehydrogenase 5	Arabidopsis thaliana	0.97561		0.640205		0.606061
cotton_GLEAN_10019770	59	78648	8.2	4	1	89.53	8e-75	gi||10834736	NAD-dependent malic enzyme	Cucurbita pepo	0.894454		1.0917		1.00301
Garb_11892	55	66913	2.8	1	1	93.79	5e-147	gi|16980767	NADP-dependent glyceraldehyde-3-phosphate dehydrogenase	Platanus x acerifolia	---		---		---
Garb_27225	52	34837	7.6	1	1	75.59	9e-122	gi|255544534	glyceraldehyde 3-phosphate dehydrogenase, putative	Ricinus communis	0.692521		1.61551		1.13379
cotton_GLEAN_10024900	46	70339	4.4	2	2	87.96	4e-139	gi|374256015	putative cytosolic phosphoglucose isomerase protein, partial	Elaeis guineensis	0.487805		0.673	*	0.58
Garb_06784	43	53824	7.2	2	2	93.46	8e-68	gi|356600135	ATP-utilizing phosphofructokinase	Citrus maxima	1.253	*	0.88574		1.061
cotton_GLEAN_10025789	43	43231	7.1	1	1	75.75	5e-118	gi|110740865	quinone reductase-like protein	Arabidopsis thaliana	---		---		---
Garb_09750	40	71752	2.7	1	1	78.12	0	gi|255575742	phosphoglucomutase, putative	Ricinus communis	---		---		---
Garb_04241	38	81649	2.1	1	1	79.59	0	gi|75266244	Glycerol-3-phosphate dehydrogenase SDP6, mitochondrial	Arabidopsis thaliana	---		---		---
cotton_GLEAN_10004736	220	92654	16.1	8	4	95	1e-64	gi|254546420|gb|ACT66296.1|	putative transketolase	Fragaria vesca	1.704	*	0.733	*	1.219
Garb_10522	37	50072	2.8	1	1	86.06	4e-120	gi|56122686	glycerophosphodiester phosphodiesterase-like protein	Manihot esculenta	---		---		---
Garb_26503	37	48595	6.1	1	1	77.19	2e-155	gi|225426554	alcohol dehydrogenase-like	Vitis vinifera	---		---		---
Garb_32571	36	62770	4	1	1	93.14	7e-94	gi|356600103	citrate synthase	Citrus sinensis	---		---		---
Garb_09257	36	65067	3	1	1	87.5	1e-112	gi|16305089	hexokinase	Prunus persica	---		---		---
Garb_29288	36	76110	3.2	2	2	90.62	9e-104	gi|148807201	putative NAD dependent malic enzyme	Prunus dulcis	1.24688		1.27065		1.24069
Garb_09922	34	68598	2.3	1	1	97.65	2e-42	gi|50363168	glucose-6-phosphate dehydrogenase	Capsicum annuum	---		---		---
Garb_32999	30	56634	2.4	1	1	87	0	gi|75205256	ATP-citrate synthase alpha chain protein 1	Arabidopsis thaliana	---		---		---
Garb_06651	30	50932	2.5	1	1	96.49	3e-157	gi|18072795	glyceraldehyde-3-phosphate dehydrogenase	Capsicum annuum	---		---		---
Garb_25701	30	44145	4.6	1	1	95.45	3e-55	gi|110681470	potassium channel beta subunit	Platanus x acerifolia	---		---		---
Garb_24411	28	61999	1.6	1	1	85.88	2e-38	gi|18201641	branched chain alpha-keto acid dehydrogenase E1-alpha subunit, partial	Oryza sativa Japonica Group	---		---		---
Garb_07988	27	13084	15.3	1	1	71.88	2e-35	gi|169930149	chloroplast ferredoxin	Capsicum annuum	---		---		---
Garb_11363	26	51373	2.5	1	1	90	2e-18	gi|301087139	fructose-1,6-bisphosphatase	Arachis diogoi	---		---		---
					Mitochondrion (31)
Garb_16553	1176	68201	42	16	15	100	0	gi|242129046	ATP synthase beta subunit 1	Gossypium hirsutum	0.616143		0.909091		0.786782	*
cotton_GLEAN_10015770	334	46337	28	7	3	65.88	8e-129	gi|122216326	Perakine reductase	Rauvolfia serpentina	0.635728	*	0.68306		0.666223	*
cotton_GLEAN_10038452	252	19618	11.3	1	1	73.47	3e-36	gi|118573556	Ferredoxin	Synechocystis sp	0.97371		1.12994	*	1.03306
cotton_GLEAN_10000743	226	68855	10.8	4	3	45.29	2e-114	gi|118585329	Reticuline oxidase-like protein	Arabidopsis thaliana	0.719942	*	1.0142		0.829187	*
cotton_GLEAN_10003939	195	60289	7.3	3	3	94.88	0	gi|55976870	F1-ATPase alpha subunit	Abutilon x hybridum	1.45349		0.4	*	0.927
Garb_05894	162	62941	10.9	3	1	97.37	5e-15	gi|39931311	Fumarate hydratase 1, mitochondrial	Arabidopsis thaliana	0.576701		0.908265		0.769231
Garb_36237	153	61415	14	4	2	88.55	0	gi|372290994	atpB gene product (chloroplast)	Gossypium raimondii	1.24224		1.08225		1.14548
cotton_GLEAN_10001405	146	22913	11.2	1	1	78.69	6e-48	gi|124502497	blue copper-like protein	Gossypium hirsutum	1.03199		0.55991	*	0.733676	*
Garb_18302	140	96394	5.9	4	1	56.84	2e-17	gi|21542216	Reticuline oxidase	Papaver somniferum	0.41841	*	0.720981	*	0.608643
cotton_GLEAN_10032554	135	65800	8.4	3	1	89.19	5e-13	gi|39931311	Fumarate hydratase 1, mitochondrial	Arabidopsis thaliana	0.789266		0.799361		0.807103
Garb_06608	112	20514	19.3	2	2	73.2	3e-38	gi|119934	Arabidopsis thaliana	Synechocystis sp	0.784929	*	1.11111		0.99108
Garb_07266	106	61801	6.8	3	1	94.98	0	gi|91208909	ATP synthase CF1 beta subunit	Gossypium hirsutum	0.478	*	0.564		0.541
Garb_26322	105	24419	21.9	3	2	95.52	2e-107	gi|242129048	ATP synthase delta subunit 2	Gossypium hirsutum	0.432	*	0.681	*	0.566	*
Garb_35608	94	60209	9.6	3	3	70	2e-77	gi|114682	ATP synthase subunit O, mitochondrial	Ipomoea batatas	0.815661		0.84674		0.814996
Garb_19010	90	43534	25.7	6	6	78.05	1e-130	gi|75268200	Electron transfer flavoprotein subunit alpha, mitochondrial	Arabidopsis thaliana	1.20048		0.931966		1.04603
Garb_05504	77	24485	13.4	2	1	97.51	4e-109	gi|242129050	ATP synthase delta subunit 3	Gossypium hirsutum	0.442	*	1.08342		0.984
Garb_19761	73	77737	6.3	3	3	95.71	6e-35	gi|356496070	succinate dehydrogenase [ubiquinone] flavoprotein subunit, mitochondrial-like	Gossypium hirsutum	0.745156		1.04058		0.913242
Garb_26536	70	22406	14	2	1	93.42	1e-41	gi|75193983	Cytochrome c oxidase subunit 6b-1	Arabidopsis thaliana	---		---		---
Garb_22166	68	21590	17.1	2	2	95.73	6e-89	gi|221185999	blue copper-like protein	Gossypium hirsutum	1.23609		0.809717		1.00503
Garb_21810	63	42080	8.1	2	1	91.16	2e-75	gi|110808205	Succinate dehydrogenase [ubiquinone] iron-sulfur subunit 2, mitochondrial	Arabidopsis thaliana	---		---		---
Garb_14884	54	16000	8.2	1	1	75.68	4e-07	gi|226530595	ATPase inhibitor	Zea mays	0.915751		0.899281		0.919118
Garb_21752	54	43403	4.6	1	1	98.88	4e-141	gi|35187468	fiber protein Fb33	Gossypium barbadense	---		---		---
Garb_30286	50	26254	6	1	1	92.26	3e-85	gi|255577651	ATP synthase D chain, mitochondrial, putative	Gossypium hirsutum	1.56006		0.940734		1.19332	*
Garb_25096	48	20957	9.1	1	1	100	7e-64	gi|290490174	ATP synthase CF1 alpha subunit protein	Gossypium hirsutum	---		---		---
Garb_05729	48	59587	6.1	3	2	91.63	8e-130	gi|21618217	putative dihydrolipoamide succinyltransferase	Arabidopsis thaliana	0.321543		1.46413		0.993049
cotton_GLEAN_10026854	48	89159	11	5	3	70.25	1e-91	gi|359480840	formation of crista junctions protein 1-like	Vitis vinifera	0.87108		0.923361		0.912409
Garb_11318	44	8629	26.9	1	1	61.9	1e-15	gi|13959383	MOSC domain-containing protein	Linum usitatissimum	---		---		---
Garb_38895	41	10837	11	1	1	92.31	9e-08	gi|223667976	F1-ATPase alpha subuni	Isotria medeoloides	---		---		---
Garb_09383	39	9088	30.1	3	3	89.55	2e-28	gi|282848224	ubiquinol-cytochrome C reductase	Jatropha curcas	1.05708		0.854701		0.926784
Garb_03583	34	35437	3	1	1	76	6e-126	gi|24211999	Mitochondrial carnitine/acylcarnitine carrier-like protein	Arabidopsis thaliana	---		---		---
Garb_08886	28	24387	5	1	1	64.55	1e-30	gi|123388128	2Fe-2S ferredoxin	Rickettsia bellii	---		---		---
					NADH REDOX (20)
cotton_GLEAN_10009958	507	67883	21.7	8	5	81.78	0	gi|118582304	Methylmalonate-semialdehyde dehydrogenase	Arabidopsis thaliana	1.94175		0.96432		1.37363	*
cotton_GLEAN_10017016	236	94163	13.3	7	7	82.61	0	gi|3122572	NADH dehydrogenase	Solanum tuberosum	1.511		0.940734		1.242	*
cotton_GLEAN_10003993	224	53195	24.5	8	5	81.44	8e-172	gi|3913653	Ferredoxin--NADP reductase, embryo isozyme, chloroplastic	Oryza sativa subsp. japonica	1.62338	*	1.49701		1.3587
Garb_19690	177	19696	11.3	1	1	82.61	4e-28	gi|55736067	auxin-induced putative ferredoxin, partial	Arachis hypogaea	0.968054		1.10375		1.0142
Garb_11920	149	38688	24	5	2	88.28	2e-125	gi|3913648	Ferredoxin--NADP reductase, root isozyme, chloroplastic	Pisum sativum	1.27714		1.75747		1.53374
Garb_00364	137	24122	26.5	4	4	86.75	4e-81	gi|255545146	NADH dehydrogenase, putative	Ricinus communis	1.0846		1.15607		1.03413
cotton_GLEAN_10035710	118	50050	18.1	4	4	98.77	1e-180	gi|211905343	Ted2	Gossypium hirsutum	1.10619		1.10254		1.12233
Garb_19216	114	26019	25.9	3	3	79.59	3e-88	gi|225465847	NADPH:quinone oxidoreductase	Vitis vinifera	0.374251	*	0.813008	*	0.570125	*
Garb_15335	95	65721	12.9	5	5	98.01	0	gi|40850676	betaine-aldehyde dehydrogenase	Gossypium hirsutum	1.21212		0.782473		0.982318
cotton_GLEAN_10038789	74	63765	6.6	3	3	75.2	0	gi|118575126	Succinate-semialdehyde dehydrogenase, mitochondrial	Arabidopsis thaliana	1.06496		0.847458		0.921659
Garb_00279	67	46997	10.7	2	2	65.8	9e-132	gi|21431800	NADP-dependent alkenal double bond reductase P2	Arabidopsis thaliana	0.471698		0.659196	*	0.576037	*
Garb_11032	62	78682	4.8	2	2	86.89	3e-148	gi|115420	NADP-dependent malic enzyme	Phaseolus vulgaris	0.807754		0.733676	*	0.766284
Garb_13553	58	63601	12	5	5	97.3	0	gi|190895712	esterase/lipase/thioesterase a	Populus tremula	0.596	*	1.119		0.813	*
Garb_01084	56	14253	11.2	1	1	78.95	1e-35	gi|357448965	NADH dehydrogenase	Medicago truncatula	1.43266		1.26582		1.31062
Garb_19976	53	18547	18.9	2	2	83.33	3e-61	gi|255543927	NADH dehydrogenase, putative	Ricinus communis	0.572		1.01112		0.778	*
Garb_36993	51	36624	4.6	1	1	85.71	2e-136	gi|5597911	NADH:cytochrome b5 reductase	Vernicia fordii	---		---		---
Garb_35474	49	75326	6.8	2	2	88.54	1e-48	gi|75171117	NADH dehydrogenase [ubiquinone] iron-sulfur protein 4, mitochondrial	Arabidopsis thaliana	0.8		1.42248		1.17925
cotton_GLEAN_10000008	41	9505	17.8	1	1	100	6e-37	gi|377806976	nad9 gene product (mitochondrion)	Populus tremula	---		---		---
Garb_17276	35	30591	5.5	1	1	97.33	1e-37	gi|30841446	fiber protein Fb14	Gossypium barbadense	0.716332		0.673854		0.683995
Garb_06379	27	26623	4.2	1	1	97.4	1e-77	gi|48843827	putative NADH-ubiquinone oxidoreductase 20 kDa subunit	Oryza sativa Japonica Group	---		---		---
					others (10)
cotton_GLEAN_10006221	737	77737	21.9	9	3	98	6e-21	gi|299829904	ATP:citrate lyase, partial	Strelitzia nicolai	0.41684	*	1.02987		0.670691	*
Garb_16040	372	73746	24	10	3	99.11	0	gi|300119952	nitrite reductase protein	Gossypium hirsutum	1.79533	*	1.50376	*	1.72414
Garb_13034	276	47525	19.9	5	5	99.41	0	gi|211906446	adenosine kinase	Gossypium hirsutum	0.589971		1.16414		0.884173
Garb_17144	192	37714	20.5	5	5	92.83	9e-121	gi|51512147	putative dicarboxylate/tricarboxylate carrier	Helianthus tuberosus	0.754148		1.20482		0.947867
Garb_12658	146	48262	7.8	2	1	77.53	8e-37	gi|356570219	IN2-2 protein-like	Glycine max	---		---		---
Garb_29531	107	48099	16	4	3	69.3	6e-141	gi|378548275	Probable aldo-keto reductase 1	Glycine max	0.898473		1.11235		0.95057
Garb_03399	106	48119	19.9	6	6	97.08	0	gi|1922251	farnesyl pyrophosphate synthase	Gossypium arboreum	0.851789		0.821018	*	0.786782	*
Garb_36139	57	75280	5.1	2	2	83.91	3e-173	gi|1170606	Adenylate kinase, chloroplastic	Zea mays	1.37363	*	0.424809	*	0.742942
Garb_32007	44	18761	9	1	1	76.12	5e-56	gi|255544266	electron transporter, putative	Ricinus communis	---		---		---
Garb_33846	31	34618	6.1	1	1	92.5	1e-59	gi|357477155	Adenylate kinase B	Medicago truncatula	---		---		---
					Carbonhydrate related Metabolism (56)
Garb_34365	753	47218	30.6	9	3	89.97	1e-172	gi|78099751	Fructose-bisphosphate aldolase cytoplasmic isozyme	Craterostigma plantagineum	0.948767		1.14943	*	1.04932
cotton_GLEAN_10014807	655	47577	27.3	7	1	90.72	6e-169	gi|1168410	Fructose-bisphosphate aldolase, cytoplasmic isozyme 2	Oryza sativa subsp. japonica	0.951475		0.907441		0.928505
Garb_14205	577	87347	11.6	5	4	99.62	2e-155	gi|377824753	pectin methylesterase	Gossypium hirsutum	0.301386	*	0.895255		0.666223	*
Garb_15004	517	27071	22.1	7	1	80.6	3e-58	gi|255574501	glycine cleavage system h protein, putative	Ricinus communis	1.37741		1.03093		1.18765
cotton_GLEAN_10000975	510	20916	29.7	7	1	84.52	3e-73	gi|121080	Glycine cleavage system H protein, mitochondrial	Pisum sativum	1.13122		0.801925	*	0.938967
Garb_21495	488	131433	14.2	11	3	87.74	0	gi|1351856	Aconitate hydratase, cytoplasmic	Arabidopsis thaliana	0.626566		1.09649		0.812348
Garb_19527	434	57299	31	10	10	52.75	2e-86	gi|166225542	Transaldolase	Acidothermus cellulolyticus	1.1325		0.95511		1.06838
cotton_GLEAN_10021350	412	109335	21	7	1	100	0	gi|324984223	sucrose synthase 1	Gossypium barbadense	1.14416	*	0.932836		0.968054
Garb_03337	401	114881	12.1	8	3	92.78	9e-105	gi|356600127	aconitase	Citrus maxima	0.994036		1.05152		1.00806
Garb_24658	394	126450	16.1	11	6	91.97	0	gi|285309967	aconitate hydratase 3	Citrus clementina	0.477099	*	1.33511		0.803213
cotton_GLEAN_10008068	383	41875	25	6	4	99.09	0	gi|393395650	FRK2	Gossypium herbaceum	0.914077		1.00301		0.937207
cotton_GLEAN_10035167	360	128359	10.5	8	1	92.24	3e-58	gi|329133703	putative aconitase	Lupinus luteus	---		---		---
cotton_GLEAN_10013483	359	99773	18.1	9	9	85.87	2e-41	gi|125549929	hypothetical protein OsI_17618	Oryza sativa Indica Group	1.31926	*	1.04712		1.26103
cotton_GLEAN_10021338	310	72335	14.1	6	5	97	0	gi|377824751	pectin methylesterase	Gossypium hirsutum	0.88968		0.909091		0.933707
Garb_26290	302	63802	11.7	3	2	94.97	3e-148	gi|351735428	3-phosphoglycerate kinase	Kengyilia kokonorica	1.49254		1.41443		1.43885
cotton_GLEAN_10003997	298	114167	9.6	7	7	83.33	4e-19	gi|357496833	Alpha-glucosidase	Medicago truncatula	0.626566	*	1.44509	*	1.00503
cotton_GLEAN_10002743	294	85049	15.3	7	2	84.04	4e-41	gi|110832705	alpha-L-arabinofuranosidase	Prunus salicina	0.447027		0.781861		0.629327
cotton_GLEAN_10001225	286	34105	28.5	7	1	87.87	1e-124	gi|255558692	glyoxalase II, putative	Ricinus communis	---		---		---
Garb_10266	282	109337	18.3	7	1	100	0	gi|359357829	sucrose synthase 3	Gossypium barbadense	---		---		---
Garb_39562	273	65902	17.4	7	5	71.57	0	gi|255573722	Pectinesterase-1 precursor, putative	Ricinus communis	0.88574		0.689655		0.845309
Garb_20545	229	83366	6.2	7	2	80	4e-79	gi|160948409	Hedgehog-interacting protein 1	Citrus medica	2		1.15473		1.43266	*
cotton_GLEAN_10034716	216	38721	23.5	7	3	88.6	2e-157	gi|295687231	triosephosphate isomerase	Gossypium hirsutum	0.672948		0.720981	*	0.677507	*
Garb_14647	209	111248	11.9	7	1	99.5	0	gi|359357825	sucrose synthase 1	Gossypium barbadense	---		---		---
cotton_GLEAN_10013335	202	33681	20.7	7	1	82.9	1e-133	gi|75172889	Gamma carbonic anhydrase 1, mitochondrial	Arabidopsis thaliana	0.569476		1.04493		0.769231	*
cotton_GLEAN_10006191	191	33239	28	7	4	99.61	3e-128	gi|211906460	triosephosphate isomerase	Gossypium hirsutum	0.93633		0.788644		0.823723
Garb_03474	184	94052	13.7	7	4	95.81	1e-82	gi|151368158	chloroplast transketolase precursor, partial	Gossypium barbadense	0.755287		1.51286		1.05708
Garb_22753	173	72029	14.2	7	2	72.19	0	gi|118573090	Dihydrolipoyllysine-residue acetyltransferase component 2 of pyruvate dehydrogenase complex, mitochondrial	Arabidopsis thaliana	0.143431		1.10254		0.634115
cotton_GLEAN_10009793	154	45856	22.2	7	1	95.62	4e-74	gi|63192216	putative nucleotide sugar epimerase	Cucumis sativus	---		---		---
Garb_07435	148	118410	6.9	7	1	83.56	0	gi|255581663	alpha-glucosidase, putative	Ricinus communis	0.725163		1.08932		0.925069
Garb_27636	132	57140	3.4	7	1	82.15	2e-163	gi|255559665	alpha-galactosidase/alpha-n-acetylgalactosaminidase, putative	Ricinus communis	0.669344	*	0.877963		0.726744	*
cotton_GLEAN_10008393	132	76679	13.5	7	5	73.71	0	gi|385282634	cell wall invertase 1	Prunus persica	1.00908		0.911577		0.933707
Garb_28632	132	45875	22.2	7	1	95.89	0	gi|225435012	PREDICTED: UDP-glucuronic acid decarboxylase 1	Vitis vinifera	---		---		---
Garb_09904	127	148955	5.7	7	5	55.66	7e-174	gi|75304739	Beta-fructofuranosidase, insoluble isoenzyme CWINV6	Arabidopsis thaliana	0.699301		1.16279		0.901713
Garb_07131	117	60073	11.6	7	3	92.57	6e-74	gi|295830995	AT5G39320-like protein	Neslia paniculata	1.2987		0.901713		1.06496
Garb_15909	116	102735	4.5	7	2	97.16	0	gi|345104535	sucrose synthase SusA1	Gossypium darwinii]	0.84674		0.75358		0.788022
Garb_11746	115	68252	2.7	7	1	80	2e-118	gi|357442413	Pectinesterase	Medicago truncatula]	1.94175		0.634518	*	1.12486
Garb_21160	107	40875	8.5	7	2	93.79	7e-168	gi|255553267	6-phosphogluconate dehydrogenase, putative	Ricinus communis	1.44092		1.51745	*	1.37741	*
Garb_13593	103	74630	7.2	7	2	89.8	0	gi|2499489	Pyrophosphate--fructose 6-phosphate 1-phosphotransferase subunit beta	Ricinus communis	0.95057		0.752445		0.837521
Garb_11767	96	52754	10	7	2	37.03	2e-49	gi|122140368	Adipocyte plasma membrane-associated protein	Bos taurus	1.1274		1.40845		1.35318	*
Garb_19225	88	31616	6.7	7	2	69.49	3e-16	gi|66275748	putative endo-1,3;1,4-beta-D-glucanase	Fragaria x ananassa	1.60256		0.84317	*	1.14416
Garb_06228	74	77493	2.1	7	1	78.6	1e-108	gi|91981275	pectin methylesterase, partial	Citrus bergamia	0.326904	*	0.77821		0.570776	*
Garb_21904	68	104208	3.7	7	2	69.87	9e-96	gi|255545654	hypothetical protein RCOM_1	Ricinus communis	5.12821		1.30719		1.3986
Garb_04825	63	57811	6.5	7	2	74.31	0	gi||113781	Alpha-amylase	Vigna mungo	0.438404		0.672495	*	0.565931
cotton_GLEAN_10006392	63	87466	3.3	7	1	78.21	0	gi|359480881	beta-galactosidase 3-like	Vitis vinifera	---		---		---
Garb_03627	61	63505	1.8	7	1	38.71	1e-31	gi|2501494	Anthocyanidin 3-O-glucosyltransferase 5	Manihot esculenta	---		---		---
Garb_01616	59	67771	2.5	7	1	82.96	0	gi|75171244	6-phosphofructokinase 4, chloroplasticV=1	Arabidopsis thaliana	---		---		---
cotton_GLEAN_10028667	55	76734	4.7	7	2	58.66	0	gi|75102977	Beta-fructofuranosidase, insoluble isoenzyme CWINV1	Arabidopsis thaliana	1.15207		1.18203		1.21803
Garb_08368	52	20773	13.8	7	2	78.33	1e-51	gi|81903500	Adrenodoxin-like protein, mitochondrial	Mus musculus	1.41443		0.696379		0.937207
Garb_15291	51	147389	3.5	7	2	94.89	3e-72	gi|349592191	glycine decarboxylase complex subunit T	Cicer arietinum	0.265675	*	1.14286		0.665336
Garb_30577	48	37605	9.2	7	1	80.87	2e-128	gi|543905	Brassinosteroid-regulated protein BRU1	Glycine max	---		---		---
Garb_06726	44	35615	13.4	7	1	62.29	3e-75	gi|6226027	Probable ribose-5-phosphate isomerase	Arabidopsis thaliana	---		---		---
Garb_23881	41	35886	4.7	7	1	76.92	1e-119	gi|255566458	tropinone reductase, putative	Ricinus communis	1.21803		0.752445	*	0.940734
Garb_15183	37	35860	7.3	7	1	90.69	3e-126	gi|122194126	Phosphomannomutase	Glycine max	---		---		---
cotton_GLEAN_10027236	35	21401	12.1	7	1	83.64	1e-77	gi|2499417	Glycine cleavage system H protein, mitochondrial	Flaveria anomala	---		---		---
Garb_24736	32	49040	3.4	7	1	100	0	gi|393395652	FRK3	Gossypium herbaceum	---		---		---
Garb_26225	29	132041	1.4	7	1	93.94	9e-140	gi|349592189	glycine decarboxylase complex subunit P	Cicer arietinum	---		---		---
					Amino acid metabolism (54)
Garb_10659	503	103107	22.4	12	4	96.61	3e-61	gi|224166603	vitamin-b12 independent methionine synthase	Populus trichocarpa	0.502765		0.683527	*	0.607165
Garb_14207	444	68540	18.2	8	6	79.34	3e-96	gi|380876854	Alanine aminotransferase 1, mitochondrial	Arabidopsis thaliana	0.645995		0.65445	*	0.653595
cotton_GLEAN_10004660	426	52851	26.4	7	7	84.78	1e-155	gi|41019511	Cysteine synthase, mitochondrial	Arabidopsis thaliana	0.49505	*	1.14025		0.851064
Garb_20041	389	63942	24.6	11	7	100	0	gi|211906466	serine hydroxymethyltransferase	Gossypium hirsutum	0.829187		0.793021		0.932836
Garb_13033	318	46356	31.4	8	8	96.43	2e-127	gi|308171600	isopropylmalate dehydrogenase	Ipomoea alba	0.851064		0.777001		0.873362
Garb_06740	233	54494	24.6	7	3	96.55	3e-26	gi|12229816	Probable glutamate dehydrogenase 3	Arabidopsis thaliana	1.12994		0.877963		0.894454
Garb_11834	201	56863	20.9	6	3	93.23	9e-164	gi|226452183	chloroplast glutamine synthetase	Populus x canadensis	0.963391		1.3624		1.14025
cotton_GLEAN_10019425	200	46523	13.6	4	2	83.03	8e-155	gi|3914996	Phosphoserine aminotransferase, chloroplastic	Arabidopsis thaliana	1.11857		1.07991		1.08108
Garb_12349	191	56985	15.6	5	5	88.18	1e-161	gi|229463815	N2-acetylornithine deacetylase	Populus maximowiczii x Populus nigra	1.05708		0.881834		1.02249
Garb_17689	174	144606	4.1	3	1	65.22	1e-10	gi|189029755	Phosphoserine aminotransferase	Acidovorax citrulli	1.26904		1.78253		1.45349	*
Garb_29968	159	46053	23.9	6	4	99.42	0	gi|211906462	glutamine synthase	Gossypium hirsutu	1.4771		1.10132		1.23153
Garb_23864	144	51488	16.5	6	6	99.26	0	gi|366984546	putative aspartate aminotransferase 1	Gossypium hirsutum	1.21951		0.870322		1.0142
cotton_GLEAN_10009662	143	47928	12.1	3	3	94.21	2e-94	gi|98375996	beta-cyanoalinine synthase	Fagus sylvatica	0.786164		1.5748	*	1.13507
Garb_08541	135	68333	14.1	6	6	99.16	2e-140	gi|156066904	3-deoxy-arabino heptulosonate 7-phosphate synthase	Gossypium hirsutum	1.03413		0.753012		0.815661
cotton_GLEAN_10030620	132	43669	15.4	4	1	88.08	1e-169	gi|255584961	aspartate semialdehyde dehydrogenase, putative	Ricinus communis	---		---		---
Garb_41221	120	73094	9.1	5	1	80.67	0	gi|160419153	Pectinesterase	Actinidia deliciosa	1.14286		1.08108		1.14025
Garb_37664	119	33103	12.4	2	1	79.58	2e-56	gi|327493153	stem-specific protein TSJT1-like protein	Solanum nigrum	0.807754		0.797448		0.808407
Garb_01412	116	73027	5.3	2	2	92.18	4e-163	gi|374256093	putative ketol-acid reductoisomerase protein, partial	Elaeis guineensis	0.847458		1.09529		0.942507
Garb_24705	112	45776	16.3	4	1	99.72	0	gi|159138921	glutamine synthetase	Gossypium hirsutu	---		---		---
Garb_28301	101	81682	4.7	2	2	92.06	3e-25	gi|244536877	putative isopropylmalate synthase	Brassica juncea	1.5361		1.1976	*	1.26263
Garb_11956	85	48039	5.3	2	2	81.38	5e-169	gi|255561228	aspartate kinase, putative	Ricinus communis	2.14592	*	1.13766		1.52672
Garb_18642	82	51245	6.2	2	2	89.08	1e-118	gi|21759264	3-isopropylmalate dehydrogenase 3, chloroplastic	Arabidopsis thaliana	1.49701		1.31579		1.38889
cotton_GLEAN_10014464	81	73925	6.6	3	3	94.81	2e-71	gi|308743337	asparagine synthetase 1	Solanum tuberosum	0.410678	*	0.717875	*	0.537057	*
Garb_29992	78	72383	3.8	2	2	94.05	2e-41	gi|313509683	glycine hydroxymethyltransferase	Aster amellus	2.10084	*	1.48588	*	1.8018
Garb_07069	74	80697	9.2	4	1	88	0	gi|37718877	methylenetetrahydrofolate reductase, 3-partial	Oryza sativa Japonica Group	---		---		---
Garb_30683	70	32753	13.9	3	2	84.04	0	gi|225469455	asparagine synthetase B	Vitis vinifera	1.48368		1.52905		1.49925
cotton_GLEAN_10035518	69	61722	8.6	3	3	91.67	1e-17	gi|163256643	alanine amino-transferase	Medicago truncatula var. truncatula	0.815661		0.855432		0.798085
Garb_02767	68	75284	4.4	2	2	83.39	3e-113	gi|12643854	Imidazole glycerol phosphate synthase hisHF, chloroplastic	Arabidopsis thaliana	0.69979	*	1.18483	*	0.934579
Garb_02420	64	80138	4.2	2	2	92.54	0	gi|353681904	PAL	Gossypium hirsutum	1.31234		0.978474		1.11111
Garb_24031	64	67337	6	2	2	86.02	2e-91	gi|262181533	3-dehydroquinate dehydratase 02	Vitis vinifera	1.04822		1.0627		1.04493
Garb_10033	59	132124	4.3	4	4	74.68	5e-138	gi|62510916	Lysosomal alpha-mannosidase	Macaca fascicularis	1.07181		0.787402	*	0.926784
Garb_05022	52	114553	3.2	2	2	73.53	4e-91	gi|75100442	Bifunctional aspartokinase/homoserine dehydrogenase 2, chloroplastic	Arabidopsis thaliana	1.26422		1.15875		1.18064
Garb_28725	51	39865	9.8	2	2	67.52	6e-116	gi|417540	Pyrroline-5-carboxylate reductase	Pisum sativum	0.825764		1.05597		0.948767
Garb_05276	48	129203	1.2	1	1	97.56	2e-15	gi|163257175	membrane alanylamino-peptidase	Medicago truncatula var. truncatula	---		---		---
Garb_00213	47	136886	1.6	1	1	89.67	0	gi|255540223	acetolactate synthase, putative	Ricinus communis	---		---		---
cotton_GLEAN_10025334	45	76657	2.3	1	1	86.43	6e-108	gi|20140329	Asparagine--tRNA ligase, cytoplasmic 1	Arabidopsis thaliana	---		---		---
cotton_GLEAN_10037430	45	87896	2.5	1	1	82.02	1e-125	gi|353441090	C-terminal domain-containing protein	Elaeis guineensis	1.1655		1.84162		1.39665
cotton_GLEAN_10011913	44	50276	3.3	1	1	51.36	6e-114	gi|75332302	Sugar transporter ERD6-like 3	Arabidopsis thaliana	---		---		---
Garb_01644	44	28073	4	1	1	68.75	1e-40	gi|38258307	Single-stranded DNA-binding protein, mitochondrial	Arabidopsis thaliana	---		---		---
cotton_GLEAN_10015955	43	56519	5.1	2	2	81.11	2e-103	gi|229463813	N2-acetylornithine	Populus maximowiczii x Populus nigra	1.4771		1.75439		1.61812
Garb_03270	41	69837	3.4	1	1	96.88	6e-33	gi|95116497	putative glutamate decarboxylase	Theobroma cacao	0.588582		1.15607		0.875657
Garb_33809	39	67092	3.3	1	1	92.07	5e-108	gi|73912408	5-enolpyruvylshikimate-3-phosphate synthase	Lactuca sativa	---		---		---
Garb_24653	38	38195	6.2	1	1	78.8	6e-135	gi|25108880	Isoaspartyl peptidase/L-asparaginase 1	Arabidopsis thaliana	---		---		---
Garb_21736	37	37392	6.1	1	1	89.06	4e-27	gi|12651637	putative. similar to anthranilate synthase component II	Zea mays	---		---		---
Garb_14048	37	88396	4.9	2	2	85.2	3e-171	gi|3183094	Ornithine carbamoyltransferase, chloroplastic	Pisum sativum	1.87266	*	1.09529		1.41243
Garb_02551	36	61489	3	1	1	86.54	1e-19	gi|357468625	Aspartate aminotransferase	Medicago truncatula	---		---		---
Garb_32175	34	31116	6.4	1	1	97.4	2e-129	gi|34541994	Al-induced protein	Gossypium hirsutum	---		---		---
Garb_39155	34	63806	2.1	1	1	87.14	9e-72	gi|58802473	ornithine aminotransferase	Solanum lycopersicum	---		---		---
Garb_24723	34	52405	2.8	1	1	86.04	0	gi|56967310	Chain A, X-Ray Structure Of Gene	Arabidopsis thaliana	---		---		---
Garb_00294	34	63340	2.7	1	1	72.12	9e-30	gi|85683263	Alanine--glyoxylate aminotransferase 2 homolog 2, mitochondrial	Arabidopsis thaliana	---		---		---
Garb_03880	33	104700	1.7	1	1	75.29	3e-102	gi|465008	Urease	Canavalia ensiformis	---		---		---
Garb_10699	32	54508	2.7	1	1	86.39	0	gi|1168256	Aspartate aminotransferase, mitochondrial	Arabidopsis thaliana	---		---		---
Garb_35439	76	46600	3.8	1	1	88.74	0	gi|229830633	L-idonate 5-dehydrogenase	Vitis vinifera	0.464037		0.809061		0.600601	*
Garb_04501	26	60472	4.1	1	1	95.65	5e-20	gi|2388003451	At5g60160-like protein	Solanum hirtum	---		---		---
					Lipid metabolism (64)
Garb_04701	1062	91871	17.1	10	4	59.17	0	gi|115502214	Probable glycerophosphoryl diester phosphodiesterase 3	Arabidopsis thaliana	1.64474		0.94697		1.13766
cotton_GLEAN_10018512	724	50232	32.4	8	3	90.67	1e-111	gi|255582864	acetyl-CoA acetyltransferase, mitochondrial, putative	Ricinus communis	0.494071	*	1.17647		0.956023
Garb_25176	690	60714	32.2	8	3	91.8	2e-17	gi|322719136	acetyl-CoA C-acetyltransferase	Bacopa monnieri	0.50813	*	1.38696		0.986193
Garb_19557	363	56611	26	6	6	96.24	6e-68	gi|15027813	3-ketoacyl-CoA thiolase	Gossypium hirsutum	0.613121		1.287	*	0.963391
Garb_04689	337	56554	32.4	11	11	82.74	0	gi|255560311	diphosphomevalonate decarboxylase, putative	Ricinus communis	1.13766		1.10011		1.15607
Garb_43153	208	19529	21.2	2	2	80.62	5e-53	gi|255566183	Phosphatidylglycerol/phosphatidylinositol transfer protein precursor, putative	Ricinus communis	1.1534		1.23305	*	1.28041	*
cotton_GLEAN_10036367	195	58074	23.1	6	6	87.5	1e-18	gi|73919871	3-ketoacyl-CoA thiolase 2, peroxisomal	Arabidopsis thaliana	0.349895	*	0.561482	*	0.452899
Garb_24866	179	52760	15.2	4	4	85.32	0	gi|527504049	Isovaleryl-CoA dehydrogenase 2, mitochondrial	Solanum tuberosum	0.696864	*	0.854701	*	0.784929	*
cotton_GLEAN_10031429	172	50711	19.3	7	3	79.89	4e-180	gi|359484612	3-hydroxyisobutyryl-CoA hydrolase-like protein 3, mitochondrial-like isoform 2	Vitis vinifera	0.795545		0.874891		0.803213
cotton_GLEAN_10010089	172	73459	12.3	5	5	87.5	5e-10	gi|299830174	methylcrotonyl-CoA carboxylase beta chain, partial	Musa acuminata	0.639795	*	0.761035		0.765697	*
Garb_35186	154	36334	18.1	4	2	77.59	5e-21	gi|302800874	hypothetical protein SELMODRAFT_421553	Selaginella moellendorffii	0.658328		0.616903		0.633714
Garb_12634	128	31546	17.4	3	3	92.7	1e-84	gi|356526195	3-isopropylmalate dehydratase small subunit-like	Glycine max	0.760456		0.972763		0.868056
Garb_34909	127	43592	8.6	2	2	60.24	1e-111	gi|75181338	GDSL esterase/lipase At5g03610	Arabidopsis thaliana	1.04932		0.819672		0.881057
Garb_17434	124	113279	5.6	3	1	98.95	0	gi|156144962	chloroplast acetyl-CoA carboxylase carboxyltransferase alpha subunit	Gossypium hirsutum	---		---		---
Garb_20406	124	50326	18	5	1	93.1	2e-08	gi|237654	NADH-enoyl ACP reductase	Brassica napus	---		---		---
cotton_GLEAN_10000705	114	98704	4.7	3	3	77.04	4e-79	gi|75181027	GDSL esterase/lipase At5g14450	Arabidopsis thaliana	0.649351		1.11607		0.918274
cotton_GLEAN_10017439	109	112566	6	3	1	97.89	0	gi|156144960	chloroplast acetyl-CoA carboxylase carboxyltransferase alpha subunit	Gossypium hirsutum	---		---		---
Garb_23667	108	54576	7.3	3	3	78.12	2e-07	gi|356552476	3-hydroxyisobutyryl-CoA hydrolase-like protein 4, mitochondrial-like	Vitis vinifera	1.57978		1.21803		1.36799
cotton_GLEAN_10009908	103	56840	7.5	3	2	86.28	0	gi|359481155	acyl-coenzyme A oxidase 4, peroxisomal-like isoform 1	Vitis vinifera	0.834725		0.469263		0.551572
Garb_19855	103	32108	12	2	2	64.08	1e-30	gi|20532086	Putative DNA-binding protein ESCAROLA	Arabidopsis thaliana	1.63666		1.21359	*	1.36612
Garb_14213	96	93253	4.9	3	3	61.36	2e-114	gi|356574003	GDSL esterase/lipase 5-like	Glycine max	1.47275		1.13895		1.19904
Garb_09207	96	44239	22.1	5	5	72.73	9e-50	gi|62900702	Plastid lipid-associated protein 3	Brassica campestris	0.65703		0.792393		0.809717
Garb_16242	94	66573	5.6	2	2	59.45	5e-114	gi|255565204	triacylglycerol lipase, putative	Ricinus communis	1.38504		0.657462		0.809061
cotton_GLEAN_10035446	91	45954	11.8	3	3	73.23	9e-50	gi|18390047	Enod8-like protein	Medicago truncatula	0.463392	*	0.933707		0.724113
Garb_28811	84	64721	6	2	2	100	0	gi|325210939	acetyl-CoA carboxylase carboxyltransferase beta subunit	Gossypium thurberi	0.515996		0.817661		0.611621
cotton_GLEAN_10005715	79	70897	7.5	3	2	88.44	0	gi|294514718	4-coumarate:CoA ligase 1	Corchorus capsularis	0.958773		1.20337		1.05932
cotton_GLEAN_10037400	77	69388	7.3	4	4	78.38	1e-08	gi|74267199	allen oxide synthase	Nicotiana tabacum	0.85034		0.839631		0.847458
Garb_04476	70	99830	3.5	3	3	93.61	0	gi|75315624	Peroxisomal fatty acid beta-oxidation multifunctional protein AIM1	Arabidopsis thaliana	0.748503		1.0395		0.906618
Garb_20082	67	71949	3.4	1	1	80.38	1e-97	gi|94442938	AMP-binding protein	Platanus x acerifolia	---		---		---
cotton_GLEAN_10008882	59	48720	11.1	3	3	64.91	2e-60	gi|357497421	GDSL esterase/lipase	Medicago truncatula	0.735835		0.785546		0.88574
Garb_34777	57	115967	3	2	1	97.46	0	gi|124365601	bacterial-induced lipoxygenase	Gossypium hirsutum	0.295334		0.749625		0.546747
Garb_30190	56	39721	2.9	1	1	68.39	2e-138	gi|3183454	Uncharacterized oxidoreductase ykwC	Bacillus subtilis	2.94118	*	1.49925	*	2.06712	*
Garb_25848	55	91817	2.1	1	1	98.94	0	gi|74147576	ACS-like protein	Gossypium hirsutum	1.20919		1.00908		1.08696
Garb_10124	53	57468	3.6	1	1	88.57	2e-52	gi|77417693	glycerol-3-phosphate acyltransferase	Citrus mangshanensis	---		---		---
Garb_06766	52	115807	3.1	2	2	99.2	0	gi|337732519	bacterial-induced lipoxygenase	Gossypium hirsutum	0.464253	*	---		0.405022
cotton_GLEAN_10023686	52	49114	15.9	4	1	95.65	2e-15	gi|237653	NADH-enoyl ACP reductase [Brassica napus, Peptide Partial, 45 aa]	Brassica napus	---		---		---
Garb_15965	51	85900	4.5	2	2	89.01	0	gi|62286589	Peroxisomal acyl-coenzyme A oxidase 1	Arabidopsis thaliana	0.514139		0.869565		0.709723
Garb_10054	49	89415	1.7	1	1	93.07	4e-118	gi|20562917	acetyl CoA synthetase	Deschampsia antarctica	---		---		---
Garb_18613	46	52256	4.2	1	1	72.34	6e-167	gi|255560956	Esterase precursor, putative	Ricinus communis	---		---		---
cotton_GLEAN_10018917	46	53672	7.6	2	2	73.89	1e-164	gi|292630834	3-hydroxyisobutyryl-CoA hydrolase-like protein 5	Arabidopsis thaliana	0.645161		0.899281		0.862069
Garb_19712	46	87250	4.1	2	2	71.22	0	gi|342161829	Acyl-coenzyme A oxidase 3, peroxisomal	Arabidopsis thaliana	0.377786		0.502513		0.443459
cotton_GLEAN_10031242	46	90467	4.2	2	2	89.95	2e-107	gi|363818302	putative acyl-CoA oxidase protein	Elaeis guineensis	0.531915	*	0.504796		0.522466
Garb_34037	44	66498	2.3	1	1	98.84	0	gi|145910320	chloroplast biotin carboxylase	Gossypium hirsutum	---		---		---
Garb_11839	41	68118	3.7	1	1	99.02	0	gi|211906442	Myo-inositol-1-phosphate synthase	Gossypium hirsutum	---		---		---
cotton_GLEAN_10034472	41	57502	5.1	2	1	76.44	2e-68	gi|62286630	Acyl-coenzyme A oxidase 4, peroxisomal	Arabidopsis thaliana	---		---		---
Garb_39579	40	47115	5	1	1	64	5e-10	gi|356504064	PREDICTED: GDSL esterase/lipase At1g54790-like	Glycine max	---		---		---
Garb_23795	37	30474	3.3	1	1	94.29	1e-24	gi|226425219	biotin carboxyl carrier protein 1-1	Arachis hypogaea	---		---		---
Garb_20984	34	72955	5.1	2	2	72.46	0	gi|75299745	Malonate--CoA ligase	Arabidopsis thaliana	1.50602		1.27877		1.39082
Garb_27065	33	58944	2	1	1	61.9	3e-71	gi|378548264	Probable acyl-activating enzyme 1, peroxisomal	Arabidopsis thaliana	---		---		---
Garb_06767	32	27359	6.3	1	1	95.87	4e-62	gi|353441000	putative 3-hydroxyacyl-ACP dehydrogenase	Elaeis guineensis	---		---		---
cotton_GLEAN_10027782	32	46806	3.8	1	1	54.71	2e-106	gi|75170788	GDSL esterase/lipase At5g55050	Arabidopsis thaliana	---		---		---
Garb_26712	31	22110	6	1	1	71.34	1e-60	gi|255558816	acyl-CoA thioesterase, putative	Ricinus communis	---		---		---
Garb_04818	31	83246	2.1	1	1	65.16	2e-57	gi|255538374	conserved hypothetical protein	Ricinus communis	---		---		---
Garb_18894	30	60816	2.5	1	1	60.7	3e-107	gi|75099786	GDSL esterase/lipase At1g09390	Arabidopsis thaliana	---		---		---
Garb_04140	30	88569	2.3	1	1	100	9e-102	gi|159895677	phosphatidylserine decarboxylase 2	Gossypium hirsutum	---		---		---
Garb_10350	30	21710	6.3	1	1	76.47	1e-61	gi|255553935	acyl-CoA thioesterase, putative	Ricinus communis	---		---		---
Garb_17927	30	44388	4	1	1	52.94	2e-59	gi|75337419	Probable carboxylesterase 12	Arabidopsis thaliana	---		---		---
cotton_GLEAN_10012010	29	102433	1.2	1	1	79.13	1e-38	gi|75267758	Peroxisomal fatty acid beta-oxidation multifunctional protein MFP2	Arabidopsis thaliana	---		---		---
Garb_27214	29	47850	2.1	1	1	76.27	8e-171	gi|75099763	GDSL esterase/lipase At2g23540	Arabidopsis thaliana	---		---		---
Garb_13198	28	95049	1.3	1	1	79.13	1e-38	gi|275267758	Peroxisomal fatty acid beta-oxidation multifunctional protein MFP2	Arabidopsis thaliana	---		---		---
Garb_00853	27	59453	1.9	1	1	100	7e-07	gi|157042743	cytosolic acetoacetyl-coenzyme A thiolase, partial	Nicotiana langsdorffii	---		---		---
Garb_02345	26	31373	3.8	1	1	80.23	2e-36	gi|225459804	enoyl-CoA hydratase 2, peroxisomal	Vitis vinifera	---		---		---
Garb_08178	26	23571	6.7	1	1	82.56	2e-37	gi|134140878	allene oxide cyclase, partial	Nicotiana tabacum	---		---		---
Garb_04705	16	45186	1.5	1	1	60.17	5e-100	gi|255576260	acyltransferase, putative	Ricinus communis	---		---		---
					other metabolism (93)
Garb_28527	1232	58296	23.2	8	4	95.68	0	gi|383932356	epidermis-specific secreted glycoprotein EP1-like protein	Gossypium hirsutum	0.44964		0.830565	*	0.690131	*
cotton_GLEAN_10026382	726	68266	31.7	13	1	86.23	0	gi|255568744	aldehyde dehydrogenase, putative	Ricinus communis	0.515464		0.773994	*	0.688231
cotton_GLEAN_10028191	479	51666	36.4	9	1	96.95	0	gi|75308026	RecName: Full=S-adenosylmethionine synthase	Elaeagnus umbellata	0.883392		1.36054	*	1.08696
Garb_03259	457	69518	23.9	11	1	89.32	0	gi|359720700	aldehyde dehydrogenase ALDH2B4_V2	Ricinus communis	---		---		---
cotton_GLEAN_10021853	443	44677	26.5	7	3	88.81	3e-66	gi|255598502	aldo/keto reductase, putative	Ricinus communis	0.856164		1.2285	*	1.05597
cotton_GLEAN_10021644	437	35958	39.1	7	1	82.78	7e-126	gi|89258498	short chain alcohol dehydrogenase	Gossypium hirsutum	0.634921	*	0.665779	*	0.664011	*
Garb_08249	407	50566	22.3	7	3	96.41	0	gi|1220196	alcohol dehydrogenase 2a	Gossypium hirsutum	0.575043	*	2.6178	*	1.48148
Garb_23142	407	25042	36.8	6	2	89.29	4e-07	gi|304273299	glyoxalase I	Corchorus olitorius	0.618429		0.874126		0.758725
cotton_GLEAN_10008047	372	44507	25.1	7	3	86.76	1e-64	gi|728744	Auxin-induced protein PCNT115	Nicotiana tabacum	0.777605		1.45985	*	1.0582
Garb_22269	358	63959	37	12	10	99.56	0	gi|211906436	UDP-D-glucose pyrophosphorylase	Gossypium hirsutum	0.832639		0.728332	*	0.781861	*
Garb_01981	345	32992	30.8	5	1	90.51	1e-120	gi|261280336	triosphosphate isomerase-like protein type I	Dimocarpus longan	0.555247		0.996016		0.798722
cotton_GLEAN_10007220	291	48671	13.8	4	1	95.26	0	gi|1263291	alcohol dehydrogenase 2b	Gossypium hirsutum	---		---		---
Garb_09190	259	61088	19.4	6	6	87.23	0	gi|7546402	Chain A, Structures Of Adenylosuccinate Synthetase From Triticum Aestivum And Arabidopsis Thaliana	Arabidopsis Thaliana	1.29534	*	1.338	*	1.5528	*
Garb_17417	228	59221	17.8	5	2	100	4e-31	gi|29837373	putative IAA-Ala hydrolase	Gossypium herbaceum	0.97561		0.813008		0.884173
Garb_05514	207	20036	16.9	2	2	92.57	1e-76	gi|1346675	Nucleoside diphosphate kinase B	Flaveria bidentis	1.50376	*	1.638		1.523	*
Garb_06270	203	74713	10.5	4	4	82.98	6e-142	gi|38258655	Monocopper oxidase-like protein SKU5	Arabidopsis thaliana	1.978		1.118		1.444	*
Garb_16474	198	62349	17.7	6	6	90.14	5e-29	gi|63192028	inosine-5'-monophosphate dehydrogenase	Prunus armeniaca	0.775795		0.943396		0.824402
Garb_17776	197	40676	24	6	5	99.67	1e-175	gi|211906440	UDP-L-rhamnose synthase	Gossypium hirsutum	1.7301		1.44718	*	1.70068
Garb_16820	190	62533	12.5	4	1	79.78	2e-72	gi|2499946	Uridine 5'-monophosphate synthase	Nicotiana tabacum	---		---		---
Garb_08634	190	76295	11.9	5	1	77.94	0	gi|255546541	aldehyde dehydrogenase, putative	Ricinus communis	1.13636		0.37092	*	0.77101
Garb_16397	182	26415	19.6	3	3	78.66	1e-71	gi|359491781	PREDICTED: miraculin-like, partial	Vitis vinifera	0.528262		1.01317		0.765697
cotton_GLEAN_10038625	161	35112	12.8	3	1	82.42	8e-120	gi|317373297	Chain A, Crystal Structures Of HevamineA	Arabidopsis thaliana	0.585138	*	0.967118		0.912409	*
cotton_GLEAN_10040333	158	52399	12.6	3	2	84.17	0	gi|255559084	fumarylacetoacetate hydrolase, putative	Ricinus communis	0.755287		0.732601		0.87108
cotton_GLEAN_10024744	142	50750	10.5	4	4	100	8e-161	gi|133902306	alcohol dehydrogenase A	Gossypium hirsutum	0.613497		2.2779		1.05932
Garb_14625	135	57059	10.2	3	2	64.05	2e-160	gi|75248087	IAA-amino acid hydrolase ILR1-like 1	Oryza sativa subsp. japonica	1.0627		0.868056		0.954198
cotton_GLEAN_10028104	125	38623	20.8	5	4	72.41	2e-17	gi|55584187	Quinone oxidoreductase-like protein At1g23740, chloroplastic	Arabidopsis thaliana	0.716846		0.772201		0.623441	*
Garb_14153	122	40687	8.4	2	2	90.48	1e-41	gi||10720264	Probable small nuclear ribonucleoprotein	Arabidopsis thaliana	1.3947	*	0.911577		1.09649
Garb_22522	117	48564	3.5	1	1	80.99	4e-152	gi|21264504	Phosphoribosylformylglycinamidine cyclo-ligase, chloroplastic	Arabidopsis thaliana	0.666667	*	1.10497		0.874891
Garb_28524	116	127934	3.8	3	3	73.46	2e-176	gi|238064978	Uroporphyrinogen decarboxylase 1, chloroplastic	Arabidopsis thaliana	1.26103		1.27065	*	1.3089
Garb_20127	111	55284	15.4	4	3	76.36	6e-17	gi|6491763	aminoacylase-1	Solanum lycopersicum	0.835422		1.28535		1.10619
Garb_04752	110	25960	30.6	5	4	83.8	8e-87	gi|255565419	lactoylglutathione lyase, putative	Ricinus communis	1.15607		0.874891		0.994036
Garb_02136	105	28964	17.5	2	1	83.55	1e-71	gi|75154761	Pyridoxal biosynthesis protein PDX2	Arabidopsis thaliana	---		---		---
Garb_20760	105	69033	11.1	4	3	98.02	0	gi|9965899	cinnamate-4-hydroxylase	Gossypium arboreum	0.827815		0.94697		0.782473	*
Garb_19004	104	43853	9.5	2	2	97.97	0	gi|295687239	thiazole biosynthetic enzyme	Gossypium hirsutum	1.44092		1.81488	*	1.62075
Garb_03915	85	56862	9.1	3	3	88.53	0	gi|396578192	putative hydroxycinnamoyl CoA shikimate/quinate hydroxycinnamoyl transferase	Hibiscus cannabinus	0.644745		1.43266	*	1
cotton_GLEAN_10010274	85	89594	3.1	1	1	68.46	3e-108	gi|255541516	carbonyl reductase, putative	Ricinus communis]	0.830565		0.634921		0.719424
Garb_17743	84	72480	4.5	2	2	81.26	2e-22	gi|34921534	Probable aldehyde dehydrogenase	Linum usitatissimum	1.16009		0.757576	*	0.92081
cotton_GLEAN_10018274	84	41441	8.8	2	2	70.91	5e-39	gi|728987	Bark storage protein B OS=Populus deltoides	Populus deltoides	0.782473		0.732064	*	0.764526
Garb_03326	83	51772	13.3	3	3	99.39	0	gi|74273629	gibberellin 20-oxidase 1	Gossypium hirsutum	1.288		2.339	*	1.63132	*
Garb_15288	82	40530	17	4	4	99.31	2e-167	gi|211906514	lactoylglutathione lyase	Gossypium hirsutum	0.819001		1.01523		1.05932
cotton_GLEAN_10038085	77	80326	7.2	4	4	99.13	0	gi|378747844	polyphenol oxidase	Gossypium hirsutum	0.98912		1.75439	*	1.48148
Garb_19161	76	28737	10.2	2	2	100	8e-103	gi|295687229	chalcone isomerase	Gossypium hirsutum	1.11359		1.29199	*	1.18765
Garb_18580	73	40837	5.1	1	1	83.78	2e-09	gi|62120373	homoserine kinase	Solanum lycopersicum	1.7452		2.09644		1.97628
cotton_GLEAN_10004959	70	43382	12.4	4	2	53.46	2e-88	gi|255549080	Gibberellin 3-beta-dioxygenase, putative	Ricinus communis	0.457457		0.99108		0.658328
cotton_GLEAN_10006188	67	20840	15.8	2	2	51.97	1e-39	gi|122222407	Elicitor-responsive protein 1	Oryza sativa subsp. japonica	0.464037		1.04384		0.805153
Garb_29449	66	67422	4.2	2	2	72.93	1e-36	gi|7387627	Putative 3,4-dihydroxy-2-butanone kinase	Solanum lycopersicum	1.12994		1.0101		1.0917
Garb_07549	65	52480	4.6	1	1	79.01	0	gi|255550473	12-oxophytodienoate reductase opr, putative	Ricinus communis	0.708215		1.25628		0.963391
cotton_GLEAN_10000842	65	37825	12.6	3	1	95.74	3e-46	gi|95116526	ethylene inducible protein hever	Theobroma cacao	---		---		---
Garb_20016	65	59632	9.5	3	3	86.44	0	gi|255554698	homogentisate 1,2-dioxygenase, putative	Ricinus communis	0.637755		0.813008		0.629327	*
Garb_12159	63	58228	7.5	3	3	77.73	1e-107	gi|255566066	transferase, putative	Ricinus communis	0.558659		1.06724		0.772798
cotton_GLEAN_10030425	60	19578	9.5	1	1	74.47	9e-16	gi|347602498	Putative cytochrome c oxidase subunit 5b-like	Arabidopsis thaliana	1.2987		1.14155		1.23916
Garb_03335	59	57962	5.6	2	2	96.83	7e-29	gi|255291837	putative 3-dehydroquinate synthase	Diospyros kaki	1.02669		1.1655		1.10619
Garb_24621	59	39335	4.4	1	1	85.07	4e-100	gi|75119920	UPF0603 protein Os05g0401100, chloroplastic	Oryza sativa subsp. japonica	---		---		---
Garb_03193	59	33654	6.2	1	1	86.73	1e-45	gi|229473559	nucleoside diphosphate kinase II	Zea mays	---		---		---
Garb_24959	58	85751	2.4	1	1	36.72	5e-58	gi|166990670	Sterol 3-beta-glucosyltransferase	Neosartorya fumigata	---		---		---
Garb_00729	58	66872	2.5	1	1	82.89	5e-27	gi|19730970	phosphoethanolamine methyltransferase	Pseudotsuga menziesii	---		---		---
Garb_01440	56	62098	6.9	2	2	98.92	9e-167	gi|74273623	brassinosteroid biosynthetic protein DWARF1	Gossypium hirsutum	0.693963	*	0.855432		0.753012	*
Garb_29074	56	62351	5.9	2	2	83.16	2e-98	gi|357520233	Alcohol dehydrogenase-like protein	Medicago truncatula	0.777605		0.909918		0.845309	*
Garb_20235	56	72857	3	1	1	66.21	5e-111	gi|75311801	(+)-neomenthol dehydrogenase	Arabidopsis thaliana	---		---		---
Garb_39398	53	45489	3.1	1	1	53.77	5e-85	gi|356541687	PREDICTED: flavonol sulfotransferase-like	Glycine max	0.621118		0.420168		0.503271
Garb_24518	50	52957	5.8	1	1	82.09	9e-38	gi|83300489	Chorismate synthase, chloroplastic	Arabidopsis thaliana	---		---		---
cotton_GLEAN_10021608	49	76875	1.7	1	1	73.95	0	gi|118573061	Monosaccharide-sensing protein 2	Arabidopsis thaliana	---		---		---
cotton_GLEAN_10034568	49	36299	6.4	2	2	53.7	7e-31	gi|395406786	Putative inactive methylesterase 20	Arabidopsis thaliana	0.460617	*	0.814996		0.656168	*
Garb_22362	48	67422	2.2	1	1	84.98	0	gi|255548233	protoporphyrinogen oxidase, chloroplast precursor, putative	Ricinus communis	---		---		---
Garb_23215	48	44249	8.8	2	2	75	2e-146	gi|75263858	Diaminopimelate epimerase, chloroplastic	Arabidopsis thaliana	1.30039		1.44092		1.36612
cotton_GLEAN_10016576	48	64643	8.1	2	2	92.92	7e-44	gi|375152084	aldehyde dehydrogenase 7b, partial	Lolium perenne	---		0.929368		0.820345
Garb_20961	47	85570	1.9	1	1	61.26	0	gi|37081112	Nicastrin	Arabidopsis thaliana	0.904977		1.0582	*	0.983284
Garb_07299	45	164177	1.3	1	1	98.08	5e-145	gi|46488561	putative phosphoribosylformylglycinamidine synthase	Gossypium hirsutum	---		---		---
Garb_14651	43	101676	1.7	1	1	63.96	7e-156	gi|75318311	Probable pectinesterase/pectinesterase inhibitor 12	Arabidopsis thaliana	---		---		---
cotton_GLEAN_10017360	43	48149	7.8	2	2	80.62	8e-75	gi|358440851	agmatine deiminase	Linum usitatissimum	0.536193	*	0.98912	*	0.807754	*
Garb_20825	40	20484	6	1	1	100	6e-92	gi|211906464	dimethylmenaquinone methyltransferase	Gossypium hirsutum	1.08696		1.11235		1.08225
Garb_17591	40	50994	4.7	2	2	96.3	5e-24	gi|154269272	formate dehydrogenase, partial	Corchorus olitorius	0.762195		0.838223		0.783699
Garb_06998	39	78003	3.5	2	2	88.32	0	gi|255546341	malic enzyme, putative	Ricinus communis	1.20773		1.09769		1.1534
Garb_26016	38	44423	3.2	1	1	72.9	9e-135	gi|88683154	protein tyrosine phosphatase	Fagus sylvatica	---		---		---
cotton_GLEAN_10035117	37	53943	6.8	2	1	99.65	1e-170	gi|283488491	UDP-D-glucose dehydrogenase	Gossypium hirsutum	---		---		---
Garb_20610	36	88888	1.5	1	1	85.51	0	gi|269969643	Probable galactinol--sucrose galactosyltransferase 6	Arabidopsis thaliana	1.02564		1.27877		1.11235
cotton_GLEAN_10040180	36	16118	11.1	1	1	88	1e-20	gi|62526585	auxin-repressed protein-like protein ARP2	Manihot esculenta	---		---		---
Garb_12014	36	32122	4.2	1	1	75.89	1e-99	gi|356560963	PREDICTED: short-chain type dehydrogenase/reductase-like	Glycine max	---		---		---
Garb_12703	35	42302	7.4	2	2	77.42	5e-136	gi|465012	Uricase-2 isozyme 2	Canavalia lineata	0.517063		0.856898		0.66313
Garb_03206	34	11795	10.4	1	1	93.62	1e-47	gi|255540309	Brain protein, putative	Ricinus communis	---		---		---
Garb_22792	33	47510	5.3	1	1	92.44	8e-122	gi|41350583	putative adenosine kinase		---		---		---
Garb_20000	33	68908	5.2	2	1	86.7	0	gi|356524453	PREDICTED: monocopper oxidase-like protein SKU5-like	Glycine max	---		---		---
Garb_16496	33	67189	3.3	1	1	86.99	3e-101	gi|20140867	Threonine synthase, chloroplastic	Solanum tuberosum	---		---		---
Garb_01542	33	279642	0.9	1	1	95.42	1e-61	gi|359485961	PREDICTED: glutamate synthase [NADH], amyloplastic-like	Vitis vinifera	---		---		---
cotton_GLEAN_10030826	32	39629	4.8	1	1	98.41	2e-172	gi|74273312	epoxide hydrolase	Gossypium hirsutum	---		---		---
Garb_06272	31	48754	3.5	1	1	95.99	0	gi|33391719	transaldolase	Gossypium hirsutum	---		---		---
Garb_21694	31	219009	0.9	1	1	97.5	9e-16	gi|297791419	hypothetical protein ARALYDRAFT_917182	[Arabidopsis lyrata subsp. lyrata	---		---		---
cotton_GLEAN_10038520	30	43144	3.8	1	1	58.94	2e-107	gi|255539619	Gibberellin receptor GID1, putative	Ricinus communis	---		---		---
Garb_12670	30	73843	3	1	1	94.31	0	gi|169705	ATP:pyruvate phosphotransferase	Ricinus communis	---		---		---
cotton_GLEAN_10013574	29	66358	2.9	1	1	79.35	0	gi|255537431	AMP dependent CoA ligase, putative	Ricinus communis]	---		---		---
Garb_22869	29	63851	1.8	1	1	91.98	8e-113	gi|255585461	UDP-n-acteylglucosamine pyrophosphorylase, putative	Ricinus communis	---		---		---
cotton_GLEAN_10038630	27	66756	1.4	1	1	57.29	4e-151	gi|308191598	Vicianin hydrolase (Fragment)	Vicia sativa subsp. nigra	---		---		---
Garb_22091	25	100800	1.9	1	1	91.22	0	gi|1351920	Copper methylamine oxidase	Arthrobacter sp	---		---		---
					Transcription related (113)
Garb_33016	747	82511	17.8	8	2	89.66	6e-28	gi|262192741	poly(A)-binding protein	Nicotiana tabacum	0.913242		1.07991		1.002
cotton_GLEAN_10028288	556	81915	15.3	7	1	72.37	3e-23	gi|322510110	Polyadenylate-binding protein 5	Arabidopsis thaliana	0.554939	*	0.85034		0.757576
cotton_GLEAN_10030804	354	44392	27.8	5	1	82.2	8e-48	gi|327493261	putative DNA repair protein	Solanum nigrum	---		---		---
Garb_33332	328	46425	26.2	5	1	77.17	2e-102	gi|55976503	Putative DNA repair protein RAD23-3	Arabidopsis thaliana	---		---		---
Garb_28259	322	59356	15.3	5	5	97.62	4e-16	gi|75262442	Nuclear transcription factor Y subunit B-2	Arabidopsis thaliana	1.62075	*	1.301	*	1.51057	*
Garb_05001	302	22768	40.9	4	4	93.68	5e-46	gi|193872624	ST7-5-1, partial	Eutrema halophilum	0.677507		1.14811		0.93985
cotton_GLEAN_10011533	291	33031	23.7	4	1	97.5	4e-08	gi|1658271	nascent polypeptide associated complex alpha chain	Nicotiana tabacum	0.191865	*	0.867303		0.554939
Garb_35297	286	19027	46.2	5	5	97.9	3e-77	gi|33469564	polygalacturonase-inhibiting protein	Gossypium barbadense	1.86916		1.30208	*	1.48368
Garb_02469	280	24063	25.4	3	3	100	3e-47	gi|75278464	Histone H2B.3	Solanum lycopersicum	1.60256		1.25628	*	1.29702
Garb_11733	277	43549	21.1	6	6	77.08	5e-72	gi|3929368	Pre-mRNA-splicing factor SF2	Arabidopsis thaliana	1.30378		1.07066		1.28535	*
cotton_GLEAN_10040102	192	37748	17.9	4	2	86.49	3e-32	gi|145339839	AT hook motif DNA-binding family protein	Arabidopsis thaliana	0.722022		1.001		0.909091
Garb_09817	187	39275	13.4	3	3	85.8	3e-75	gi|475720	RNA-binding protein 3	Arabidopsis thaliana	1.04493		1.06724		0.985222
Garb_39976	184	14749	33	3	3	100	9e-40	gi|51315702	Histone H4	Chelidonium majus	1.00604		0.633312		0.796178
Garb_20335	175	30002	19.5	4	4	82.14	3e-36	gi|125575903	hypothetical protein OsJ_32627	Oryza sativa Japonica Group	0.652742		1.01317		0.810373
Garb_01763	171	30866	19.1	3	3	91.89	2e-11	gi|298540046	putative alpha NAC-like protein	Arabidopsis thaliana	0.874891		1.00604		0.906618
Garb_18208	166	34306	11.7	2	2	88.68	3e-20	gi|1177047	14 kDa zinc-binding protein	Zea mays	0.886525		0.793651		0.844595
Garb_17618	156	61235	12.2	4	4	96.97	3e-50	gi|190895944	casein kinase II regulatory subunit	Populus tremula	0.691563		1.18064		0.819001
Garb_09172	153	43083	8.5	2	2	69.77	5e-07	gi|73919938	Histone deacetylase HDT1	Solanum chacoense	0.868056		1.05042		0.98912
cotton_GLEAN_10013940	153	55442	8.1	3	3	77.5	1e-38	gi|82237740	RNA-binding protein with serine-rich domain 1	Danio rerio	1.76056		0.988142		1.32802	*
Garb_12534	149	45255	4.1	1	1	68.18	2e-06	gi|145358319	histone deacetylase HDT2	Arabidopsis thaliana	0.993049		0.899281		0.961538
cotton_GLEAN_10036531	136	91144	10.6	5	4	70.32	4e-82	gi|75327488	Nucleolin 2	Oryza sativa subsp. japonica	0.796178		1.41243	*	1.0101
Garb_00064	136	22656	30.8	4	4	92.31	5e-73	gi|151564277	SKP1 component-like 1	Humulus lupulus	0.85034		0.783699		0.811688
Garb_13524	133	104989	3.4	2	2	80.37	0	gi|122222656	Transcription factor BPE	Arabidopsis thaliana	0.479846		0.781861		0.65189
Garb_20582	133	137227	5.1	4	4	97.75	4e-98	gi|62319895	DEAD BOX RNA helicase RH15 - like protein	Arabidopsis thaliana	1.13766		0.791766		0.99108
Garb_33571	132	69030	14	5	5	98.11	0	gi|295687237	RNA helicase-like protein	Gossypium hirsutum	1.00604		0.796178	*	0.88968
Garb_07424	132	43938	4.8	1	1	67.03	5e-18	gi|224069776	histone deacetylase	Populus trichocarpa	0.710227	*	0.851789		0.799361	*
Garb_17528	131	49049	11.9	4	2	71.43	4e-07	gi|8928305	TATA-binding protein-associated factor 2N	Homo sapiens	0.901713		0.820345		0.84674
Garb_06884	128	53279	12.5	3	3	77.14	3e-25	gi|255588084	histone h1/h5, putative	Ricinus communis	1.25786		0.931099		1.05485
cotton_GLEAN_10036312	127	33161	18	4	4	50.62	7e-14	gi|52783335	Serine/arginine-rich splicing factor 2	Rattus norvegicus	1.6129	*	1.01523		1.24224	*
cotton_GLEAN_10030516	125	41912	17.2	3	3	87.5	5e-27	gi|229914872	putative F-box protein	Eutrema halophilum	0.956938		1.00908		1.0101
cotton_GLEAN_10028773	124	52073	9.3	3	1	76.21	5e-135	gi|75331668	Polyadenylate-binding protein RBP45C	Arabidopsis thaliana	1.27877		---		0.732601
Garb_24984	122	163086	5	5	2	76.53	3e-37	gi|124360887	VCS , related	Medicago truncatula	1.61551		1.24844		1.39276
cotton_GLEAN_10020924	121	47590	15.8	3	3	98.56	2e-55	gi|151368154	DNA binding protein-like protein, partial	Gossypium arboreum	0.595238	*	0.761615		0.74184	*
Garb_20202	109	93855	5.4	3	3	50	7e-11	gi|12230623	Ribonucleoprotein At2g37220, chloroplastic	Arabidopsis thaliana	1.24378		1.06157		1.13379
Garb_02471	107	23855	20.8	2	1	100	5e-38	gi|337733640	histone H2A	Citrus trifoliata	0.319898	*	0.739098		0.452284
Garb_01030	107	67667	3.2	1	1	82.08	0	gi|288558844	Pre-mRNA-processing factor 19 homolog 2	Arabidopsis thaliana	0.410341		0.75643		0.570776
Garb_28378	106	65127	8.2	3	1	78.01	9e-55	gi|63115359	KH domain-containing protein	Betula platyphylla	---		---		---
Garb_00045	104	27452	15.1	2	1	92.78	3e-39	gi|357483947	Scaffold attachment factor B1	Medicago truncatula	---		---		---
Garb_10582	102	43721	12	3	3	98.91	7e-105	gi|81910895	Splicing factor 3B subunit 4	Rattus norvegicus	0.714286	*	0.935454		0.862813
Garb_30070	96	35407	4.8	1	1	50.65	4e-76	gi|40218371	secretory laccase	Gossypium arboreum	0.766284		0.809717		0.791139
Garb_18711	88	65881	8.2	3	1	79.18	0	gi|225452863	PREDICTED: KH domain-containing protein At4g18375	Vitis vinifera]	---		---		---
Garb_11287	88	42183	8.6	3	3	83.5	8e-94	gi|356547577	PREDICTED: DAZ-associated protein 1-like	Glycine max	1.05485		0.783699		0.943396
Garb_29387	88	85874	3.1	1	1	86.75	9e-82	gi|75274409	Methyl-CpG-binding domain-containing protein 11 OS=Arabidopsis thaliana GN=MBD11 PE=1 SV=1	Arabidopsis thaliana	1.45773		0.927644		1.14416
Garb_10038	87	71087	2.6	1	1	89.23	1e-24	gi|3582779	peroxisomal targeting sequence 1 receptor	Nicotiana tabacum	1.11857		1.18483		1.14025
Garb_19528	85	95180	9.8	5	5	89	0	gi|3334349	Glycine--tRNA ligase 1, mitochondrial	Arabidopsis thaliana	0.837521		0.695894		0.770416
Garb_17754	84	38768	7.6	2	2	81.95	2e-97	gi|356508564	PREDICTED: protein SET-like	Glycine max	0.411692		0.595948		0.523286
Garb_02066	83	62078	3.5	1	1	84.09	1e-100	gi|255587140	Zeamatin precursor, putative	Ricinus communis	0.783699		1.22249		0.996016
cotton_GLEAN_10032111	79	112956	4	2	2	94.98	6e-118	gi|227202578	CCR4-NOT transcription complex subunit 3	Arabidopsis thaliana	1.93424		1.05263		1.3947
Garb_28801	78	46290	9.2	3	3	79.44	5e-109	gi|356517062	PREDICTED: polyadenylate-binding protein, cytoplasmic and nuclear-like	Glycine max	2.35849		0.820345		1.38696
Garb_27540	78	61558	3.9	1	1	77.23	2e-174	gi|359473301	PREDICTED: KH domain-containing protein At4g18375-like	Vitis vinifera	3.62319		1.47059		1.34953
Garb_27083	76	43472	14.5	3	3	93.75	1e-23	gi|81884469	Splicing factor 3A subunit 2	Rattus norvegicu	0.952381		0.944287		0.831255
Garb_00970	75	23909	7.5	1	1	63.16	2e-37	gi|341958560	RecName: Full=CASP-like protein POPTRDRAFT_820933	Populus trichocarpa	0.735835		0.507099		0.604961	*
Garb_12396	73	36135	12	2	1	91.3	3e-18	gi|255603771	DNA binding protein, putative	Ricinus communis	0.759878		0.641437	*	0.692521
Garb_06245	72	52162	7.8	3	1	93.42	2e-36	gi|356521678	putative DNA repair protein RAD23-1-like isoform 1	Glycine max	1.917	*	1.6835	*	1.75	*
Garb_15830	71	25683	14.7	2	1	76.61	5e-63	gi|300681244	Leucine-rich repeat extensin-like protein 5	Arabidopsis thaliana	---		---		---
cotton_GLEAN_10039945	65	47029	9.8	3	3	75.57	5e-155	gi|255547381	zinc finger protein, putative	Ricinus communis	0.630517		1.80505		0.798085
Garb_16223	65	43963	4.3	1	1	85.85	9e-174	gi|1176792	Uncharacterized protein yqjG	Ricinus communis	0.926784		0.940734		0.927644
Garb_31298	64	43496	10.8	2	2	89.47	2e-13	gi|121902	Histone H1.1	Arabidopsis thaliana	0.742942	*	0.823723		0.76864
Garb_22928	63	48551	6.5	2	2	82.07	6e-65	gi|3583482670.	RNA-binding protein Nova-1, partial	Medicago truncatula	1.11732		1.11483		1.07643
Garb_02220	62	21860	10.1	1	1	84.48	6e-20	gi|55976204	Transcription factor HY5	Solanum lycopersicum	2.5974	*	1.75231	*	2.10326	*
cotton_GLEAN_10005711	62	39647	12.7	3	1	72.08	3e-126	gi|73620991	Putative DNA repair protein RAD23-1	Arabidopsis thaliana	---		---		---
Garb_02575	60	67883	4.2	2	1	87.97	3e-60	gi|4586586	bZIP DNA binding protein	Cicer arietinum	---		---		---
Garb_05705	60	155911	2.8	3	2	75.89	0	gi|75335476	Enhancer of mRNA-decapping protein 4	Arabidopsis thaliana	0.786782		1.07411		0.952381
Garb_11123	59	21087	9.1	2	2	94.37	3e-32	gi|75318746	Serine/arginine-rich splicing factor RSZ22	rabidopsis thaliana	1.22699		1.67224	*	1.28535
Garb_38655	59	69304	6.4	3	2	85.47	2e-161	gi|74639015	FYVE-type zinc finger-containing protein C9B6.03	Schizosaccharomyces pombe	1.06724		0.807103		0.925926
Garb_00816	59	47377	4	1	1	83.56	1e-30	gi|4033468	Arginine/serine-rich-splicing factor RSP40	Arabidopsis thaliana	---		---		---
Garb_17540	57	159475	1.1	1	1	73.81	8e-99	gi|14587365	WRKY8	Oryza sativa Japonica Group	---		---		---
Garb_20527	57	75817	3.5	1	1	92.06	2e-27	gi|357464473	Splicing factor-like protein	Medicago truncatula	---		---		---
Garb_20050	56	16558	20.9	2	2	68.67	9e-28	gi|25090505	Glycine-rich RNA-binding protein 2, mitochondrial	Arabidopsis thaliana	1.16959		1.03627		1.10742
Garb_09186	55	30379	6.8	1	1	100	1e-06	gi|42733508	BRI1-KD interacting protein 123	Oryza sativa Japonica Group	0.444247		1.0142		0.654879
Garb_03587	55	51110	3.4	1	1	87.5	4e-53	gi|71535005	zinc finger Glo3-like protein	Medicago sativa	---		---		---
cotton_GLEAN_10021577	54	70617	3.3	1	1	72.35	0	gi|254814128	Somatic embryogenesis receptor kinase 1	Arabidopsis thaliana	---		---		---
cotton_GLEAN_10031051	53	96376	3.1	2	2	79.09	7e-43	gi|148887433	Probable splicing factor 3A subunit 1	Arabidopsis thaliana	0.715308		1.19332		0.95511
Garb_07106	51	63689	4.6	2	2	93	0	gi|255572963	dead box ATP-dependent RNA helicase, putative	Ricinus communis	1.00402		0.862069	*	0.930233
Garb_34634	49	72380	5.8	2	2	90.32	5e-156	gi|255568277	splicing factor u2af large subunit, putative	Ricinus communis	0.961538		0.880282		0.921659
Garb_03037	48	66232	3	1	1	100	2e-116	gi|317159569	DEAD/DEAH box helicase 8	Hevea brasiliensis	---		---		---
Garb_13102	47	78287	2.9	1	1	77.99	2e-120	gi|357447861	Transcription initiation factor IIF subunit alpha	Medicago truncatula	---		---		---
Garb_28064	47	61311	2.3	1	1	93.05	0	gi|1169494	Elongation factor Tu, chloroplastic	Glycine max	---		---		---
Garb_12006	47	67484	5.1	2	2	78.14	5e-83	gi|110740177	hypothetical protein	Arabidopsis thaliana	0.642674		0.819672		0.734754
Garb_08936	46	44688	3.4	1	1	63.83	1e-06	gi|217075062	B9SQJ2_RICCO Translation initiation factor	Ricinus communis	0.83612		0.875657		0.864304
Garb_16614	45	34251	3.8	1	1	93.51	1e-35	gi|224133758	histone H1	Populus trichocarpa	1.65837	*	2.18	*	1.846	*
Garb_14751	45	79480	2	1	1	66.67	2e-21	gi|122064615	RNA-binding protein Nova-1	Macaca fascicularis	1.96078		1.09051		1.47059
Garb_14281	44	46084	7.5	3	3	91.3	4e-21	gi|75334513	Serine/arginine-rich splicing factor RS2Z32	Arabidopsis thaliana	1.54799	*	1.17233		1.31234	*
Garb_01948	44	67703	3.9	1	1	84.78	1e-12	gi|33772115	transcriptional regulator	Malus	1.31234		0.862813		1.05263
cotton_GLEAN_10011795	43	46876	4.1	1	1	96	9e-15	gi|193237575	transcription factor AP2-EREBP	Lotus japonicus	---		---		---
Garb_11299	43	86217	2.5	1	1	88.24	4e-58	gi|2642602	GCN5 homolog	Arabidopsis thaliana	---		---		---
Garb_11633	40	49455	3.2	1	1	78.03	1e-60	gi|113367274	bZIP transcription factor bZIP93	Glycine max	---		---		---
Garb_23851	38	222074	0.9	1	1	82.45	0	gi|224137598	global transcription factor group	Populus trichocarpa	---		---		---
Garb_27910	38	64325	3	1	1	92.31	9e-133	gi|357476427	Urease accessory protein ureG	Medicago truncatula	---		---		---
Garb_10281	37	68830	3.9	1	1	70	4e-06	gi|122215429	Zinc finger CCCH domain-containing protein 13	Arabidopsis thaliana	---		---		---
Garb_20753	37	101236	2.5	1	1	91.11	1e-91	gi|295829330	AT2G47330-like protein	Neslia paniculata	---		---		---
cotton_GLEAN_10023325	37	89138	1.9	1	1	89.88	0	gi|2495256	FACT complex subunit SSRP1	Catharanthus roseus	---		---		---
Garb_00149	36	47256	2.4	1	1	74.59	2e-77	gi|75337056	Acidic leucine-rich nuclear phosphoprotein 32-related protein	Arabidopsis thaliana	---		---		---
Garb_13463	35	121299	1.7	1	1	93.33	0	gi|225448823	PREDICTED: splicing factor 3B subunit 3-like	Vitis vinifera	---		---		---
Garb_31782	35	96712	1.7	1	1	80.1	1e-80	gi|14190783	putative phloem transcription factor M1	Apium graveolens	---		---		---
Garb_18360	35	31515	5.7	1	1	83.02	1e-18	gi|75262408	Zinc finger CCCH domain-containing protein 52	Arabidopsis thaliana	---		---		---
cotton_GLEAN_10039305	35	88647	2.5	1	1	86.06	7e-76	gi|53791953	putative OsNAC7 protein	Oryza sativa Japonica Group	0.610128		1.07991		0.762777
Garb_07722	34	31041	5.1	1	1	75.3	7e-60	gi|75228574	Zinc finger CCCH domain-containing protein 14	Oryza sativa subsp. japonica	---		---		---
Garb_26935	34	26001	4.8	1	1	76.71	7e-37	gi|75319742	Glycine-rich RNA-binding protein blt801	Hordeum vulgare	---		---		---
Garb_18538	34	32903	4.8	1	1	89.69	1e-86	gi|255557727	arginine/serine-rich splicing factor, putative	Ricinus communis	---		---		---
Garb_32680	34	66210	2.4	1	1	72.53	7e-31	gi|295913122	transcription factor	Lycoris longituba	---		---		---
Garb_02623	33	13697	7.4	1	1	91.49	7e-18	gi|171451986	glycine-rich protein	Bruguiera gymnorhiza	---		---		---
Garb_17986	32	49742	3.2	1	1	80.68	2e-74	gi|113367148	bZIP transcription factor bZIP86	Glycine max	---		---		---
Garb_31161	31	22650	7.6	1	1	60.71	2e-48	gi|338227616	SKP1	Hevea brasiliensis	---		---		---
Garb_04008	30	150102	1.6	1	1	71.43	9e-06	gi|395406802	Pre-mRNA-processing protein 40A	Arabidopsis thaliana	---		---		---
Garb_22610	30	38594	4.1	1	1	82.4	2e-127	gi|133907524	AT-hook DNA-binding protein	Gossypium hirsutum	---		---		---
Garb_27690	29	34017	4.6	1	1	85.26	4e-47	gi|357481857	AT-hook DNA-binding protein	Medicago truncatula	---		---		---
Garb_17795	29	32274	5.5	1	1	94.34	9e-23	gi|297598040	RNA-binding protein 24	Oryza sativa Japonica Group	---		---		---
Garb_04359	27	64978	2	1	1	93.93	4e-120	gi|75321585	Zinc finger CCCH domain-containing protein 40	Oryza sativa subsp. japonica	2.77778		0.819001	*	1.68067	*
cotton_GLEAN_10019300	27	165672	2.1	2	1	96.6	6e-167	gi|380865454	U2 snRNP component prp10	Schizosaccharomyces pombe	---		---		---
cotton_GLEAN_10035867	25	85799	1.1	1	1	74.29	2e-11	gi|359484655	PREDICTED: zinc finger CCCH domain-containing protein 19-like	Vitis vinifera	---		---		---
Garb_02798	21	18154	8.8	1	1	98.33	2e-11	gi|27368046	zinc finger protein	Glycine max	---		---		---
Garb_01560	17	77156	2.4	1	1	75.44	3e-18	gi|15214341	KH domain-containing protein At4g18375	Arabidopsis thaliana	---		---		---
					Protein related (359)
					Protein synthesis (36)
cotton_GLEAN_10017501	476	69153	22	9	1	84.04	0	gi|133902301	putative protein disulfide isomerase	Gossypium hirsutum	0.433839		1.06496		0.771605
cotton_GLEAN_10025441	474	52038	34.6	9	1	98.2	7e-94	gi|289064666	S-adenosylmethionine synthase-like protein	Eperua falcata	0.29129	*	0.762195	*	0.536481	*
Garb_11969	371	83024	21.4	10	10	85.81	2e-64	gi|356550177	PREDICTED: protein disulfide isomerase-like 1-4-like isoform 2	Glycine max	0.4995	*	1.20482		0.914077
Garb_05129	349	58591	30.2	9	9	91.61	0	gi|255567660	elongation factor tu, putative	Ricinus communis	0.696379	*	1.63399	*	1.13636
Garb_16501	316	53257	23.2	7	7	96.9	1e-165	gi|386870481	elongation initiation factor 4A	Sesamum indicum	0.870322		0.87184		0.972763
Garb_02997	302	22498	32.4	4	2	95.93	4e-85	gi|194321208	cyclophilin	Gossypium hirsutum	0.55991		0.708215	*	0.665336
Garb_09322	273	32253	28.9	5	1	96.51	4e-43	gi|356516563	PREDICTED: elongation factor 1-delta-like	Glycine max	1.54799		0.967118		1.20773
Garb_17581	249	70463	14.7	6	1	99.39	0	gi|133902308	putative protein disulfide isomerase	Gossypium hirsutum	---		---		---
cotton_GLEAN_10007585	222	64632	17	6	6	93.38	5e-82	gi|255570962	elongation factor 1 gamma, putative	Ricinus communis	0.893655		1.13122		1.01523
cotton_GLEAN_10037597	137	54870	19.4	5	5	97.04	0	gi|341575453	protein disulfide isomerase	Gossypium hirsutum	0.859107		0.848896		0.865801
Garb_02151	132	88096	14	5	5	77.66	4e-36	gi|26454618	Molybdopterin biosynthesis protein CNX1	Arabidopsis thaliana	0.956023		1.47059		1.30548	*
Garb_19546	130	134659	6.5	5	5	86.65	0	gi|21542451	Alanine--tRNA ligase	Arabidopsis thaliana	1.29366		1.11483		1.18483
Garb_02116	123	31431	26	5	2	88.51	9e-40	gi|6015064	Elongation factor 1-delta	Pimpinella brachycarpa	1.67785		2.501	*	2.089	*
cotton_GLEAN_10029483	117	31561	23.9	4	1	90.8	3e-40	gi|386278566	elongation factor 1-beta	Vernicia fordii	---		---		---
cotton_GLEAN_10008951	102	60244	9.2	3	3	52.38	2e-132	gi|20178330	Aspartate--tRNA ligase, cytoplasmic	Homo sapiens	1.0352		0.954198		1.0352
Garb_30920	101	89244	4.3	2	2	96.15	5e-71	gi||10798642	lysyl-tRNA synthetase [Nicotiana tabacum]	Nicotiana tabacum	3.90625		1.31406		1.29702
Garb_18300	97	25894	15.2	2	2	96.24	2e-61	gi|165971819	cyclophilin	Ricinus communis	0.911577		1.41243		0.892061
Garb_04529	82	38074	17.7	4	4	74.83	5e-128	gi|255559496	phenazine biosynthesis protein, putative	Ricinus communis	0.814332		1.24533		1.02987
Garb_18034	58	94364	1.6	1	1	82.32	0	gi|225461914	PREDICTED: threonyl-tRNA synthetase, mitochondrial-like	Vitis vinifera	---		---		---
Garb_00906	55	72628	2.8	1	1	88.17	0	gi|255548247	prolyl-tRNA synthetase, putative	Ricinus communis	---		---		---
Garb_02841	42	74822	3.2	2	2	88.71	9e-26	gi|75115360	Protein disulfide isomerase-like 1-6	Arabidopsis thaliana	1.5748	*	2.17112		1.911
Garb_34538	38	126193	2.1	2	2	90.94	3e-125	gi|75305941	Alanine--glyoxylate aminotransferase 2 homolog 1, mitochondrial	Arabidopsis thaliana	1.20773		0.931099		1.05597
Garb_07071	38	113560	2.1	1	1	85.37	1e-13	gi|12230648	Probable methionine--tRNA ligase	Arabidopsis thaliana	---		---		---
Garb_06595	38	62754	2.6	1	1	93.72	0	gi|356523042	PREDICTED: probable plastidic glucose transporter 3-like	Glycine max	---		---		---
Garb_06138	37	31283	5.6	1	1	60.11	8e-64	gi|238692791	Elongation factor P	Synechococcus sp	---		---		---
Garb_00435	36	101827	1.8	1	1	87.85	0	gi|461999	Elongation factor G, chloroplastic	Glycine max	---		---		---
Garb_05834	35	141807	1.6	1	1	65.28	4e-22	gi|302837640	hypothetical protein VOLCADRAFT_104642	Volvox carteri f. nagariensis	---		---		---
Garb_17222	33	39357	3.4	1	1	90.8	3e-40	gi|62319313	eukaryotic translation initiation factor 3 subunit like protein	Arabidopsis thaliana	---		---		---
Garb_01105	32	121134	1.3	1	1	92.79	0	gi|62320053	elongation factor like protein	Arabidopsis thaliana	---		---		---
Garb_14851	32	91197	2.1	1	1	87.41	3e-71	gi|123358667	Cysteine--tRNA ligase	Burkholderia xenovorans	---		---		---
Garb_12794	32	118562	1.8	1	1	84.48	4e-56	gi|62321577	putative leucyl-tRNA synthetase	Arabidopsis thaliana	---		---		---
Garb_23027	30	244507	1.1	1	1	59.94	0	gi|32251003	Eukaryotic translation initiation factor 4G	Arabidopsis thaliana	---		---		---
Garb_11758	29	55602	2.7	1	1	93.28	0	gi|225446410	PREDICTED: tryptophanyl-tRNA synthetase, cytoplasmic	Vitis vinifera	---		---		---
Garb_03288	29	80962	2.9	1	1	74.83	0	gi|12644590	Probable phenylalanine--tRNA ligase beta subunit	Arabidopsis thaliana	---		---		---
cotton_GLEAN_10023666	28	34484	3.9	1	1	75.72	3e-108	gi|205830249	Alanine--tRNA ligase	Roseiflexus sp	---		---		---
Garb_25915	23	62743	2.6	1	1	97.75	9e-125	gi|255543443	eukaryotic peptide chain release factor subunit, putative	Ricinus communis	---		---		---
					Ribosomal protein (104)
Garb_13492	711	34617	37.7	6	3	77.37	2e-16	gi|1710624	Heterogeneous nuclear ribonucleoprotein A2 homolog 2	Xenopus laevis	1.04167		1.18064		1.11857
Garb_30887	360	14181	15	1	1	79.17	3e-15	gi|154269254	acidic ribosomal protein P3	Corchorus olitorius	1.59744	*	1.26422	*	1.38504	*
Garb_14354	304	23027	27.2	3	3	98.68	6e-74	gi|255566712	40S ribosomal protein S18, putative	Ricinus communis	1.58983	*	0.706215	*	0.905797
cotton_GLEAN_10018393	290	14393	57	4	2	90.32	1e-23	gi|225440938	60s acidic ribosomal protein	Prunus dulcis	0.728332		0.74184		0.749064
Garb_32910	285	14397	62.8	4	1	91.94	3e-24	gi|24473796	60S acidic ribosomal protein P2B	Vitis vinifera	0.652742	*	0.558347	*	0.594884	*
Garb_14028	278	28789	37.1	6	6	80.49	1e-71	gi|75266320	Deoxyuridine 5'-triphosphate nucleotidohydrolase	Arabidopsis thaliana	1.0142		1.4881	*	0.985222
cotton_GLEAN_10013978	225	81178	12.6	5	5	88.64	0	gi|250745	Formate--tetrahydrofolate ligase	Spinacia oleracea	0.773994		0.680272	*	0.722022
Garb_00094	220	29384	14.3	2	2	93.68	1e-102	gi|17380512	60S ribosomal protein L8-1	Arabidopsis thaliana	0.908265		0.984252		0.934579
Garb_06213	203	41744	19.4	6	6	100	1e-34	gi|305855865	40S ribosomal subunit associated protein	Rhododendron ovatum	0.884956		0.649773		0.695894
Garb_19952	196	42293	15.9	4	1	91.98	3e-95	gi|5923684	putative 60S acidic ribosomal protein, 5' partial	Arabidopsis thaliana]	0.570776		0.93985		0.755858
cotton_GLEAN_10032375	196	23083	25.3	3	1	98.28	1e-25	gi|1710530	60S ribosomal protein L27a-3	Arabidopsis thaliana	1.25628		0.913242		1.05374
Garb_28564	195	42323	18.1	4	1	91.88	8e-155	gi|225448367	60S acidic ribosomal protein P0	Vitis vinifera	---		---		---
Garb_00689	170	81549	2.3	1	1	93.06	1e-31	gi|359807542	40S ribosomal protein S25	Glycine max	0.409836	*	1.14811	*	0.762195
Garb_14267	169	64944	19.4	7	1	99.78	0	gi|74486732	translation elongation factor 1A-3	Gossypium hirsutum	---		---		---
Garb_10274	165	80653	6.2	3	3	89.61	0	gi|255540297	nucleolar protein nop56, putative	Ricinus communis	0.788022		1.0929	*	0.947867
cotton_GLEAN_10010309	163	24364	22.3	3	3	95.93	4e-62	gi|374412424	60S ribosomal protein L12	Wolffia australiana	1.43062	*	1.321		1.32979	*
Garb_03811	156	15283	17	1	1	97.8	6e-45	gi|6831602	60S ribosomal protein L37a	Gossypium hirsutum	1.26103		1.05708		1.18765
Garb_07442	142	21678	33.1	4	4	99.12	2e-51	gi|146454918	40S ribosomal protein S14	Sonneratia caseolari	0.938086		1.05932	*	0.962464
Garb_08746	137	122476	3.9	3	3	99.22	3e-71	gi|19884121	60S ribosomal protein L23	Arabidopsis thaliana	0.567859		1.17786		0.816327
Garb_02702	134	24425	20.3	3	3	100	3e-84	gi|49333381	putative ribosomal protein	Gossypium hirsutum	0.711238	*	0.932836		0.807754	*
Garb_07555	131	30372	9.3	2	2	90.87	3e-110	gi|75170994	40S ribosomal protein S3-3	Arabidopsis thaliana	1.31234		0.721501	*	0.95057
Garb_09377	127	10021	32	2	2	97.1	2e-31	gi|225440849	PREDICTED: probable small nuclear ribonucleoprotein G	Vitis vinifera	1.34228		0.881057		0.937207
cotton_GLEAN_10023382	126	36854	20	4	4	80.62	8e-111	gi|255558037	nucleic acid binding protein, putative	Ricinus communis	0.860585		0.814996		0.956938
Garb_20092	125	32001	11.7	2	1	93.51	8e-36	gi|32401104	60S ribosomal protein	Kandelia candel]	1.23305	*	0.87184		1.01937
Garb_24126	120	19532	36.3	4	4	96	5e-41	gi|255551787	60S ribosomal protein L22, putative	Ricinus communis	1.84843		0.816993		1.20337
Garb_36269	120	43289	15.3	4	3	82.93	1e-156	gi|23503072	Eukaryotic translation initiation factor 3 subunit I	Arabidopsis thaliana	0.505051	*	0.817		0.666	*
Garb_01663	118	18087	9.8	1	1	92.62	6e-60	gi|75266342	40S ribosomal protein S20-2	Arabidopsis thaliana	2.57	*	1.75439	*	2.103	*
Garb_08958	111	37686	10.8	2	1	90.37	1e-114	gi|75305702	40S ribosomal protein S2-2	Arabidopsis thaliana	0.453721		---		0.380518
cotton_GLEAN_10035382	108	33632	33.2	6	6	98.23	1e-47	gi|148807168	putative 40S ribosomal protein S8	Prunus dulcis	0.666667		1.18343		0.984252
Garb_28667	107	20187	37.9	5	4	90.68	2e-59	gi|74231020	40S ribosomal protein S19	Solanum peruvianum	1.44509		0.847458		1.06952
Garb_00413	103	29652	13.8	2	1	86.73	2e-92	gi|266945	60S ribosomal protein L9	Pisum sativum	1.28041	*	0.582411	*	0.854701	*
Garb_09400	101	22520	19.3	3	2	74.19	2e-20	gi|730583	60S acidic ribosomal protein P2	Parthenium argentatum	0.572082		0.786164		0.706714
Garb_29307	99	17638	21.8	2	2	88.3	2e-40	gi|17865566	60S ribosomal protein L36-3	Arabidopsis thaliana	1.34		2.211	*	1.743	*
Garb_03766	93	37386	12.2	3	3	61.28	1e-87	gi|75146011	UBA and UBX domain-containing protein At4g15410	Arabidopsis thaliana	0.86881		1.26103		1.07991
Garb_00264	92	44588	8.4	2	2	84.48	2e-132	gi|55976189	60S ribosomal protein L5	Cucumis sativus	0.690608	*	1.00301		0.846024	*
Garb_06110	88	35403	21.3	4	4	96.31	5e-122	gi|1173256	40S ribosomal protein S	Gossypium hirsutum	1.20048		1.00806		1.06952
Garb_07843	81	22686	11.2	1	1	98.85	5e-44	gi|6624737	ribosomal protein S15	Pisum sativum	1.37741		0.857633	*	1.0352
Garb_07180	80	23126	14.1	2	2	86.67	6e-58	gi|3123264	60S ribosomal protein L27-3	Arabidopsis thaliana	0.732601		0.934579		0.808407
Garb_22666	80	14094	14	1	1	72.58	3e-19	gi|110287815	60S acidic ribosomal protein P1-1	Arabidopsis thaliana	1.26263	*	0.957854		1.08814
Garb_01374	79	56017	13.7	5	5	62.2	3e-130	gi|75571439	Obg-like ATPase 1	Gallus gallus	1.99203	*	1.35501		1.44928	*
Garb_09241	78	22829	7.4	1	1	95.08	6e-20	gi|22096379	40S ribosomal protein S30	Arabidopsis thaliana	0.376	*	1.008		0.674	*
Garb_10044	78	27070	6.6	1	1	92.35	3e-99	gi|18203445	60S ribosomal protein L10	Vitis riparia	0.632911		0.777001		0.665779
Garb_34684	77	32023	11.7	2	1	93.51	8e-36	gi|32401104	60S ribosomal protein	Kandelia candel	---		---		---
Garb_17277	75	37673	11.8	3	1	86.41	3e-87	gi|6094021	60S ribosomal protein L18	Cicer arietinum	---		---		---
cotton_GLEAN_10015716	73	45081	11.1	3	3	95.96	2e-52	gi|124359357	Quinonprotein alcohol dehydrogenase-like	Medicago truncatula	0.831255		0.771605		0.803859
Garb_03208	71	38678	10	2	1	91.95	7e-42	gi|27735241	60S ribosomal protein L17-2	Arabidopsis thaliana	---		---		---
Garb_05053	70	41823	5.6	1	1	96.63	3e-42	gi|299829978	ribosomal s6 RPS6-2 family protein, partial	Medicago truncatula	0.489956		0.565291	*	0.514403
Garb_24597	70	30688	14.4	2	2	96.89	7e-77	gi|225431804	60S ribosomal protein L19-2	Vitis vinifera	0.926784		1.56986	*	1.18483
Garb_14491	66	29313	4.9	1	1	93.88	2e-133	gi|255583438	translation initiation factor, putative	Ricinus communis	2.03666		1.50376		1.70358
Garb_40696	66	58755	4.1	1	1	60.06	7e-37	gi|73621113	UBX domain-containing protein 7	Homo sapiens	---		---		---
Garb_06692	66	23526	6.8	1	1	87.37	2e-43	gi|109940154	40S ribosomal protein S10	Oryza sativa subsp. japonica	0.857633		0.896861		0.858369
Garb_00300	65	9062	18.5	1	1	88.24	2e-19	gi|1173237	40S ribosomal protein S28	Zea mays	0.711238		0.98912		0.883392
Garb_29075	65	44167	12.2	3	3	72.79	2e-90	gi|19884091	U2 small nuclear ribonucleoprotein A'	Arabidopsis thaliana	2.73224		0.574053		1.31234
Garb_11743	61	27921	17.1	3	1	86.1	2e-92	gi|21431838	60S ribosomal protein L18-2	Arabidopsis thaliana	---		---		---
cotton_GLEAN_10015490	61	23560	14.6	2	2	98.01	3e-80	gi|255541262	40S ribosomal protein S13, putative	Ricinus communis	1.97239		0.934579		1.4245
Garb_09975	58	18460	22.3	2	1	100	4e-43	gi|357444391	40S ribosomal protein S15a, partial	Medicago truncatula	---		---		---
Garb_21794	58	39115	8.8	2	2	78.48	3e-79	gi|464621	60S ribosomal protein L6	Mesembryanthemum crystallinum	0.925926		1.56495	*	1.0627
Garb_07095	57	24303	6.7	1	1	86.67	4e-72	gi|89258491	putative ribosomal protein L28	Gossypium hirsutum	0.839631		1.18343		0.99108
Garb_18738	56	45835	20.8	4	1	94.87	9e-15	gi|22759731	putative 40S ribosomal protein S3A	Zinnia elegans	0.77821		0.914913		0.820345
Garb_04128	56	71773	2.3	1	1	83.23	0	gi|356534706	PREDICTED: U4/U6 small nuclear ribonucleoprotein PRP4-like protein-like	Glycine max	1.67785		0.778816		1.12486
Garb_08784	55	34045	10.3	3	3	73.89	2e-89	gi|75309179	40S ribosomal protein S9-2	Arabidopsis thaliana	1.66945		0.977517		1.16686
Garb_37025	54	44323	8.6	2	2	84.08	8e-138	gi|55976189	60S ribosomal protein L5	Cucumis sativus	0.520021		0.98912		0.669792
Garb_33847	52	41553	9.2	2	1	97.06	7e-42	gi|209967437	60S ribosomal protein L17	Vernicia fordii	---		---		---
Garb_23587	51	19002	16.7	2	2	95.79	2e-47	gi|730558	60S ribosomal protein L34	Nicotiana tabacum	1.30378		1.02669		1.16686
Garb_31026	51	58140	11.4	3	3	86.5	0	gi|17367847	60S ribosomal protein L4	Prunus armeniaca	0.517063		1.11607		0.724638
Garb_13490	50	28023	6.6	1	1	76.11	3e-80	gi|547713	Eukaryotic translation initiation factor 4E-2	Triticum aestivum	---		---		---
cotton_GLEAN_10019677	49	39945	24	4	1	90.69	5e-107	gi|269969547	40S ribosomal protein S3a-2	Vitis vinifera	---		---		---
Garb_07281	49	28098	6.2	1	1	100	6e-20	gi|1362117	ribosomal protein S5 homolog - common tobacco (fragment)	Gossypium hirsutum	1.36054		1.06045		1.20192
Garb_11368	48	17191	30.4	3	3	100	6e-60	gi|313586489	60S ribosomal protein L35aA	Hevea brasiliensis	0.812348		0.745712		0.775194
Garb_09105	46	44336	4.1	1	1	65.33	3e-10	gi|30316379	29 kDa ribonucleoprotein, chloroplastic	Arabidopsis thaliana	---		---		---
Garb_00657	45	21503	5.5	1	1	96.43	6e-74	gi|225428853	40S ribosomal protein S16	Vitis vinifera	---		---		---
Garb_10205	44	28556	6.1	1	1	60.19	2e-65	gi|38258307	Single-stranded DNA-binding protein, mitochondrial	Arabidopsis thaliana	---		---		---
Garb_10228	43	12529	20	1	1	100	2e-23	gi|357446941	Ribosomal protein S27	Medicago truncatula	---		---		---
Garb_01107	43	77065	2.6	1	1	92.94	9e-40	gi||10444370	60S ribosomal protein L10A, partial	Phaseolus coccineus	---		---		---
Garb_23467	41	32314	12.1	2	2	97.3	5e-15	gi|148283610	ribosomal protein L13A	Lupinus luteus	1.4771		0.862813	*	1.11732
Garb_16569	40	31894	6.8	1	1	89.64	6e-100	gi|255565958	50S ribosomal protein L3, putative	Ricinus communis	1.11982		1.31406		1.24533
Garb_15060	39	41401	5.7	1	1	95.7	7e-37	gi|225434351	40S ribosomal protein S26-2-like	Vitis vinifera	---		---		---
Garb_01081	39	38091	9.5	2	2	85.42	8e-95	gi|38503370	60S ribosomal protein L7-4	Arabidopsis thaliana	1.0661		0.932836		0.982318
Garb_17892	38	18909	8.8	1	1	65.15	4e-45	gi|73921135	Uncharacterized protein At4g28440	Arabidopsis thaliana	---		---		---
Garb_07031	38	29733	4.2	1	1	50	5e-08	gi|338818070	Translation machinery-associated protein 22	Arabidopsis thaliana	---		---		---
cotton_GLEAN_10005668	38	48959	5	2	2	89.47	3e-12	gi|255568695	UBX domain-containing protein, putative	Ricinus communis	1.5949		1.26582		1.40252
Garb_07231	37	51661	3	1	1	75.15	1e-137	gi|255554923	nuclear acid binding protein, putative	Ricinus communis	---		---		---
Garb_02218	37	104481	3.5	3	1	87.01	5e-72	gi|189313738	translation initiation factor eIF(iso)4G	Prunus persica	---		---		---
Garb_05610	37	32512	5.3	1	1	92.16	8e-13	gi|312063636	60S ribosomal protein L13	Quercus ilex	---		---		---
Garb_05465	35	20339	7.7	1	1	92.19	1e-62	gi|255578615	40S ribosomal protein S17, putative	Ricinus communis	---		---		---
Garb_12002	32	61036	1.9	1	1	96.54	0	gi|356525780	PREDICTED: eukaryotic translation initiation factor 2 subunit 3	Glycine max	---		---		---
Garb_19078	32	56367	4.2	1	1	96.03	3e-65	gi|307136061	40S ribosomal protein s24	Cucumis melo subsp. melo	---		---		---
Garb_01423	32	18000	7.6	1	1	98.97	9e-50	gi|356513032	PREDICTED: probable small nuclear ribonucleoprotein Sm D2-like	Glycine max	---		---		---
Garb_25356	31	37911	4.9	1	1	79.7	3e-104	gi|17865761	Eukaryotic translation initiation factor 2 subunit beta	Malus domestica	---		---		---
Garb_07257	31	24550	4.9	1	1	88.41	5e-84	gi|2851508	60S ribosomal protein L21-1	Arabidopsis thaliana	---		---		---
Garb_38540	31	52074	5.4	1	1	62.05	1e-111	gi|7388552	Uncharacterized protein At2g24330	Arabidopsis thaliana	---		---		---
Garb_07600	31	59431	2.9	1	1	92.81	3e-73	gi|71534892	putative translation initiation facto	Medicago sativa	---		---		---
Garb_02231	30	24508	6.2	1	1	91.3	7e-73	gi|1173223	40S ribosomal protein S11	Glycine max	---		---		---
Garb_02928	30	43887	4.2	1	1	91.05	3e-118	gi|548774	60S ribosomal protein L7a	Oryza sativa subsp. japonica	---		---		---
Garb_10585	30	63879	3.4	1	1	84.96	2e-88	gi|84468434	putative U1 snRNP 70K protein	Trifolium pratense	---		---		---
Garb_05620	30	21530	7.7	1	1	99.14	1e-50	gi|225454422	PREDICTED: eukaryotic translation initiation factor 1A-like	Vitis vinifera	---		---		---
Garb_00243	30	71476	1.7	1	1	92.65	3e-30	gi|224980058	COSII_At1g73180, partial	Solanum cheesmaniae	---		---		---
Garb_07777	29	99677	1.8	1	1	81.22	0	gi|6685536	Eukaryotic translation initiation factor 3 subunit B	Nicotiana tabacum	---		---		---
Garb_01629	29	73396	2.7	1	1	98.18	6e-25	gi|6094014	60S ribosomal protein L15	Petunia hybrida	---		---		---
Garb_26920	28	102260	3.5	3	1	88.96	2e-74	gi|189313740	translation initiation factor eIF(iso)4G	Prunus persica	---		---		---
cotton_GLEAN_10025335	26	19546	9.9	1	1	95	2e-47	gi|225445005	60S ribosomal protein L31	Vitis vinifera	---		---		---
Garb_23932	26	109969	1.5	1	1	82.91	0	gi|255557558	nuclear pore complex protein nup93, putative	Ricinus communis	---		---		---
Garb_11893	26	17005	14.4	1	1	83.53	3e-34	gi|289584353	ribosomal protein S12-like protei	Bauhinia guianensis	---		---		---
Garb_13828	22	19213	4.2	1	1	84.07	1e-49	gi|21362875	60S ribosomal protein L18a-3	Arabidopsis thaliana	---		---		---
					Protein folding and transporting (92)
Garb_12714	976	87719	32.8	13	1	99.38	0	gi|211906494	heat shock protein 70	Gossypium hirsutum	0.528		0.78125	*	0.654	*
Garb_21426	972	87778	37.2	15	1	100	0	gi|211906504	heat shock protein 70	Gossypium hirsutum	0.692042		0.659631		0.675	*
cotton_GLEAN_10000235	941	87792	37.2	15	2	100	0	gi|211906498	heat shock protein 70	Gossypium hirsutum	0.856898		0.848896		0.838223
Garb_04100	854	89042	29.7	14	8	92.37	0	gi|399940	Heat shock 70 kDa protein, mitochondrial	Phaseolus vulgaris	1.01833		0.912409		1.03413
Garb_09148	660	87693	35.3	14	2	100	0	gi|211906496	heat shock protein 70	Gossypium hirsutum	0.582411	*	0.742942		0.688705
Garb_14728	652	73857	38.6	16	1	90.22	0	gi|255560267	chaperonin-60kD, ch60, putative	Ricinus communis	---		---		---
cotton_GLEAN_10016615	644	76805	36.3	16	1	89.91	0	gi|24637539	heat shock protein 60	Prunus dulcis	---		---		---
Garb_04857	615	56301	15.3	4	4	82.13	2e-126	gi|219687002	daikon cysteine protease RD21	Raphanus sativus	1.28041		0.81103		1.01833
Garb_09221	514	74729	31.6	14	1	93.68	0	gi|255554262	chaperonin-60kD, ch60, putative ]	Ricinus communis	---		---		---
cotton_GLEAN_10017510	511	77825	30.4	14	1	93.51	0	gi|461736	RecName: Full=Chaperonin CPN60-2, mitochondrial	Cucurbita cv	---		---		---
Garb_37318	467	87547	23.9	9	3	89.21	0	gi|399940	Heat shock 70 kDa protein, mitochondrial	Phaseolus vulgaris	0.933707		1.08108		1.00806
Garb_38057	444	90340	24.6	10	2	94.35	0	gi|13398537	BiP-isoform D	Glycine max	0.823723		0.760456		0.896057
cotton_GLEAN_10040110	426	85902	22.5	11	6	90	4e-13	gi|359497489	PREDICTED: LOW QUALITY PROTEIN: heat shock protein STI-like	Vitis vinifera	0.578035	*	0.959693		0.775194	*
Garb_00268	417	92550	24.9	12	1	93.55	0	gi|1708311	Stromal 70 kDa heat shock-related protein, chloroplastic	Spinacia oleracea	---		---		---
Garb_16790	414	14905	14.3	1	1	88.18	9e-45	gi|357445945	Peptidyl-prolyl isomerase FKBP12	Medicago truncatula	0.900901		1.05152		1.07991
Garb_05709	409	105552	21	13	1	96	0	gi|356552478	PREDICTED: heat shock cognate protein 80-like	Glycine max	1.21951	*	1.0142		1.08108
cotton_GLEAN_10022118	395	105491	18.3	11	1	94.87	0	gi|351726363	heat shock protein 90-1	Glycine max	0.734754		0.669344		0.694927
cotton_GLEAN_10008532	378	51227	30	9	9	79.59	4e-159	gi|255538432	Protein Z, putative	Ricinus communis	0.978474		1.25945	*	1.10254
cotton_GLEAN_10037472	345	93168	20	9	4	64.29	0	gi|255538260	Cucumisin precursor, putative	Ricinus communis	0.665779		1.23762		0.992063
cotton_GLEAN_10011002	344	22054	25.8	3	2	90.16	4e-60	gi|225469328	PREDICTED: FK506-binding protein 2-1	Vitis vinifera	1.0661		1.12613		1.09649
Garb_04759	304	71044	22.3	9	1	93.06	6e-127	gi|166574	60-kDa chaperonin-60 alpha-polypeptide, partial	Arabidopsis thaliana	---		---		---
cotton_GLEAN_10033440	270	14888	60.7	5	4	87.5	7e-45	gi|15637350	glutaredoxin	Tilia platyphyllos	1.02041		0.942507		0.979432
Garb_17565	257	110173	19.8	11	4	86.36	3e-96	gi|327493235	70 kDa heat shock protein	Solanum nigrum	1.15741		1.11857		0.738007
Garb_13618	255	88470	14.6	6	1	94.48	0	gi|255543359	heat shock protein, putative	Ricinus communis	---		---		---
Garb_30479	240	52064	19.1	4	1	84.86	6e-107	gi|255576447	uv excision repair protein rad23, putative	Ricinus communis	0.867303		1.01112		0.97371
Garb_10473	237	35091	26.5	5	4	89.11	2e-116	gi|21780187	cp10-like protein	Gossypium hirsutum	0.972763		1.18064	*	1.10619
Garb_16511	236	61251	16.9	4	1	95.71	7e-32	gi|4097575	NTFP1, partial	Nicotiana tabacum	2.1978		1.56986		1.84162
Garb_22598	229	55190	22.4	7	1	67.93	7e-105	gi|75309208	Protein TIC 40, chloroplastic	Arabidopsis thaliana	1.40252	*	1.49477		1.42248	*
Garb_08674	224	116099	13.8	8	7	86.33	0	gi|462013	Endoplasmin homolog	Catharanthus roseus	0.814996		0.915751		0.919963
Garb_20970	209	111804	22.3	11	2	73.04	0	gi|378548352	Heat shock 70 kDa protein 15	Arabidopsis thaliana	1.85529		1.47275		1.63666
Garb_17506	174	67291	19.6	7	7	68.53	0	gi|82233791	T-complex protein 1 subunit eta	Gallus gallus	1.11982		0.826446		0.943396
Garb_01270	168	90652	8	4	1	84.38	5e-84	gi|32130267	Peptidyl-prolyl cis-trans isomerase CYP20-2	Arabidopsis thaliana	---		---		---
Garb_11199	167	21479	17.6	2	1	88.98	8e-61	gi|255587693	fk506-binding protein, putative	Ricinus communi	---		---		---
Garb_09987	158	120919	8.2	5	1	89.22	0	gi|1168972	ATP-dependent Clp protease ATP-binding subunit clpA homolog	Brassica napus	---		---		---
Garb_31419	152	113988	3	2	1	80.95	2e-57	gi|47026902	nucleoporin	Hyacinthus orientalis	1.00705		0.709723		0.833333
cotton_GLEAN_10036605	150	33796	22	4	1	71.43	4e-13	gi|32130450	Peptidyl-prolyl cis-trans isomerase TLP20	Spinacia oleracea	---		---		---
Garb_03277	149	70057	10.3	4	4	94.01	0	gi|225451999	PREDICTED: T-complex protein 1 subunit zeta	Vitis vinifera	1.72414	*	0.814332		1.05374
cotton_GLEAN_10011507	149	124490	14.1	9	9	79.37	0	gi|2245020	growth regulator like protein	Arabidopsis thaliana	0.680735	*	1.33511	*	0.995025
Garb_22437	147	70395	14.8	6	3	93.25	0	gi|255558769	chaperonin containing t-complex protein 1	Ricinus communis	1.26263		1.09769		1.02459
Garb_20054	136	59691	17.2	4	1	92.11	0	gi|461944	DnaJ protein homolog	Cucumis sativus	---		---		---
Garb_09030	132	101857	5.5	4	2	75	3e-19	gi|47497348	epsin-like	Oryza sativa Japonica Group	1.62075		1.17371		1.35501
cotton_GLEAN_10016664	129	83859	4.8	3	3	87.08	2e-105	gi|255541132	structural constituent of nuclear pore, putative	Ricinus communis	2.89855	*	1.05374		1.68	*
cotton_GLEAN_10007601	118	44541	15.1	3	1	97.92	3e-49	gi|4210948	DnaJ protein	Hevea brasiliensis	---		---		---
Garb_05494	115	134318	4.7	4	3	79.34	1e-49	gi|375152098	putative nucleotide binding protein, partial	Lolium perenne	0.664894	*	0.970874		0.81367	*
Garb_19786	114	101797	5.8	4	4	90.57	3e-20	gi|159163239	Chain A, Solution Structure Of Rsgi Ruh-011, A Uba Domain From Arabidopsis Cdna	Arabidopsis thaliana	0.504032		0.88574		0.755858
Garb_02346	113	68073	16	5	5	94.06	2e-117	gi|154269260	chaperonin	Corchorus olitorius	0.792393	*	0.88968		0.877963
Garb_16582	99	44211	4.7	1	1	87.76	2e-18	gi|52782942	Protein grpE	Thermosynechococcus elongatus	0.881834		2.21239		1.05042
Garb_06759	96	29341	14.4	2	2	62.59	2e-46	gi|49176600	Hsp2	Cucumis melo	1.33156	*	0.896861		1.10375
Garb_37840	94	66387	9.1	2	2	75.61	3e-55	gi|82125332	Signal peptide peptidase-like 2B	Gallus gallus	0.855432		1.07643		1
cotton_GLEAN_10028977	89	76082	8.4	4	4	59.25	0	gi|117949833	T-complex protein 1 subunit gamma	Xenopus laevis	2.176	*	1.184		1.578	*
Garb_20964	84	34737	14	3	3	85.79	9e-100	gi|75273382	NifU-like protein 4	Arabidopsis thaliana	1.38504		1.06952		1.0929
Garb_32049	77	97053	6.7	4	4	88.89	1e-49	gi|2160319	SS652	Oryza sativa	1.31234		1.0846		1.16279
Garb_20633	73	41762	8.2	2	2	92.96	4e-32	gi|149392773	hypersensitive-induced response protein	Oryza sativa Indica Group	0.613497		0.591716		0.609756
cotton_GLEAN_10000785	71	124299	4.6	4	4	81.16	0	gi|225461570	PREDICTED: protein transport protein Sec24-like At3g07100-like	Vitis vinifera	1.43062	*	0.925926		1.16414
Garb_16708	70	110959	3.5	2	1	89.89	0	gi|255547031	heat shock protein, putative	Ricinus communis	---		---		---
cotton_GLEAN_10035746	68	78542	11	4	1	86.96	4e-51	gi|3334138	Calnexin homolog	Glycine max	0.707214		1.443		1.15207
Garb_14723	67	23301	12.6	2	1	71.72	5e-39	gi|122063508	Monothiol glutaredoxin-S10	Oryza sativa subsp. japonica	---		---		---
Garb_05751	66	14024	26.8	2	2	78.35	7e-40	gi|5921735	10 kDa chaperonin	Brassica napus	0.882613		1.21065		1.0582
Garb_07114	65	74417	7.5	3	2	84.09	0	gi|356522190	PREDICTED: chaperonin CPN60-like 2, mitochondrial-like	Gossypium hirsutum	0.630517		0.513875		0.566893
Garb_13944	63	170487	4.8	5	5	56.05	0	gi|71153243	Cucumisin	Cucumis melo	1.13507		1.27714		1.11483
Garb_02747	59	42641	12.7	3	3	87.04	5e-138	gi|211906448	alpha-soluble NSF attachment protein	Gossypium hirsutum	0.892857		0.615385	*	0.671592
Garb_09464	59	23140	7.8	1	1	83.83	5e-84	gi|255542578	microsomal signal peptidase 23 kD subunit, putative	Ricinus communis	---		---		---
Garb_30339	57	29293	3.8	1	1	68.87	4e-73	gi|6014889	Peptidyl-prolyl cis-trans isomerase	Vicia faba	1.05042		1.10011		1.06838
Garb_23250	56	23765	7.5	1	1	62.15	3e-51	gi|74656814	Peptidyl-prolyl cis-trans isomerase-like 1	Emericella nidulans	0.798722		0.910747	*	0.861326
Garb_04424	50	27276	7.1	1	1	88.98	4e-64	gi|75120039	Peptide methionine sulfoxide reductase B3	Oryza sativa subsp. japonica	1.00604		1.29534		1.18064
Garb_20544	49	26009	12.1	2	2	76.17	3e-95	gi|166899091	Protein-L-isoaspartate O-methyltransferase	Arabidopsis thaliana	0.638978		0.94697		0.841043
Garb_07053	48	95866	1.8	1	1	95.65	8e-32	gi|158512648	Protein transport protein sec23	Neosartorya fischeri	---		---		---
Garb_23798	48	26159	6.3	1	1	84.75	1e-53	gi|267120	Thioredoxin F-type, chloroplastic	Pisum sativum	---		---		---
Garb_15229	47	131012	2.4	2	2	75.38	0	gi|255550688	exocyst componenet sec8, putative	Ricinus communi	1.58479		0.996016		1.24224
Garb_01480	47	30584	4.8	1	1	98.68	6e-125	gi|158512763	RecName: Full=Chalcone--flavonone isomerase	Gossypium hirsutum	---		---		---
Garb_19543	46	51579	3.4	1	1	74.78	3e-06	gi|75315310	17.6 kDa class I heat shock protein 1	Arabidopsis thaliana	---		---		---
Garb_04717	44	41601	3.5	1	1	82.05	6e-70	gi|357494693	GrpE protein-like protein	Medicago truncatula	---		---		---
Garb_10578	44	83400	1.7	1	1	87.5	4e-20	gi|356506608	PREDICTED: T-complex protein 1 subunit gamma-like	Glycine max	0.581734		0.824402		0.713776
Garb_30019	43	86747	1.8	1	1	83.49	0	gi|73919362	Peptidyl-prolyl cis-trans isomerase FKBP62	Arabidopsis thaliana	---		---		---
Garb_10247	41	54772	2.9	1	1	70.97	2e-144	gi|67462408	Chaperone protein dnaJ 10	Arabidopsis thaliana	---		---		---
Garb_01800	41	85288	2	1	1	76.31	0	gi|255555803	Cucumisin precursor, putative	Ricinus communis	---		---		---
Garb_12210	41	21881	8.3	1	1	86.05	9e-59	gi|255559796	prefoldin subunit, putative	Ricinus communis	---		---		---
Garb_07418	40	17237	10.6	1	1	89.29	3e-37	gi|21542453	Tubulin-specific chaperone A	Arabidopsis thaliana	---		---		---
Garb_13672	38	28204	4.1	1	1	78.24	2e-92	gi|255575861	Glycolipid transfer protein, putative	Ricinus communis	3.15457	*	1.15207	*	1.97239	*
Garb_15446	37	55805	3.7	1	1	91.41	2e-158	gi|16265863	suppressor of K+ transport growth defect-like protein	Musa acuminata AAA Group	---		---		---
cotton_GLEAN_10027851	37	27155	11.8	2	2	88.73	3e-108	gi|29469000	peptide methionine sulfoxide reductase	Gossypium barbadense	1.28866	*	1.1919		1.24378
Garb_31520	36	71605	8	2	2	66.06	9e-36	gi|75171433	Peptidyl-prolyl cis-trans isomerase FKBP15-3	Arabidopsis thaliana	1.001		1.41243		1.17786
Garb_07348	36	129485	0.8	1	1	87.8	2e-14	gi|357529159	Protein transport protein Sec24-like CEF	Arabidopsis thaliana	---		---		---
cotton_GLEAN_10031594	36	20910	15	2	2	98.41	4e-61	gi|356506341	PREDICTED: pentatricopeptide repeat-containing protein At4g32430, mitochondrial-like	Glycine max	2.15054		1.36054		1.68919
cotton_GLEAN_10030404	33	166454	0.9	1	1	75.61	2e-10	gi|357436479	hypothetical protein MTR_1g008050	Medicago truncatula	1.24688	*	1.06045		1.12613	*
Garb_00983	31	17946	7.9	1	1	86.47	5e-66	gi|225432466	PREDICTED: peptide methionine sulfoxide reductase B5-like	Vitis vinifera	0.947867		1.03734		1.0101
cotton_GLEAN_10039109	31	87825	1.9	1	1	96.53	2e-110	gi|257222592	FtsH-like protein, partial	Nicotiana benthamiana	---		---		---
cotton_GLEAN_10001101	30	20747	7	1	1	56.73	2e-31	gi|15226875	thioredoxin O1	Arabidopsis thaliana	1.63934	*	1.24688		1.41243
Garb_26505	28	30119	4.7	1	1	92.45	1e-20	gi|154259502	putative FKBP-type peptidyl-prolyl cis-trans isomerase 1	Olea europaea	---		---		---
Garb_15146	27	133493	0.9	1	1	86.67	1e-79	gi|75330785	Protease Do-like 7	Arabidopsis thaliana	---		---		---
Garb_11457	25	46554	2.6	1	1	80.65	1e-155	gi|317106666	JHL18I08.3	Jatropha curcas	---		---		---
cotton_GLEAN_10022212	14	54892	1.6	1	1	81.51	0	gi|255537737	amino acid transporter, putative	Ricinus communis	---		---		1.79856
					Ubiquitin and proteasome (56)
cotton_GLEAN_10022884	375	19748	30.8	3	2	99.32	6e-79	gi|315937232	ubiquitin-conjugating family protein	Jatropha curcas	0.677966	*	1.03306		0.931966
Garb_07460	366	19776	33.6	3	2	95.45	7e-32	gi|75755827	Ubiquitin-conjugating enzyme E2 variant 1C	Arabidopsis thaliana	0.934579		1.17786		1.12867
Garb_11133	317	28462	19.6	4	2	96	8e-92	gi|41352683	putative proteasome 20S beta1 subunit, partial	Brassica napus	1.14943		0.926784		1.02145
Garb_07300	300	34159	15.9	3	3	86.97	2e-118	gi|17380545	Proteasome subunit alpha type-1-A	Arabidopsis thaliana	1.0352		0.774593	*	0.884173
Garb_16226	297	29610	33.5	6	1	98.18	8e-124	gi|255544626	proteasome subunit alpha type, putative	Ricinus communis	0.60024		0.746269		0.68918
Garb_07728	296	28571	19.6	4	2	89.18	2e-112	gi|82581522	Proteasome subunit beta type-6	Arabidopsis thaliana	1.03199		0.826446	*	0.938967
Garb_02971	272	49485	22	6	5	70.97	3e-96	gi|1709794	26S proteasome non-ATPase regulatory subunit 4	Arabidopsis thaliana	1.443		0.97371		1.14416	*
Garb_10347	266	33003	23.2	5	5	97.42	1e-87	gi|14594915	putative alpha3 proteasome subunit	Nicotiana tabacum	0.772201		0.864304		0.819672
Garb_39265	260	40749	12	3	3	75.08	1e-134	gi|3914430	Proteasome subunit beta type-5	Spinacia oleracea	0.638978	*	0.910747		0.823045
Garb_05750	244	33747	34.9	7	7	92.37	4e-126	gi|3914431	Proteasome subunit alpha type-3	Spinacia oleracea	1.78571	*	0.787402		1.1976
Garb_25276	231	39374	16.2	4	4	100	3e-08	gi|18803	polyubiquitin protein	Helianthus annuus	0.542005	*	0.792393	*	0.674764	*
cotton_GLEAN_10001132	223	60544	21.3	7	1	89.09	1e-20	gi|110224758	putative ubiquitin protein 2	Platanus x acerifolia	---		---		---
cotton_GLEAN_10023398	214	32091	22.6	3	1	98.59	2e-34	gi|79321461	ubiquitin-conjugating enzyme E2 35	Arabidopsis thaliana	---		---		---
cotton_GLEAN_10004702	170	29511	25.3	4	4	100	2e-125	gi|356534412	PREDICTED: proteasome subunit alpha type-5-like	Glycine max	1.54321		1.22699		1.43885
Garb_23240	165	39349	9.5	2	1	99.11	2e-153	gi|302595801	RecName: Full=E3 ubiquitin-protein ligase RING1	Gossypium hirsutum	1.27226		1.32979		1.31752
Garb_19238	164	57728	14.7	4	3	96.93	3e-113	gi|3024434	26S protease regulatory subunit 6A homolog	Brassica campestris	0.810373		0.949668		0.82713
Garb_10986	152	33123	22.8	5	1	99.19	6e-143	gi|211906468	20S proteasome subunit alpha-1	Gossypium hirsutum	---		---		---
Garb_00074	147	33325	18.1	4	4	94.98	2e-121	gi|12229936	Proteasome subunit alpha type-7	Cicer arietinum	1.001		0.745156		0.895255
Garb_22303	142	143493	3.8	3	3	95.1	3e-46	gi||95116512	ubiquitin activating enzyme	Theobroma cacao	0.517331	*	0.691563	*	0.564334	*
Garb_00574	131	57903	9.6	3	2	93.08	2e-162	gi|75168996	26S protease regulatory subunit 8 homolog A	Arabidopsis thaliana	1.08814		0.807103		0.919963
Garb_23464	121	63839	10.5	4	1	94.32	0	gi|327344117	putative PDF1-interacting protein 1, partial	Gossypium barbadense	---		---		---
Garb_22167	107	64182	9.9	3	3	86.89	0	gi|3914467	Probable 26S proteasome non-ATPase regulatory subunit 3	Nicotiana tabacum	0.848176		0.736377	*	0.753012
Garb_10260	101	55075	4.3	2	1	95.88	5e-173	gi|28558168	26S protease regulatory subunit 6B homolog	Arabidopsis thaliana	---		---		---
Garb_27276	99	66805	12.3	4	4	87.71	0	gi|225442341	ubiquitin carboxyl-terminal hydrolase 6	Vitis vinifera	0.770416		1.04493		0.84674
Garb_24088	95	62307	11.9	3	3	98.43	0	gi|356505102	PREDICTED: 26S proteasome regulatory subunit 4 homolog A-like	Glycine max	0.724113		0.91659		0.794913
Garb_05997	95	178192	1.3	1	1	71.97	0	gi|75331157	E3 ubiquitin-protein ligase ORTHRUS 2	Arabidopsis thaliana	0.762195		1.66113		1.12867
Garb_20091	90	127623	2.7	2	1	93.53	7e-137	gi|148841123	26S proteasome regulatory subunit	Gossypium hirsutum	---		---		---
Garb_17474	87	137163	6.9	5	5	74.17	7e-52	gi|25091517	Villin-4	Arabidopsis thaliana	0.723589		0.868056		0.810373
Garb_01293	86	113352	4.3	3	3	86.39	3e-29	gi|75265911	26S proteasome non-ATPase regulatory subunit 2 1A	Arabidopsis thaliana	0.337154		0.562114	*	0.487329
Garb_24850	81	25040	19.6	3	3	88.08	2e-99	gi|255540105	ubiquitin-conjugating enzyme E2-25kD, putative	Ricinus communis	1.1919		1.5949		1.38889
Garb_03190	73	55720	6.7	2	2	93.51	6e-35	gi|6850936	putative proteasome regulatory subunit	Cicer arietinum	0.550661		0.905797		0.737463
Garb_02484	71	34844	5.3	1	1	68.98	8e-87	gi|359481725	probable proteasome inhibitor isoform 2	Vitis vinifera	---		---		---
Garb_00327	67	20607	7.4	1	1	100	9e-55	gi|255575614	ubiquitin-conjugating enzyme E2, putative	Ricinus communis	0.346981		0.720981		0.458505
Garb_27054	59	29459	17.9	3	2	94.62	2e-125	gi|225453909	PREDICTED: proteasome subunit beta type-1	Vitis vinifer	1.3986		1.41844		1.4245
Garb_10256	57	116763	4.4	2	1	80.85	1e-18	gi|169261168	chloroplast protein import component Toc159-like	Oenothera grandiflora	---		---		---
Garb_28417	54	56723	6.8	2	2	81.69	9e-63	gi|110739922	chloroplast nucleoid DNA binding protein like	Arabidopsis thaliana	0.510465		1.81159		1.28205
cotton_GLEAN_10031909	54	49624	6.9	2	1	68.51	1e-87	gi|1709794	26S proteasome non-ATPase regulatory subunit 4	Arabidopsis thaliana	---		---		---
cotton_GLEAN_10002413	48	47522	6.9	2	2	55.21	1e-105	gi|59800404	Ubiquitin fusion degradation protein 1	Schizosaccharomyces pombe	4.14938		1.52672		1.43885
Garb_11499	48	36046	3.3	1	1	93.75	2e-56	gi|385213056	20S proteasome beta2 subunit, partial	Oryza brachyantha	0.386698		1.33511		0.831947
cotton_GLEAN_10022903	47	47344	4.1	1	1	64.42	2e-120	gi|356497843	PREDICTED: probable E3 ubiquitin-protein ligase HERC2-like	Glycine max	---		---		---
Garb_09811	46	29203	21.5	2	1	99.1	2e-129	gi|366984552	proteasome subunit beta type 1	Gossypium hirsutum	---		---		---
Garb_00461	46	25388	10.3	2	2	96.08	3e-84	gi|255537527	ubiquitin-conjugating enzyme h, putative	Ricinus communis	1.627		1.46103	*	1.543	*
Garb_30594	44	43614	3.4	1	1	76	6e-84	gi|74762414	E3 ubiquitin-protein ligase Hakai	Homo sapiens	---		---		---
Garb_08698	41	70493	5.5	2	2	88.7	0	gi|255538862	Protein RCC2, putative	Ricinus communis	0.933707		0.986193		0.94697
Garb_07359	40	26962	6.8	1	1	90.24	5e-109	gi|288558823	Proteasome subunit beta type-3-A	Arabidopsis thaliana	---		---		---
Garb_11818	39	215702	1	2	2	51.38	2e-114	gi|82075377	26S proteasome non-ATPase regulatory subunit 1	Gallus gallus	0.937207		0.951475		0.940734
Garb_04730	38	13621	10.2	1	1	100	2e-06	gi|51970338	ubiquitin-like protein SMT3-like	Arabidopsis thaliana	---		---		---
Garb_05649	37	44567	3.4	1	1	91.25	6e-37	gi|75339838	E3 ubiquitin-protein ligase RHF1A	Arabidopsis thaliana	---		---		---
Garb_29042	35	24320	5.7	1	1	95.4	3e-96	gi|18396376	ubiquitin-fold modifier-conjugating enzyme 1	Arabidopsis thaliana	---		---		---
Garb_28881	35	160538	0.9	1	1	82.07	9e-18	gi|75153899	Cullin-associated NEDD8-dissociated protein 1	Arabidopsis thaliana	---		---		---
Garb_21548	35	68985	5.4	2	2	92.79	8e-120	gi|225435249	PREDICTED: proteasome subunit beta type-4 isoform 1	Vitis vinifera	1.6129	*	1.5625		1.52672	*
Garb_18559	32	26065	4.9	1	1	94.54	2e-101	gi|255568247	ubiquitin-conjugating enzyme m, putative	Ricinus communis	---		---		---
Garb_02069	32	43980	3.8	1	1	81.65	2e-159	gi|225427965	PI-PLC X-box domain-containing protein DDB_G0293730	Vitis vinifera	---		---		---
Garb_03230	30	62684	2.1	1	1	92.56	6e-114	gi|18643260	putative permease 1	Arabidopsis thaliana	---		---		---
Garb_03518	29	35656	10.1	2	2	84.27	6e-62	gi|75205191	26S proteasome non-ATPase regulatory subunit RPN12A	Arabidopsis thaliana	1.5873		0.81103		1.1325
Garb_21656	27	60269	2.8	1	1	76.42	0	gi|125987784	Serine carboxypeptidase-like 51	Arabidopsis thaliana	---		---		---
					Peptidase and proteinase (71)
Garb_42406	994	57169	15.3	6	6	84.42	3e-95	gi|42563538	cysteine protease-like protein	Pelargonium x hortorum	0.97371		0.781861	*	0.873362
Garb_25139	650	73959	31.2	12	5	91.79	2e-69	gi|14939272	cytosol aminopeptidase	Oryza sativa Indica Group	1.223	*	1.16279		1.193
Garb_18031	578	67665	27.6	11	2	77.61	0	gi|85700452	Leucine aminopeptidase 3, chloroplastic	Arabidopsis thaliana	0.962464		0.86881		0.884173
cotton_GLEAN_10006989	457	61890	26.1	9	1	91.22	2e-73	gi|238013218	Leucine aminopeptidase 3, chloroplastic	Arabidopsis thaliana	0.742		0.845		0.793	*
Garb_04500	503	68502	13.3	6	1	83.33	6e-12	gi|356554203	LOW QUALITY PROTEIN: mitochondrial-processing peptidase subunit alpha-like	Glycine max	1.32275		0.967118		1.10865	*
Garb_09246	497	60153	17.5	7	4	78.85	0	gi|356513191	mitochondrial-processing peptidase subunit alpha-like isoform 2	Glycine max	1.40252	*	1.06724		1.15741
cotton_GLEAN_10006382	455	64904	30.4	10	3	91.79	3e-69	gi|149392729	cytosol aminopeptidase	Oryza sativa Indica Group	0.862813		1.34953		0.982318
cotton_GLEAN_10013973	438	52771	19.8	7	5	81.21	0	gi|255543963	Aspartic proteinase nepenthesin-1 precursor, putative	Ricinus communis	3.153		1.14679		1.819	*
Garb_30947	320	51366	15.9	4	1	78.52	2e-179	gi|255545932	Aspartic proteinase nepenthesin-1 precursor, putative	Ricinus communis	1.03306		1.51057		1.30208
cotton_GLEAN_10015764	244	41417	22.5	5	5	92.24	2e-155	gi|255542380	cysteine synthase, putative	Ricinus communis	0.55991		1.01523		0.728863	*
cotton_GLEAN_10021261	244	39625	12.4	3	1	100	5e-09	gi|17017261	S-adenosyl-L-homocysteine hydrolase	Zea mays	---		0.603136		0.280112
cotton_GLEAN_10010845	232	65711	18.7	6	3	86.99	0	gi|21616053	aspartic proteinase	Theobroma cacao	0.898473		0.884956		0.891266
cotton_GLEAN_10017555	226	65099	13.6	5	3	94.43	0	gi|464734	Adenosylhomocysteinase	Catharanthus roseus	0.811688		1.3089		0.829187
Garb_07183	221	67673	19.7	5	5	87.9	0	gi|343172848	gamma-aminobutyrate transaminase-like protein, partial	Silene latifolia	1.03842		0.788022	*	0.886525
Garb_08371	216	63126	10.2	3	3	70.23	0	gi|125987775	Serine carboxypeptidase-like 20	Arabidopsis thaliana	1.08225		0.841043	*	0.927644
Garb_28584	212	135744	7.6	6	1	82	8e-17	gi|357456317	Lysosomal alpha-mannosidase	Medicago truncatula	0.846024		1.46628		1.14155
Garb_02593	192	48564	13.4	3	1	87.5	1e-48	gi|129613	Cysteine proteinase	Carica papaya	---		---		---
Garb_08825	191	85191	4.2	2	1	79.52	6e-63	gi|75180764	Aspartic proteinase-like protein 1	Arabidopsis thaliana	1.31062	*	0.60241	*	0.884956
Garb_02655	181	59449	18.1	6	6	99.57	6e-135	gi|115449095	26S protease regulatory subunit 7	Oryza sativa Japonica Group	0.801925		0.800641		0.746269
Garb_06815	159	65391	8.8	3	3	83.27	0	gi|21616051	aspartic proteinase	Theobroma cacao	0.903342		0.786164	*	0.845309	*
cotton_GLEAN_10030578	154	58567	11.1	3	1	99.38	0	gi|57282617	putative papain-like cysteine proteinase	Gossypium hirsutum	1.08225		1.28205		1.17509	*
Garb_01454	150	59524	9.8	3	3	74.94	0	gi|75337170	Serine carboxypeptidase-like 27	Arabidopsis thaliana	0.671592	*	1.02459		0.884173
Garb_09096	145	326203	0.8	1	1	55.43	0	gi|172045749	E3 ubiquitin-protein ligase UPL1	Arabidopsis thaliana	0.969932		1.14548		1.05152	*
Garb_02510	144	58497	12.3	4	1	57.3	4e-36	gi|61214232	Aspartic proteinase nepenthesin-2	Nepenthes gracilis	1.53139		1.17786		1.32802
Garb_04151	142	50182	6.8	2	2	81.29	1e-161	gi|225428328	cysteine proteinase-like	Vitis vinifera	0.881834	*	1.0917		0.997009
Garb_27927	118	74472	7.5	3	3	85.29	1e-08	gi|356502497	pentatricopeptide repeat-containing protein At4g13650-like	Glycine max	1.04932		0.992063		1.02041
cotton_GLEAN_10022006	115	47842	9.2	2	2	90.29	1e-92	gi|2253415	stress-induced cysteine proteinase	Lavatera thuringiaca	0.888889		1.16009		1.17233
Garb_31845	109	48130	9.1	2	2	98.61	0	gi|57282619	cysteine proteinase	Gossypium hirsutum	0.930233		1.0929		1.03734
cotton_GLEAN_10024465	108	62621	10.4	3	3	82.98	2e-15	gi|359481559	serine carboxypeptidase-like 45-like	Vitis vinifera	1.13895		1.45985		1.43472
Garb_26431	98	82880	3.5	2	2	68.52	0	gi|75264030	Probable inactive purple acid phosphatase 2	72.51	0.559597	*	1.0352		0.796813	*
cotton_GLEAN_10001029	94	47173	12.1	3	3	83.6	4e-83	gi|149941232	putative cathepsin B-like cysteine protease,putative	Vigna unguiculata	1.12867		1.02459		0.907441
Garb_25311	85	42115	7.4	2	2	81.76	1e-50	gi|302784214	hypothetical protein SELMODRAFT_442286	Selaginella moellendorffii	1.321		1.04603		1.16414
Garb_18570	81	35185	10.1	2	2	59.69	4e-87	gi|359496065	polyneuridine-aldehyde esterase-like	Vitis vinifera	1.50376		0.924214		1.15741
Garb_14580	80	104621	9.5	5	1	63.61	7e-132	gi|75262722	Probable inactive purple acid phosphatase 29	84.16	---		---		---
cotton_GLEAN_10025324	78	78331	8.2	4	2	81.56	8e-113	gi|380863068	gamma-glutamyl transferase, partial	Dimocarpus longan	1.5528		0.907441		1.16686
Garb_04804	78	64713	2.7	1	1	72.6	0	gi|224054732	glycoside hydrolase	Populus trichocarpa	0.651466		1.00604		0.847458
Garb_01146	78	54100	3.3	1	1	73.1	4e-139	gi|79495937	aspartyl protease family protein	Arabidopsis thaliana	0.726216		0.859845		0.817661	*
Garb_10047	77	34150	13.2	3	3	81.01	2e-128	gi|3913733	Hydroxyacylglutathione hydrolase cytoplasmic	Arabidopsis thaliana	0.489716		0.707714		0.62383
Garb_31660	76	67035	2.2	1	1	81.48	1e-60	gi|34978926	purple acid phosphatase	Boechera holboellii	---		---		---
Garb_17352	76	45241	5.4	2	2	82.61	2e-78	gi|37655265	cysteine proteinase	Glycine max	1.38504		1.08225		1.19332
Garb_42804	75	48714	12.7	3	3	80.49	2e-11	gi|416764	Cysteine proteinase 2	Carica candamarcensis	0.944287		0.938086		0.926784
Garb_31724	75	59639	7.3	3	3	61.28	3e-153	gi|75336113	Serine carboxypeptidase-like 50	Arabidopsis thaliana	1.15607		0.647249	*	0.793021
Garb_10336	73	72959	6.5	2	2	88.3	0	gi|255553715	Dihydroorotase, mitochondrial precursor, putative	Ricinus communis	0.680735		1.59744		1.19332
cotton_GLEAN_10036990	66	45714	4.8	2	1	87.25	1e-74	gi|53748483	cysteine protease 1	Plantago major	---		---		---
Garb_16277	65	72743	4.8	2	2	94.1	0	gi|74476783	neutral/alkaline invertase	Manihot esculent	0.818331		0.69735		0.749064
Garb_19083	64	69904	4	2	1	61.76	9e-66	gi|297793171	glycosyl hydrolase family 17 protein	Arabidopsis lyrata subsp. lyrata	---		---		---
Garb_16632	60	68948	10.6	3	2	76.75	4e-108	gi|85700445	Probable mitochondrial-processing peptidase subunit beta	Arabidopsis thaliana	0.958773		1.08108		1.05932
cotton_GLEAN_10002256	58	62336	5	2	2	73.56	0	gi|356538555	serine carboxypeptidase-like 34-like	Glycine max	1.5748	*	1.25628	*	1.37363	*
Garb_12972	54	64544	4.3	1	1	94.87	0	gi|18447763	putative serine carboxypeptidase precursor	Gossypium hirsutum	1.5015		1.0627		1.24224
Garb_32857	53	81480	2.2	1	1	73.1	0	gi|75222988	Probable inactive purple acid phosphatase 27	Arabidopsis thaliana	---		---		---
Garb_35434	52	50488	2.3	1	1	98.04	7e-136	gi|27728675	cysteine protease	Gossypium hirsutum	---		---		---
Garb_00056	46	63907	2.5	1	1	64.54	2e-180	gi|255586856	Aspartic proteinase nepenthesin-1 precursor, putative	Ricinus communis	1.57978		0.979432		1.22249
Garb_32674	45	54511	4.2	1	1	66.67	1e-57	gi|75180976	Putative serine carboxypeptidase-like 53	Arabidopsis thaliana	---		---		---
cotton_GLEAN_10031117	45	47003	3.2	1	1	75.26	6e-83	gi|52546918	cysteine proteinase, partial	Petunia x hybrida	---		---		---
Garb_18409	44	49502	2.9	1	1	77.22	1e-68	gi|357452061	Gamma-glutamylhydrolase	Medicago truncatula	3.77358		0.0486169		---
Garb_23075	43	53224	3.9	1	1	94.88	2e-110	gi|289166870	glycosyltransferase family 47A	Salix sachalinensis	---		---		---
Garb_29964	43	61220	2.8	1	1	65.03	2e-180	gi|75334909	Serine carboxypeptidase-like 35	Arabidopsis thaliana	---		---		---
Garb_29069	42	67484	3.5	1	1	63.42	1e-167	gi|356510754	reticuline oxidase-like protein-like	Glycine max	---		---		---
Garb_13771	41	58393	9.8	3	3	84.2	0	gi|75163801	LL-diaminopimelate aminotransferase, chloroplastic	Arabidopsis thaliana	1.15875		1.39665		1.00402
Garb_25723	39	47456	5.3	2	2	59.85	1e-06	gi|81817465	Putative esterase yitV	Bacillus subtilis	3.11526		2.1097		2.48756
Garb_04111	38	54416	5.8	2	2	63.99	3e-141	gi|74866565	Beta-ureidopropionase	Bacillus subtilis	0.613121		0.93633		0.769823	*
Garb_31734	38	78892	1.9	1	1	73.33	2e-152	gi|255567949	Aspartic proteinase nepenthesin-1 precursor, putative	Ricinus communis	---		---		---
cotton_GLEAN_10002481	38	65176	2.2	1	1	69.3	0	gi|225458529	serine carboxypeptidase II-3-like	Vitis vinifera	---		---		---
cotton_GLEAN_10038238	37	35280	5.3	1	1	95.65	9e-33	gi|254914191	putative 2-cys peroxiredoxin	Lemna minor	---		---		---
Garb_22590	37	17962	10.1	1	1	64.84	5e-30	gi|356555738	cysteine proteinase inhibitor 1-like	Glycine max	---		---		---
Garb_04244	36	67472	4.1	1	1	88.12	0	gi|21901929	carboxypeptidase type III	Theobroma cacao	---		---		---
Garb_01142	34	56165	2.3	1	1	71.43	5e-163	gi|255563827	Aspartic proteinase nepenthesin-1 precursor, putative	Ricinus communis	---		---		---
cotton_GLEAN_10030577	31	61101	2.6	1	1	83.78	0	gi|83288387	Purple acid phosphatase	Glycine max	---		---		---
Garb_19288	29	33769	3.7	1	1	76.77	2e-37	gi|18874516	cystatin	Sandersonia aurantiaca	---		---		---
Garb_05768	28	15096	19.4	1	1	76.71	3e-26	gi|157927863	cysteine proteinase inhibitor [	Sandersonia aurantiaca	---		---		---
Garb_18780	26	42694	7.2	1	1	71.95	1e-137	gi|225443200	uric acid degradation bifunctional protein TTL-like isoform 1	Vitis vinifera	---		---		---
					Signaling transduction (119)
					GTP-binding protein (20)
Garb_01483	165	28950	19.2	4	1	90.24	1e-88	gi|114088	Ras-related protein RABE1	Arabidopsis thaliana	---		---		---
cotton_GLEAN_10030128	144	54493	18.5	6	6	98.88	3e-102	gi|1351974	ADP-ribosylation factor	Zea mays	0.818331		0.83682		0.727273	*
Garb_12356	108	56782	6.1	2	2	77.67	0	gi|255573503	arf gtpase-activating protein, putative	Ricinus communis	0.553403		0.887311		0.760456
Garb_02256	102	34488	8.3	2	2	98.64	4e-118	gi|296081995	GTP-binding nuclear protein Ran-3	Arabidopsis thaliana	0.696864		0.762195		0.748503
Garb_03396	91	27059	30.3	5	2	97.33	2e-105	gi|89257641	GTP-binding protein RAB2A, putative	Brassica oleracea	0.746826		0.628536		0.672043
cotton_GLEAN_10011010	87	26752	22.7	4	1	91.47	3e-115	gi|75281787	Ras-related protein RABB1b	Arabidopsis thaliana	---		---		---
Garb_26041	85	26331	19.2	3	1	93.43	1e-107	gi|356568583	ras-related protein RABD2a-like	Glycine max	---		---		---
Garb_02633	83	27964	21.3	3	3	97.1	9e-111	gi|400923	Ras-related protein Rab7	Pisum sativum	0.687758		0.660066		0.671592
Garb_05542	77	46009	3.9	1	1	85.63	2e-70	gi|266989	GTP-binding protein SAR1B	Arabidopsis thaliana	0.788022		0.851789		0.815661
Garb_31779	68	46117	16.7	4	4	90.57	0	gi|225447856	rae1-like protein At1g80670	Vitis vinifera	0.8		0.952381		0.982318
Garb_12624	65	33501	4.8	1	1	76.13	1e-62	gi|75264036	Ran-binding protein 1 homolog a	Arabidopsis thaliana	1.06724		1.09409		1.07181
cotton_GLEAN_10022640	58	32846	14.4	2	1	87.97	1e-80	gi|76789667	Ran-binding protein 1 homolog b	Arabidopsis thaliana	---		---		---
Garb_06764	54	82729	2.3	1	1	85.17	6e-158	gi|255542620	rac-GTP binding protein, putative	Ricinus communis	---		---		---
Garb_35875	45	59964	4.5	2	2	51.23	1e-124	gi|75334877	RAN GTPase-activating protein 1	Arabidopsis thaliana	1.39276	*	1.00604		1.19617	*
Garb_00733	39	30301	5	1	1	78.14	1e-94	gi|225456136	ras-related protein RABA6b	Vitis vinifera	---		---		---
Garb_18443	37	99431	4	1	1	87.82	4e-70	gi|225434536	ran-binding protein 1 homolog c-like	Vitis vinifera	---		---		---
Garb_23449	35	69179	3	1	1	55.29	6e-16	gi|116242482	Ras GTPase-activating protein-binding protein 2	Homo sapiens	---		---		---
Garb_34444	34	22062	7	1	1	64.34	1e-50	gi|255571533	conserved hypothetical protein	Ricinus communis	---		---		---
cotton_GLEAN_10001774	32	44407	4.2	1	1	84.23	2e-113	gi|75337048	Acetylglutamate kinase	Arabidopsis thaliana	---		---		---
Garb_17866	31	26193	11.9	2	2	88.06	1e-95	gi|75169988	Ras-related protein RABF1	Arabidopsis thaliana	0.73692		0.780031		0.75815
					Phospholipase (3)
Garb_19957	330	105348	16.6	9	1	99.63	0	gi|195984443	phospholipase D alpha	Gossypium arboreum	---		---		---
Garb_08655	91	41281	8.3	3	3	81.16	6e-25	gi|33772230	phosphorylase	Malus x domestica	1.35501		0.887311		1.07527
Garb_18297	26	110622	1.2	1	1	83.72	2e-35	gi|124702587	phospholipase C	Spinacia oleracea	---		---		---
					Ca2+ binding (17)
cotton_GLEAN_10013144	607	63491	17.5	6	1	92.86	1e-31	gi|4650852	calreticulin	Lithospermum erythrorhizon	1.404	*	1.007		1.118	*
Garb_15803	233	20240	24.2	3	1	100	4e-67	gi|27805429	Calmodulin-7	Arabidopsis thaliana	0.890472		0.758725	*	0.87108
Garb_33970	214	43754	22.8	6	6	100	5e-176	gi|38194890	Anx1	Gossypium hirsutum	1.38122		0.735835	*	1.06952
Garb_39242	132	18524	15.2	2	2	82.4	4e-55	gi|18406507	calcium-binding EF-hand-containing protein	Arabidopsis thaliana	1.41643	*	0.786164	*	1.10742
Garb_10316	104	96548	5.7	4	2	92.59	8e-88	gi|356567296	PREDICTED: clathrin interactor EPSIN 3-like	Glycine max	---		1.35135		2.18341
Garb_01094	89	20240	24.2	3	1	100	2e-56	gi|15077711	calmodulin-like protein	Capsicum annuum	---		---		---
Garb_41929	86	24051	22.6	3	3	70.8	1e-46	gi|75333592	Probable calcium-binding protein	Arabidopsis thaliana	1.32802		1.05152		1.16686
Garb_20149	82	70281	6.1	3	2	98.1	2e-173	gi|15214410	annexin	Gossypium hirsutum	---		0.747943		0.569152
Garb_24483	72	74515	4.5	2	2	87.53	0	gi|110742404	calcium-dependent protein kinase	Arabidopsis thaliana	0.784929		0.732601		0.745712
cotton_GLEAN_10031687	52	44247	8.9	2	1	99.37	0	gi|1843527	annexin, partial	Gossypium hirsutum	---		---		---
Garb_00732	50	19985	22.7	3	3	66.96	5e-30	gi|289064983	calmodulin 24-like protein	Populus tremula x Populus alba	1.47929		0.807754		0.982318
Garb_02081	42	46520	5.5	1	1	79.94	8e-156	gi|255586847	calcium ion binding protein, putative	Ricinus communis	---		---		---
Garb_10629	39	20523	19.7	2	2	93.2	6e-76	gi|255537071	calmodulin, putative	Ricinus communis	0.582411		0.67659	*	0.647668
Garb_13998	38	33704	3.2	1	1	85.71	7e-07	gi|15220649	COP1-interacting protein-like protein	Arabidopsis thaliana	---		---		---
Garb_04883	37	62184	2.4	1	1	88.57	0	gi|225460973	PREDICTED: calcium-dependent protein kinase 9-like	Vitis vinifera	---		---		---
Garb_04149	33	73834	2.7	1	1	91.58	0	gi|967125	calcium dependent protein kinase	Vigna radiata	---		---		---
cotton_GLEAN_10034805	31	132546	1.4	1	1	83.9	0	gi|255584132	calcium-transporting atpase 4, endoplasmic reticulum-type, putative	Ricinus communis	---		---		---
					Kinase and phosphatase(40)
Garb_16350	147	134633	1.2	1	1	81.33	3e-113	gi|255555033	ATP binding protein, putative	Ricinus communis	1.23457		1.21803		1.20337
Garb_24583	145	36991	11	2	2	98.53	6e-155	gi|21190648	S-formylglutathione hydrolase	Gossypium hirsutum	1.18624		1.15473		1.13122
Garb_08168	137	46444	16.6	4	3	92.12	5e-123	gi|79324935	putative receptor-like protein kinase	Arabidopsis thaliana	1.18765		0.647249		0.868056
cotton_GLEAN_10015599	115	113018	5.4	3	1	93.68	6e-162	gi|8247189	putative serine threonine kinase	Arabidopsis thaliana	---		---		---
Garb_19724	111	132838	4.5	3	3	77.85	0	gi|224137802	autoinhibited calcium ATPase	Populus trichocarpa	0.804505		0.794281		0.803213
Garb_28404	98	44518	7.9	2	2	86.97	2e-176	gi|255576916	Nodulation receptor kinase precursor, putative	Ricinus communis	1.25471		0.609013		0.864304
Garb_02336	87	35294	8.6	2	2	91.93	5e-154	gi|75303285	Probable protein phosphatase 2C 59	Arabidopsis thaliana	0.859107		0.978474		0.877193
cotton_GLEAN_10038381	78	98104	2	1	1	90.1	4e-165	gi|225735176	protein kinase-coding resistance protein	Malus x domestica	1.00604		0.744048		0.857633
Garb_09324	74	56105	8.5	2	2	69.78	3e-158	gi|62900617	SNF1-related protein kinase regulatory subunit gamma-1	rabidopsis thaliana	1.22249		0.724113		0.951475
Garb_24945	70	73892	8.4	4	4	99.59	2e-139	gi|148841119	protein phosphatase, partial	Gossypium hirsutum	1.0627		1.001		0.887311
cotton_GLEAN_10030149	65	63738	8.7	4	3	53.49	3e-06	gi|19884209	Serine/threonine-protein kinase AfsK	Arabidopsis thaliana	1.31234		1.08225		1.21655
Garb_09469	64	34279	8.5	2	2	84.48	4e-51	gi|255549094	snf1-kinase beta subunit, plants, putative	Ricinus communis	1.46199		1.94932		1.61031
Garb_18563	58	162994	0.8	1	1	50.26	6e-36	gi|75099196	G-type lectin S-receptor-like serine/threonine-protein kinase At1g61360 OS=Arabidopsis thaliana GN=At1g61360 PE=2 SV=1	Arabidopsis thaliana	1.63132		0.970874		1.23916
Garb_24713	57	67793	3	1	1	79.83	7e-112	gi|255639137	Probable inactive receptor kinase	Arabidopsis thaliana	---		---		---
Garb_38040	52	211811	0.9	1	1	70.33	1e-69	gi|4455151	putative serine/threonine kinase (fragment)	Arabidopsis thaliana	---		---		---
Garb_17171	51	124768	0.8	1	1	75.07	6e-160	gi|255567852	wall-associated kinase, putative	Ricinus communis	---		---		---
Garb_27906	51	60895	4.3	2	2	96.77	2e-08	gi|222635137	Rab GDP dissociation inhibitor alpha	Oryza sativa Japonica Grou	1.41443		0.969932		1.16822
Garb_03704	48	49731	8.5	2	2	61.89	2e-124	gi|255567451	ATP binding protein, putative	Ricinus communis	1.91205		0.94697		1.37363
Garb_21673	47	104877	2.5	1	1	96.18	2e-133	gi||10638981	protein phosphatase	Fagus sylvatica	---		---		---
Garb_00846	44	52447	3.7	1	1	73.14	1e-93	gi|297736701	Nuclear inhibitor of protein phosphatase 1	Vitis vinifera	---		---		---
Garb_12861	43	97215	1.7	1	1	78.02	0	gi|359483671	PREDICTED: serine/threonine-protein phosphatase 6 regulatory subunit 3	Vitis vinifera	---		---		---
Garb_06236	42	90626	1.4	1	1	79.76	7e-74	gi|33772201	protein kinase	Malus	---		---		---
Garb_21128	41	37745	4.5	1	1	96.23	1e-170	gi|7248363	type 2A protein phosphatase-3	Vicia faba	---		---		---
Garb_33300	41	103203	3.6	3	2	70.59	6e-131	gi|255576782	s-receptor kinase, putative	Ricinus communis	1.16414		0.903342		1.01729
Garb_14405	40	60040	3.8	2	1	86.79	0	gi|255546475	ATP binding protein, putative	Ricinus communis	---		---		---
cotton_GLEAN_10030609	40	115550	2.3	2	2	90.91	5e-76	gi|157283483	kinase-like protein	Prunus cerasus var. caproniana	2.44499		1.39276		1.84162
Garb_15383	39	76218	2.6	1	1	76.59	2e-136	gi|356522867	PREDICTED: probable inactive receptor kinase At1g48480-like	Glycine max	---		---		---
Garb_10301	38	291251	1.3	2	1	90.83	3e-114	gi|6692674	PTI1-like tyrosine-protein kinase 3	Arabidopsis thaliana	---		---		---
cotton_GLEAN_10022023	37	80088	3.8	2	2	75.16	3e-150	gi|359497867	PREDICTED: cysteine-rich receptor-like protein kinase 10-like, partial	Vitis vinifera	1.35501		0.744602		0.98912
Garb_00672	37	46784	3.6	1	1	87.77	1e-175	gi|356500078	PREDICTED: serine/threonine-protein kinase SRK2E-like	Glycine max	---		---		---
Garb_34412	34	84445	2.4	1	1	54.58	4e-88	gi|75333861	Probable L-type lectin-domain containing receptor kinase S.7	Arabidopsis thaliana	---		---		---
Garb_05400	34	90170	2.5	1	1	64.23	8e-92	gi|353678126	Serine/threonine-protein kinase 24	Arabidopsis thaliana	---		---		---
Garb_42817	32	46788	4.2	1	1	89.82	0	gi|225430502	probable protein phosphatase 2C 60	Vitis vinifera	---		---		---
Garb_11858	29	123919	0.6	1	1	66.6	0	gi|356509054	PREDICTED: probable inactive receptor kinase At5g10020-like isoform 1	Glycine max	---		---		---
Garb_32435	29	43336	4.6	1	1	88.59	1e-154	gi|356512960	PREDICTED: probable inactive receptor kinase At1g48480-like	Glycine max	---		---		---
Garb_22399	29	66014	3	1	1	99.56	7e-132	gi|312164245	brassinosteroid signaling kinase 1	Gossypium hirsutum	---		---		---
Garb_29325	29	38979	3.5	1	1	82.59	1e-143	gi|255546059	conserved hypothetical protein	Ricinus communis	---		---		---
Garb_00258	26	51053	3.8	1	1	98.99	0	gi|334145755	mitogen-activated protein kinase	Gossypium hirsutum	---		---		---
Garb_07725	24	53752	3.8	1	1	50.94	4e-76	gi|97052021	Serine/threonine-protein kinase HT1	Arabidopsis thaliana	---		---		---
Garb_27638	24	89424	3.2	1	1	92.97	0	gi|255567335	serine/threonine protein kinase, putative	Ricinus communis	---		---		---
					Others (39)
cotton_GLEAN_10039299	245	67081	19.6	8	1	53.42	5e-08	gi|264664533	Probable LRR receptor-like serine/threonine-protein kinase At5g45780	Arabidopsis thaliana	---		0.595948		0.431034
cotton_GLEAN_10040184	238	116774	9.9	7	3	71.16	2e-151	gi|363807628	probable leucine-rich repeat receptor-like protein kinase At5g49770	Glycine max	1.32626		1.581	*	1.45409	*
cotton_GLEAN_10031546	236	14296	69.4	4	4	72.07	3e-32	gi|1702983	Auxin-repressed 12.5 kDa protein	Fragaria ananassa	1.30301	*	1.66489		1.58579	*
cotton_GLEAN_10010113	206	110194	4.6	3	2	69.37	4e-159	gi|357451927	Receptor-like protein kinase	Medicago truncatula	1.42653		0.947867		1.0846
Garb_33643	186	81366	9.2	5	2	66.51	0	gi|322518656	Probable serine protease EDA2	Arabidopsis thaliana	1.65837	*	0.780031	*	1.11732	*
cotton_GLEAN_10017090	172	118896	9.3	7	7	77.02	1e-135	gi|359484014	PREDICTED: probable LRR receptor-like serine/threonine-protein kinase At1g56140	Vitis vinifera	1.1236		1.34953	*	1.14548
Garb_02171	165	123532	1.5	1	1	96.25	7e-159	gi|255545339	bsu-protein phosphatase, putativeputative [Ricinus communis]	Ricinus communis	1.07411		0.993049		1.04493
Garb_06252	138	125832	3.5	3	3	75	2e-132	gi|264664587	Probable LRR receptor-like serine/threonine-protein kinase At1g56140	Arabidopsis thaliana	1.11483		0.77101		0.946074
Garb_16396	138	61190	7.4	3	1	59.33	8e-08	gi|75331406	Probable LRR receptor-like serine/threonine-protein kinase At5g63710	Arabidopsis thaliana	0.784314		0.754717		0.76864
cotton_GLEAN_10002629	115	105740	7.4	5	5	76.56	0	gi|60392233	Dynamin-related protein 3A	Arabidopsis thaliana	1.49701	*	1.06157		1.22249
cotton_GLEAN_10030367	115	53335	12.8	4	4	93.1	7e-25	gi|75331763	FAM10 family protein At4g22670	Arabidopsis thaliana	1.41243	*	0.860585		1.09529
Garb_25557	109	129759	6.6	5	4	76.31	6e-159	gi|313471762	Probable leucine-rich repeat receptor-like serine/threonine-protein kinase At3g14840	Arabidopsis thaliana	1.15607		1.20192		1.19332
Garb_06707	109	80349	12.5	5	3	90.49	0	gi|75319499	Dynamin-related protein 12A	Glycine max	1.20773		0.578035		0.851064
Garb_22404	106	40895	2.8	1	1	57.72	2e-89	gi|38257899	LysM domain-containing GPI-anchored protein 2	Arabidopsis thaliana	1.2837	*	0.93985		1.07991
Garb_04670	99	79703	9.8	4	3	82.53	0	gi|225453246	PREDICTED: dynamin-related protein 1E isoform 1	Vitis vinifera	1.36612		0.881057		1.05263
Garb_13609	88	115178	7.6	5	5	84.95	5e-39	gi|356499034	PREDICTED: probable LRR receptor-like serine/threonine-protein kinase At1g06840-like	Glycine max	1.35501		0.980392		1.27877	*
cotton_GLEAN_10026609	77	17307	23.1	1	1	93.94	4e-29	gi|357468469	Macrophage migration inhibitory factor family protein expressed	Medicago truncatula	0.628141		1.09649		0.966184
Garb_12351	72	26207	7.8	1	1	80.6	7e-91	gi|224138116	Abscisic acid receptor PYR1	Arabidopsis thaliana	0.904159		0.613874		0.75358
Garb_08345	69	119243	3.1	2	2	91.94	2e-28	gi|296081431	Auxilin-related protein 2	Arabidopsis thaliana	0.671141		0.92081		0.821018	*
Garb_31129	65	90277	2.9	1	1	79.12	1e-156	gi|75318316	Leucine-rich repeat extensin-like protein 2	Arabidopsis thaliana	---		---		---
cotton_GLEAN_10029529	65	44476	9.6	3	2	76.94	3e-163	gi|377774270	leucine-rich repeat receptor-like protein	Malus	0.818331		1.20627		0.990099
Garb_27731	60	105316	2.4	2	2	67.39	0	gi|75202755	Probably inactive leucine-rich repeat receptor-like protein kinase IMK2	Arabidopsis thaliana	0.92081		0.825764		0.870322
Garb_07741	46	45727	5.4	1	1	97.96	9e-21	gi|226451209	COP9 signalosome 5A	Helianthus annuus	---		---		---
Garb_14876	43	71585	5	2	2	82.13	0	gi|255565711	Nicalin precursor, putative	Ricinus communis	1.41044		1.19048		1.29534
Garb_27885	43	101591	3.7	2	1	73.55	5e-137	gi|75337933	Probable receptor-like protein kinase At4g39110	Arabidopsis thaliana	---		---		---
Garb_28235	42	24575	11.8	2	2	97.5	1e-86	gi|115393868	phytocyanin-like arabinogalactan-protein	Gossypium hirsutum	4.2735		1.1325		2.28833
Garb_25333	41	110394	1.3	1	1	83.2	0	gi|357462845	Receptor-like kinase	Medicago truncatula	2.90698		1.94175		2.36407
Garb_21198	41	117827	2.5	2	2	51.15	0	gi|263430191	Probable LRR receptor-like serine/threonine-protein kinase At1g67720	Arabidopsis thaliana	1.72117		1.14025		1.41443
Garb_39465	39	94609	2.2	1	1	53.83	4e-68	gi|464806	Signal recognition particle 72 kDa protein	Canis familiaris	1.17096		1.64745		1.3369
cotton_GLEAN_10012807	38	154037	1.2	1	1	94.23	5e-151	gi|224137076	Methyltransferase-like protein 14	Populus trichocarpa	---		---		---
Garb_06684	37	62129	5.1	2	2	87.84	3e-134	gi|255537473	receptor protein kinase, putative [Ricinus communis] >gi|223549702|gb|EEF51190.1| receptor protein kinase, putative [Ricinus communis]	Ricinus communis	1.60772		0.678426		1.02564
Garb_01212	36	77239	2.5	1	1	94.57	1e-142	gi|264664527	Probable LRR receptor-like serine/threonine-protein kinase At5g10290	Arabidopsis thaliana	---		---		---
Garb_19430	36	118278	2.1	1	1	66.42	0	gi|264664588	Probable LRR receptor-like serine/threonine-protein kinase At1g53440	Arabidopsis thaliana	---		---		---
cotton_GLEAN_10005669	35	77231	1.8	1	1	59.53	8e-51	gi|75330007	Probable receptor-like protein kinase At5g18500	Arabidopsis thaliana	---		---		---
Garb_23718	34	160717	1.5	2	2	72.82	0	gi|349504495	leucine rich repeat-containing protein	Corchorus capsularis	1.771		1.415		1.57233	*
cotton_GLEAN_10027106	33	91614	3.8	2	2	77.73	0	gi|75219638	Leucine-rich repeat receptor-like serine/threonine-protein kinase BAM1	Arabidopsis thaliana	0.933707		1.51745		1.2837
cotton_GLEAN_10037886	31	102426	3.7	2	1	73.87	1e-137	gi|75318671	Probable receptor-like protein kinase At2g39360	Arabidopsis thaliana	---		---		---
cotton_GLEAN_10003406	31	137001	0.5	1	1	54.32	5e-12	gi|338819809	Probable LRR receptor-like serine/threonine-protein kinase At5g65240	Arabidopsis thaliana	142.857		90.9091		83.3333
Garb_05699	27	41122	3.7	1	1	79.45	2e-137	gi|55976550	COP9 signalosome complex subunit 6a	Arabidopsis thaliana	---		---		---
					Membrane and transport (108)
					channel and porin (19)
Garb_09969	314	28795	6.2	1	1	96.09	4e-72	gi|292653535	aquaporin TIP1;10, partial	Gossypium hirsutum	0.556174		0.481928	*	0.505561	*
cotton_GLEAN_10022435	280	35526	21.5	4	2	92.4	9e-125	gi|300793598	aquaporin PIP2;10	Gossypium hirsutum	0.348918	*	0.258465	*	0.290698	*
Garb_04584	265	35148	20.7	4	2	91.4	3e-143	gi|256568429	PIP protein	Gossypium hirsutum	0.600601		0.488998	*	0.540541	*
cotton_GLEAN_10022598	166	27651	6.3	1	1	99.6	2e-104	gi|292653531	aquaporin TIP1;7	Gossypium hirsutum	0.717875		0.618812	*	0.641026	*
cotton_GLEAN_10036392	151	33773	11.2	2	1	99.64	9e-160	gi|256568423	PIP protein	Gossypium hirsutum	---		---		---
Garb_00715	135	33722	11.2	2	1	99.64	2e-159	gi|256568425	PIP protein	Gossypium hirsutum	---		---		---
Garb_13025	117	34645	10.2	2	2	94.39	7e-157	gi|164668308	PIP2 protein	Gossypium hirsutum	0.661813		0.389864	*	0.521648	*
Garb_22164	111	33478	10.8	3	2	100	1e-160	gi|171190270	aquaporin PIP2;4	Gossypium hirsutum	0.641849		0.575043		0.613121
Garb_01957	108	27839	6.3	1	1	96.09	1e-72	gi|292653541	aquaporin TIP1;13, partial	Gossypium hirsutum	0.651042		0.548546		0.591716
Garb_19337	99	24791	7	1	1	85.44	1e-43	GI:461929	Probable aquaporin TIP-type	Antirrhinum majus	0.702247		0.361141	*	0.503018	*
Garb_13932	86	35942	3.5	1	1	100	4e-159	gi|118132686	PIP1 protein	Gossypium hirsutum	0.445434		0.162259	*	0.269542	*
cotton_GLEAN_10010295	79	47118	10.6	3	1	87.38	3e-107	gi|75099082	Thiosulfate/3-mercaptopyruvate sulfurtransferase 1	Arabidopsis thaliana	---		---		---
cotton_GLEAN_10018594	70	27216	6.8	1	1	98.41	9e-127	gi|300793602	TPA: TPA_inf: aquaporin TIP1;4	Gossypium hirsutum	0.587889	*	0.329489	*	0.45106	*
cotton_GLEAN_10019420	57	26972	4.4	1	1	100	1e-73	gi|292653547	aquaporin TIP2;5, partial	Gossypium hirsutum	0.774		0.561798		0.657895	*
cotton_GLEAN_10004514	50	46156	8.7	2	2	83.78	5e-08	gi|224100027	Probable nucleoporin Nup58	Populus trichocarpa	1.0101		1.13379		1.0917
Garb_03642	50	34545	6.1	1	1	99.61	4e-139	gi|150416573	aquaporin PIP1-2	Gossypium hirsutum	---		---		---
cotton_GLEAN_10009309	50	33902	3.9	1	1	99.3	5e-162	gi|118132690	PIP2 protein	Gossypium hirsutum	---		---		---
Garb_20791	42	78758	3.1	2	1	93.33	5e-86	gi|308080258	Transmembrane 9 superfamily member 3	Zea mays	---		---		---
Garb_09442	34	35048	3	1	1	70.42	1e-101	gi|75298155	Bifunctional monodehydroascorbate reductase and carbonic anhydrase nectarin-3	Ricinus communis	---		---		---
					transporter (24)
Garb_28931	573	36246	30.8	6	1	86.67	6e-40	gi|15637165	voltage-dependent anion channel	Beta vulgaris	0.388199		0.789889		0.628536
cotton_GLEAN_10030154	507	35498	23.7	6	2	83.95	1e-32	gi|114384158	voltage-dependent anion-selective channel protein	Musa acuminata	0.505817		0.69979		0.639386
Garb_17003	384	50731	16.8	6	3	97.67	0	gi|3334115	RecName: Full=ADP,ATP carrier protein	Gossypium hirsutum	0.890472		0.90009		0.886525
Garb_24918	282	45018	13	4	1	100	4e-26	gi|2463666	adenine nucleotide translocator 2	Gossypium hirsutum	---		---		---
Garb_17401	194	299468	2.2	3	1	78.67	0	gi|225437787	PREDICTED: ABC transporter B family member 11	Vitis vinifera	0.907441		0.995025		1.002
cotton_GLEAN_10025437	189	155889	6.6	5	3	84.02	0	gi|224130846	multidrug/pheromone exporter, MDR family, ABC transporter family	Populus trichocarpa	2.409	*	1.309		1.699	*
Garb_26435	167	38371	27.2	5	3	79.71	4e-121	gi|255568593	voltage-dependent anion-selective channel, putative	Ricinus communis	0.492611	*	0.909918		0.739098	*
cotton_GLEAN_10030864	157	37637	38.8	7	5	83.2	4e-54	gi|296087314	Mitochondrial outer membrane protein porin 2	Arabidopsis thaliana	0.631313	*	0.909091		0.831255	*
Garb_40235	84	15412	27	3	2	91.87	6e-61	gi|225425388	PREDICTED: nuclear transport factor 2 isoform 1	Vitis vinifera	1.38889	*	0.968992		1.14286	*
Garb_16748	81	19627	7	1	1	83.12	9e-65	gi|255583146	protein translocase, putative	Ricinus communis	0.742942		1.00301		0.793651
cotton_GLEAN_10039967	80	120875	4.2	3	1	72.04	0	gi|225456711	PREDICTED: ABC transporter A family member 2 isoform 1	Vitis vinifera	0.671592		0.651466		0.654022
Garb_06051	76	88404	4.3	2	2	93.04	0	gi|255542844	importin alpha, putative	Ricinus communis	1.0582		1.13636		1.11235
Garb_19420	69	190968	3.4	4	4	86.96	2e-26	gi|359482646	PREDICTED: pleiotropic drug resistance protein 1-like	Vitis vinifera	0.750188		1.05263		0.898473
Garb_12258	69	69060	3.7	1	1	90.32	0	gi|256016311	importin alpha	Citrus sinensis	---		---		---
cotton_GLEAN_10034175	62	160021	3.3	2	1	82.69	0	gi|255582182	protein translocase, putative	Ricinus communis	---		---		---
Garb_08989	57	121060	4.1	3	1	71.74	0	gi|356516766	PREDICTED: ABC transporter A family member 2-like	Glycine max	---		---		---
Garb_24608	53	118814	2.4	2	2	79.69	2e-81	gi|297793725	hypothetical protein ARALYDRAFT_496338	Arabidopsis lyrata subsp. lyrata	1.24224		0.987167		1.09649
Garb_38498	52	28196	13.1	2	2	73.4	3e-76	gi|225451445	PREDICTED: mitochondrial import receptor subunit TOM20	Vitis vinifera	0.606796		0.881834		0.775194
Garb_01905	49	65003	1.9	1	1	86.78	0	gi|215271818	hexose transporter 1	Hevea brasiliensis	0.664452		0.853971		0.725689
Garb_24807	37	80557	3	1	1	93.38	3e-81	gi|117662504	ABC transporter-like protein	Cucumis sativus	---		---		---
cotton_GLEAN_10037762	37	23427	14.1	2	2	87.27	6e-80	gi|255538084	Adenine phosphoribosyltransferase, putative	Ricinus communis	1.94175		1.16686		1.52207
Garb_16515	33	41025	3.7	1	1	86.05	6e-106	gi|147839171	ABC transporter I family member 6, chloroplastic	Arabidopsis thaliana	---		---		---
Garb_03532	32	143649	1	1	1	92.08	0	gi|225454813	PREDICTED: exportin-1 isoform 1	Vitis vinifera	---		---		---
Garb_26296	24	111052	0.8	1	1	82.98	2e-16	gi|224086773	predicted small molecule transporter	Populus trichocarpa	---		---		---
					Vesicle sorting (21)
Garb_04646	244	224389	10.2	14	1	96.38	0	gi|255574808	clathrin heavy chain, putative	Ricinus communis	---		---		---
Garb_05025	189	119618	13.3	9	9	90.74	8e-18	gi|68566309	Dynamin-2A	Arabidopsis thaliana	0.888889		0.856898		0.995025
cotton_GLEAN_10011475	188	79433	14.7	7	6	98.92	0	gi|310722811	vacuolar invertase 1	Gossypium hirsutum	1.17371		1.11607		1.0917
cotton_GLEAN_10033673	187	194550	9	11	1	98.12	2e-83	gi|357492745	clathrin heavy chain, putative	Medicago truncatula	---		---		---
cotton_GLEAN_10007858	117	68794	12.5	5	2	87.99	0	gi|146286092	Coatomer subunit delta	Arabidopsis thaliana	0.675676		0.776398		0.815661
Garb_20974	99	148157	5.2	4	2	97.86	2e-139	gi|356547412	PREDICTED: coatomer subunit beta'-2-like	Glycine max	0.631313		0.928505		0.770416
Garb_27255	93	77785	6	3	2	96.44	0	gi|268526570	vacuolar invertase 2	Gossypium hirsutum	1.5083		1.06838		1.24533
Garb_25807	88	114573	7.8	5	5	96.1	6e-106	gi|75133394	Coatomer subunit gamma-2	Oryza sativa subsp. japonica	0.909091		0.927644		0.996016
cotton_GLEAN_10022975	85	99032	3.3	2	2	82.11	0	gi|255560015	AP-1 complex subunit gamma-2, putative	Ricinus communis	0.835422		0.938086		0.884173
cotton_GLEAN_10031981	85	157783	7.3	7	1	97.1	4e-33	gi|75337326	Coatomer subunit alpha-2	Arabidopsis thaliana	---		---		---
Garb_38620	82	44213	10	3	3	100	1e-37	gi|29836455	Putative syntaxin-24	Gossypium herbaceum	0.773994		0.675676	*	0.70028	*
Garb_38243	66	68608	13.7	5	2	86.04	0	gi|146286092	Coatomer subunit delta	Arabidopsis thaliana	1.27714		1.36054		1.33869
Garb_03649	56	113036	3.1	2	2	94.95	4e-99	gi|242035739	hypothetical protein SORBIDRAFT_01g035130	Sorghum bicolor	0.527426		0.755858	*	0.643087
Garb_15691	53	134337	1.4	1	1	86.86	0	gi|255573014	AP-2 complex subunit alpha, putative	Ricinus communis	---		---		---
Garb_13357	53	35132	6.4	2	2	82.35	1e-71	gi|79315832	vesicle associated protein	Arabidopsis thaliana	0.946074		0.774593		0.852515
Garb_30081	51	37038	9.1	2	2	80.82	9e-98	gi|255541652	syntaxin	Ricinus communis	1.55763		1.01729		1.24069
Garb_19449	48	49217	4.2	1	1	79.61	2e-58	gi|75158648	Putative lipid-binding protein At4g00165	Arabidopsis thaliana	---		---		---
Garb_35684	40	108249	1.5	1	1	85.11	3e-111	gi|71153400	Vacuolar-sorting receptor 1	Arabidopsis thaliana	---		---		---
Garb_32725	36	42949	8.8	2	2	78.05	4e-53	gi|28380129	Syntaxin-132	Arabidopsis thaliana	1.01523		0.910747		0.94697
Garb_00638	29	85059	1.6	1	1	87.4	0	gi|71153403	Vacuolar-sorting receptor 3	Arabidopsis thaliana]	---		---		---
Garb_18008	27	43695	3	1	1	85.11	4e-41	gi|29836463	putative syntaxin	Gossypioides kirkii	---		---		---
					Plasma membrane ATPase (6)
cotton_GLEAN_10028780	486	124416	17.5	13	4	95.26	0	gi|7105717	plasma membrane proton ATPase	Kosteletzkya virginica	1.917	*	1.547	*	1.732	*
Garb_30854	393	153861	10.3	9	2	95	2e-82	gi|75232938	Plasma membrane ATPase	Oryza sativa subsp. japonica	2.16		1.887	*	2.062
cotton_GLEAN_10008977	311	122926	7.3	6	1	92.59	0	gi|255552828	H(\+)-transporting atpase plant/fungi plasma membrane type, putative	Ricinus communis	---		---		---
Garb_06238	306	116320	7	6	1	82.88	1e-88	gi|255540887	H(\+)-transporting atpase plant/fungi plasma membrane type, putative	Ricinus communis	---		---		---
cotton_GLEAN_10025368	58	32853	17.3	2	2	89.29	2e-07	gi|75099946	Remorin	Solanum tuberosum	1.34771		1.06045		1.19617	*
Garb_03036	55	32057	9.5	1	1	87.23	1e-16	gi|34925093	Remorin	Solanum tuberosum	---		---		---
					Vacuolar ATPase (10)
Garb_01398	1280	80020	48.6	22	2	99.68	0	gi|401322	RecName: Full=V-type proton ATPase catalytic subunit A	Gossypium hirsutum	0.566572		0.765111		0.67981
cotton_GLEAN_10010706	1269	79769	48.5	22	2	100	2e-38	gi|1336803	vacuolar H(+)-ATPase subunit A	Gossypium hirsutum	1.751	*	1.589		1.635	*
Garb_02338	684	60915	28.3	9	1	99.37	1e-89	gi|374256049	putative nucleotide-binding subunit of vacuolar, partial	Elaeis guineensis	0.892061		1.08696		1.01626
Garb_05994	617	61819	28.1	9	1	99.74	0	gi|2493130	RecName: Full=V-type proton ATPase subunit B	Gossypium hirsutum	---		---		---
Garb_28582	104	48736	6.4	2	2	97.89	0	gi|111154399	vacuolar H+-ATPase subunit C	Gossypium hirsutum	1.14025		1.678	*	1.407
Garb_13145	74	16276	20.9	1	1	88.18	1e-33	gi|225439976|	V-type proton ATPase subunit G	Vitis vinifera	---		---		---
Garb_00098	47	18587	10.9	1	1	100	3e-15	gi|1575325	vacuolar H+-pumping ATPase 16 kDa proteolipid, partial	Arabidopsis thaliana	2.006		2.122		2.155	*
Garb_00513	44	91437	1.7	1	1	98.57	6e-73	gi|14149009	putative vacuolar-type H+-pyrophosphatase	Solanum pimpinellifolium	---		---		---
Garb_03549	32	60391	1.8	1	1	86.67	1e-49	gi|46911561	putative vacuolar ATPase subunit H	Populus deltoides x Populus maximowiczii	---		---		---
Garb_24628	29	37596	3.8	1	1	81.9	4e-125	gi|12643375	V-type proton ATPase subunit D	Arabidopsis thaliana	---		---		---
					ER membrane(1)
Garb_42978	130	37821	15	3	3	72.96	6e-109	gi|297837901	ER membrane protein complex subunit 10	Arabidopsis lyrata subsp. lyrata	0.776398		1.72712	*	1.25945
											Mitochondrial membrane (5)
cotton_GLEAN_10035066	638	34848	31.5	6	4	84.06	3e-123	gi|224102711	porin/voltage-dependent anion-selective channel protein	Populus trichocarpa	0.682594	*	0.895255		0.831947
Garb_23335	530	36312	26.4	6	3	84.42	3e-135	gi|224102515	porin/voltage-dependent anion-selective channel protein	Populus trichocarpa	0.40032		0.922509		0.693001
Garb_36951	449	35465	29	6	2	86.23	2e-129	gi|5031279	porin	Prunus armeniaca	1.23153		0.823723		0.995025
Garb_34108	100	36984	18.7	4	4	78.23	1e-123	gi|224125966	porin/voltage-dependent anion-selective channel protein	Populus trichocarpa	0.681663		0.932836		0.794913	*
Garb_05945	53	32488	10.2	2	1	77.22	2e-106	gi|224129860	porin/voltage-dependent anion-selective channel protein	Populus trichocarpa	---		---		---
					Plasma membrane (1)
Garb_07015	39	18269	9	1	1	92.31	1e-52	gi|255546205	hydrogen-transporting ATP synthase, rotational mechanism, putative	Ricinus communis	---		---		---
					Others (21)
cotton_GLEAN_10008387	716	32135	22.7	4	3	74.79	1e-103	gi|75273758	Cysteine-rich repeat secretory protein 38	Arabidopsis thaliana	0.545256	*	0.638978	*	0.627746	*
Garb_08537	341	35972	39.4	8	2	100	2e-149	gi|193290377	14-3-3b protein	Gossypium hirsutum	1.60256	*	0.656599		0.974659
cotton_GLEAN_10004130	326	35182	42.9	8	1	96.17	6e-146	gi|164652940	14-3-3d protein	Gossypium hirsutum	1.01626		0.831255		0.883392
Garb_24772	322	68786	14.3	6	6	85.29	2e-08	gi|189035981	Protein TolB	Dinoroseobacter shibae	0.838223		1.35135	*	1.20192
cotton_GLEAN_10027643	264	35008	32.4	7	2	99.62	3e-150	gi|302122828	14-3-3g protein	Gossypium hirsutum	1.34409		0.588928	*	0.959693
cotton_GLEAN_10001053	239	35476	29.8	7	1	100	2e-150	gi|164652942	14-3-3e protein	Gossypium hirsutum	---		---		---
cotton_GLEAN_10040721	229	35707	29.7	7	1	93.62	1e-117	gi|3912950	14-3-3-like protein E	Nicotiana tabacum	---		---		---
Garb_00619	199	35482	24.9	5	2	99.62	1e-150	gi|335356251	14-3-3-like protein 2	Gossypium hirsutum	1.30039		0.979432		1.27877
cotton_GLEAN_10037645	194	33768	27.8	6	2	100	3e-145	gi|302122826	14-3-3f protein	Gossypium hirsutum	0.92081		0.71582		0.800641
Garb_05057	191	34356	30.2	6	2	93.7	9e-127	gi|255545792	14-3-3 protein, putative	Ricinus communis	1.43062		0.985222		1.16822
Garb_22213	191	43716	20.1	5	1	99.59	2e-138	gi|164652938	14-3-3c protein	Gossypium hirsutum	1.5949		1.17096		1.34048
Garb_26514	172	16063	24.8	2	1	85.71	2e-15	gi|357453525	Cysteine-rich repeat secretory protein	Medicago truncatula	1.24688		0.856164		1.02145
cotton_GLEAN_10006406	171	34252	26.7	6	5	98.8	2e-143	gi|164652934	14-3-3a protein	Gossypium hirsutum	1.29366		0.832639		1.25313
cotton_GLEAN_10007281	99	46161	3.6	2	2	81.08	6e-11	gi|75206555	Clathrin light chain 1	Arabidopsis thaliana	0.531632		0.961538		0.802568
cotton_GLEAN_10011228	71	60704	2.2	1	1	47.34	7e-40	gi|75330985	Cysteine-rich receptor-like protein kinase 29	Arabidopsis thaliana	---		---		---
cotton_GLEAN_10030244	60	60801	6	2	2	91.07	6e-23	gi|81884113	Peroxisomal membrane protein PEX14	Rattus norvegicus	1.30548		1.10742		1.1976
Garb_19038	53	24222	5.4	1	1	95.7	2e-101	gi|71153349	PREDICTED: trafficking protein particle complex subunit 3	Vitis vinifera	---		---		---
Garb_38406	52	49886	3.4	1	1	72.61	2e-167	gi|224129714	flavine-containing monoxygenase	Populus trichocarpa	---		---		---
Garb_14695	39	24285	6	1	1	77.78	2e-33	gi|224059034	heavy metal ATPase	Populus trichocarpa	---		---		---
Garb_14418	28	55941	3	1	1	92.52	3e-53	gi|75170355	Sorting nexin 1	Arabidopsis thaliana	---		---		---
Garb_05076	21	77228	0.8	1	1	83.36	0	gi|255545892	TRANSPORT INHIBITOR RESPONSE 1 protein, putative	Ricinus communis	---		---		---
					Stress and defence (164)
Garb_33066	4118	38942	17.2	5	4	98.25	0	gi|19569160	apoplastic anionic gaiacol peroxidase	Gossypium hirsutum	1.34771		0.884173		1.11982
cotton_GLEAN_10004349	2898	21577	66	7	1	98.11	4e-87	gi||10505374	PR protein class 10	Gossypium hirsutum	1.41044		1.0582		1.22249
Garb_33533	2072	21758	49.7	6	1	94.34	9e-84	gi|354620267	pCPR10-16	Gossypium barbadense	1.632	*	1.819	*	1.6835	*
cotton_GLEAN_10004348	1592	21654	49.7	6	2	100	2e-88	gi||10505376	PR protein class 10	Gossypium hirsutum	1.14811		1.89036		1.38504
cotton_GLEAN_10013920	1421	21374	51.6	6	1	100	3e-60	gi|52632323	pathogenesis-related protein 10	Gossypium barbadense	---		---		---
Garb_05010	885	36259	42.3	8	8	97.9	6e-156	gi|34419961	POD9 precursor	Gossypium barbadense	0.807754		0.723066	*	0.738007
Garb_32668	831	17347	38.8	4	3	96.05	6e-78	gi|209419744	Cu/Zn superoxide dismutase	Gossypium arboreum	1.35318		0.75643		1.01317
Garb_32724	830	99281	17.1	10	6	98.17	0	gi|211906536	class III peroxidase	Gossypium hirsutum	1.5674	*	0.640615		0.953289
Garb_10751	797	69105	36.5	12	1	96.77	0	gi|211906492	dihydrolipoamide dehydrogenase	Gossypium hirsutum	0.380807		0.951475		0.704722
cotton_GLEAN_10021753	682	41610	23.6	6	4	85.06	1e-157	gi|211906540	class III peroxidase	Gossypium hirsutum	1.10497		1.14155	*	1.16686
Garb_14339	584	127896	1.3	1	1	80.98	0	gi|194321204	laccase	Gossypium hirsutum	3.023		0.857		1.68	*
Garb_40884	575	41445	29.7	9	8	80.27	5e-143	gi|357470271	Peroxidase	Medicago truncatula	2.067	*	1.2837	*	1.75131	*
cotton_GLEAN_10005369	551	43663	25.9	7	3	73.15	6e-141	gi|359485668	PREDICTED: peroxidase 27-like	Vitis vinifera	1.53846	*	0.505817		0.905797
cotton_GLEAN_10018238	547	46829	23.6	6	2	70.75	7e-125	gi|356503885	PREDICTED: peroxidase 3-like	Glycine max	1.49925	*	0.782473		1.20919
Garb_21667	530	24639	46.3	5	5	99.07	3e-110	gi|74229679	chloroplast Cu/ZnSOD	Gossypium hirsutum	1.01112		1.01626		1.01937
Garb_31105	506	43619	24.4	5	5	84.54	8e-104	gi|255557048	Peroxidase 21 precursor, putative	Ricinus communis	1.11483		1.01626		1.07759
Garb_05143	504	104134	8.5	5	3	73.83	4e-58	gi|356505491	PREDICTED: peroxidase 39-like	Glycine max	1.74825	*	0.806452		1.22399
cotton_GLEAN_10001343	501	22805	36	4	1	75.47	1e-60	gi|354620275	VdI2	Gossypium barbadense	0.493827		1.00908		0.761615	*
cotton_GLEAN_10012412	468	22061	44.7	5	1	98.11	7e-87	gi|354620269	pCPR10-12	Gossypium barbadense	0.70373	*	1.46628	*	1.21212	*
Garb_12824	464	18522	16.5	2	1	96.69	1e-78	gi|74229677	cytoplasmic Cu/ZnSOD	Gossypium hirsutum	7.707	*	0.940734		2.94	*
cotton_GLEAN_10010679	455	21577	9.8	2	2	77	2e-40	gi|7407641	pathogenesis-related protein 1	Betula pendula	1.35318		1.94553		1.91571
cotton_GLEAN_10001994	430	32984	26.9	6	6	76	7e-114	gi|26397630	Peroxidase 59	Arabidopsis thaliana	2.6738	*	0.984252		1.64474
cotton_GLEAN_10017701	403	29164	13.2	2	2	99.59	1e-121	gi|34538351	osmotin-like protein I	Gossypium hirsutum	0.838223		0.814332		0.856898	*
Garb_26254	402	19268	28.6	3	1	98.14	2e-85	gi|186886514	extracellular Cu/Zn superoxide dismutase	Gossypium hirsutum	---		---		---
cotton_GLEAN_10004991	401	59168	27.2	8	1	90.32	1e-93	gi|294805362	monodehydroascorbate reductase	Rosa roxburghii	---		---		---
Garb_29154	379	36729	15.5	4	2	84.42	4e-144	gi|26397635	Peroxidase 53	Arabidopsis thaliana	1.23916		1.30378	*	1.33869
Garb_34020	360	40527	21.3	6	5	86.81	1e-159	gi|19698452	bacterial-induced class III peroxidase	Gossypium hirsutum	1.37363	*	1.01937		1.17233
Garb_04479	347	22167	45.1	4	4	100	4e-89	gi|211906454	peroxiredoxin	Gossypium hirsutum	0.88968		1.02775		0.943396
Garb_23542	341	114829	14.2	9	3	88.5	4e-49	gi|220967704	monodehydroascorbate reductase	Solanum lycopersicum	0.332889	*	1.05504		0.667057	*
Garb_41320	334	41624	27.4	7	7	81.85	6e-138	gi|290760236	peroxidase	Bruguiera gymnorhiza	1.25628		0.884173		0.998004
Garb_13424	332	32393	38.2	6	3	99.59	5e-132	gi|211906476	ascorbate peroxidase	Gossypium hirsutum	0.68	*	1.45		1.0582
cotton_GLEAN_10022462	329	33496	32.8	5	2	99.6	1e-124	gi|148912162	cytosolic ascorbate peroxidase 1	Gossypium hirsutum	0.93985		0.756	*	0.848	*
Garb_09401	319	65413	19.4	6	1	93.36	2e-127	gi|255586766	monodehydroascorbate reductase, putative	Ricinus communis	1.06952		0.925069	*	0.979432
Garb_35748	315	40269	16.5	4	2	80.52	5e-149	gi|211906536	class III peroxidase	Gossypium hirsutum	1.71527	*	0.851789		1.33511	*
cotton_GLEAN_10003328	303	42335	41.3	9	2	84.95	1e-140	gi|19698446	class III peroxidase	Gossypium hirsutum	1.30039		1.18765		1.27226
cotton_GLEAN_10005573	301	41050	20.7	4	1	66.98	2e-118	gi|26397647	Peroxidase 57	Arabidopsis thaliana	---		---		---
cotton_GLEAN_10033972	299	39871	13.2	4	1	80.97	5e-96	gi|89276748	peroxidase	Litchi chinensis	4.36681		1.83824	*	2.86533
Garb_33451	298	43498	26.9	6	2	67.3	9e-93	gi|25453224	Peroxidase 24	Arabidopsis thaliana	0.600601	*	2.04499	*	1.10619
cotton_GLEAN_10008709	279	29251	8.9	2	2	83.76	6e-98	gi|255537367	Osmotin precursor, putative	Ricinus communis	0.941		2.1955	*	1.714	*
Garb_14338	279	34578	4.7	1	1	50	6e-76	gi|255572377	laccase, putative	Ricinus communis	1.10619		0.719424	*	0.906618
Garb_16077	276	42324	20.2	5	1	71.6	4e-130	gi|225447324	PREDICTED: peroxidase 27	Vitis vinifera	1.03306		0.610128		0.778816
Garb_35770	274	28726	20.4	4	2	82.61	4e-65	gi|75259589	Germin-like protein 5-1	Oryza sativa subsp. japonica	2.51889	*	1.18343	*	1.69779
Garb_26640	274	17273	30.8	3	2	70.44	3e-58	gi|15811629	ribonuclease-like PR-10	Gossypium arboreum	0.848		2.847	*	1.797	*
Garb_37488	273	38672	21.8	5	4	75.26	3e-128	gi|225439627	cationic peroxidase 1	Vitis vinifera	1.03734		1.0661		1.08578	*
cotton_GLEAN_10016977	273	39894	16.6	4	1	93.18	1e-159	gi|211906538	class III peroxidase	Gossypium hirsutum	2.47525	*	1.60256		1.95695
cotton_GLEAN_10023951	260	42570	20.2	5	1	71.3	2e-130	gi|225447324	PREDICTED: peroxidase 27	Vitis vinifera	0.788644		0.668449		0.674309	*
cotton_GLEAN_10039822	249	34792	24.2	5	1	84.78	2e-10	gi|383081955	peroxidase 1, partial	Eucalyptus pilularis	1.75131		0.994036		1.30719
Garb_01641	244	71821	13.9	5	4	80.45	0	gi|255539757	multicopper oxidase, putative	Ricinus communis	1.31926		1.16009		1.3587
cotton_GLEAN_10033026	242	42013	20.3	4	3	76.74	2e-13	gi|194466213	latex-abundant protein	Arachis hypogaea	1.02669		1.12994		1.08578
Garb_32911	241	59833	26.7	8	5	89.17	0	gi|146432261	monodehydroascorbate reductase	Vitis vinifera	0.557724	*	0.904159		0.679348	*
cotton_GLEAN_10025316	227	23999	26.2	3	3	70.88	3e-71	gi|130718	Acid phosphatase 1	Solanum lycopersicum	1.34048		1.31406	*	1.34048
Garb_38204	216	39915	6.5	2	1	74.84	5e-133	gi|115345276	peroxidase	Populus alba	3.19489		0.94697		1.66667	*
Garb_20707	212	73744	13.5	6	3	86.05	7e-13	gi|255561582	Patellin-3, putative	Ricinus communis	0.446		0.639795	*	0.546747	*
Garb_01046	207	92874	11.6	7	7	87.23	1e-69	gi|34099837	sulfite reductase	Populus tremula x Populus alba	1.5873	*	0.931966		1.19904
Garb_21995	206	40541	19.9	5	5	76.17	5e-116	gi|73913500	peroxidase	Phaseolus lunatus	1.57729	*	1.231		1.673	*
Garb_40675	204	28638	20.5	4	2	79.4	1e-88	gi|196122036	germin-like protein 16	Glycine max	2.5		1.90114		2.14592
Garb_26131	204	17569	27.4	2	2	99.19	6e-45	gi|383932370	nodulin-like protein	Gossypium hirsutum	0.879		0.498008		0.611995	*
cotton_GLEAN_10015273	199	41849	12.2	3	2	67.68	2e-127	gi|255551599	Peroxidase 27 precursor, putative	Ricinus communis	1.51745	*	1.99203	*	1.981	*
Garb_10901	198	38931	10.6	3	2	96.89	4e-167	gi|32351452	class III peroxidase	Gossypium hirsutum	2.15983	*	1.55763	*	1.80505	*
cotton_GLEAN_10000508	180	66067	12.2	5	1	72.45	0	gi|150383842	Laccase-22	Oryza sativa subsp. japonica	1.01317		0.994036		0.980392
cotton_GLEAN_10021654	163	47046	14.5	3	3	69.23	6e-92	gi|75295505	Momilactone A synthase	Oryza sativa subsp. japonica	0.783085		0.849618		0.865052
Garb_02995	159	32507	19.3	2	2	76.75	3e-84	gi|255576715	translocon-associated protein, alpha subunit, putative	Ricinus communis	1.11111		0.786782		0.923361
Garb_41622	158	22338	19.1	3	1	97.45	4e-78	gi|354620271	MLP	Gossypium barbadense	0.783699	*	0.505561	*	0.625391	*
cotton_GLEAN_10033988	156	26223	30.9	5	5	75.35	2e-89	gi|255540843	Rhicadhesin receptor precursor, putative	Ricinus communis	0.596303		1.42045	*	1.1976
Garb_20222	154	20162	12.4	2	1	95.98	2e-92	gi|65998365	dirigent-like protein	Gossypium barbadense	3.517	*	1.34771		1.788	*
Garb_06127	152	33807	19.8	4	4	74.62	3e-114	gi|255581003	Peroxidase 2 precursor, putative	Ricinus communis	0.47259	*	3.24675	*	1.643	*
cotton_GLEAN_10040402	146	64425	13.3	4	2	86.68	0	gi|356508933	PREDICTED: L-ascorbate oxidase homolog	Glycine max	0.92081		1.37363	*	1.17786
Garb_20704	146	82082	13.8	6	1	86.8	3e-172	gi|255561576	Patellin-5, putative	Ricinus communis	0.426257		1.07759		0.782473
Garb_10856	145	22505	28.2	3	3	87.73	3e-81	gi|85701293	PITH domain-containing protein At3g04780	Arabidopsis thaliana	0.801282		0.675219	*	0.73046	*
Garb_20230	144	19410	12.6	2	1	97.13	2e-94	gi|66276977	dirigent-like protein	Gossypium barbadense	2.845	*	1.23457	*	1.84843	*
Garb_09174	140	30376	25.6	3	3	86.59	8e-79	gi|75119143	Peroxiredoxin-2E-1, chloroplastic	Oryza sativa subsp. japonica	0.373552		0.969932		0.761615
Garb_14568	137	74379	9.2	3	2	76.3	2e-131	gi|225451467	PREDICTED: peroxidase 55-like	Vitis vinifera	0.764526		0.925926		0.845309	*
Garb_14007	136	29774	27.4	4	1	80.5	6e-73	gi|29419473	glutathione S-transferase F1	Malva pusilla	1.08578		1.03306		1.05042
Garb_05187	136	43741	14.5	3	2	98.18	0	gi|211906532	class III peroxidase	Gossypium hirsutum	1.23609	*	0.670691	*	0.856898
cotton_GLEAN_10038611	136	52603	10.8	3	1	89.47	1e-22	gi|226525450	disease-resistance protein SGT1	Saccharum officinarum	1.00301		1.37931		1.18483
Garb_13468	135	30653	20.8	4	4	83.49	6e-104	gi|321440548	dehydroascorbate reductase	Theobroma cacao	0.614	*	1.59		1.102
cotton_GLEAN_10012655	130	32999	18.7	3	3	97.33	4e-126	gi|195973264	glutathione S-transferase	Gossypium hirsutum	1.966	*	1.622	*	1.648	*
Garb_21449	128	53016	11.9	3	2	81.88	3e-66	gi|194466213	latex-abundant protein	Arachis hypogaea	1.1534		0.995025		1.03413
cotton_GLEAN_10018216	128	29699	27.4	4	1	81.76	2e-75	gi|29419473	glutathione S-transferase F1	Malva pusilla	1.16822		1.12233		1.13766
Garb_07167	121	30595	28.4	5	5	81.52	5e-100	gi|255578691	glutathione-s-transferase theta, gst, putative	Ricinus communis	1.10497		1.26103		1.00908
Garb_30095	117	42248	12.5	3	3	81.71	7e-158	gi|25453205	Peroxidase 12	Arabidopsis thaliana	2.122	*	1.428		1.7	*
cotton_GLEAN_10006172	115	65913	21.5	6	1	86.51	6e-171	gi|255561576	Patellin-5, putative	Ricinus communis	---		---		---
Garb_14866	115	28877	15.3	3	3	96.83	8e-116	gi|33338347	osmotin-like pathogenesis-related protein	Gossypium hirsutum	0.683995		2.337	*	1.5456	*
Garb_27162	113	27022	20.7	3	3	88.39	9e-55	gi|389621839	mitochondrial peroxiredoxin IIF, partial	Acer platanoides	1.3089		0.83612		1.05263
cotton_GLEAN_10021203	107	99608	6.1	4	4	76.17	0	gi|227053577	subtilisin-like serine protease	Carica papaya	0.611621		0.851064		0.712251
cotton_GLEAN_10040425	105	41635	12	3	1	84.54	3e-148	gi|225626267	peroxidase	Populus trichocarpa	1.21212	*	0.882613		1.01937
Garb_24140	104	24906	17.9	2	2	96.77	3e-10	gi|294884563	translationally controlled tumor-like protein, partial	Tachigali melinonii	1.04058		0.688705		0.809061
cotton_GLEAN_10010587	104	40519	21.2	5	4	99.68	2e-176	gi|211906546	class III peroxidase	Gossypium hirsutum	0.758725		1.00806		0.881834
Garb_34246	102	22656	21.7	3	3	100	1e-87	gi|354620273	MLP-like protein	Gossypium barbadense	1.25313		0.628141	*	0.92081
Garb_13629	98	26785	12.4	2	2	72.36	4e-81	gi|255558354	Nectarin-1 precursor, putative	Ricinus communis	0.805802		0.517063		0.634921
Garb_17269	97	37281	20.5	4	4	68.61	2e-109	gi|118926	Desiccation-related protein PCC13-62	Craterostigma plantagineum	1.5674		1.97	*	2.23714	*
Garb_25422	96	39701	17	3	3	78.64	2e-126	gi|26397723	Peroxidase 55	Arabidopsis thaliana	1.10865		0.655308	*	0.816327	*
cotton_GLEAN_10016101	96	26060	14.7	2	1	67.21	5e-69	gi|225455388	PREDICTED: germin-like protein 11-1	Vitis vinifera	0.817661		0.467946	*	0.602773	*
Garb_11362	95	67999	6.6	3	1	76.19	0	gi|255579138	laccase, putative	Ricinus communis	---		---		---
Garb_36351	95	27393	4.4	1	1	82.41	1e-88	gi|18202905	Germin-like protein subfamily 1 member 14	Arabidopsis thaliana	1.28866		1.22699		1.31579
Garb_05304	95	28761	8.5	1	1	83.25	8e-97	gi|255537367	Osmotin precursor, putative	Ricinus communis	1.784		1.741		1.78	*
cotton_GLEAN_10004040	93	64605	9.3	4	2	99.38	0	gi|1345674	RecName: Full=Catalase isozyme 1	Glycine max	0.83682		0.648088		0.713267
cotton_GLEAN_10006425	93	63259	10.1	3	3	86.89	4e-104	gi|356600155	acid phosphatase [Citrus maxima]	Citrus maxima	0.586166		0.777605		0.69735
Garb_26095	91	45895	13.6	3	3	98.29	1e-162	gi|211906478	stromal ascorbate peroxidase	Gossypium hirsutum	0.965251		0.774593		0.844595
cotton_GLEAN_10027005	89	40841	14.6	4	2	99.7	0	gi|315307494	gaiacol peroxidase	Gossypium hirsutum	0.895255		1.45349		1.11857
Garb_13429	89	74909	2.1	1	1	77.51	0	gi|2493321	L-ascorbate oxidase	Nicotiana tabacum	0.725689		1.03627		0.940734
Garb_19635	87	35868	15.8	4	1	98.92	3e-163	gi|211906544	class III peroxidase	Gossypium hirsutum	---		---		---
Garb_25421	87	43411	9.6	2	1	73.03	2e-123	gi|26397661	Peroxidase 73	Arabidopsis thaliana	---		---		---
cotton_GLEAN_10013496	87	38739	7	2	1	99.69	0	gi|324984191	bacterial-induced peroxidase	Gossypium raimondii	---		---		---
cotton_GLEAN_10022275	86	32350	18.5	4	2	86.67	1e-41	gi|257222612	phospholipid hydroperoxide glutathione peroxidase	Nicotiana benthamiana	1.06496		1.46413		1.287
cotton_GLEAN_10001109	85	28343	20.4	3	3	100	2e-103	gi|29836437	putative germin E protein precursor	Gossypium raimondii	0.656168		0.684463	*	0.69979
Garb_11272	84	38318	10	2	1	86.67	6e-07	gi|82233915	Putative oxidoreductase GLYR1	Gallus gallus	0.627746		0.791139		0.713267
Garb_40095	82	70060	11.6	4	4	76.65	2e-89	gi|359480830	PREDICTED: LOW QUALITY PROTEIN: L-ascorbate oxidase-like	Vitis vinifera	1.465		1.62075	*	1.56495	*
Garb_00057	80	46794	13.9	3	3	83.5	7e-149	gi|26397658	Peroxidase 64	Arabidopsis thaliana	1.45138		1.56006	*	1.59744
Garb_17208	80	22953	11	1	1	93.29	7e-87	gi|166203457	universal stress protein 1	Gossypium arboreum	1.13895		2.741	*	1.947	*
Garb_38448	77	64553	7.5	3	3	88.1	0	gi|224057577	glutathione reductase	Populus trichocarpa	2.439	*	1.56		1.992	*
cotton_GLEAN_10012983	76	52577	8.8	2	2	90.24	5e-30	gi|361068627	Pinus taeda anonymous locus CL892Contig1_03 genomic sequence	Oryza sativa subsp. japonica	0.805802		1.06838		0.933707
cotton_GLEAN_10012646	73	36837	19.2	4	2	74.75	6e-41	gi|151368166	glutathione S-transferase, partial	Gossypium barbadense	0.747943		0.862069		0.784929
cotton_GLEAN_10007151	72	45240	4.1	1	1	88.46	5e-33	gi|121489741	dihydropicolinate synthase (DHDPS) precursor	Phillyrea latifolia	0.736377		1.60256		1.20048
Garb_30913	70	24947	7.8	1	1	86.36	1e-15	gi|82654928	Chitinase 3	Oryza sativa subsp. japonica	1.80505		1.20919	*	1.44928
cotton_GLEAN_10010212	70	25227	14.6	2	2	80.95	3e-78	gi|225436960	PREDICTED: probable glutathione peroxidase 4	Vitis vinifera	0.803859		0.702741		0.736377
cotton_GLEAN_10037202	69	40721	5.2	1	1	82.06	6e-139	gi|225445501	PREDICTED: peroxidase 25	Vitis vinifera	---		---		---
Garb_16249	69	52372	10.6	2	2	66.58	3e-149	gi|122217718	Patatin-3-Kuras 1	Solanum tuberosum	0.677048		0.929368		0.851789
Garb_24134	67	22734	8.7	1	1	99.34	5e-81	gi|38016525	fiber protein Fb19, partial	Gossypium barbadense	---		---		---
Garb_00022	62	64078	7.6	3	1	99.59	0	gi|231688	RecName: Full=Catalase isozyme 2	Gossypium hirsutum	---		---		---
Garb_15862	62	33665	9.3	2	2	71.3	1e-83	gi|225424859	PREDICTED: glutathione S-transferase U17 isoform 1	Vitis vinifera	1.62866		0.888889		1.07296
Garb_36967	62	55620	2.9	1	1	83.82	6e-91	gi|18203443	Germin-like protein subfamily 1 member 7	Arabidopsis thaliana	0.633312		1.40647	*	1.15473
cotton_GLEAN_10021919	59	63991	9.4	3	3	91.59	6e-51	gi|186920319	glutathione reductase	Hevea brasiliensis	1.667	*	0.9285		1.298
Garb_04312	59	24561	11.6	2	2	95.79	8e-105	gi|256010124	dirigent-like protein 1	Gossypium barbadense	2.1322		2.88184	*	2.42718
Garb_06868	57	56915	12.8	4	4	96.53	2e-147	gi|190895984	NAC domain protein	Populus tremula	1.32275		1.0352		1.05042
Garb_17292	57	24353	15.4	3	1	89.58	1e-73	gi|125620186	glutathione peroxidase	Nelumbo nucifera	---		---		---
cotton_GLEAN_10017472	51	34630	8.5	1	1	49.81	9e-63	gi|224145241	multicopper oxidase	Populus trichocarpa	---		---		---
Garb_31637	50	41132	10.1	3	1	99.39	0	gi|315307488	gaiacol peroxidase	Gossypium hirsutum	---		---		---
Garb_16863	50	30179	5.8	1	1	65.35	2e-59	gi|75268180	Putative syntaxin-24	Arabidopsis thaliana	0.845309		0.833333		0.827815
Garb_08677	50	37644	2.9	1	1	81.33	3e-107	gi|190613919	putative allergen Pru p 2.04	Prunus dulcis x Prunus persica	---		---		---
Garb_29702	50	50982	12.5	3	3	97.27	2e-147	gi|94717590	GDP-mannose 3,5-epimerase 2	Oryza sativa subsp. japonica	1.36799		1.628	*	1.52905	*
Garb_20325	49	30394	14.4	2	2	78.41	4e-105	gi|350535593	osmotin-like protein precursor	Solanum lycopersicum	---		0.769823		0.444444
Garb_16758	49	20145	14.2	2	2	99.31	8e-41	gi|126075	Late embryogenesis abundant protein D-113;	Gossypium hirsutum	0.193836	*	0.0330066		0.0655695
Garb_06170	47	64395	3	1	1	85.71	0	gi|75206199	Laccase-5	Arabidopsis thaliana	---		---		---
Garb_15885	47	20757	9.3	1	1	99.34	8e-82	gi|1170745	RecName: Full=Late embryogenesis abundant protein Lea14	Gossypium hirsutum	1.17647		0.560538		0.789889
Garb_07699	47	74104	2.8	1	1	65	2e-07	gi|218184843	hypothetical protein OsI_34243	Oryza sativa Indica Group	---		---		---
Garb_11223	45	132221	1.3	1	1	86.41	0	gi|224139028	laccase 1b	Populus trichocarpa	---		---		---
Garb_02788	45	185817	1.9	2	2	94.2	1e-28	gi|359482646	PREDICTED: pleiotropic drug resistance protein 1-like	[Vitis vinifera	0.714796		0.904159	*	0.795545
Garb_11708	43	34162	4.1	1	1	66.67	8e-07	gi|2865523	cold regulated LTCOR18	Lavatera thuringiaca	---		---		---
Garb_41064	43	27005	10.6	2	2	75.12	1e-85	gi|255560323	Rhicadhesin receptor precursor, putative	Ricinus communis	---		0.564972		0.36324
Garb_15290	43	93453	1.6	1	1	82.63	0	gi|255554849	multicopper oxidase, putative	Ricinus communis	---		---		---
cotton_GLEAN_10025039	42	40108	7.6	2	2	74.44	1e-134	gi|225446934	PREDICTED: epoxide hydrolase 2	Vitis vinifera	0.483092		1.17647		0.860585
Garb_12568	42	40021	3	1	1	82.02	3e-109	gi|56404320	Copper chaperone for superoxide dismutase	Sus scrofa	1.47929		0.805802		1.06496
cotton_GLEAN_10017614	41	18886	9.2	1	1	84.54	3e-44	gi|297808117	hypothetical protein ARALYDRAFT_910087	Arabidopsis lyrata subsp. lyrata	---		---		---
Garb_23896	40	36263	5.8	1	1	83.98	7e-101	gi|27735265	Thaumatin-like protein	Arabidopsis thaliana	---		---		---
Garb_20743	40	40811	6.9	2	2	74.69	5e-100	gi|255579234	Peroxidase 2 precursor, putative	Ricinus communis	1.3369		2.18341		1.72712
Garb_11305	39	113886	2.9	2	2	90.72	3e-47	gi|380862962	glutathione reductase, partial	Dimocarpus longan	0.484731		2.05761		1.34409
Garb_29219	36	23366	5.7	1	1	84.38	7e-43	gi|1706282	Disease resistance response protein 206	Pisum sativum	0.798085		0.893655		0.881057
Garb_31367	35	30064	4.5	1	1	75.59	2e-85	gi|255541314	glutathione-s-transferase theta, gst, putative	Ricinus communis	---		---		---
cotton_GLEAN_10036499	35	34269	3.4	1	1	78.16	2e-122	gi|324984189	bacterial-induced peroxidase	Gossypium herbaceum subsp. africanum	---		---		---
Garb_35650	34	120180	1.9	1	1	98	2e-20	gi|16973320	salt inducible-like protein, partial	Gossypium hirsutum	---		---		---
Garb_26718	33	95521	1.6	1	1	94.44	2e-26	gi|110810580	Neutral ceramidase	Arabidopsis thaliana	0.65703	*	1.09529		0.907441	*
Garb_24826	33	70595	2.4	1	1	64.94	0	gi|255567618	laccase, putative	Ricinus communis	---		---		---
Garb_36934	31	27573	4	1	1	83.71	6e-82	gi|18202905	Germin-like protein subfamily 1 member 14	Arabidopsis thaliana	---		---		---
cotton_GLEAN_10024995	31	30554	4.6	1	1	88.99	1e-111	gi|29420155	glutathione S-transferase Z1	Malva pusilla	---		---		---
Garb_11114	31	22281	5.3	1	1	90.41	1e-74	gi|255577761	glutathione peroxidase, putative	Ricinus communis	---		---		---
cotton_GLEAN_10022273	29	22574	9.7	1	1	85.43	1e-73	gi|224058527	glutathione peroxidase	Populus trichocarpa	---		---		---
Garb_27631	29	31458	6.5	1	1	99.48	3e-109	gi|3219353	manganese superoxide dismutase	Gossypium hirsutum	---		---		---
Garb_27905	28	44560	3.5	1	1	86.14	5e-142	gi|255585293	Late embryogenesis abundant protein Lea14-A, putative	Ricinus communis	---		---		---
Garb_24440	28	52424	5	1	1	90.07	0	gi|255762690	sulfite oxidase	Hibiscus cannabinus	---		---		---
Garb_31378	26	32984	2.3	1	1	83.11	4e-107	gi|29419702	glutathione S-transferase U1	Malva pusilla	---		---		---
cotton_GLEAN_10036207	26	62154	3.2	1	1	84.72	1e-29	gi|380863106	glutathione synthetase, partial	Dimocarpus longan	---		---		---
Garb_28365	81	19513	8.3	3	1	68.14	5e-38	gi|4701228581	PREDICTED: protein PLANT CADMIUM RESISTANCE 2-like isoform 1	Fragaria vesca subsp. vesca	2.287	*	1.631	*	1.919	*
Garb_16483	255	64996	4.6	2	1	77.17	0	gi|75099392	Subtilisin-like protease	Arabidopsis thaliana	1.992	*	1.641	*	1.832	*
					Cell wall and cytoskeleton metabolism(109)
					Cell Wall related (33)
Garb_19713	457	29881	28.3	4	1	98.67	1e-107	gi|157273642	fasciclin-like arabinogalactan protein 4	Gossypium hirsutum	0.583431	*	0.775194		0.602773	*
cotton_GLEAN_10015912	454	29837	28.3	4	1	99.56	9e-109	gi|150416583	fasciclin-like arabinogalactan protein 11	Gossypium hirsutum	0.613699	*	0.689889	*	0.652	*
Garb_11764	311	85050	12.2	5	2	94.36	0	gi|33391721	beta-D-glucosidase	Gossypium hirsutum	1.7301	*	0.892857		1.31579	*
cotton_GLEAN_10033278	303	54118	20.2	7	7	68.26	3e-166	gi|255557765	pectin acetylesterase, putative	Ricinus communis	1.72117	*	0.987167		1.25156
Garb_27514	248	29303	15.6	2	1	100	2e-93	gi|30841338	arabinogalactan protein	Gossypium hirsutum	2.29358	*	1.26582		1.32979
cotton_GLEAN_10007157	227	47030	9.8	3	3	98.5	6e-174	gi|157273658	fasciclin-like arabinogalactan protein 12	Gossypium hirsutum	3.40136		1.40056		2.23714
cotton_GLEAN_10014886	220	29592	15.6	2	1	99.18	1e-92	gi|150416579	arabinogalactan protein 2	Gossypium hirsutum	3.08642		1.03413		1.64474
Garb_11593	215	60773	15.8	5	5	98.19	0	gi|157273656	fasciclin-like arabinogalactan protein 11	Gossypium hirsutum	1.3587		1.04932		1.19617
Garb_32655	200	48867	23	7	5	98.63	0	gi|253509569	caffeic acid O-methyltransferase 2	Gossypium hirsutum	0.784929		0.614251	*	0.682128	*
Garb_33773	184	122259	5.9	4	4	76.61	1e-177	gi|75265632	Beta-galactosidase 9	Arabidopsis thaliana	2.30415	*	0.954198		1.30548
Garb_01587	171	48658	18.4	5	3	93.8	0	gi|253509567	caffeic acid O-methyltransferase 1	Gossypium hirsutum	1.49701	*	1.15875		1.31579	*
Garb_02137	159	110450	6.6	3	3	80.29	0	gi|359478691	beta-galactosidase 8-like	Vitis vinifera	1.23609	*	1.00604		1.04822
Garb_29621	142	53478	12.2	3	1	82.19	4e-27	gi|357442057	Polygalacturonase-like protein	Medicago truncatula	1.1236		0.646412		0.832639
Garb_37317	128	93170	11.4	7	7	73.02	3e-132	gi|255572557	beta-glucosidase, putative	Ricinus communis	0.711744		0.965251		0.854701
Garb_17034	116	54934	13	3	3	99.27	0	gi|157273666	fasciclin-like arabinogalactan protein 16	Gossypium hirsutum	1.85	*	1.257	*	1.5625	*
Garb_27322	105	42298	12.7	3	3	97.08	3e-175	gi|124488476	phenylcoumaran benzylic ether reductase-like protein	Gossypium hirsutum	0.650195		1.16959		1.04275
Garb_05809	101	33569	15.3	3	3	98.79	1e-142	gi|229368460	caffeoyl CoA O-methyltransferase 2	Gossypium hirsutum	0.646412		0.749064		0.61237
cotton_GLEAN_10018582	85	33568	15.9	3	3	88.19	1e-103	gi|157273646	fasciclin-like arabinogalactan protein 6	Gossypium hirsutum	2.719	*	0.931099		1.711	*
Garb_23555	81	90357	2.8	2	1	99.55	0	gi|283488501	rhamnose synthase	Gossypium hirsutum	1.35135	*	1.05374		1.17925
cotton_GLEAN_10029477	76	30995	13.7	2	2	100	1e-81	gi|150416581	arabinogalactan protein 3	Gossypium hirsutum	2.88184		1.18483		1.53139
Garb_25221	75	51074	9.3	3	2	78.03	3e-168	gi|109509148	pectin acetylesterase	Eucalyptus globulus subsp	1.58228	*	1.02354		1.15875
Garb_25174	73	66299	4.6	2	2	99.5	1e-87	gi|29836525	putative pollen surface protein	Gossypium herbaceum	1.09529	*	0.729927	*	0.880282	*
cotton_GLEAN_10040764	73	31897	12	2	2	80	4e-79	gi|157273640	fasciclin-like arabinogalactan protein 3	Gossypium hirsutum	2.773	*	0.878		1.574	*
Garb_27066	72	93231	3.4	2	2	83.78	5e-98	gi|51507369	beta-xylosidase	Pyrus communis	0.618812		0.81103		0.728863
Garb_33627	65	33270	14	3	3	100	4e-112	gi|157273638	fasciclin-like arabinogalactan protein 2	Gossypium hirsutum	4.992	*	1.24		3.059	*
Garb_17189	60	57882	5	2	1	77.81	6e-174	gi|255548207	pectin acetylesterase, putative	Ricinus communis	---		---		---
cotton_GLEAN_10023074	58	50602	5.6	2	2	99.29	0	gi|157273660	fasciclin-like arabinogalactan protein 13	Gossypium hirsutum	3.256	*	1.41443		2.124	*
Garb_07920	55	29411	13	2	2	100	5e-124	gi|150416577	arabinogalactan protein 4	Gossypium hirsutum	1.71233		0.8285		1.14548
Garb_02499	41	33829	3.7	1	1	85.6	1e-121	gi|75309838	Uncharacterized protein At1g32220, chloroplastic	Arabidopsis thaliana	---		---		---
Garb_01878	38	33497	5.1	1	1	76.08	1e-113	gi|255556005	Stem-specific protein TSJT1, putative	Ricinus communis	---		---		---
Garb_02596	37	96866	1.7	1	1	70.78	0	gi|122247496	Beta-galactosidase 5	ryza sativa subsp. japonica	---		---		---
cotton_GLEAN_10024521	35	94924	1.9	1	1	82.09	0	gi|2209358	beta-D-galactosidase	Mangifera indica	---		---		---
Garb_10491	28	127252	1.8	1	1	91.29	0	gi|345104259	beta-mannosidase	Gossypium barbadense	---		---		---
					actin related (6)
Garb_11569	711	142031	12.7	11	1	98.94	0	gi|225448323	PREDICTED: actin-101	Vitis vinifera	1.7094		2.48756		2.079
cotton_GLEAN_10011755	601	48301	36.9	11	1	99.2	0	gi|356874568	actin	Chrysanthemum seticuspe f. boreale	---		---		---
Garb_15768	527	104171	15.9	10	1	97.88	0	gi|231496	RecName: Full=Actin-58	Vitis vinifera	2.10526		1.76367	*	1.87266
cotton_GLEAN_10014637	338	131382	15.9	11	1	87.79	6e-86	gi|117553550	actin-binding protein ABP29	Vitis vinifera	0.517866		0.648508		0.601323	*
Garb_02475	171	21411	44.4	4	4	100	3e-77	gi|89212812	actin depolymerizing factor 2	Gossypium hirsutum	1.487	*	1.741	*	1.524	*
Garb_04328	100	86296	6	3	3	90.8	1e-159	gi|182627650	Actin-related protein 2	Oryza sativa subsp. indica	1.78253		1.30208	*	1.50309	*
					tubulin (8)
cotton_GLEAN_10030112	976	256396	22.4	27	12	73.85	8e-06	gi|255560900	Microtubule-associated protein futsch, putative	Ricinus communis	1.07066		0.637349	*	0.76746	*
cotton_GLEAN_10018468	701	55731	27.4	9	1	100	0	gi|166343823	beta-tubulin 2	Gossypium hirsutum	---		---		---
Garb_42830	678	55793	27.2	9	1	99.77	0	gi|166343825	beta-tubulin 4	Gossypium hirsutum	---		---		---
Garb_12510	614	55209	19.5	7	1	100	0	gi|223453022	beta-tubulin 3	Gossypium hirsutum	---		---		---
Garb_05293	610	54964	18.7	6	1	99.77	0	gi|54036488	RecName: Full=Tubulin beta-7 chain; AltName: Full=Beta-7-tubulin	Gossypium hirsutum	---		---		---
Garb_20851	573	56239	25.3	8	2	100	0	gi|134035508	alpha-tubulin	Gossypium hirsutum	0.642	*	0.623		0.632
Garb_27782	437	55984	20.9	7	3	99.77	0	gi|54036489	RecName: Full=Tubulin beta-6 chain; AltName: Full=Beta-6-tubulin	Gossypium hirsutum	0.853971		0.924214		0.95511
Garb_05295	436	55543	22.7	7	1	99.77	0	gi|166343837	beta-tubulin 15	Gossypium hirsutum	---		---		---
					cytoskeleton binding (62)
Garb_10818	734	35721	27.6	6	6	91.98	2e-140	gi|3334147	RecName: Full=Endochitinase 1; Flags: Precursor	Gossypium hirsutum	0.801925		1.47275		1.26743
Garb_29164	727	90469	33.8	15	3	96.4	0	gi|211906506	luminal binding protein	Gossypium hirsutum	0.908265		0.772798		0.761615	*
Garb_14534	571	16761	39.9	3	1	74.58	1e-41	gi|255563618	glycine-rich RNA-binding protein, putative	Ricinus communis	1.43062	*	0.97561		1.16414	*
Garb_31081	469	86889	24.3	11	11	82.85	0	gi|255584904	Xylem serine proteinase 1 precursor, putative	Ricinus communis	1.47493	*	1.06496		1.22249
Garb_30554	439	19242	36.9	3	3	77.33	5e-22	gi|121631	Glycine-rich protein 2	Nicotiana sylvestris	1.17096		0.923361		1.02459
Garb_21515	356	106012	13.8	8	8	96.65	0	gi|225440045	cell division cycle protein 48 homolog	Vitis vinifera	0.463177	*	1.10742		0.791139
Garb_41268	325	76928	22.5	10	2	75.09	0	gi|375300670	cell wall invertase	Manihot esculenta	0.470146		1.19048		0.912409
cotton_GLEAN_10039929	286	30283	27.3	4	1	74.8	2e-47	gi|255547195	glycine-rich RNA-binding protein, putative	Ricinus communis	1.75439	*	1.31506		1.5015	*
Garb_25063	272	30012	27.4	4	1	73.17	4e-46	gi|255547195	glycine-rich RNA-binding protein, putative	Ricinus communis	1.64745	*	1.22699	*	1.40449	*
cotton_GLEAN_10033368	254	42049	18.5	4	2	68.91	8e-133	gi|44889026	Glucan endo-1,3-beta-glucosidase, basic vacuolar isoform	Hevea brasiliensis	0.674309		0.904977		0.825083	*
cotton_GLEAN_10030549	253	18045	29	3	3	100	2e-43	gi|211906474	glycine-rich RNA-binding protein	Gossypium hirsutum	0.658762		1.26103		0.984252
Garb_19672	237	47802	18.5	4	4	88.64	3e-141	gi|297737508	Cell division protein FtsZ homolog 1, chloroplastic	Arabidopsis thaliana	1.38122	*	1.17371		1.23001
cotton_GLEAN_10011001	218	62748	11.5	4	2	55.35	7e-153	gi|1169451	Probable glucan endo-1,3-beta-glucosidase A6	Arabidopsis thaliana	2.1692		1.43885		1.73913
Garb_04184	185	62519	9.5	3	1	74.42	8e-176	gi|255587687	Glucan endo-1,3-beta-glucosidase precursor, putative	Ricinus communis	---		---		---
Garb_31396	184	64201	13.7	4	2	73	2e-76	gi|119006	Glucan endo-1,3-beta-glucosidase, basic isoform	Phaseolus vulgaris	0.585823		1.10375		0.956938
Garb_04497	183	16265	17.6	2	1	94.62	2e-59	gi|302325341	profilin	Gossypium hirsutum	---		---		---
Garb_06395	172	16146	17.3	2	1	86.47	4e-56	gi|257219548	profilin-like protein	Jatropha curcas	---		---		---
cotton_GLEAN_10006437	163	33750	11.8	2	2	100	1e-149	gi|1729760	chitinase	Gossypium hirsutum	0.751315	*	1.18483		1.07875
cotton_GLEAN_10037095	155	69841	7.5	4	3	66.23	4e-23	gi|255546283	Glucan endo-1,3-beta-glucosidase precursor, putative	Ricinus communis]	2.91545	*	2.03666	*	2.234	*
Garb_03829	151	31050	24.5	3	1	61.86	1e-83	gi|224126451	Expansin-like B1	Arabidopsis thaliana	0.134716		1.47275	*	0.761615	*
Garb_21578	145	46349	24.1	6	3	99.72	0	gi|166865124	cinnamyl alcohol dehydrogenase	Gossypium hirsutum	0.635324		1.08108		0.801925
Garb_10824	142	33179	17.4	4	2	81.74	1e-102	gi|224105087	hypothetical protein POPTRDRAFT_832983	Populus trichocarpa	0.45208		1.00604		0.801282
Garb_37525	142	60696	6.8	2	2	75.79	0	gi|38257732	Glucan endo-1,3-beta-glucosidase 6	Arabidopsis thaliana	2.6178	*	1.02987		1.61812
Garb_09248	133	16554	31.3	2	2	86.26	3e-56	gi|284810529	profilin	Arachis hypogaea	1.59744		1.03842		1.05597
cotton_GLEAN_10002246	130	63562	13.5	6	4	88.54	5e-38	gi|219939385	xylose isomerase	Arabidopsis thaliana	1.68634	*	0.675219	*	1.05152
Garb_06013	125	60886	15	4	4	77.06	0	gi|115502153	Glucan endo-1,3-beta-glucosidase 8	Arabidopsis thaliana	1.61031		0.925926		1.17647
cotton_GLEAN_10018164	120	46305	19.6	5	2	99.44	8e-162	gi|194454813	cinnamyl alcohol dehydrogenase	Gossypium hirsutum	0.863558		0.951475		0.912409
Garb_28951	97	31808	11.2	2	2	75.93	3e-108	gi|255580799	Major pollen allergen Ory s 1 precursor, putative	Ricinus communis	0.354862		0.396825		0.409333
cotton_GLEAN_10024877	95	58663	9.2	3	2	74.65	0	gi|223635599	Probable polygalacturonase	Vitis vinifera	1.13379		1.80832	*	1.46413
Garb_12442	92	139167	6.4	5	1	84.91	1e-127	gi|357509713	Villin-2	Medicago truncatula	---		---		---
Garb_32096	89	80180	6.2	2	2	50.27	1e-96	gi|548488	Polygalacturonase	Actinidia deliciosa	1.28205		1.08108		1.18064
Garb_10317	87	63466	2.8	1	1	74.19	5e-07	gi|75102404	Tyrosine-rich hydroxyproline-rich glycoprotein	Petroselinum crispum	1.07066		1.53139	*	1.24069
Garb_25809	82	62892	10.6	3	3	100	0	gi|156938963	adenylyl cyclase-associated protein	Gossypium arboreum	0.770416		0.768049		0.82713
Garb_01016	76	21273	25.4	3	3	94.87	1e-14	gi|195626496	glycine-rich RNA-binding protein 2	Zea mays	1.3986		0.762195		1.02459
cotton_GLEAN_10037636	69	37553	16.4	3	3	81	8e-88	gi|75160436	GLABRA2 expression modulator	Arabidopsis thaliana	0.859107		0.783699		0.826446
Garb_02630	67	60465	5.7	3	2	71.59	0	gi|259016223	Glucan endo-1,3-beta-glucosidase 7	Arabidopsis thaliana	2.662	*	3.456		3.108	*
Garb_22364	64	34907	5.8	1	1	84.06	2e-127	gi|255548237	class I chitinase, putative	Ricinus communis	1.35501	*	0.956938		1.12233
cotton_GLEAN_10004578	63	37266	4.1	1	1	87.59	2e-70	gi|50952798	xyloglucan endotransglycosylase	Prunus armeniaca	0.529101		1.8315		1.0989	*
Garb_03746	60	126072	1.2	1	1	90.75	5e-152	gi|255554861	Glucan endo-1,3-beta-glucosidase precursor, putative	Ricinus communis]	---		---		---
Garb_30266	59	37039	5.6	1	1	100	2e-172	gi|155966601	xyloglucan endotransglycosylase	Gossypium hirsutum	---		---		---
Garb_25632	55	40269	2.8	1	1	100	2e-72	gi|258489588	proline-rich protein 3	Gossypium hirsutum	0.40404	*	0.85034		0.59453
Garb_21148	54	29948	8.4	1	1	86.28	6e-117	gi|255575760	Major pollen allergen Ory s 1 precursor, putative	Ricinus communis	0.846024		0.983284		0.968992
Garb_38419	51	60881	2.4	1	1	76.35	0	gi|38257734	Glucan endo-1,3-beta-glucosidase 4	Arabidopsis thaliana	1.53139		1.14286		1.2987
Garb_21598	48	93262	4.4	2	2	72.35	0	gi|75250279	Probable beta-D-xylosidase 2	Arabidopsis thaliana	1.35318		1.1534		1.26743
Garb_04729	46	43970	3.3	1	1	98.2	0	gi|315419013	GLU	Gossypium hirsutum]	0.389864		0.267881		0.318979
cotton_GLEAN_10001371	45	45856	13.4	3	3	98.67	6e-104	gi|229368452	cinnamyl alcohol dehydrogenase 7	Gossypium hirsutum	0.712758		1.45985		1.04058
Garb_19698	41	24692	10.5	2	2	62.28	1e-46	gi|297826057	integral membrane family protein	Arabidopsis lyrata subsp. lyrata	1.85529		1.11607		1.53846
Garb_18854	40	17172	5.2	1	1	100	3e-30	gi|224552010	hybrid proline-rich protein	Gossypium hirsutum	3.427	*	4.043	*	3.507	*
Garb_04270	39	57552	2.1	1	1	79.37	0	gi|255579041	Glucan endo-1,3-beta-glucosidase precursor, putative	Ricinus communis]	---		---		---
cotton_GLEAN_10031339	39	61996	2.1	1	1	75.06	0	gi|255550261	Glucan endo-1,3-beta-glucosidase precursor, putative	Ricinus communis]	---		---		---
Garb_09710	38	33184	5.4	1	1	79.54	2e-105	gi|374719241	chitinase 7	Populus x canadensis	---		---		---
Garb_31603	38	33348	6.2	1	1	67.21	2e-85	gi|20138423	Putative expansin-B2	Arabidopsis thaliana	---		---		---
Garb_06381	37	61952	2.3	1	1	86.7	9e-108	gi|1351408	Vacuolar-processing enzyme	Citrus sinensis	---		---		---
Garb_17151	36	174151	0.9	1	1	83.83	0	gi|255539278	Glucan endo-1,3-beta-glucosidase precursor, putative	Ricinus communis]	---		---		---
Garb_17117	35	130964	2.5	1	1	98.33	1e-28	gi|288561907	Cell division cycle 5-like protein	Arabidopsis thaliana	---		---		---
Garb_42132	34	46864	3.6	1	1	85.36	1e-149	gi|57229665	sinapyl alcohol dehydrogenase-like protein	Populus tremula x Populus tremuloides	---		---		---
Garb_22900	34	57100	2.3	1	1	86.8	0	gi|255573702	Glucan endo-1,3-beta-glucosidase precursor, putative	Ricinus communis]	2.896	*	1.386		1.93424	*
Garb_17194	33	32208	6.6	1	1	84.28	2e-115	gi|357511615	Alpha-expansin	Medicago truncatula	---		---		---
Garb_16541	32	26651	8.8	1	1	88.02	2e-82	gi|58333698	expansin	Musa acuminata	---		---		---
Garb_01342	30	104031	1.3	1	1	83.23	6e-112	gi|225443274	cell wall integrity protein scw1-like	Vitis vinifera	---		---		---
cotton_GLEAN_10029803	29	38292	4.1	1	1	98.3	3e-162	gi|361052049	xyloglucan endotransglycosylase	Gossypium hirsutum	---		---		---
Garb_33661	28	55071	2.3	1	1	57.78	5e-146	gi|255580057	Glucan endo-1,3-beta-glucosidase precursor, putative	Ricinus communis]	---		---		---
					Miscellaneous (46)
Garb_38039	1126	26626	53.4	8	7	90.59	8e-96	gi|255555109	Flavoprotein wrbA, putative	Ricinus communis	0.626566	*	1.23762	*	1.03413
Garb_20949	565	69173	31.1	13	5	83.91	3e-37	gi|197293844	disulfide-isomerase precursor, partial	Prunus dulcis	0.461894	*	1.47275	*	1.04167
cotton_GLEAN_10007062	479	29341	24.5	4	4	55.81	9e-57	gi|255584681	Auxin-induced in root cultures protein 12 precursor, putative	Ricinus communis	1.221		0.717875	*	0.93985
Garb_26040	232	19461	13	1	1	100	4e-61	gi|319433441	copper binding protein 3	Gossypium hirsutum	0.75188		0.458716	*	0.551268	*
cotton_GLEAN_10018846	185	36212	15.2	3	1	83.62	7e-143	gi|150421627	Pirin-like protein At2g43120	Arabidopsis thaliana	0.474383		0.75188		0.630915
cotton_GLEAN_10026325	185	60473	19.2	6	6	74.43	0	gi|225461667	epidermis-specific secreted glycoprotein EP1-like	Vitis vinifera	0.781861		1.3089	*	0.982318
Garb_01925	181	37158	9.7	2	1	84.75	5e-55	gi|167966409	CEL I endonuclease-like protein	Anethum graveolens	1.77305	*	0.548246		0.803213
Garb_18911	173	29801	18.9	3	3	36.41	4e-21	gi|357493387	S-RNase	Medicago truncatula	0.81103	*	1.51515	*	1.17925	*
Garb_26690	152	56467	10.7	4	1	68.99	3e-170	gi|255569357	Epidermis-specific secreted glycoprotein EP1 precursor, putative	Ricinus communis	0.698812		1.24224		1.0101
cotton_GLEAN_10023724	126	65462	11.2	4	1	81.51	0	gi|255581402	catalytic, putative	Ricinus communis	1.59744		0.724638		1.05932
cotton_GLEAN_10009261	121	62681	8.7	3	3	81.25	3e-40	gi|319433445	copper binding protein 5	Gossypium hirsutum	1.19904		0.65703	*	0.816993
cotton_GLEAN_10016524	118	33337	11.3	2	2	82.52	7e-87	gi|255579337	short chain alcohol dehydrogenase, putative	Ricinus communis	1.22249		1.14286		1.25313	*
cotton_GLEAN_10035899	118	40559	18.5	4	4	73.03	2e-129	gi|84468444	putative DNA-damage-repair/toleration protein DRT102	Trifolium pratense	1.19617		1.40647	*	1.20482
Garb_09336	118	31462	16.5	5	5	95.45	2e-42	gi|317454960	putative protein yrdA-like protein	Helleborus orientalis	0.792393		1.48368	*	1.27877
Garb_11829	117	76015	9.6	4	4	97.5	4e-61	gi|39931384	Dihydroxy-acid dehydratase	Rhodopirellula baltica	1.45773		1.22399		1.31406
Garb_27411	107	70537	7.7	2	2	79.41	0	gi|158564046	4-coumarate--CoA ligase-like 5	Arabidopsis thaliana	0.512033		0.690608		0.616523
Garb_37450	102	56149	10.4	3	3	86.05	0	gi|75322635	Protein disulfide isomerase-like 2-3	Oryza sativa subsp. japonica	1.9802	*	0.966184		1.36054
cotton_GLEAN_10035795	94	18818	26.4	3	3	82.35	1e-08	gi|68565931	Nudix hydrolase 1	Arabidopsis thaliana	1.00908		2.15054	*	1.03306
Garb_29097	91	26748	18.9	3	3	74.85	4e-65	gi|146454570	SOUL-like protein	Sonneratia caseolaris	0.707214		0.702741	*	0.786164
Garb_15309	91	162937	2.9	2	2	90.91	5e-28	gi|60390647	Regulator of nonsense transcripts 2	Homo sapiens	0.861326		1.20482		0.937207
Garb_15686	86	51761	10.1	3	1	99.74	0	gi|211906520	UDP-D-apiose/UPD-D-xylose synthetase	Gossypium hirsutum	---		---		---
Garb_23678	82	37878	13	3	3	95.48	1e-80	gi|289064704	Sec13-like protein	Eperua falcata	0.602047		0.930233		0.788644
Garb_19492	81	77690	8	3	3	85.61	2e-140	gi|146286063	Carotenoid 9,10(9',10')-cleavage dioxygenase 1	Arabidopsis thaliana	0.83612		0.88968		0.829187
Garb_35439	76	46600	3.8	1	1	88.74	0	gi|229830633	L-idonate 5-dehydrogenase	Vitis vinifera	0.464037		0.809061		0.600601	*
Garb_38637	74	82976	6.1	3	2	86.89	2e-21	gi|1171978	Polyadenylate-binding protein 2	Arabidopsis thaliana	0.816327		1.44928		1.16686
Garb_14708	73	66240	5.3	2	2	89.07	0	gi|27735197	Riboflavin biosynthesis protein ribBA, chloroplastic	Arabidopsis thaliana	1.16959		0.90009	*	1.01626
Garb_01647	63	11864	14.9	1	1	91.57	5e-40	gi|99646724	B12D-like protein	Beta vulgaris	1.19617		0.935454		0.997009
Garb_14293	62	60283	2.3	1	1	93.6	0	gi|20141399	I, chloroplastic	Arabidopsis thaliana	0.4662		0.751315		0.608643
Garb_06364	60	116529	3.3	2	2	83.33	3e-40	gi|205371863	Puromycin-sensitive aminopeptidase-like protein	Homo sapiens	0.664452		0.783699	*	0.712251
cotton_GLEAN_10003446	56	43511	7.8	2	2	73.59	7e-150	gi|255569153	catalytic, putative	Ricinus communis	0.323206	*	1.42653		0.931099
Garb_07586	55	67558	4.3	1	1	97.37	9e-16	gi|154939511	retinoblastoma-associated protein	Phaseolus vulgaris	0.761035		1.0582		0.900901
Garb_07161	52	21753	13.9	2	2	99.3	3e-80	gi|253684301	mago nashi	Lycoris radiata	1.03413		0.96432		0.998004
Garb_10479	46	52321	7.2	1	1	75.24	2e-165	gi|255542602	amidase, putative	Ricinus communis	---		---		---
Garb_07876	43	146892	1	1	1	93.79	8e-95	gi|302393805	Topless-related protein 1	Arabidopsis thaliana	---		---		---
Garb_20601	43	37487	4.4	1	1	82.43	7e-134	gi|255563882	adhesion regulating molecule, putative	Ricinus communis	---		---		---
cotton_GLEAN_10013485	40	72239	4.7	2	2	92.64	6e-177	gi|29427920	BRASSINOSTEROID INSENSITIVE 1-associated receptor kinase 1	Arabidopsis thaliana	1.96078		1.20919		1.53139
Garb_21268	40	26477	7.2	1	1	86.7	3e-91	gi|255569313	Flavoprotein wrbA, putative	Ricinus communis	---		---		---
cotton_GLEAN_10027637	36	80622	3.9	2	2	77.18	0	gi|225457618	dolichyl-diphosphooligosaccharide--protein glycosyltransferase subunit 1	Vitis vinifera	0.679348	*	0.949668		0.81103
Garb_08087	35	59379	2.3	1	1	93.82	0	gi|119784	3-oxoacyl-[acyl-carrier-protein] synthase I, chloroplastic	Arabidopsis thaliana	---		---		---
Garb_33024	33	106342	3.6	2	2	81.31	3e-41	gi|359492201	protein IQ-DOMAIN 32-like	Vitis vinifera	1.43266	*	0.966184		1.15741
Garb_42934	32	37525	2.6	1	1	85.25	6e-133	gi|20532134	2-dehydro-3-deoxyphosphooctonate aldolase	Arabidopsis thaliana	---		---		---
Garb_14545	32	59615	6.4	2	2	83.87	2e-41	gi|47026908	selenium-binding protein	Hyacinthus orientalis	0.456413		0.738552		0.584795
Garb_38572	30	45793	3.5	1	1	81	5e-140	gi|4731376	isoflavone reductase homolog Bet v 6.0101	Betula pendula	---		---		---
Garb_13587	30	34347	5.9	1	1	76.8	3e-86	gi|255554739	short-chain dehydrogenase, putative	Ricinus communis	---		---		---
Garb_12816	29	77796	4	2	1	84.66	0	gi|289541359	ectoapyrase 1	Gossypium hirsutum	---		---		---
Garb_13699	20	16433	4.7	1	1	95.28	6e-66	gi|319433447	copper binding protein 6	Gossypium hirsutum	---		---		---
					Unknown (176)
Garb_13496	912	48082	24.8	6	3	82.38	3e-90	gi|225438019	PREDICTED: uncharacterized protein LOC100263471	Vitis vinifera	1.31062		1.05152		1.14155	*
Garb_05122	560	49790	19.5	6	6	78.46	5e-22	gi|297736988	unnamed protein product	Vitis vinifera	1.85285	*	1.66213	*	1.88936	*
Garb_43009	495	67333	25.4	8	8	77.78	6e-37	gi|297744792	unnamed protein product	Vitis vinifera	1.0846		0.693481	*	0.882613
cotton_GLEAN_10014377	465	48973	22.4	8	6	71.88	2e-06	gi|226499470	uncharacterized protein LOC100277433	Zea mays	1.25628	*	1.06838		1.18203	*
cotton_GLEAN_10030148	423	64112	9.1	4	1	72.11	0	gi|296082871	unnamed protein product	Vitis vinifera	1.20337		0.782473	*	1.01112
Garb_29121	371	26846	21.7	4	4	87.23	6e-68	gi|149392473	cbs domain protein	Oryza sativa Indica Group	0.919118		1.10742		1.0627
cotton_GLEAN_10029849	114	50016	8	2	2	84.34	5e-80	gi|147767808	hypothetical protein VITISV_032830	Vitis vinifera	1.99		1.26904		1.596	*
cotton_GLEAN_10002178	362	223312	9.3	12	7	63.32	2e-54	gi|296085854	unnamed protein product	Vitis vinifera	1.82815		0.913242		1.23457
Garb_26721	340	104601	5.5	4	1	72.22	0	gi|296082870	unnamed protein product	Vitis vinifera	2.27273		1.13379		1.57729
Garb_16580	324	184622	9.8	10	5	63.33	2e-12	gi|26449580	unknown protein	Arabidopsis thaliana	1.38122	*	1.07181		1.14155
cotton_GLEAN_10039328	321	45990	23	6	2	79.38	2e-81	gi|302142800	unnamed protein product	Vitis vinifera	1.25945		1.35501		1.26263
Garb_02804	315	20960	23	2	2	76.77	7e-66	gi|255553155	conserved hypothetical protein	Ricinus communis	1.74216	*	0.808407		1.13636
Garb_43388	285	82725	18.1	7	7	64.07	1e-42	gi|147866236	hypothetical protein VITISV_033523	Vitis vinifera	1.18343	*	1.21065	*	1.14548	*
Garb_42123	285	74710	14.8	6	2	82.4	9e-59	gi|147854282	hypothetical protein VITISV_005773	Vitis vinifera	---		0.962464		0.8	*
Garb_22500	242	92100	7.3	4	1	74.58	0	gi|224059900	predicted protein	Populus trichocarpa	---		---		---
Garb_27354	225	45344	18.1	5	5	82.82	2e-149	gi|224092049	predicted protein	Populus trichocarpa	0.528541	*	0.924214		0.757002	*
cotton_GLEAN_10021365	205	24239	33	4	4	81.18	1e-34	gi|21553864	unknown	Arabidopsis thaliana	1.05374		0.8285	*	0.906618
Garb_28296	200	55898	17.8	5	5	85.71	4e-64	gi|223943077	unknown	Zea mays	0.384763	*	0.848		0.643915	*
Garb_28018	198	36609	19.4	3	3	80	3e-06	gi|147782603	hypothetical protein VITISV_010455	Vitis vinifera	0.59952	*	0.343879	*	0.447	*
Garb_27713	192	58793	14.5	5	4	97.92	2e-19	gi|224123472	predicted protein	Populus trichocarpa	1.33156		1.27389	*	1.18343
Garb_27386	185	22278	30.1	5	4	82.42	7e-74	gi|351721446	uncharacterized protein LOC100499951	Glycine max	0.86881		1.17233		1.17925
Garb_09964	182	48104	23	7	7	81.82	4e-53	gi|388511004	unknown	Medicago truncatula	0.684932	*	1.13636		0.838926	*
Garb_16108	176	30451	16.7	3	1	63.73	2e-20	gi|224113533	predicted protein	Populus trichocarpa	0.986193		1.02354		0.96432
Garb_20352	174	65079	5.3	2	2	69.57	7e-72	gi|356515250	uncharacterized protein LOC100782994	Glycine max	1.13766		1.02564		1.05374
Garb_11514	172	51182	9.8	3	3	65.73	1e-122	gi|224055571	predicted protein	Populus trichocarpa	0.679348		1.20627		1.00604
cotton_GLEAN_10024395	169	57926	19.3	4	4	85.43	5e-73	gi|297743302	unnamed protein product	Vitis vinifera	0.83612	*	0.98912		0.851789
cotton_GLEAN_10016791	163	53096	13.1	3	3	80.05	9e-178	gi|224122096	predicted protein	Populus trichocarpa	0.572738		0.96432		0.754717
cotton_GLEAN_10010353	161	53652	12.7	5	5	66.93	9e-144	gi|225458697	uncharacterized protein	Vitis vinifera	1.91	*	1.49925	*	1.66	*
Garb_00761	155	58701	6.9	2	2	77.03	2e-156	gi|224126221	predicted protein	Populus trichocarpa	0.666223		1.20773	*	0.792393
Garb_09472	151	61137	8.5	3	3	79.82	5e-98	gi|356554258	PREDICTED: uncharacterized protein LOC100783742	Glycine max	1.29199		1.10132		1.23609
Garb_23162	149	42586	23.6	4	3	74.44	6e-31	gi|357464731	hypothetical protein MTR_3g096580	Medicago truncatula	1.07181		1.24224		1.03842
Garb_23875	147	34082	17.6	3	3	63.42	3e-85	gi|225449374	uncharacterized protein At2g39795, mitochondrial	Vitis vinifera	0.852515		1.09051		1.02041
cotton_GLEAN_10024664	141	100964	6.2	4	2	93.62	3e-20	gi|224116450	predicted protein	Populus trichocarpa	1.62602		1.01523		1.29199
Garb_17623	140	70067	8.6	3	3	79.25	5e-54	gi|118481708	unknown	Populus trichocarpa	1.34228		1.5625	*	1.44509
Garb_19921	135	38774	36	7	7	86.6	1e-98	gi|302141839	unnamed protein product	Vitis vinifera	1.00301		1.49254	*	1.18765	*
Garb_15991	135	31611	12.4	2	2	87.68	1e-60	gi|147862580	hypothetical protein VITISV_032108	Vitis vinifera	0.837521		1.1325		1.05263
cotton_GLEAN_10023660	125	38486	18.1	5	5	59.88	6e-49	gi|225432286	uncharacterized protein LOC100242678	Ricinus communis	0.972763		0.976562		0.981354
Garb_37536	123	175433	2	2	2	90.57	3e-80	gi|359496647	uncharacterized protein LOC100263199, partial	Vitis vinifera	2.44499		2.80112	*	2.57732
Garb_02411	122	67046	5.2	2	2	90.24	4e-13	gi|388500172	unknown	Lotus japonicus	1.33511		0.925069		1.04167
Garb_14705	122	38349	8.4	2	2	82.5	6e-13	gi|388513337	unknown	Lotus japonicus	0.665336		1.21951	*	0.878735
cotton_GLEAN_10020476	119	32525	10.3	1	1	76.87	4e-33	gi|224142709	predicted protein	Populus trichocarpa	2.20751		1.4771		1.80832
cotton_GLEAN_10022946	117	194157	5.5	5	3	66.28	3e-133	gi|224137412	predicted protein	Populus trichocarpa	1.14416		0.636132		0.838926	*
Garb_09350	117	42809	14.7	3	3	93.58	3e-117	gi|217073300	unknown	Medicago truncatula	0.424268		0.829187		0.667111	*
Garb_27208	111	44967	2.7	1	1	100	1e-08	gi|383932360	hypothetical protein	Gossypium hirsutum	1.1274		0.859845		0.940734
Garb_04057	110	49251	21	5	5	91.4	7e-43	gi|396095760	hypothetical protein, partial	Ceiba aesculifolia	0.790514		1.82149	*	1.32802	*
Garb_27676	109	55940	9.5	3	3	92.92	0	gi|297734363	unnamed protein product	Vitis vinifera	1.7452		0.85034		1.22399
Garb_36150	106	72171	4.8	2	2	71.68	0	gi|224142519	predicted protein	Populus trichocarpa	0.75358		0.75815		0.755287
cotton_GLEAN_10028715	105	223224	2	2	2	62.46	9e-104	gi|359486545	uncharacterized protein LOC100266828	Vitis vinifera	0.909091		0.679348		0.777001	*
cotton_GLEAN_10018015	104	111171	6.3	5	3	74.94	0	gi|224075776	predicted protein	Populus trichocarpa	1.15075		0.8		0.94518
Garb_21456	103	56360	2.7	1	1	62.83	7e-143	gi|297736090	unnamed protein product	Vitis vinifera	1.16686		1.20919		1.25471
cotton_GLEAN_10025656	99	30867	16.4	3	3	76.47	8e-80	gi|225444283	uncharacterized protein LOC100265893	Vitis vinifera	0.928505		0.763359		0.825764
Garb_13390	99	28644	15.1	3	3	88.46	2e-50	gi|296083113	unnamed protein product	Vitis vinifera	0.746269		0.931966		0.832639
cotton_GLEAN_10015984	96	42828	4.5	1	1	86.96	7e-127	gi|22096383	Uncharacterized protein At2g37660, chloroplastic	Arabidopsis thaliana	1.46628		0.967118		1.17233
Garb_06285	95	48518	14.5	4	2	71.96	9e-59	gi|225469850	uncharacterized protein LOC100265608	Vitis vinifera	0.566893		1.03413		1.03734
cotton_GLEAN_10026526	94	56213	5.4	2	2	70.77	6e-22	gi|326533052	predicted protein	Hordeum vulgare subsp. vulgare	1.74216		0.865052		1.22399
cotton_GLEAN_10019875	93	48976	7.4	2	2	83.82	2e-100	gi|388519995	unknown	Lotus japonicus	2.00401		0.791766		1.25471
Garb_04125	92	42340	13.2	3	2	86.67	1e-07	gi|388499178	unknown	Lotus japonicus	0.558971	*	0.804		0.644745	*
Garb_33309	92	179544	4.4	4	4	86.11	4e-32	gi|224135597	predicted protein	Populus trichocarpa	1.01937		1.0395		1.11732
cotton_GLEAN_10000382	91	27144	10.6	1	1	78.57	1e-34	gi|297802894	hypothetical protein ARALYDRAFT_913334	Arabidopsis lyrata subsp. lyrata	0.788022		0.772201		0.773994
Garb_23232	91	17594	15.4	1	1	50.85	5e-07	gi|297816874	hypothetical protein ARALYDRAFT_485995	Arabidopsis lyrata subsp. lyrata	17.2414	*	0.866551		0.905797
Garb_04180	91	49356	6.1	2	2	72.56	1e-84	gi|297741780	unnamed protein product	Vitis vinifera	1.43472		0.683527		0.968054
Garb_25061	88	56583	11.6	3	3	70.51	3e-24	gi|212723160	uncharacterized protein LOC100193813	Zea mays	0.926784		0.925069		0.848896
cotton_GLEAN_10028795	88	52693	7.4	2	2	80	1e-32	gi|255580721	conserved hypothetical protein	Ricinus communis	1.91205		1.14025		1.45349
Garb_02952	88	33315	13.9	3	1	81.35	7e-75	gi|351727687	uncharacterized protein LOC100305884 precursor	Glycine max	---		---		---
Garb_23686	87	30534	13.4	3	3	78.7	4e-102	gi|298204452	unnamed protein product	Vitis vinifera	0.898473		1.09529		0.96432
cotton_GLEAN_10019750	87	96287	11.7	4	2	90	2e-07	gi|359492431	PREDICTED: uncharacterized protein LOC100248897	Vitis vinifera	---		0.73692		0.540249
cotton_GLEAN_10013083	87	89091	4.4	3	1	77.89	5e-58	gi|388494306	unknown	Lotus japonicus	0.675676		1.02354		0.861326
Garb_17674	87	73939	16	4	4	55.95	1e-19	gi|255552157	protein binding protein, putative	Ricinus communis	0.877963		1.18203		1.11607
Garb_28494	86	37404	9.3	2	2	70.07	1e-105	gi|224069094	predicted protein	Populus trichocarpa	1.98807		0.894454		1.31579
cotton_GLEAN_10032385	84	75969	7.9	4	1	82.76	2e-06	gi|308081512	uncharacterized protein LOC100501712	Zea mays	---		---		---
Garb_11692	83	58862	10.6	4	4	80.85	7e-34	gi|225452376	uncharacterized protein LOC100264681	Vitis vinifera	1.64745		1.07875		1.31926
cotton_GLEAN_10010359	83	19046	17.2	2	2	72.53	2e-32	gi|255538152	conserved hypothetical protein	Ricinus communis	1.25945		1.18765		1.08108
Garb_34877	80	119952	5.3	3	2	71.22	0	gi|225464485	uncharacterized protein LOC100264485	Vitis vinifera	0.921659		0.980392		0.953289
Garb_16517	80	79579	7.9	4	3	82.81	5e-27	gi|223942497	unknown	Zea mays	2.07469	*	0.978474		1.17786
cotton_GLEAN_10003497	79	64417	7.5	3	2	79.75	2e-70	gi|388499932	unknown	Lotus japonicus	1.43885		0.997009		1.18343
Garb_34173	78	149351	2.8	2	2	87.5	0	gi|224118584	predicted protein	Populus trichocarpa	1.0582		0.809061		0.913242
Garb_19646	77	38811	8.4	2	2	79.93	1e-129	gi|224063217	predicted protein	Populus trichocarpa	0.960615		1.55521		1.2837
Garb_08547	76	41212	10	2	2	81.25	1e-79	gi|302141981	unnamed protein product	Vitis vinifera	1.3587		0.919963		1.09769
Garb_10675	75	61926	7.1	2	2	45.86	3e-35	gi|18415554	dentin sialophosphoprotein-related protein	Arabidopsis thaliana	0.933707		0.976562		1.10132
Garb_12638	75	53776	7.1	2	2	84.62	1e-141	gi|255640568	unknown	Glycine max	0.432713	*	0.809061		0.65445
Garb_00189	74	61183	5.2	2	2	77.27	6e-23	gi|298205067	unnamed protein product	Vitis vinifera	1.07875		0.699301		0.81367	*
Garb_19999	72	17070	14.2	2	1	58.7	5e-21	gi|356567730	uncharacterized protein At5g48480-like	Glycine max	2.42131		0.786164		1.38313
Garb_23458	72	155303	3.6	4	3	86.64	0	gi|255572430	conserved hypothetical protein	Ricinus communis	1.64745		1.08578		1.31579
cotton_GLEAN_10011184	72	34485	10.4	2	2	73.91	2e-28	gi|62319531	hypothetical protein	Arabidopsis thaliana	1.52207		0.707214		1.02987
Garb_00652	72	33107	9	2	2	78.11	7e-75	gi|296090456	unnamed protein product	Vitis vinifera	0.849618		1.24224	*	1.02669
cotton_GLEAN_10031769	70	28735	6.5	1	1	42.86	5e-06	gi|388501724	unknown	Lotus japonicus	1.44718		1.07066		1.22549
Garb_25784	70	43890	6.8	2	1	88.6	4e-52	gi|224121546	predicted protein	Populus trichocarpa	0.87108		1.14155		1.002
cotton_GLEAN_10016109	70	58284	6.5	3	3	75	4e-10	gi|357504523	hypothetical protein MTR_7g045290	Medicago truncatula	0.512821	*	1.05597		0.739098
cotton_GLEAN_10037828	69	128873	4.6	3	3	74.25	0	gi|224067264	predicted protein	Populus trichocarpa	1.04712		1.18906		1.11235
Garb_05515	67	38254	9	2	2	78.71	1e-143	gi|224131878	predicted protein	Populus trichocarpa	0.669792		1.17096		0.856164
cotton_GLEAN_10028281	67	35424	7.3	2	2	81.4	8e-80	gi|296090455	unnamed protein product	Vitis vinifera	0.903342		1.41443		1.18906
Garb_01589	67	52924	3.4	1	1	74.29	4e-23	gi|374921973	hypothetical protein, partial	Lolium perenne	0.891266		0.974659		0.93633
Garb_12625	66	57450	10.2	4	3	91.62	2e-89	gi|388497122	unknown	Lotus japonicus	1.1919		1.04603		1.04603
Garb_13400	66	38898	7.8	2	2	57.47	9e-23	gi|224072873	predicted protein	Populus trichocarpa	0.771605		0.865052		0.808407
Garb_01672	64	47650	7.9	2	2	85.51	1e-28	gi|62318857	hypothetical protein	Arabidopsis thaliana	0.983284		1.24844		1.14811
Garb_24944	64	23631	7.8	1	1	45.83	9e-28	gi|297737828	unnamed protein product	Vitis vinifera	1.39082		1.82149		1.57233
Garb_22755	64	84151	8.7	4	4	66.67	2e-06	gi|294461953	unknown	Picea sitchensis	0.972763		0.856164		0.909918
cotton_GLEAN_10014562	64	68272	11.8	4	4	79.79	2e-32	gi|296087623	unnamed protein product	Vitis vinifera	1.11111		1.03306		1.08225
Garb_28927	64	20893	11	1	1	32.37	2e-11	gi|326497085	predicted protein	Hordeum vulgare subsp. vulgare	0.226244		0.746269		0.49554
cotton_GLEAN_10005853	63	109046	4.8	3	3	77.19	5e-22	gi|224056457	predicted protein	Populus trichocarpa	0.863558	*	1.29366		1.08932
Garb_02528	63	23710	10.9	2	2	81.43	2e-62	gi|224089370	predicted protein	Populus trichocarpa	3.78788		1.18343		2.23714
cotton_GLEAN_10039745	62	18505	10	1	1	68.42	5e-24	gi|255539495	conserved hypothetical protein	Ricinus communis	1.70068		1.05932		1.321
Garb_11424	62	33040	8.7	2	2	94.74	5e-14	gi|297831032	predicted protein	Arabidopsis lyrata subsp. lyrata	0.185529		0.969932		0.634921
Garb_16534	62	74051	9.2	4	3	83.81	4e-160	gi|302142703	unnamed protein product	Vitis vinifera	0.834725		0.716846	*	0.788644
Garb_08014	62	27720	9.5	2	2	77.33	2e-56	gi|118483007	unknown	Populus trichocarpa	1.5748		0.893655		1.15075
Garb_15379	62	38842	7.4	2	2	80.32	1e-137	gi|224124078	predicted protein	Populus trichocarpa	0.884956	*	1.20337		1.08108
Garb_30812	62	26895	7.3	1	1	75.96	5e-82	gi|357443405	hypothetical protein MTR_1g095890	Medicago truncatula	0.818331	*	0.783085		0.798085	*
cotton_GLEAN_10033425	61	55263	2.6	1	1	78.4	0	gi|147797703	hypothetical protein VITISV_020314	Vitis vinifera	---		---		---
cotton_GLEAN_10009019	61	13510	23.8	2	2	93.07	3e-48	gi|224137260	predicted protein	Populus trichocarpa	2.052		2.414	*	2.30947	*
Garb_13221	61	27688	9.9	2	2	84.85	1e-44	gi|225437334	uncharacterized protein OsI_027940-like	Vitis vinifera	0.838223		0.755858	*	0.805153	*
Garb_13263	60	89905	6.3	3	3	82.52	4e-68	gi|296088150	unnamed protein product	Vitis vinifera	1.11235		1.01523		1.05374
Garb_24671	60	41147	4.7	1	1	83.96	4e-132	gi|388495016	unknown	Lotus japonicus	1.34048		1.05263		1.07296
Garb_20787	60	46691	8.3	3	2	53.69	6e-34	gi|298204523	unnamed protein product	Vitis vinifera	1.52905		1.32979		1.32802
Garb_23328	60	54747	6.7	2	2	73.61	3e-29	gi|218192497	hypothetical protein OsI_10872	Oryza sativa Indica Group	2.01207		1.17647		1.53139
Garb_00663	60	84775	1.7	1	1	75.68	6e-92	gi|293334187	uncharacterized protein LOC100381485	Zea mays	0.934579		0.901713	*	0.91659
Garb_24931	59	157883	1.5	1	1	93.79	4e-82	gi|255558854	hypothetical protein RCOM_0731250	Ricinus communis	1.10619		0.816327		0.966184
Garb_40679	59	165055	2.3	2	2	63.85	7e-137	gi|296087303	unnamed protein product	Vitis vinifera	1.94932	*	0.840336		1.34771
cotton_GLEAN_10013957	59	47370	9.6	2	2	51.02	1e-21	gi|224093242	predicted protein	Populus trichocarpa	0.837521		1.08814		0.88968	*
cotton_GLEAN_10012038	58	65614	8.4	3	3	81.09	3e-86	gi|224103833	predicted protein	Populus trichocarpa	1.8315	*	1.10742		1.41844	*
Garb_38350	55	18063	10.2	1	1	-	-	gi|224111062	predicted protein	Populus trichocarp	1.01833		0.94518		0.980392
Garb_13283	54	107100	4.3	2	2	88.37	9e-15	gi|223945635	unknown	Zea mays	0.557103		0.788644		0.683995
Garb_01790	54	21862	15.4	1	1	58.82	3e-31	gi|356557759	uncharacterized protein LOC100792242	Glycine max	0.737463	*	1.15875		0.954198
cotton_GLEAN_10027063	54	21496	5.6	1	1	73.48	4e-56	gi|359496362	uncharacterized protein LOC100854560	Vitis vinifera	0.965251		0.484027		0.66357	*
Garb_16929	53	74661	5.9	2	2	77.42	6e-06	gi|168011578	predicted protein	Populus trichocarpa	1.44509		1.27065		1.31579
cotton_GLEAN_10027802	53	203966	2.1	2	2	65.77	3e-50	gi|224088206	predicted protein	Populus trichocarpa	1.3986		0.829187		1.07527
cotton_GLEAN_10038406	52	128744	3.9	3	3	92.77	0	gi|297746040	unnamed protein product	Vitis vinifera	1.18483	*	0.937207		1.04384
Garb_03232	51	187192	2.1	2	2	93.16	8e-63	gi|224133460	predicted protein	Populus trichocarpa	0.956023	*	0.949668		0.956023
cotton_GLEAN_10016365	51	54459	10.1	3	2	78.55	0	gi|296083315	unnamed protein product	Vitis vinifera	0.942507		1.37363		1.20919
cotton_GLEAN_10005978	50	66268	2.6	1	1	77.54	8e-112	gi|255636107	unknown	Glycine max	1.35135		0.807754		1.03306
Garb_18082	50	16041	24	2	2	100	4e-13	gi|255597501	conserved hypothetical protein	Ricinus communis	1.5949		1.00705		1.24844
Garb_05603	48	66554	3.8	2	2	78.37	2e-167	gi|225446797	uncharacterized protein LOC100254120	Vitis vinifera	1.46843		1.44718		1.43062
Garb_01128	46	76392	4.3	3	2	79.21	0	gi|297745944	unnamed protein product	Vitis vinifera	1.16279		0.749064		0.917431
Garb_20829	45	36083	4.8	1	1	80	5e-36	gi|255548411	conserved hypothetical protein	Ricinus communis	1.04058		1.74216		1.47493
Garb_25538	45	69868	2.3	1	1	91.11	2e-14	gi|212723366	uncharacterized protein LOC100192726	Zea mays	---		---		---
cotton_GLEAN_10020836	45	60234	5.7	2	1	82.72	7e-33	gi|255564407	conserved hypothetical protein	Ricinus communis	1.19904		1.08814		1.16959	*
Garb_21184	44	38781	4.5	1	1	83.78	3e-29	gi|388508728	unknown	Lotus japonicus	---		---		---
Garb_22537	44	69096	6.1	2	2	74.33	2e-165	gi|118486499	unknown	Populus trichocarpa	0.632911		1.42248		1.001
Garb_21734	44	162516	1.5	2	1	87.04	2e-53	gi|147846491	hypothetical protein VITISV_014157	Vitis vinifera	2.23214		1.28535		1.6835
Garb_04938	44	26386	4.1	1	1	54.35	1e-24	gi|242096748	hypothetical protein SORBIDRAFT_10g027460	Sorghum bicolor	0.454133		1.15207		0.810373
Garb_09273	43	29879	6.6	1	1	73.58	2e-91	gi|255538596	conserved hypothetical protein	Ricinus communis	---		---		---
cotton_GLEAN_10032383	43	56396	5.7	2	2	73.55	7e-122	gi|296081386	unnamed protein product	Vitis vinifera	0.673401		0.747943		0.712251
Garb_21014	43	49066	4.1	1	1	67.06	5e-135	gi|225451915	uncharacterized protein LOC100244706	Vitis vinifera	0.711238	*	0.97561		0.829187
Garb_08584	42	41644	11.9	2	2	43.88	3e-12	gi|224116468	predicted protein	Populus trichocarpa	1.1976		0.808407		0.971817
Garb_00407	42	33043	11.8	2	2	86.31	4e-63	gi|302144015	unnamed protein product	Vitis vinifera	1.16144		2.1097		1.5625
Garb_33776	41	75275	9.3	3	3	80.19	0	gi|296085057	unnamed protein product	Vitis vinifera	2.01613		1.24844		1.83824
Garb_11355	41	38508	6.9	1	1	76.51	7e-57	gi|255571827	protein with unknown function	Ricinus communis	0.630517		1.35685	*	1.10375
Garb_42520	40	19522	11.7	2	2	77.44	1e-59	gi|224083711	predicted protein	Populus trichocarpa	2.77008		0.944287		1.6129
Garb_03159	40	60212	2.5	1	1	81.95	8e-64	gi|190898408	expressed protein	Populus tremula	---		---		---
Garb_29086	39	124359	1.2	1	1	81.77	4e-172	gi|297745484	unnamed protein product	Vitis vinifera	---		---		---
Garb_23524	39	32538	10.7	2	2	95.12	2e-14	gi|296081252	unnamed protein product	Vitis vinifera	2.43309		1.43266		1.82149
cotton_GLEAN_10010980	39	108035	2.7	1	1	86.7	0	gi|296086321	unnamed protein product	Vitis vinifera	0.981354		1.06157		1.02041
Garb_26999	38	24893	10.2	1	1	76.36	4e-47	gi|388506188	unknown	Medicago truncatula	1.7331		0.837521		1.18765
Garb_37859	38	23369	9.2	1	1	68.75	2e-43	gi|351726413	uncharacterized protein LOC100500286	Glycine max	0.637349		0.664452		0.662691
Garb_03409	38	85813	2.1	1	1	83.51	9e-41	gi|187608845	Unknown protein DS12 from 2D-PAGE of leaf, chloroplastic	Oryza sativa subsp. indica	---		---		---
Garb_11935	37	98848	3.1	2	2	83.11	7e-99	gi|255578035	conserved hypothetical protein	Ricinus communis	1.4556		1.1976		1.30208	*
Garb_31423	37	149996	1.7	2	2	84.21	2e-43	gi|225454694	uncharacterized protein LOC100249521	Vitis vinifera	1.55039		0.82713		1.15875
Garb_17076	36	37956	5.5	1	1	89.66	3e-08	gi|149391183	unknown	Oryza sativa subsp. japonica	---		---		---
cotton_GLEAN_10005143	34	25886	10.3	2	2	52.13	6e-40	gi|224105211	predicted protein	Populus trichocarpa	0.979432		1.41443		1.15075
Garb_29957	34	164127	3.1	2	2	93.01	0	gi|147799445	hypothetical protein VITISV_009629	Vitis vinifera	1.02669		1.02564		1.00503
Garb_30322	32	31445	6.5	2	2	70.27	4e-20	gi|225444877	uncharacterized protein LOC100256150	Vitis vinifera	0.993049		0.909091		0.951475
Garb_10918	31	123741	1.7	1	1	70.49	5e-19	gi|255585352	villin 1-4, putative	Ricinus communis	---		---		---
Garb_11288	31	102908	1	1	1	78.18	9e-16	gi|255582888	conserved hypothetical protein	Ricinus communis	---		---		---
cotton_GLEAN_10018210	31	30890	8.1	2	2	45.65	4e-12	gi|224030379	unknown	Zea mays	2.30947		0.432152		1.0846
Garb_12046	31	56497	1.4	1	1	68.89	7e-146	gi|224115286	predicted protein	Populus trichocarpa	---		---		---
Garb_09108	31	31175	6.9	1	1	94.95	5e-122	gi|224119616	predicted protein	Populus trichocarpa	---		---		---
Garb_04503	30	31084	6.9	1	1	91.76	3e-33	gi|390986531	hypothetical protein, partial	Oryza eichingeri	---		---		---
Garb_29101	30	183390	1	1	1	86.05	2e-12	gi|108862846	expressed protein	Oryza sativa Japonica Group	---		---		---
cotton_GLEAN_10029183	29	54579	2.9	1	1	64.69	7e-118	gi|224105585	predicted protein	Populus trichocarpa	---		---		---
Garb_25275	28	56088	2.9	1	1	89.83	2e-24	gi|307136269	hypothetical protein	Cucumis melo subsp. melo	---		---		---
Garb_02816	26	50689	2.8	1	1	94.87	8e-16	gi|281314355	unknown, partial	Lycium chilense	---		---		---
Garb_33454	26	72487	3.6	2	2	72.79	4e-59	gi|297745631	unnamed protein product	Vitis vinifera	2.59067		1.10619		1.66945
Garb_10340	25	52019	7.2	2	2	76.97	8e-136	gi|296085572	unnamed protein product	Vitis vinifera	1.64745		1.69205		1.63399
cotton_GLEAN_10004093	367	44677	29.4	9	2	84.13	2e-82	gi|388500070	unknown known	Lotus japonicus	0.367	*	0.69	*	0.582	*
Garb_15201	78	96951	3.4	0	3	86.16	0	gi|224106732	predicted protein	Populus trichocarpa	2.353	*	1.454		1.775	*
cotton_GLEAN_10014707	403	54633	25.6	0	34	76.92	4e-21	gi|297736988	unnamed protein product	Vitis vinifera	2.317		1.177		1.717	*
cotton_GLEAN_10029653	128	75226	12.6	0	6	80.35	2e-131	gi|224092318|	predicted protein	Populus trichocarpa	1.789	*	1.271		1.521	*
athe accession of cotton AD genome annotation database
bNCBInr Accession
cSignificant difference
dsalt-treated protein samples and control protein samples were labeled with 113 and 115 tages, respectively.
esalt-treated protein samples and control protein samples were labeled with 114 and 116 tages, respectively.
fMean ratio corresponds to the protein reporter ion intensity originating from salt-treated protein samples (113 and 114) relative to fully control protein samples (115 and 116).

## Sheet: Peptides sequence
prot_hit_num	prot_acc	pep_seq	pep_scan_title
1	Garb_33066	IGASLIR	File6005 Spectrum451114 scans: 8780
1	Garb_33066	AQCLTFTSR	File6004 Spectrum426919 scans: 7365
1	Garb_33066	GYEVIDAMK	File5990 Spectrum101388 scans: 10907
1	Garb_33066	GYEVIDAMK	File5989 Spectrum77671 scans: 10957
1	Garb_33066	GYEVIDAMK	File5989 Spectrum77539 scans: 10816
1	Garb_33066	GYEVIDAMK	File5989 Spectrum77542 scans: 10819
1	Garb_33066	GYEVIDAMK	File5987 Spectrum31136 scans: 10956
1	Garb_33066	GYEVIDAMK	File6005 Spectrum453282 scans: 11093
1	Garb_33066	GYEVIDAMK	File6005 Spectrum453007 scans: 10799
1	Garb_33066	GYEVIDAMK	File5987 Spectrum31415 scans: 11254
1	Garb_33066	GYEVIDAMK	File6005 Spectrum453147 scans: 10949
1	Garb_33066	GYEVIDAMK	File6005 Spectrum452991 scans: 10782
1	Garb_33066	GYEVIDAMK	File6005 Spectrum453199 scans: 11004
1	Garb_33066	GYEVIDAMK	File5987 Spectrum31155 scans: 10976
1	Garb_33066	GYEVIDAMK	File5987 Spectrum31549 scans: 11397
1	Garb_33066	GYEVIDAMK	File5988 Spectrum54398 scans: 11035
1	Garb_33066	GYEVIDAMK	File5988 Spectrum54359 scans: 10993
1	Garb_33066	GYEVIDAMK	File6005 Spectrum453132 scans: 10933
1	Garb_33066	GYEVIDAMK	File6005 Spectrum450604 scans: 8236
1	Garb_33066	GYEVIDAMK	File6005 Spectrum453176 scans: 10979
1	Garb_33066	GYEVIDAMK	File5989 Spectrum74217 scans: 7272
1	Garb_33066	GYEVIDAMK	File5990 Spectrum97992 scans: 7284
1	Garb_33066	GYEVIDAMK	File5989 Spectrum74342 scans: 7406
1	Garb_33066	GYEVIDAMK	File5990 Spectrum98001 scans: 7294
1	Garb_33066	GYEVIDAMK	File6005 Spectrum450000 scans: 7592
1	Garb_33066	GYEVIDAMK	File5987 Spectrum28220 scans: 7846
1	Garb_33066	GYEVIDAMK	File6005 Spectrum449863 scans: 7446
1	Garb_33066	GYEVIDAMK	File6005 Spectrum449730 scans: 7304
1	Garb_33066	GYEVIDAMK	File5987 Spectrum28101 scans: 7719
1	Garb_33066	GYEVIDAMK	File6005 Spectrum449998 scans: 7590
1	Garb_33066	GYEVIDAMK	File5988 Spectrum51318 scans: 7749
1	Garb_33066	GYEVIDAMK	File5987 Spectrum27947 scans: 7554
1	Garb_33066	GYEVIDAMK	File5989 Spectrum74878 scans: 7977
1	Garb_33066	GYEVIDAMK	File5988 Spectrum51227 scans: 7652
1	Garb_33066	GYEVIDAMK	File6005 Spectrum449048 scans: 6576
1	Garb_33066	GYEVIDAMK	File5987 Spectrum28080 scans: 7696
1	Garb_33066	GYEVIDAMK	File5988 Spectrum51228 scans: 7653
1	Garb_33066	GYEVIDAMK	File5988 Spectrum51315 scans: 7746
1	Garb_33066	GYEVIDAMK	File5987 Spectrum28085 scans: 7702
1	Garb_33066	GYEVIDAMK	File5987 Spectrum28086 scans: 7703
1	Garb_33066	GYEVIDAMK	File5989 Spectrum74957 scans: 8062
1	Garb_33066	GYEVIDAMK	File5990 Spectrum98379 scans: 7697
1	Garb_33066	GYEVIDAMK	File5987 Spectrum27353 scans: 6921
1	Garb_33066	GYEVIDAMK	File5987 Spectrum30326 scans: 10092
1	Garb_33066	MGNISPLTGTEGEIR	File6000 Spectrum338729 scans: 10814
1	Garb_33066	MGNISPLTGTEGEIR	File5988 Spectrum51421 scans: 7859
1	Garb_33066	MGNISPLTGTEGEIR	File6001 Spectrum361599 scans: 11011
1	Garb_33066	MGNISPLTGTEGEIR	File6005 Spectrum452986 scans: 10777
1	Garb_33066	MGNISPLTGTEGEIR	File6002 Spectrum384627 scans: 11067
1	Garb_33066	MGNISPLTGTEGEIR	File6002 Spectrum384774 scans: 11223
1	Garb_33066	MGNISPLTGTEGEIR	File6002 Spectrum384346 scans: 10767
1	Garb_33066	MGNISPLTGTEGEIR	File6002 Spectrum384561 scans: 10996
1	Garb_33066	MGNISPLTGTEGEIR	File6003 Spectrum407262 scans: 10825
1	Garb_33066	MGNISPLTGTEGEIR	File6001 Spectrum362003 scans: 11442
1	Garb_33066	MGNISPLTGTEGEIR	File6001 Spectrum361878 scans: 11308
1	Garb_33066	MGNISPLTGTEGEIR	File6001 Spectrum361733 scans: 11154
1	Garb_33066	MGNISPLTGTEGEIR	File6001 Spectrum361866 scans: 11295
1	Garb_33066	MGNISPLTGTEGEIR	File6001 Spectrum361865 scans: 11294
1	Garb_33066	MGNISPLTGTEGEIR	File6001 Spectrum361868 scans: 11298
1	Garb_33066	MGNISPLTGTEGEIR	File6002 Spectrum384491 scans: 10922
1	Garb_33066	MGNISPLTGTEGEIR	File6002 Spectrum384475 scans: 10905
1	Garb_33066	MGNISPLTGTEGEIR	File6001 Spectrum361731 scans: 11151
1	Garb_33066	MGNISPLTGTEGEIR	File6002 Spectrum384610 scans: 11049
1	Garb_33066	MGNISPLTGTEGEIR	File6002 Spectrum383745 scans: 10126
1	Garb_33066	MGNISPLTGTEGEIR	File6001 Spectrum359798 scans: 9090
1	Garb_33066	MGNISPLTGTEGEIR	File5989 Spectrum73806 scans: 6834
1	Garb_33066	MGNISPLTGTEGEIR	File6005 Spectrum450720 scans: 8360
1	Garb_33066	MGNISPLTGTEGEIR	File6002 Spectrum382114 scans: 8386
1	Garb_33066	MGNISPLTGTEGEIR	File6002 Spectrum382256 scans: 8538
1	Garb_33066	MGNISPLTGTEGEIR	File6002 Spectrum382255 scans: 8537
1	Garb_33066	MGNISPLTGTEGEIR	File6001 Spectrum359644 scans: 8925
1	Garb_33066	MGNISPLTGTEGEIR	File6002 Spectrum382120 scans: 8393
1	Garb_33066	MGNISPLTGTEGEIR	File6003 Spectrum404964 scans: 8374
1	Garb_33066	MGNISPLTGTEGEIR	File6001 Spectrum359392 scans: 8656
1	Garb_33066	MGNISPLTGTEGEIR	File6002 Spectrum382437 scans: 8731
1	Garb_33066	MGNISPLTGTEGEIR	File6003 Spectrum404877 scans: 8281
1	Garb_33066	MGNISPLTGTEGEIR	File6001 Spectrum359500 scans: 8772
1	Garb_33066	MGNISPLTGTEGEIR	File6004 Spectrum427925 scans: 8438
1	Garb_33066	MGNISPLTGTEGEIR	File6004 Spectrum427790 scans: 8294
1	Garb_33066	MGNISPLTGTEGEIR	File6003 Spectrum405023 scans: 8437
1	Garb_33066	MGNISPLTGTEGEIR	File6001 Spectrum359663 scans: 8946
1	Garb_33066	SDQNLFSTEGADTIEIVNR	File5999 Spectrum319124 scans: 13929
1	Garb_33066	SDQNLFSTEGADTIEIVNR	File5999 Spectrum321196 scans: 16139
1	Garb_33066	SDQNLFSTEGADTIEIVNR	File5997 Spectrum271009 scans: 12292
1	Garb_33066	SDQNLFSTEGADTIEIVNR	File5999 Spectrum319895 scans: 14751
1	Garb_33066	SDQNLFSTEGADTIEIVNR	File5999 Spectrum320343 scans: 15229
1	Garb_33066	SDQNLFSTEGADTIEIVNR	File5999 Spectrum320295 scans: 15178
1	Garb_33066	SDQNLFSTEGADTIEIVNR	File5999 Spectrum320429 scans: 15321
1	Garb_33066	SDQNLFSTEGADTIEIVNR	File5999 Spectrum318812 scans: 13596
1	Garb_33066	SDQNLFSTEGADTIEIVNR	File5999 Spectrum318997 scans: 13793
1	Garb_33066	SDQNLFSTEGADTIEIVNR	File5999 Spectrum323158 scans: 18232
1	Garb_33066	SDQNLFSTEGADTIEIVNR	File5999 Spectrum321252 scans: 16199
1	Garb_33066	SDQNLFSTEGADTIEIVNR	File5997 Spectrum271024 scans: 12308
1	Garb_33066	SDQNLFSTEGADTIEIVNR	File6000 Spectrum340458 scans: 12658
1	Garb_33066	SDQNLFSTEGADTIEIVNR	File6001 Spectrum363709 scans: 13261
1	Garb_33066	SDQNLFSTEGADTIEIVNR	File5999 Spectrum319257 scans: 14071
1	Garb_33066	SDQNLFSTEGADTIEIVNR	File5999 Spectrum320648 scans: 15554
1	Garb_33066	SDQNLFSTEGADTIEIVNR	File5999 Spectrum318192 scans: 12935
1	Garb_33066	SDQNLFSTEGADTIEIVNR	File5997 Spectrum270251 scans: 11483
1	Garb_33066	SDQNLFSTEGADTIEIVNR	File5999 Spectrum317787 scans: 12503
1	Garb_33066	SDQNLFSTEGADTIEIVNR	File5999 Spectrum321843 scans: 16829
1	Garb_33066	SDQNLFSTEGADTIEIVNR	File5999 Spectrum318681 scans: 13456
1	Garb_33066	SDQNLFSTEGADTIEIVNR	File5999 Spectrum319736 scans: 14581
1	Garb_33066	SDQNLFSTEGADTIEIVNR	File5999 Spectrum323029 scans: 18094
1	Garb_33066	SDQNLFSTEGADTIEIVNR	File5999 Spectrum317828 scans: 12546
1	Garb_33066	SDQNLFSTEGADTIEIVNR	File5999 Spectrum317829 scans: 12547
1	Garb_33066	SDQNLFSTEGADTIEIVNR	File5999 Spectrum321009 scans: 15939
1	Garb_33066	SDQNLFSTEGADTIEIVNR	File5999 Spectrum322889 scans: 17945
1	Garb_33066	SDQNLFSTEGADTIEIVNR	File5999 Spectrum319890 scans: 14746
1	Garb_33066	SDQNLFSTEGADTIEIVNR	File5999 Spectrum318552 scans: 13319
1	Garb_33066	SDQNLFSTEGADTIEIVNR	File6003 Spectrum409361 scans: 13064
1	Garb_33066	SDQNLFSTEGADTIEIVNR	File6001 Spectrum363716 scans: 13269
1	Garb_33066	SDQNLFSTEGADTIEIVNR	File6000 Spectrum340448 scans: 12648
1	Garb_33066	SDQNLFSTEGADTIEIVNR	File5999 Spectrum321527 scans: 16492
1	Garb_33066	SDQNLFSTEGADTIEIVNR	File5999 Spectrum323453 scans: 18546
1	Garb_33066	SDQNLFSTEGADTIEIVNR	File5999 Spectrum317838 scans: 12557
1	Garb_33066	SDQNLFSTEGADTIEIVNR	File5999 Spectrum318327 scans: 13079
1	Garb_33066	SDQNLFSTEGADTIEIVNR	File5999 Spectrum319392 scans: 14215
1	Garb_33066	SDQNLFSTEGADTIEIVNR	File5999 Spectrum318576 scans: 13344
1	Garb_33066	SDQNLFSTEGADTIEIVNR	File6002 Spectrum386342 scans: 12896
1	Garb_33066	SDQNLFSTEGADTIEIVNR	File5999 Spectrum317588 scans: 12290
1	Garb_33066	SDQNLFSTEGADTIEIVNR	File6000 Spectrum340607 scans: 12817
1	Garb_33066	SDQNLFSTEGADTIEIVNR	File5999 Spectrum322222 scans: 17233
1	Garb_33066	SDQNLFSTEGADTIEIVNR	File5999 Spectrum317908 scans: 12632
1	Garb_33066	SDQNLFSTEGADTIEIVNR	File5999 Spectrum321659 scans: 16633
1	Garb_33066	SDQNLFSTEGADTIEIVNR	File5999 Spectrum317243 scans: 11922
1	Garb_33066	SDQNLFSTEGADTIEIVNR	File5999 Spectrum322284 scans: 17299
1	Garb_33066	SDQNLFSTEGADTIEIVNR	File5999 Spectrum320967 scans: 15895
1	Garb_33066	SDQNLFSTEGADTIEIVNR	File5999 Spectrum317639 scans: 12345
1	Garb_33066	SDQNLFSTEGADTIEIVNR	File5999 Spectrum318103 scans: 12840
1	Garb_33066	SDQNLFSTEGADTIEIVNR	File5999 Spectrum318104 scans: 12841
1	Garb_33066	SDQNLFSTEGADTIEIVNR	File5999 Spectrum318312 scans: 13063
1	Garb_33066	SDQNLFSTEGADTIEIVNR	File5999 Spectrum318702 scans: 13479
1	Garb_33066	SDQNLFSTEGADTIEIVNR	File5999 Spectrum318058 scans: 12792
1	Garb_33066	SDQNLFSTEGADTIEIVNR	File5999 Spectrum318042 scans: 12775
1	Garb_33066	SDQNLFSTEGADTIEIVNR	File5999 Spectrum317773 scans: 12488
1	Garb_33066	SDQNLFSTEGADTIEIVNR	File5999 Spectrum322080 scans: 17082
1	Garb_33066	SDQNLFSTEGADTIEIVNR	File5999 Spectrum318177 scans: 12919
1	Garb_33066	SDQNLFSTEGADTIEIVNR	File5999 Spectrum320866 scans: 15787
1	Garb_33066	SDQNLFSTEGADTIEIVNR	File5999 Spectrum317923 scans: 12648
1	Garb_33066	SDQNLFSTEGADTIEIVNR	File5999 Spectrum318434 scans: 13193
1	Garb_33066	SDQNLFSTEGADTIEIVNR	File5999 Spectrum317969 scans: 12697
1	Garb_33066	SDQNLFSTEGADTIEIVNR	File5999 Spectrum317970 scans: 12698
1	Garb_33066	SDQNLFSTEGADTIEIVNR	File5999 Spectrum317972 scans: 12700
1	Garb_33066	SDQNLFSTEGADTIEIVNR	File5999 Spectrum323301 scans: 18384
1	Garb_33066	SDQNLFSTEGADTIEIVNR	File6004 Spectrum432200 scans: 12998
1	Garb_33066	SDQNLFSTEGADTIEIVNR	File5999 Spectrum320836 scans: 15755
1	Garb_33066	SDQNLFSTEGADTIEIVNR	File5999 Spectrum321390 scans: 16346
1	Garb_33066	SDQNLFSTEGADTIEIVNR	File5997 Spectrum270247 scans: 11479
1	Garb_33066	SDQNLFSTEGADTIEIVNR	File6000 Spectrum340580 scans: 12789
1	Garb_33066	SDQNLFSTEGADTIEIVNR	File5997 Spectrum271144 scans: 12436
1	Garb_33066	SDQNLFSTEGADTIEIVNR	File5999 Spectrum317976 scans: 12704
1	Garb_33066	SDQNLFSTEGADTIEIVNR	File5999 Spectrum317231 scans: 11909
1	Garb_33066	SDQNLFSTEGADTIEIVNR	File5999 Spectrum320474 scans: 15369
1	Garb_33066	SDQNLFSTEGADTIEIVNR	File5999 Spectrum317871 scans: 12592
1	Garb_33066	SDQNLFSTEGADTIEIVNR	File6005 Spectrum455025 scans: 12952
1	Garb_33066	SDQNLFSTEGADTIEIVNR	File5999 Spectrum318976 scans: 13771
1	Garb_33066	SDQNLFSTEGADTIEIVNR	File6002 Spectrum386338 scans: 12892
1	Garb_33066	SDQNLFSTEGADTIEIVNR	File5999 Spectrum319271 scans: 14085
1	Garb_33066	SDQNLFSTEGADTIEIVNR	File5999 Spectrum319734 scans: 14579
1	Garb_33066	SDQNLFSTEGADTIEIVNR	File5999 Spectrum317903 scans: 12626
1	Garb_33066	SDQNLFSTEGADTIEIVNR	File5999 Spectrum321545 scans: 16511
1	Garb_33066	SDQNLFSTEGADTIEIVNR	File5997 Spectrum270668 scans: 11928
1	Garb_33066	SDQNLFSTEGADTIEIVNR	File6000 Spectrum340763 scans: 12984
1	Garb_33066	SDQNLFSTEGADTIEIVNR	File5999 Spectrum319109 scans: 13913
1	Garb_33066	SDQNLFSTEGADTIEIVNR	File5999 Spectrum318842 scans: 13628
2	cotton_GLEAN_10004349	AFTVEAPK	File5992 Spectrum147574 scans: 7873
2	cotton_GLEAN_10004349	AFTVEAPK	File5993 Spectrum170989 scans: 7855
2	cotton_GLEAN_10004349	AFTVEAPK	File5992 Spectrum147590 scans: 7890
2	cotton_GLEAN_10004349	AFTVEAPK	File5990 Spectrum98718 scans: 8059
2	cotton_GLEAN_10004349	AFTVEAPK	File5989 Spectrum75301 scans: 8429
2	cotton_GLEAN_10004349	AFTVEAPK	File5990 Spectrum98855 scans: 8205
2	cotton_GLEAN_10004349	AFTVEAPK	File5990 Spectrum98990 scans: 8349
2	cotton_GLEAN_10004349	AFTVEAPK	File5990 Spectrum99005 scans: 8365
2	cotton_GLEAN_10004349	AFTVEAPK	File5990 Spectrum98587 scans: 7919
2	cotton_GLEAN_10004349	AFTVEAPK	File5990 Spectrum98988 scans: 8347
2	cotton_GLEAN_10004349	AFTVEAPK	File5990 Spectrum98740 scans: 8082
2	cotton_GLEAN_10004349	AFTVEAPK	File5990 Spectrum98682 scans: 8020
2	cotton_GLEAN_10004349	AFTVEAPK	File5990 Spectrum98649 scans: 7985
2	cotton_GLEAN_10004349	VWPTAAPNAVK	File5993 Spectrum172738 scans: 9720
2	cotton_GLEAN_10004349	VWPTAAPNAVK	File5993 Spectrum172695 scans: 9675
2	cotton_GLEAN_10004349	VWPTAAPNAVK	File5993 Spectrum172686 scans: 9665
2	cotton_GLEAN_10004349	VWPTAAPNAVK	File5990 Spectrum100151 scans: 9587
2	cotton_GLEAN_10004349	VWPTAAPNAVK	File5990 Spectrum100252 scans: 9695
2	cotton_GLEAN_10004349	VWPTAAPNAVK	File5991 Spectrum125972 scans: 11266
2	cotton_GLEAN_10004349	VWPTAAPNAVK	File5992 Spectrum149641 scans: 10078
2	cotton_GLEAN_10004349	VWPTAAPNAVK	File5990 Spectrum100578 scans: 10043
2	cotton_GLEAN_10004349	VWPTAAPNAVK	File5991 Spectrum125911 scans: 11201
2	cotton_GLEAN_10004349	VWPTAAPNAVK	File5993 Spectrum172955 scans: 9952
2	cotton_GLEAN_10004349	VWPTAAPNAVK	File5990 Spectrum100161 scans: 9598
2	cotton_GLEAN_10004349	VWPTAAPNAVK	File5991 Spectrum126047 scans: 11346
2	cotton_GLEAN_10004349	VWPTAAPNAVK	File5991 Spectrum126048 scans: 11347
2	cotton_GLEAN_10004349	VWPTAAPNAVK	File5993 Spectrum172998 scans: 9998
2	cotton_GLEAN_10004349	VWPTAAPNAVK	File5990 Spectrum100293 scans: 9739
2	cotton_GLEAN_10004349	SIEVEANPSSGSIVK	File5988 Spectrum51818 scans: 8283
2	cotton_GLEAN_10004349	SIEVEANPSSGSIVK	File5988 Spectrum51684 scans: 8140
2	cotton_GLEAN_10004349	SIEVEANPSSGSIVK	File5988 Spectrum51556 scans: 8003
2	cotton_GLEAN_10004349	SIEVEANPSSGSIVK	File5988 Spectrum51540 scans: 7986
2	cotton_GLEAN_10004349	SIEVEANPSSGSIVK	File5988 Spectrum51834 scans: 8300
2	cotton_GLEAN_10004349	SIEVEANPSSGSIVK	File5988 Spectrum51697 scans: 8154
2	cotton_GLEAN_10004349	SIEVEANPSSGSIVK	File6004 Spectrum427571 scans: 8060
2	cotton_GLEAN_10004349	SIEVEANPSSGSIVK	File6005 Spectrum450644 scans: 8279
2	cotton_GLEAN_10004349	SIEVEANPSSGSIVK	File5988 Spectrum51965 scans: 8439
2	cotton_GLEAN_10004349	SIEVEANPSSGSIVK	File6005 Spectrum450804 scans: 8449
2	cotton_GLEAN_10004349	SIEVEANPSSGSIVK	File5987 Spectrum28843 scans: 8510
2	cotton_GLEAN_10004349	SIEVEANPSSGSIVK	File5987 Spectrum28828 scans: 8494
2	cotton_GLEAN_10004349	SIEVEANPSSGSIVK	File5987 Spectrum28957 scans: 8632
2	cotton_GLEAN_10004349	SIEVEANPSSGSIVK	File6005 Spectrum450762 scans: 8405
2	cotton_GLEAN_10004349	SIEVEANPSSGSIVK	File6005 Spectrum450868 scans: 8518
2	cotton_GLEAN_10004349	SIEVEANPSSGSIVK	File6005 Spectrum451177 scans: 8847
2	cotton_GLEAN_10004349	SIEVEANPSSGSIVK	File6005 Spectrum450926 scans: 8579
2	cotton_GLEAN_10004349	SIEVEANPSSGSIVK	File6004 Spectrum427546 scans: 8033
2	cotton_GLEAN_10004349	SIEVEANPSSGSIVK	File6004 Spectrum427718 scans: 8217
2	cotton_GLEAN_10004349	SIEVEANPSSGSIVK	File6005 Spectrum450582 scans: 8213
2	cotton_GLEAN_10004349	SIEVEANPSSGSIVK	File6005 Spectrum450613 scans: 8246
2	cotton_GLEAN_10004349	SIEVEANPSSGSIVK	File5988 Spectrum52246 scans: 8739
2	cotton_GLEAN_10004349	SIEVEANPSSGSIVK	File6005 Spectrum451185 scans: 8856
2	cotton_GLEAN_10004349	SIEVEANPSSGSIVK	File6004 Spectrum427675 scans: 8171
2	cotton_GLEAN_10004349	SIEVEANPSSGSIVK	File5988 Spectrum52103 scans: 8587
2	cotton_GLEAN_10004349	SIEVEANPSSGSIVK	File6004 Spectrum427998 scans: 8516
2	cotton_GLEAN_10004349	SIEVEANPSSGSIVK	File6004 Spectrum427799 scans: 8303
2	cotton_GLEAN_10004349	SIEVEANPSSGSIVK	File6004 Spectrum427810 scans: 8315
2	cotton_GLEAN_10004349	SIEVEANPSSGSIVK	File5989 Spectrum75644 scans: 8794
2	cotton_GLEAN_10004349	SIEVEANPSSGSIVK	File5987 Spectrum28984 scans: 8661
2	cotton_GLEAN_10004349	SIEVEANPSSGSIVK	File6004 Spectrum427826 scans: 8332
2	cotton_GLEAN_10004349	SIEVEANPSSGSIVK	File6004 Spectrum427829 scans: 8335
2	cotton_GLEAN_10004349	SIEVEANPSSGSIVK	File6005 Spectrum450899 scans: 8551
2	cotton_GLEAN_10004349	SIEVEANPSSGSIVK	File5988 Spectrum52010 scans: 8487
2	cotton_GLEAN_10004349	SIEVEANPSSGSIVK	File6004 Spectrum427750 scans: 8251
2	cotton_GLEAN_10004349	SIEVEANPSSGSIVK	File6004 Spectrum428237 scans: 8771
2	cotton_GLEAN_10004349	SIEVEANPSSGSIVK	File6004 Spectrum427890 scans: 8400
2	cotton_GLEAN_10004349	SIEVEANPSSGSIVK	File6004 Spectrum427853 scans: 8361
2	cotton_GLEAN_10004349	SIEVEANPSSGSIVK	File6004 Spectrum427780 scans: 8283
2	cotton_GLEAN_10004349	SIEVEANPSSGSIVK	File6005 Spectrum450717 scans: 8357
2	cotton_GLEAN_10004349	SIEVEANPSSGSIVK	File6004 Spectrum427683 scans: 8180
2	cotton_GLEAN_10004349	SIEVEANPSSGSIVK	File6004 Spectrum428132 scans: 8659
2	cotton_GLEAN_10004349	SIEVEANPSSGSIVK	File6004 Spectrum427969 scans: 8485
2	cotton_GLEAN_10004349	GVVTYDYESTSPVAPSR	File6002 Spectrum381868 scans: 8124
2	cotton_GLEAN_10004349	GVVTYDYESTSPVAPSR	File6001 Spectrum359501 scans: 8773
2	cotton_GLEAN_10004349	GVVTYDYESTSPVAPSR	File6000 Spectrum336485 scans: 8421
2	cotton_GLEAN_10004349	GVVTYDYESTSPVAPSR	File6000 Spectrum336570 scans: 8511
2	cotton_GLEAN_10004349	GVVTYDYESTSPVAPSR	File6000 Spectrum336556 scans: 8496
2	cotton_GLEAN_10004349	GVVTYDYESTSPVAPSR	File5999 Spectrum313681 scans: 8123
2	cotton_GLEAN_10004349	GVVTYDYESTSPVAPSR	File6002 Spectrum382229 scans: 8509
2	cotton_GLEAN_10004349	GVVTYDYESTSPVAPSR	File6001 Spectrum359520 scans: 8793
2	cotton_GLEAN_10004349	GVVTYDYESTSPVAPSR	File6000 Spectrum336605 scans: 8549
2	cotton_GLEAN_10004349	GVVTYDYESTSPVAPSR	File6000 Spectrum336890 scans: 8853
2	cotton_GLEAN_10004349	GVVTYDYESTSPVAPSR	File6000 Spectrum336757 scans: 8711
2	cotton_GLEAN_10004349	GVVTYDYESTSPVAPSR	File6000 Spectrum336463 scans: 8397
2	cotton_GLEAN_10004349	GVVTYDYESTSPVAPSR	File5999 Spectrum313635 scans: 8074
2	cotton_GLEAN_10004349	GVVTYDYESTSPVAPSR	File5992 Spectrum148679 scans: 9052
2	cotton_GLEAN_10004349	GVVTYDYESTSPVAPSR	File6003 Spectrum404682 scans: 8073
2	cotton_GLEAN_10004349	INFVEGLPFQYMK	File5989 Spectrum83790 scans: 17483
2	cotton_GLEAN_10004349	INFVEGLPFQYMK	File5989 Spectrum83849 scans: 17546
2	cotton_GLEAN_10004349	INFVEGLPFQYMK	File5989 Spectrum83850 scans: 17547
2	cotton_GLEAN_10004349	INFVEGLPFQYMK	File5989 Spectrum83802 scans: 17496
2	cotton_GLEAN_10004349	INFVEGLPFQYMK	File5987 Spectrum37112 scans: 17330
2	cotton_GLEAN_10004349	INFVEGLPFQYMK	File5987 Spectrum37146 scans: 17367
2	cotton_GLEAN_10004349	INFVEGLPFQYMK	File5988 Spectrum60700 scans: 17757
2	cotton_GLEAN_10004349	INFVEGLPFQYMK	File6005 Spectrum459214 scans: 17420
2	cotton_GLEAN_10004349	INFVEGLPFQYMK	File5987 Spectrum37206 scans: 17431
2	cotton_GLEAN_10004349	INFVEGLPFQYMK	File5987 Spectrum37093 scans: 17310
2	cotton_GLEAN_10004349	INFVEGLPFQYMK	File5987 Spectrum37016 scans: 17228
2	cotton_GLEAN_10004349	INFVEGLPFQYMK	File5989 Spectrum83601 scans: 17282
2	cotton_GLEAN_10004349	INFVEGLPFQYMK	File5987 Spectrum37159 scans: 17381
2	cotton_GLEAN_10004349	INFVEGLPFQYMK	File6005 Spectrum459223 scans: 17430
2	cotton_GLEAN_10004349	INFVEGLPFQYMK	File5987 Spectrum37083 scans: 17299
2	cotton_GLEAN_10004349	INFVEGLPFQYMK	File5987 Spectrum37221 scans: 17447
2	cotton_GLEAN_10004349	INFVEGLPFQYMK	File5987 Spectrum37296 scans: 17527
2	cotton_GLEAN_10004349	INFVEGLPFQYMK	File5987 Spectrum37280 scans: 17510
2	cotton_GLEAN_10004349	INFVEGLPFQYMK	File6005 Spectrum459362 scans: 17578
2	cotton_GLEAN_10004349	INFVEGLPFQYMK	File5988 Spectrum60598 scans: 17648
2	cotton_GLEAN_10004349	INFVEGLPFQYMK	File6005 Spectrum459239 scans: 17447
2	cotton_GLEAN_10004349	INFVEGLPFQYMK	File5987 Spectrum37027 scans: 17240
2	cotton_GLEAN_10004349	INFVEGLPFQYMK	File5988 Spectrum60729 scans: 17788
2	cotton_GLEAN_10004349	INFVEGLPFQYMK	File5987 Spectrum37272 scans: 17501
2	cotton_GLEAN_10004349	INFVEGLPFQYMK	File6005 Spectrum459376 scans: 17593
2	cotton_GLEAN_10004349	INFVEGLPFQYMK	File6005 Spectrum457619 scans: 15719
2	cotton_GLEAN_10004349	INFVEGLPFQYMK	File5987 Spectrum35637 scans: 15757
2	cotton_GLEAN_10004349	INFVEGLPFQYMK	File5988 Spectrum59079 scans: 16028
2	cotton_GLEAN_10004349	INFVEGLPFQYMK	File5988 Spectrum58975 scans: 15917
2	cotton_GLEAN_10004349	INFVEGLPFQYMK	File5987 Spectrum35794 scans: 15925
2	cotton_GLEAN_10004349	INFVEGLPFQYMK	File5988 Spectrum59107 scans: 16058
2	cotton_GLEAN_10004349	INFVEGLPFQYMK	File5987 Spectrum35671 scans: 15793
2	cotton_GLEAN_10004349	INFVEGLPFQYMK	File5987 Spectrum35766 scans: 15895
2	cotton_GLEAN_10004349	INFVEGLPFQYMK	File6005 Spectrum457536 scans: 15630
2	cotton_GLEAN_10004349	FYTVGDNVITEDEIK	File5992 Spectrum150307 scans: 10788
2	cotton_GLEAN_10004349	FYTVGDNVITEDEIK	File5993 Spectrum174121 scans: 11196
2	cotton_GLEAN_10004349	FYTVGDNVITEDEIK	File6005 Spectrum455230 scans: 13170
2	cotton_GLEAN_10004349	FYTVGDNVITEDEIK	File5992 Spectrum150368 scans: 10853
2	cotton_GLEAN_10004349	FYTVGDNVITEDEIK	File6004 Spectrum432690 scans: 13520
2	cotton_GLEAN_10004349	FYTVGDNVITEDEIK	File6003 Spectrum410130 scans: 13884
2	cotton_GLEAN_10004349	FYTVGDNVITEDEIK	File6002 Spectrum386799 scans: 13383
2	cotton_GLEAN_10004349	FYTVGDNVITEDEIK	File5992 Spectrum150432 scans: 10922
2	cotton_GLEAN_10004349	FYTVGDNVITEDEIK	File6004 Spectrum432828 scans: 13668
2	cotton_GLEAN_10004349	FYTVGDNVITEDEIK	File6004 Spectrum432814 scans: 13653
2	cotton_GLEAN_10004349	FYTVGDNVITEDEIK	File6002 Spectrum386813 scans: 13398
2	cotton_GLEAN_10004349	FYTVGDNVITEDEIK	File5987 Spectrum33367 scans: 13336
2	cotton_GLEAN_10004349	FYTVGDNVITEDEIK	File6003 Spectrum409957 scans: 13699
2	cotton_GLEAN_10004349	FYTVGDNVITEDEIK	File6003 Spectrum409915 scans: 13655
2	cotton_GLEAN_10004349	FYTVGDNVITEDEIK	File6004 Spectrum432705 scans: 13536
2	cotton_GLEAN_10004349	FYTVGDNVITEDEIK	File6003 Spectrum409870 scans: 13607
2	cotton_GLEAN_10004349	FYTVGDNVITEDEIK	File6002 Spectrum386728 scans: 13308
2	cotton_GLEAN_10004349	FYTVGDNVITEDEIK	File6002 Spectrum386264 scans: 12813
2	cotton_GLEAN_10004349	FYTVGDNVITEDEIK	File6003 Spectrum409635 scans: 13356
2	cotton_GLEAN_10004349	FYTVGDNVITEDEIK	File6003 Spectrum409675 scans: 13399
2	cotton_GLEAN_10004349	FYTVGDNVITEDEIK	File6003 Spectrum409687 scans: 13411
2	cotton_GLEAN_10004349	FYTVGDNVITEDEIK	File6003 Spectrum409809 scans: 13542
2	cotton_GLEAN_10004349	FYTVGDNVITEDEIK	File6003 Spectrum410062 scans: 13811
2	cotton_GLEAN_10004349	FYTVGDNVITEDEIK	File5992 Spectrum150476 scans: 10969
2	cotton_GLEAN_10004349	FYTVGDNVITEDEIK	File5992 Spectrum150344 scans: 10828
2	cotton_GLEAN_10004349	FYTVGDNVITEDEIK	File6002 Spectrum386278 scans: 12828
2	cotton_GLEAN_10004349	FYTVGDNVITEDEIK	File6003 Spectrum409316 scans: 13016
2	cotton_GLEAN_10004349	FYTVGDNVITEDEIK	File6003 Spectrum409736 scans: 13464
2	cotton_GLEAN_10004349	GVVTYDYESTSPVAPSR	File5993 Spectrum171324 scans: 8212
2	cotton_GLEAN_10004349	GVVTYDYESTSPVAPSR	File5993 Spectrum171479 scans: 8377
2	cotton_GLEAN_10004349	GVVTYDYESTSPVAPSR	File5992 Spectrum147833 scans: 8149
2	cotton_GLEAN_10004349	GVVTYDYESTSPVAPSR	File5993 Spectrum171453 scans: 8350
2	cotton_GLEAN_10004349	GVVTYDYESTSPVAPSR	File5992 Spectrum147942 scans: 8266
2	cotton_GLEAN_10004349	GVVTYDYESTSPVAPSR	File5992 Spectrum147866 scans: 8185
2	cotton_GLEAN_10004349	GVVTYDYESTSPVAPSR	File5992 Spectrum147867 scans: 8186
2	cotton_GLEAN_10004349	GVVTYDYESTSPVAPSR	File5992 Spectrum147989 scans: 8316
2	cotton_GLEAN_10004349	GVVTYDYESTSPVAPSR	File5993 Spectrum171499 scans: 8399
2	cotton_GLEAN_10004349	GVVTYDYESTSPVAPSR	File5992 Spectrum147956 scans: 8281
2	cotton_GLEAN_10004349	GVVTYDYESTSPVAPSR	File5992 Spectrum147826 scans: 8142
2	cotton_GLEAN_10004349	GVVTYDYESTSPVAPSR	File5993 Spectrum171585 scans: 8491
2	cotton_GLEAN_10004349	INFVEGLPFQYMK	File5998 Spectrum298064 scans: 16511
2	cotton_GLEAN_10004349	HQIGGHDESNFSYSYDLIEGGPLGDK	File5996 Spectrum248056 scans: 13277
2	cotton_GLEAN_10004349	HQIGGHDESNFSYSYDLIEGGPLGDK	File5996 Spectrum248096 scans: 13320
3	Garb_33533	AFTVEAPK	File5992 Spectrum147574 scans: 7873
3	Garb_33533	AFTVEAPK	File5993 Spectrum170989 scans: 7855
3	Garb_33533	AFTVEAPK	File5992 Spectrum147590 scans: 7890
3	Garb_33533	AFTVEAPK	File5990 Spectrum98718 scans: 8059
3	Garb_33533	AFTVEAPK	File5989 Spectrum75301 scans: 8429
3	Garb_33533	AFTVEAPK	File5990 Spectrum98855 scans: 8205
3	Garb_33533	AFTVEAPK	File5990 Spectrum98990 scans: 8349
3	Garb_33533	AFTVEAPK	File5990 Spectrum99005 scans: 8365
3	Garb_33533	AFTVEAPK	File5990 Spectrum98587 scans: 7919
3	Garb_33533	AFTVEAPK	File5990 Spectrum98988 scans: 8347
3	Garb_33533	AFTVEAPK	File5990 Spectrum98740 scans: 8082
3	Garb_33533	AFTVEAPK	File5990 Spectrum98682 scans: 8020
3	Garb_33533	AFTVEAPK	File5990 Spectrum98649 scans: 7985
3	Garb_33533	VWPTAAPNAVK	File5993 Spectrum172738 scans: 9720
3	Garb_33533	VWPTAAPNAVK	File5993 Spectrum172695 scans: 9675
3	Garb_33533	VWPTAAPNAVK	File5993 Spectrum172686 scans: 9665
3	Garb_33533	VWPTAAPNAVK	File5990 Spectrum100151 scans: 9587
3	Garb_33533	VWPTAAPNAVK	File5990 Spectrum100252 scans: 9695
3	Garb_33533	VWPTAAPNAVK	File5991 Spectrum125972 scans: 11266
3	Garb_33533	VWPTAAPNAVK	File5992 Spectrum149641 scans: 10078
3	Garb_33533	VWPTAAPNAVK	File5990 Spectrum100578 scans: 10043
3	Garb_33533	VWPTAAPNAVK	File5991 Spectrum125911 scans: 11201
3	Garb_33533	VWPTAAPNAVK	File5993 Spectrum172955 scans: 9952
3	Garb_33533	VWPTAAPNAVK	File5990 Spectrum100161 scans: 9598
3	Garb_33533	VWPTAAPNAVK	File5991 Spectrum126047 scans: 11346
3	Garb_33533	VWPTAAPNAVK	File5991 Spectrum126048 scans: 11347
3	Garb_33533	VWPTAAPNAVK	File5993 Spectrum172998 scans: 9998
3	Garb_33533	VWPTAAPNAVK	File5990 Spectrum100293 scans: 9739
3	Garb_33533	SIEVEANPSSGSIVK	File5988 Spectrum51818 scans: 8283
3	Garb_33533	SIEVEANPSSGSIVK	File5988 Spectrum51684 scans: 8140
3	Garb_33533	SIEVEANPSSGSIVK	File5988 Spectrum51556 scans: 8003
3	Garb_33533	SIEVEANPSSGSIVK	File5988 Spectrum51540 scans: 7986
3	Garb_33533	SIEVEANPSSGSIVK	File5988 Spectrum51834 scans: 8300
3	Garb_33533	SIEVEANPSSGSIVK	File5988 Spectrum51697 scans: 8154
3	Garb_33533	SIEVEANPSSGSIVK	File6004 Spectrum427571 scans: 8060
3	Garb_33533	SIEVEANPSSGSIVK	File6005 Spectrum450644 scans: 8279
3	Garb_33533	SIEVEANPSSGSIVK	File5988 Spectrum51965 scans: 8439
3	Garb_33533	SIEVEANPSSGSIVK	File6005 Spectrum450804 scans: 8449
3	Garb_33533	SIEVEANPSSGSIVK	File5987 Spectrum28843 scans: 8510
3	Garb_33533	SIEVEANPSSGSIVK	File5987 Spectrum28828 scans: 8494
3	Garb_33533	SIEVEANPSSGSIVK	File5987 Spectrum28957 scans: 8632
3	Garb_33533	SIEVEANPSSGSIVK	File6005 Spectrum450762 scans: 8405
3	Garb_33533	SIEVEANPSSGSIVK	File6005 Spectrum450868 scans: 8518
3	Garb_33533	SIEVEANPSSGSIVK	File6005 Spectrum451177 scans: 8847
3	Garb_33533	SIEVEANPSSGSIVK	File6005 Spectrum450926 scans: 8579
3	Garb_33533	SIEVEANPSSGSIVK	File6004 Spectrum427546 scans: 8033
3	Garb_33533	SIEVEANPSSGSIVK	File6004 Spectrum427718 scans: 8217
3	Garb_33533	SIEVEANPSSGSIVK	File6005 Spectrum450582 scans: 8213
3	Garb_33533	SIEVEANPSSGSIVK	File6005 Spectrum450613 scans: 8246
3	Garb_33533	SIEVEANPSSGSIVK	File5988 Spectrum52246 scans: 8739
3	Garb_33533	SIEVEANPSSGSIVK	File6005 Spectrum451185 scans: 8856
3	Garb_33533	SIEVEANPSSGSIVK	File6004 Spectrum427675 scans: 8171
3	Garb_33533	SIEVEANPSSGSIVK	File5988 Spectrum52103 scans: 8587
3	Garb_33533	SIEVEANPSSGSIVK	File6004 Spectrum427998 scans: 8516
3	Garb_33533	SIEVEANPSSGSIVK	File6004 Spectrum427799 scans: 8303
3	Garb_33533	SIEVEANPSSGSIVK	File6004 Spectrum427810 scans: 8315
3	Garb_33533	SIEVEANPSSGSIVK	File5989 Spectrum75644 scans: 8794
3	Garb_33533	SIEVEANPSSGSIVK	File5987 Spectrum28984 scans: 8661
3	Garb_33533	SIEVEANPSSGSIVK	File6004 Spectrum427826 scans: 8332
3	Garb_33533	SIEVEANPSSGSIVK	File6004 Spectrum427829 scans: 8335
3	Garb_33533	SIEVEANPSSGSIVK	File6005 Spectrum450899 scans: 8551
3	Garb_33533	SIEVEANPSSGSIVK	File5988 Spectrum52010 scans: 8487
3	Garb_33533	SIEVEANPSSGSIVK	File6004 Spectrum427750 scans: 8251
3	Garb_33533	SIEVEANPSSGSIVK	File6004 Spectrum428237 scans: 8771
3	Garb_33533	SIEVEANPSSGSIVK	File6004 Spectrum427890 scans: 8400
3	Garb_33533	SIEVEANPSSGSIVK	File6004 Spectrum427853 scans: 8361
3	Garb_33533	SIEVEANPSSGSIVK	File6004 Spectrum427780 scans: 8283
3	Garb_33533	SIEVEANPSSGSIVK	File6005 Spectrum450717 scans: 8357
3	Garb_33533	SIEVEANPSSGSIVK	File6004 Spectrum427683 scans: 8180
3	Garb_33533	SIEVEANPSSGSIVK	File6004 Spectrum428132 scans: 8659
3	Garb_33533	SIEVEANPSSGSIVK	File6004 Spectrum427969 scans: 8485
3	Garb_33533	GVFSYDYETTSPVAPAR	File6000 Spectrum339111 scans: 11222
3	Garb_33533	GVFSYDYETTSPVAPAR	File6000 Spectrum339200 scans: 11317
3	Garb_33533	GVFSYDYETTSPVAPAR	File6001 Spectrum362006 scans: 11445
3	Garb_33533	GVFSYDYETTSPVAPAR	File6000 Spectrum338799 scans: 10889
3	Garb_33533	GVFSYDYETTSPVAPAR	File6000 Spectrum339065 scans: 11173
3	Garb_33533	GVFSYDYETTSPVAPAR	File6000 Spectrum338930 scans: 11029
3	Garb_33533	INFVEGFPFQYMK	File5987 Spectrum37489 scans: 17733
3	Garb_33533	INFVEGFPFQYMK	File5987 Spectrum37475 scans: 17718
3	Garb_33533	INFVEGFPFQYMK	File5987 Spectrum35896 scans: 16033
3	Garb_33533	INFVEGFPFQYMK	File5987 Spectrum35887 scans: 16024
3	Garb_33533	FYTVGDNVITEDEIK	File5992 Spectrum150307 scans: 10788
3	Garb_33533	FYTVGDNVITEDEIK	File5993 Spectrum174121 scans: 11196
3	Garb_33533	FYTVGDNVITEDEIK	File6005 Spectrum455230 scans: 13170
3	Garb_33533	FYTVGDNVITEDEIK	File5992 Spectrum150368 scans: 10853
3	Garb_33533	FYTVGDNVITEDEIK	File6004 Spectrum432690 scans: 13520
3	Garb_33533	FYTVGDNVITEDEIK	File6003 Spectrum410130 scans: 13884
3	Garb_33533	FYTVGDNVITEDEIK	File6002 Spectrum386799 scans: 13383
3	Garb_33533	FYTVGDNVITEDEIK	File5992 Spectrum150432 scans: 10922
3	Garb_33533	FYTVGDNVITEDEIK	File6004 Spectrum432828 scans: 13668
3	Garb_33533	FYTVGDNVITEDEIK	File6004 Spectrum432814 scans: 13653
3	Garb_33533	FYTVGDNVITEDEIK	File6002 Spectrum386813 scans: 13398
3	Garb_33533	FYTVGDNVITEDEIK	File5987 Spectrum33367 scans: 13336
3	Garb_33533	FYTVGDNVITEDEIK	File6003 Spectrum409957 scans: 13699
3	Garb_33533	FYTVGDNVITEDEIK	File6003 Spectrum409915 scans: 13655
3	Garb_33533	FYTVGDNVITEDEIK	File6004 Spectrum432705 scans: 13536
3	Garb_33533	FYTVGDNVITEDEIK	File6003 Spectrum409870 scans: 13607
3	Garb_33533	FYTVGDNVITEDEIK	File6002 Spectrum386728 scans: 13308
3	Garb_33533	FYTVGDNVITEDEIK	File6002 Spectrum386264 scans: 12813
3	Garb_33533	FYTVGDNVITEDEIK	File6003 Spectrum409635 scans: 13356
3	Garb_33533	FYTVGDNVITEDEIK	File6003 Spectrum409675 scans: 13399
3	Garb_33533	FYTVGDNVITEDEIK	File6003 Spectrum409687 scans: 13411
3	Garb_33533	FYTVGDNVITEDEIK	File6003 Spectrum409809 scans: 13542
3	Garb_33533	FYTVGDNVITEDEIK	File6003 Spectrum410062 scans: 13811
3	Garb_33533	FYTVGDNVITEDEIK	File5992 Spectrum150476 scans: 10969
3	Garb_33533	FYTVGDNVITEDEIK	File5992 Spectrum150344 scans: 10828
3	Garb_33533	FYTVGDNVITEDEIK	File6002 Spectrum386278 scans: 12828
3	Garb_33533	FYTVGDNVITEDEIK	File6003 Spectrum409316 scans: 13016
3	Garb_33533	FYTVGDNVITEDEIK	File6003 Spectrum409736 scans: 13464
3	Garb_33533	GVFSYDYETTSPVAPAR	File5994 Spectrum196969 scans: 10482
3	Garb_33533	GVFSYDYETTSPVAPAR	File5993 Spectrum173431 scans: 10460
3	Garb_33533	GVFSYDYETTSPVAPAR	File5993 Spectrum173395 scans: 10421
3	Garb_33533	GVFSYDYETTSPVAPAR	File5993 Spectrum173305 scans: 10325
3	Garb_33533	GVFSYDYETTSPVAPAR	File5993 Spectrum173333 scans: 10355
3	Garb_33533	GVFSYDYETTSPVAPAR	File5993 Spectrum173338 scans: 10360
4	cotton_GLEAN_10004348	AFTIEAAK	File5989 Spectrum75937 scans: 9107
4	cotton_GLEAN_10004348	AFTIEAAK	File5989 Spectrum75978 scans: 9151
4	cotton_GLEAN_10004348	AFTIEAAK	File5989 Spectrum75990 scans: 9163
4	cotton_GLEAN_10004348	VWPTAAPNTVK	File5990 Spectrum100141 scans: 9576
4	cotton_GLEAN_10004348	VWPTAAPNTVK	File5990 Spectrum100147 scans: 9583
4	cotton_GLEAN_10004348	VWPTAAPNTVK	File5989 Spectrum76533 scans: 9743
4	cotton_GLEAN_10004348	SVEVEANPSSGSIVK	File6004 Spectrum426901 scans: 7345
4	cotton_GLEAN_10004348	SVEVEANPSSGSIVK	File5987 Spectrum27971 scans: 7580
4	cotton_GLEAN_10004348	SVEVEANPSSGSIVK	File6005 Spectrum449655 scans: 7224
4	cotton_GLEAN_10004348	SVEVEANPSSGSIVK	File6005 Spectrum449797 scans: 7375
4	cotton_GLEAN_10004348	SVEVEANPSSGSIVK	File6004 Spectrum426924 scans: 7370
4	cotton_GLEAN_10004348	SVEVEANPSSGSIVK	File6005 Spectrum449812 scans: 7391
4	cotton_GLEAN_10004348	SVEVEANPSSGSIVK	File6004 Spectrum426972 scans: 7421
4	cotton_GLEAN_10004348	SVEVEANPSSGSIVK	File6005 Spectrum449670 scans: 7240
4	cotton_GLEAN_10004348	SVEVEANPSSGSIVK	File6005 Spectrum449937 scans: 7525
4	cotton_GLEAN_10004348	GVFTYDYESTSPVAPVR	File6000 Spectrum339652 scans: 11799
4	cotton_GLEAN_10004348	GVFTYDYESTSPVAPVR	File6001 Spectrum362672 scans: 12155
4	cotton_GLEAN_10004348	GVFTYDYESTSPVAPVR	File6000 Spectrum339516 scans: 11654
4	cotton_GLEAN_10004348	GVFTYDYESTSPVAPVR	File6000 Spectrum339620 scans: 11765
4	cotton_GLEAN_10004348	GVFTYDYESTSPVAPVR	File6001 Spectrum362659 scans: 12141
4	cotton_GLEAN_10004348	GVFTYDYESTSPVAPVR	File6000 Spectrum339490 scans: 11626
4	cotton_GLEAN_10004348	GVFTYDYESTSPVAPVR	File6000 Spectrum339755 scans: 11909
4	cotton_GLEAN_10004348	INFVEGLPFQYMK	File5989 Spectrum83790 scans: 17483
4	cotton_GLEAN_10004348	INFVEGLPFQYMK	File5989 Spectrum83849 scans: 17546
4	cotton_GLEAN_10004348	INFVEGLPFQYMK	File5989 Spectrum83850 scans: 17547
4	cotton_GLEAN_10004348	INFVEGLPFQYMK	File5989 Spectrum83802 scans: 17496
4	cotton_GLEAN_10004348	INFVEGLPFQYMK	File5987 Spectrum37112 scans: 17330
4	cotton_GLEAN_10004348	INFVEGLPFQYMK	File5987 Spectrum37146 scans: 17367
4	cotton_GLEAN_10004348	INFVEGLPFQYMK	File5988 Spectrum60700 scans: 17757
4	cotton_GLEAN_10004348	INFVEGLPFQYMK	File6005 Spectrum459214 scans: 17420
4	cotton_GLEAN_10004348	INFVEGLPFQYMK	File5987 Spectrum37206 scans: 17431
4	cotton_GLEAN_10004348	INFVEGLPFQYMK	File5987 Spectrum37093 scans: 17310
4	cotton_GLEAN_10004348	INFVEGLPFQYMK	File5987 Spectrum37016 scans: 17228
4	cotton_GLEAN_10004348	INFVEGLPFQYMK	File5989 Spectrum83601 scans: 17282
4	cotton_GLEAN_10004348	INFVEGLPFQYMK	File5987 Spectrum37159 scans: 17381
4	cotton_GLEAN_10004348	INFVEGLPFQYMK	File6005 Spectrum459223 scans: 17430
4	cotton_GLEAN_10004348	INFVEGLPFQYMK	File5987 Spectrum37083 scans: 17299
4	cotton_GLEAN_10004348	INFVEGLPFQYMK	File5987 Spectrum37221 scans: 17447
4	cotton_GLEAN_10004348	INFVEGLPFQYMK	File5987 Spectrum37296 scans: 17527
4	cotton_GLEAN_10004348	INFVEGLPFQYMK	File5987 Spectrum37280 scans: 17510
4	cotton_GLEAN_10004348	INFVEGLPFQYMK	File6005 Spectrum459362 scans: 17578
4	cotton_GLEAN_10004348	INFVEGLPFQYMK	File5988 Spectrum60598 scans: 17648
4	cotton_GLEAN_10004348	INFVEGLPFQYMK	File6005 Spectrum459239 scans: 17447
4	cotton_GLEAN_10004348	INFVEGLPFQYMK	File5987 Spectrum37027 scans: 17240
4	cotton_GLEAN_10004348	INFVEGLPFQYMK	File5988 Spectrum60729 scans: 17788
4	cotton_GLEAN_10004348	INFVEGLPFQYMK	File5987 Spectrum37272 scans: 17501
4	cotton_GLEAN_10004348	INFVEGLPFQYMK	File6005 Spectrum459376 scans: 17593
4	cotton_GLEAN_10004348	INFVEGLPFQYMK	File6005 Spectrum457619 scans: 15719
4	cotton_GLEAN_10004348	INFVEGLPFQYMK	File5987 Spectrum35637 scans: 15757
4	cotton_GLEAN_10004348	INFVEGLPFQYMK	File5988 Spectrum59079 scans: 16028
4	cotton_GLEAN_10004348	INFVEGLPFQYMK	File5988 Spectrum58975 scans: 15917
4	cotton_GLEAN_10004348	INFVEGLPFQYMK	File5987 Spectrum35794 scans: 15925
4	cotton_GLEAN_10004348	INFVEGLPFQYMK	File5988 Spectrum59107 scans: 16058
4	cotton_GLEAN_10004348	INFVEGLPFQYMK	File5987 Spectrum35671 scans: 15793
4	cotton_GLEAN_10004348	INFVEGLPFQYMK	File5987 Spectrum35766 scans: 15895
4	cotton_GLEAN_10004348	INFVEGLPFQYMK	File6005 Spectrum457536 scans: 15630
4	cotton_GLEAN_10004348	FYTVGDNVITEDEIK	File5992 Spectrum150307 scans: 10788
4	cotton_GLEAN_10004348	FYTVGDNVITEDEIK	File5993 Spectrum174121 scans: 11196
4	cotton_GLEAN_10004348	FYTVGDNVITEDEIK	File6005 Spectrum455230 scans: 13170
4	cotton_GLEAN_10004348	FYTVGDNVITEDEIK	File5992 Spectrum150368 scans: 10853
4	cotton_GLEAN_10004348	FYTVGDNVITEDEIK	File6004 Spectrum432690 scans: 13520
4	cotton_GLEAN_10004348	FYTVGDNVITEDEIK	File6003 Spectrum410130 scans: 13884
4	cotton_GLEAN_10004348	FYTVGDNVITEDEIK	File6002 Spectrum386799 scans: 13383
4	cotton_GLEAN_10004348	FYTVGDNVITEDEIK	File5992 Spectrum150432 scans: 10922
4	cotton_GLEAN_10004348	FYTVGDNVITEDEIK	File6004 Spectrum432828 scans: 13668
4	cotton_GLEAN_10004348	FYTVGDNVITEDEIK	File6004 Spectrum432814 scans: 13653
4	cotton_GLEAN_10004348	FYTVGDNVITEDEIK	File6002 Spectrum386813 scans: 13398
4	cotton_GLEAN_10004348	FYTVGDNVITEDEIK	File5987 Spectrum33367 scans: 13336
4	cotton_GLEAN_10004348	FYTVGDNVITEDEIK	File6003 Spectrum409957 scans: 13699
4	cotton_GLEAN_10004348	FYTVGDNVITEDEIK	File6003 Spectrum409915 scans: 13655
4	cotton_GLEAN_10004348	FYTVGDNVITEDEIK	File6004 Spectrum432705 scans: 13536
4	cotton_GLEAN_10004348	FYTVGDNVITEDEIK	File6003 Spectrum409870 scans: 13607
4	cotton_GLEAN_10004348	FYTVGDNVITEDEIK	File6002 Spectrum386728 scans: 13308
4	cotton_GLEAN_10004348	FYTVGDNVITEDEIK	File6002 Spectrum386264 scans: 12813
4	cotton_GLEAN_10004348	FYTVGDNVITEDEIK	File6003 Spectrum409635 scans: 13356
4	cotton_GLEAN_10004348	FYTVGDNVITEDEIK	File6003 Spectrum409675 scans: 13399
4	cotton_GLEAN_10004348	FYTVGDNVITEDEIK	File6003 Spectrum409687 scans: 13411
4	cotton_GLEAN_10004348	FYTVGDNVITEDEIK	File6003 Spectrum409809 scans: 13542
4	cotton_GLEAN_10004348	FYTVGDNVITEDEIK	File6003 Spectrum410062 scans: 13811
4	cotton_GLEAN_10004348	FYTVGDNVITEDEIK	File5992 Spectrum150476 scans: 10969
4	cotton_GLEAN_10004348	FYTVGDNVITEDEIK	File5992 Spectrum150344 scans: 10828
4	cotton_GLEAN_10004348	FYTVGDNVITEDEIK	File6002 Spectrum386278 scans: 12828
4	cotton_GLEAN_10004348	FYTVGDNVITEDEIK	File6003 Spectrum409316 scans: 13016
4	cotton_GLEAN_10004348	FYTVGDNVITEDEIK	File6003 Spectrum409736 scans: 13464
4	cotton_GLEAN_10004348	GVFTYDYESTSPVAPVR	File5993 Spectrum174008 scans: 11075
4	cotton_GLEAN_10004348	GVFTYDYESTSPVAPVR	File5992 Spectrum150327 scans: 10810
4	cotton_GLEAN_10004348	GVFTYDYESTSPVAPVR	File5993 Spectrum174083 scans: 11155
4	cotton_GLEAN_10004348	GVFTYDYESTSPVAPVR	File5992 Spectrum150239 scans: 10716
4	cotton_GLEAN_10004348	INFVEGLPFQYMK	File5998 Spectrum298064 scans: 16511
5	Garb_28798	LFGVTTLDVVR	File6001 Spectrum365961 scans: 15663
5	Garb_28798	ANLPEEDIK	File5988 Spectrum51039 scans: 7452
5	Garb_28798	ANLPEEDIK	File5989 Spectrum74382 scans: 7448
5	Garb_28798	ANLPEEDIK	File5988 Spectrum50912 scans: 7316
5	Garb_28798	ANLPEEDIK	File5988 Spectrum50906 scans: 7310
5	Garb_28798	DDLFNINAGIVK	File5988 Spectrum56609 scans: 13393
5	Garb_28798	DDLFNINAGIVK	File6004 Spectrum432682 scans: 13512
5	Garb_28798	DDLFNINAGIVK	File6005 Spectrum455543 scans: 13504
5	Garb_28798	DDLFNINAGIVK	File5987 Spectrum33829 scans: 13829
5	Garb_28798	DDLFNINAGIVK	File6005 Spectrum455726 scans: 13699
5	Garb_28798	DDLFNINAGIVK	File6005 Spectrum455577 scans: 13541
5	Garb_28798	DDLFNINAGIVK	File6005 Spectrum455455 scans: 13410
5	Garb_28798	DDLFNINAGIVK	File6005 Spectrum455445 scans: 13400
5	Garb_28798	DDLFNINAGIVK	File5987 Spectrum33698 scans: 13689
5	Garb_28798	ALEGCDVVIIPAGVPR	File6001 Spectrum364167 scans: 13750
5	Garb_28798	SEVAGYVGEEQLGK	File6004 Spectrum428399 scans: 8943
5	Garb_28798	SEVAGYVGEEQLGK	File6004 Spectrum428823 scans: 9396
5	Garb_28798	SEVAGYVGEEQLGK	File6005 Spectrum451513 scans: 9206
5	Garb_28798	SEVAGYVGEEQLGK	File6004 Spectrum428554 scans: 9109
5	Garb_28798	SEVAGYVGEEQLGK	File6005 Spectrum451294 scans: 8972
5	Garb_28798	SEVAGYVGEEQLGK	File6005 Spectrum451361 scans: 9043
5	Garb_28798	SEVAGYVGEEQLGK	File6005 Spectrum451647 scans: 9349
5	Garb_28798	SEVAGYVGEEQLGK	File6004 Spectrum428408 scans: 8953
5	Garb_28798	SEVAGYVGEEQLGK	File6005 Spectrum451558 scans: 9254
5	Garb_28798	SEVAGYVGEEQLGK	File6005 Spectrum451559 scans: 9255
5	Garb_28798	SEVAGYVGEEQLGK	File6005 Spectrum451380 scans: 9064
5	Garb_28798	SEVAGYVGEEQLGK	File6005 Spectrum451423 scans: 9110
5	Garb_28798	SEVAGYVGEEQLGK	File6004 Spectrum428538 scans: 9092
5	Garb_28798	VAVLGAAGGIGQPLALLMK	File5990 Spectrum108576 scans: 18574
5	Garb_28798	VAVLGAAGGIGQPLALLMK	File5988 Spectrum61603 scans: 18720
5	Garb_28798	VAVLGAAGGIGQPLALLMK	File5987 Spectrum38120 scans: 18406
5	Garb_28798	VAVLGAAGGIGQPLALLMK	File5987 Spectrum38067 scans: 18349
5	Garb_28798	VAVLGAAGGIGQPLALLMK	File5987 Spectrum37989 scans: 18266
5	Garb_28798	VAVLGAAGGIGQPLALLMK	File5988 Spectrum61598 scans: 18715
5	Garb_28798	VAVLGAAGGIGQPLALLMK	File5988 Spectrum61587 scans: 18703
5	Garb_28798	VAVLGAAGGIGQPLALLMK	File5987 Spectrum38141 scans: 18428
5	Garb_28798	VAVLGAAGGIGQPLALLMK	File5987 Spectrum36908 scans: 17113
5	Garb_28798	VAVLGAAGGIGQPLALLMK	File5987 Spectrum36931 scans: 17137
5	Garb_28798	VAVLGAAGGIGQPLALLMK	File5987 Spectrum36928 scans: 17134
5	Garb_28798	VAVLGAAGGIGQPLALLMK	File5988 Spectrum60357 scans: 17391
5	Garb_28798	VAVLGAAGGIGQPLALLMK	File5988 Spectrum60230 scans: 17255
5	Garb_28798	VAVLGAAGGIGQPLALLMK	File5987 Spectrum37042 scans: 17256
5	Garb_28798	VAVLGAAGGIGQPLALLMK	File5989 Spectrum83841 scans: 17538
5	Garb_28798	VAVLGAAGGIGQPLALLMK	File5988 Spectrum60256 scans: 17283
5	Garb_28798	VAVLGAAGGIGQPLALLMK	File5987 Spectrum36927 scans: 17133
5	Garb_28798	NGVEEVLGLGPLSEYEK	File6004 Spectrum434372 scans: 15315
5	Garb_28798	NGVEEVLGLGPLSEYEK	File6004 Spectrum434270 scans: 15206
5	Garb_28798	LNPLVSQLALYDIANTPGVAADVSHINSR	File6004 Spectrum436567 scans: 17656
5	Garb_28798	LNPLVSQLALYDIANTPGVAADVSHINSR	File6005 Spectrum459450 scans: 17672
5	Garb_28798	LNPLVSQLALYDIANTPGVAADVSHINSR	File6004 Spectrum436588 scans: 17678
5	Garb_28798	LNPLVSQLALYDIANTPGVAADVSHINSR	File6004 Spectrum436910 scans: 18022
5	Garb_28798	LNPLVSQLALYDIANTPGVAADVSHINSR	File6005 Spectrum459634 scans: 17868
5	Garb_28798	VNVADVNVPVVGGHAGITILPLFSQATPK	File5991 Spectrum133143 scans: 18915
5	Garb_28798	VNVADVNVPVVGGHAGITILPLFSQATPK	File5990 Spectrum107818 scans: 17765
5	Garb_28798	VNVADVNVPVVGGHAGITILPLFSQATPK	File5990 Spectrum107805 scans: 17751
5	Garb_28798	VNVADVNVPVVGGHAGITILPLFSQATPK	File5990 Spectrum107792 scans: 17737
5	Garb_28798	VNVADVNVPVVGGHAGITILPLFSQATPK	File5990 Spectrum107809 scans: 17756
5	Garb_28798	VNVADVNVPVVGGHAGITILPLFSQATPK	File5990 Spectrum107791 scans: 17736
5	Garb_28798	LNPLVSQLALYDIANTPGVAADVSHINSR	File5995 Spectrum227572 scans: 17645
6	cotton_GLEAN_10013920	AFVLEAAK	File5990 Spectrum101584 scans: 11116
6	cotton_GLEAN_10013920	AFVLEAAK	File5989 Spectrum77721 scans: 11010
6	cotton_GLEAN_10013920	AFVLEAAK	File5989 Spectrum77866 scans: 11165
6	cotton_GLEAN_10013920	AFVLEAAK	File5990 Spectrum101719 scans: 11260
6	cotton_GLEAN_10013920	VWPTAAPHAVK	File5996 Spectrum243847 scans: 8787
6	cotton_GLEAN_10013920	SVELEGDASPGSIVK	File5988 Spectrum52623 scans: 9141
6	cotton_GLEAN_10013920	SVELEGDASPGSIVK	File6005 Spectrum451662 scans: 9365
6	cotton_GLEAN_10013920	SVELEGDASPGSIVK	File6005 Spectrum451346 scans: 9027
6	cotton_GLEAN_10013920	SVELEGDASPGSIVK	File5987 Spectrum29715 scans: 9440
6	cotton_GLEAN_10013920	SVELEGDASPGSIVK	File6004 Spectrum428642 scans: 9203
6	cotton_GLEAN_10013920	SVELEGDASPGSIVK	File6004 Spectrum428566 scans: 9121
6	cotton_GLEAN_10013920	SVELEGDASPGSIVK	File6005 Spectrum451663 scans: 9366
6	cotton_GLEAN_10013920	SVELEGDASPGSIVK	File6005 Spectrum451528 scans: 9222
6	cotton_GLEAN_10013920	SVELEGDASPGSIVK	File6005 Spectrum451394 scans: 9079
6	cotton_GLEAN_10013920	SVELEGDASPGSIVK	File6005 Spectrum451527 scans: 9221
6	cotton_GLEAN_10013920	SVELEGDASPGSIVK	File5987 Spectrum29719 scans: 9445
6	cotton_GLEAN_10013920	SVELEGDASPGSIVK	File6005 Spectrum451262 scans: 8938
6	cotton_GLEAN_10013920	SVELEGDASPGSIVK	File6005 Spectrum451393 scans: 9078
6	cotton_GLEAN_10013920	SVELEGDASPGSIVK	File6005 Spectrum450991 scans: 8649
6	cotton_GLEAN_10013920	GVVSYEFEVTSPIAPAR	File6000 Spectrum341105 scans: 13349
6	cotton_GLEAN_10013920	GVVSYEFEVTSPIAPAR	File6001 Spectrum364081 scans: 13658
6	cotton_GLEAN_10013920	GVVSYEFEVTSPIAPAR	File6000 Spectrum340833 scans: 13058
6	cotton_GLEAN_10013920	GVVSYEFEVTSPIAPAR	File6003 Spectrum409437 scans: 13145
6	cotton_GLEAN_10013920	GVVSYEFEVTSPIAPAR	File6000 Spectrum340824 scans: 13049
6	cotton_GLEAN_10013920	GVVSYEFEVTSPIAPAR	File6000 Spectrum340848 scans: 13074
6	cotton_GLEAN_10013920	GVVSYEFEVTSPIAPAR	File6000 Spectrum340847 scans: 13073
6	cotton_GLEAN_10013920	GVVSYEFEVTSPIAPAR	File6000 Spectrum340956 scans: 13190
6	cotton_GLEAN_10013920	GVVSYEFEVTSPIAPAR	File6000 Spectrum340852 scans: 13079
6	cotton_GLEAN_10013920	GVVSYEFEVTSPIAPAR	File6000 Spectrum340553 scans: 12760
6	cotton_GLEAN_10013920	GVVSYEFEVTSPIAPAR	File6002 Spectrum386657 scans: 13232
6	cotton_GLEAN_10013920	GVVSYEFEVTSPIAPAR	File6000 Spectrum340952 scans: 13185
6	cotton_GLEAN_10013920	GVVSYEFEVTSPIAPAR	File6000 Spectrum340949 scans: 13182
6	cotton_GLEAN_10013920	GVVSYEFEVTSPIAPAR	File6000 Spectrum341318 scans: 13576
6	cotton_GLEAN_10013920	GVVSYEFEVTSPIAPAR	File6000 Spectrum340924 scans: 13155
6	cotton_GLEAN_10013920	GVVSYEFEVTSPIAPAR	File6001 Spectrum364148 scans: 13730
6	cotton_GLEAN_10013920	GVVSYEFEVTSPIAPAR	File6000 Spectrum340927 scans: 13159
6	cotton_GLEAN_10013920	GVVSYEFEVTSPIAPAR	File6001 Spectrum364021 scans: 13594
6	cotton_GLEAN_10013920	ITFVEGLPYQYMK	File5988 Spectrum59252 scans: 16212
6	cotton_GLEAN_10013920	ITFVEGLPYQYMK	File5988 Spectrum59320 scans: 16285
6	cotton_GLEAN_10013920	ITFVEGLPYQYMK	File5987 Spectrum36000 scans: 16144
6	cotton_GLEAN_10013920	ITFVEGLPYQYMK	File6005 Spectrum457821 scans: 15934
6	cotton_GLEAN_10013920	ITFVEGLPYQYMK	File6005 Spectrum457948 scans: 16070
6	cotton_GLEAN_10013920	ITFVEGLPYQYMK	File6004 Spectrum435152 scans: 16147
6	cotton_GLEAN_10013920	ITFVEGLPYQYMK	File6004 Spectrum435106 scans: 16097
6	cotton_GLEAN_10013920	ITFVEGLPYQYMK	File6004 Spectrum435027 scans: 16013
6	cotton_GLEAN_10013920	ITFVEGLPYQYMK	File6005 Spectrum457845 scans: 15960
6	cotton_GLEAN_10013920	ITFVEGLPYQYMK	File6004 Spectrum433672 scans: 14568
6	cotton_GLEAN_10013920	ITFVEGLPYQYMK	File6005 Spectrum456688 scans: 14726
6	cotton_GLEAN_10013920	ITFVEGLPYQYMK	File6005 Spectrum456551 scans: 14579
6	cotton_GLEAN_10013920	ITFVEGLPYQYMK	File6004 Spectrum433804 scans: 14709
6	cotton_GLEAN_10013920	ITFVEGLPYQYMK	File6005 Spectrum456595 scans: 14626
6	cotton_GLEAN_10013920	GVVSYEFEVTSPIAPAR	File5993 Spectrum175364 scans: 12521
6	cotton_GLEAN_10013920	GVVSYEFEVTSPIAPAR	File5993 Spectrum175287 scans: 12439
6	cotton_GLEAN_10013920	GVVSYEFEVTSPIAPAR	File5992 Spectrum151706 scans: 12281
6	cotton_GLEAN_10013920	GVVSYEFEVTSPIAPAR	File5993 Spectrum175347 scans: 12503
6	cotton_GLEAN_10013920	GVVSYEFEVTSPIAPAR	File5993 Spectrum175321 scans: 12476
6	cotton_GLEAN_10013920	GVVSYEFEVTSPIAPAR	File5993 Spectrum175336 scans: 12492
6	cotton_GLEAN_10013920	GVVSYEFEVTSPIAPAR	File5993 Spectrum175346 scans: 12502
6	cotton_GLEAN_10013920	GVVSYEFEVTSPIAPAR	File5993 Spectrum175206 scans: 12353
6	cotton_GLEAN_10013920	GVVSYEFEVTSPIAPAR	File5994 Spectrum198861 scans: 12500
6	cotton_GLEAN_10013920	ITFVEGLPYQYMK	File5996 Spectrum250355 scans: 15729
6	cotton_GLEAN_10013920	ITFVEGLPYQYMK	File5996 Spectrum250536 scans: 15922
6	cotton_GLEAN_10013920	ISYENQFVAAADGGSICK	File6004 Spectrum431519 scans: 12271
7	cotton_GLEAN_10009583	EGLELLK	File5988 Spectrum54031 scans: 10643
7	cotton_GLEAN_10009583	AAVPSGASTGIYEALELR	File6000 Spectrum341700 scans: 13983
7	cotton_GLEAN_10009583	AAVPSGASTGIYEALELR	File6000 Spectrum341812 scans: 14103
7	cotton_GLEAN_10009583	AAVPSGASTGIYEALELR	File6000 Spectrum341805 scans: 14095
7	cotton_GLEAN_10009583	AAVPSGASTGIYEALELR	File6001 Spectrum364858 scans: 14487
7	cotton_GLEAN_10009583	AAVPSGASTGIYEALELR	File6000 Spectrum341669 scans: 13950
7	cotton_GLEAN_10009583	VQIVGDDLLVTNPK	File5989 Spectrum80231 scans: 13687
7	cotton_GLEAN_10009583	VQIVGDDLLVTNPK	File6005 Spectrum455339 scans: 13287
7	cotton_GLEAN_10009583	VQIVGDDLLVTNPK	File6005 Spectrum455458 scans: 13414
7	cotton_GLEAN_10009583	VQIVGDDLLVTNPK	File6005 Spectrum455459 scans: 13415
7	cotton_GLEAN_10009583	VQIVGDDLLVTNPK	File6005 Spectrum455323 scans: 13270
7	cotton_GLEAN_10009583	VQIVGDDLLVTNPK	File5987 Spectrum33665 scans: 13654
7	cotton_GLEAN_10009583	VQIVGDDLLVTNPK	File6005 Spectrum455501 scans: 13459
7	cotton_GLEAN_10009583	VQIVGDDLLVTNPK	File6005 Spectrum455612 scans: 13578
7	cotton_GLEAN_10009583	VQIVGDDLLVTNPK	File6005 Spectrum455472 scans: 13429
7	cotton_GLEAN_10009583	VQIVGDDLLVTNPK	File5987 Spectrum33541 scans: 13521
7	cotton_GLEAN_10009583	IEEELGSDAIYAGASFR	File5999 Spectrum319881 scans: 14736
7	cotton_GLEAN_10009583	AVANVNTIIGPALIGK	File5988 Spectrum57971 scans: 14846
7	cotton_GLEAN_10009583	AVANVNTIIGPALIGK	File5989 Spectrum81932 scans: 15502
7	cotton_GLEAN_10009583	AVANVNTIIGPALIGK	File5988 Spectrum58237 scans: 15130
7	cotton_GLEAN_10009583	AVANVNTIIGPALIGK	File5988 Spectrum58238 scans: 15131
7	cotton_GLEAN_10009583	AVANVNTIIGPALIGK	File5988 Spectrum58102 scans: 14986
7	cotton_GLEAN_10009583	AVANVNTIIGPALIGK	File5988 Spectrum58105 scans: 14989
7	cotton_GLEAN_10009583	AVANVNTIIGPALIGK	File5988 Spectrum58236 scans: 15128
7	cotton_GLEAN_10009583	AVANVNTIIGPALIGK	File5989 Spectrum81808 scans: 15369
7	cotton_GLEAN_10009583	AVANVNTIIGPALIGK	File5988 Spectrum58090 scans: 14973
7	cotton_GLEAN_10009583	AVANVNTIIGPALIGK	File5989 Spectrum81900 scans: 15467
7	cotton_GLEAN_10009583	VNQIGSVTESIEAVK	File6005 Spectrum455054 scans: 12983
7	cotton_GLEAN_10009583	VNQIGSVTESIEAVK	File5987 Spectrum33134 scans: 13087
7	cotton_GLEAN_10009583	VNQIGSVTESIEAVK	File6005 Spectrum455188 scans: 13126
7	cotton_GLEAN_10009583	VNQIGSVTESIEAVK	File6005 Spectrum455026 scans: 12953
7	cotton_GLEAN_10009583	VNQIGSVTESIEAVK	File5987 Spectrum33142 scans: 13096
7	cotton_GLEAN_10009583	VNQIGSVTESIEAVK	File6005 Spectrum455158 scans: 13094
7	cotton_GLEAN_10009583	AAVPSGASTGIYEALELR	File5993 Spectrum176187 scans: 13399
7	cotton_GLEAN_10009583	VVIGMDVAASEFYGSADK	File6003 Spectrum412256 scans: 16152
7	cotton_GLEAN_10009583	VVIGMDVAASEFYGSADK	File6003 Spectrum412248 scans: 16143
7	cotton_GLEAN_10009583	SGETEDTFIADLSVGLATGQIK	File6003 Spectrum413586 scans: 17570
7	cotton_GLEAN_10009583	SGETEDTFIADLSVGLATGQIK	File6002 Spectrum390667 scans: 17509
7	cotton_GLEAN_10009583	SGETEDTFIADLSVGLATGQIK	File6002 Spectrum390533 scans: 17366
7	cotton_GLEAN_10009583	YGQDATNVGDEGGFAPNIQENK	File6004 Spectrum428629 scans: 9189
7	cotton_GLEAN_10009583	YGQDATNVGDEGGFAPNIQENK	File6003 Spectrum405742 scans: 9203
7	cotton_GLEAN_10009583	YGQDATNVGDEGGFAPNIQENK	File6003 Spectrum405723 scans: 9183
7	cotton_GLEAN_10009583	YGQDATNVGDEGGFAPNIQENK	File6003 Spectrum405890 scans: 9361
7	cotton_GLEAN_10009583	YGQDATNVGDEGGFAPNIQENK	File6002 Spectrum382948 scans: 9276
7	cotton_GLEAN_10009583	YGQDATNVGDEGGFAPNIQENK	File5996 Spectrum244670 scans: 9665
7	cotton_GLEAN_10009583	KYGQDATNVGDEGGFAPNIQENK	File5996 Spectrum244264 scans: 9232
8	Garb_01398	SGDVYIPR	File6002 Spectrum380538 scans: 6705
8	Garb_01398	SGDVYIPR	File6002 Spectrum380396 scans: 6554
8	Garb_01398	LNEDLTAGFR	File6002 Spectrum384767 scans: 11216
8	Garb_01398	TVISQALSK	File5989 Spectrum76909 scans: 10144
8	Garb_01398	LAADTPLLTGQR	File6003 Spectrum407453 scans: 11029
8	Garb_01398	LAADTPLLTGQR	File6002 Spectrum384746 scans: 11194
8	Garb_01398	LAADTPLLTGQR	File6002 Spectrum384666 scans: 11108
8	Garb_01398	LAADTPLLTGQR	File6002 Spectrum384619 scans: 11058
8	Garb_01398	VGHDNLIGEIIR	File5991 Spectrum128382 scans: 13836
8	Garb_01398	LTTFEDSEK	File5987 Spectrum29592 scans: 9309
8	Garb_01398	QFTMLQTWPVR	File6003 Spectrum410678 scans: 14469
8	Garb_01398	DALWDFQPK	File5988 Spectrum56009 scans: 12753
8	Garb_01398	TTLVANTSNMPVAAR	File6001 Spectrum359683 scans: 8967
8	Garb_01398	TTLVANTSNMPVAAR	File6002 Spectrum382335 scans: 8622
8	Garb_01398	TTLVANTSNMPVAAR	File6001 Spectrum359813 scans: 9106
8	Garb_01398	TTLVANTSNMPVAAR	File6001 Spectrum357653 scans: 6802
8	Garb_01398	TTLVANTSNMPVAAR	File6002 Spectrum380229 scans: 6375
8	Garb_01398	YSGALESFYDK	File6005 Spectrum454216 scans: 12089
8	Garb_01398	DMGYNVSMMADSTSR	File5999 Spectrum315271 scans: 9819
8	Garb_01398	DMGYNVSMMADSTSR	File6000 Spectrum337780 scans: 9802
8	Garb_01398	DMGYNVSMMADSTSR	File6000 Spectrum335952 scans: 7852
8	Garb_01398	DMGYNVSMMADSTSR	File6000 Spectrum335476 scans: 7344
8	Garb_01398	DMGYNVSMMADSTSR	File6000 Spectrum335959 scans: 7859
8	Garb_01398	DMGYNVSMMADSTSR	File6000 Spectrum335934 scans: 7833
8	Garb_01398	DMGYNVSMMADSTSR	File6000 Spectrum336277 scans: 8199
8	Garb_01398	DTVLELEFQGVK	File6005 Spectrum455667 scans: 13637
8	Garb_01398	DTVLELEFQGVK	File6005 Spectrum455680 scans: 13650
8	Garb_01398	DTVLELEFQGVK	File6004 Spectrum432958 scans: 13806
8	Garb_01398	DTVLELEFQGVK	File6004 Spectrum432967 scans: 13816
8	Garb_01398	DTVLELEFQGVK	File6005 Spectrum455790 scans: 13768
8	Garb_01398	DMGYNVSMMADSTSR	File6000 Spectrum334631 scans: 6443
8	Garb_01398	DMGYNVSMMADSTSR	File6000 Spectrum334685 scans: 6501
8	Garb_01398	DMGYNVSMMADSTSR	File6000 Spectrum333763 scans: 5517
8	Garb_01398	DMGYNVSMMADSTSR	File6000 Spectrum332121 scans: 3766
8	Garb_01398	EASIYTGITIAEYFR	File6000 Spectrum344453 scans: 16920
8	Garb_01398	ITYIAPPGQYSLK	File5988 Spectrum55796 scans: 12526
8	Garb_01398	ITYIAPPGQYSLK	File5987 Spectrum32628 scans: 12547
8	Garb_01398	EDDLNEIVQLVGK	File6003 Spectrum412131 scans: 16018
8	Garb_01398	EDDLNEIVQLVGK	File6003 Spectrum412272 scans: 16169
8	Garb_01398	EDDLNEIVQLVGK	File6003 Spectrum412136 scans: 16024
8	Garb_01398	LAEMPADSGYPAYLAAR	File6000 Spectrum340556 scans: 12763
8	Garb_01398	LAEMPADSGYPAYLAAR	File6000 Spectrum340640 scans: 12853
8	Garb_01398	LAEMPADSGYPAYLAAR	File6000 Spectrum340509 scans: 12713
8	Garb_01398	FEDPAEGEEALVAK	File6003 Spectrum407477 scans: 11054
8	Garb_01398	FEDPAEGEEALVAK	File6004 Spectrum430205 scans: 10870
8	Garb_01398	FEDPAEGEEALVAK	File6003 Spectrum407619 scans: 11206
8	Garb_01398	LAEMPADSGYPAYLAAR	File6000 Spectrum338534 scans: 10606
8	Garb_01398	LAEMPADSGYPAYLAAR	File6000 Spectrum338486 scans: 10555
8	Garb_01398	NIVHFNALANQAVEK	File5995 Spectrum221718 scans: 11401
8	Garb_01398	EDYLAQNAFTPYDK	File6003 Spectrum408106 scans: 11725
8	Garb_01398	EDYLAQNAFTPYDK	File6003 Spectrum408165 scans: 11788
8	Garb_01398	GNEMAEVLMDFPQLTMTLPDGR	File5999 Spectrum323707 scans: 18817
8	Garb_01398	KVSGPVVVADGMAGAAMYELVR	File5993 Spectrum179149 scans: 16559
8	Garb_01398	LEGDSATIQVYEETAGLMVNDPVLR	File5997 Spectrum275895 scans: 17503
8	Garb_01398	LEGDSATIQVYEETAGLMVNDPVLR	File5997 Spectrum275900 scans: 17509
8	Garb_01398	LEGDSATIQVYEETAGLMVNDPVLR	File5997 Spectrum273613 scans: 15069
9	cotton_GLEAN_10010706	SGDVYIPR	File6002 Spectrum380538 scans: 6705
9	cotton_GLEAN_10010706	SGDVYIPR	File6002 Spectrum380396 scans: 6554
9	cotton_GLEAN_10010706	ESEFGYVR	File6001 Spectrum358445 scans: 7646
9	cotton_GLEAN_10010706	ESEFGYVR	File6002 Spectrum381104 scans: 7309
9	cotton_GLEAN_10010706	LNEDLTAGFR	File6002 Spectrum384767 scans: 11216
9	cotton_GLEAN_10010706	TVISQALSK	File5989 Spectrum76909 scans: 10144
9	cotton_GLEAN_10010706	LAADTPLLTGQR	File6003 Spectrum407453 scans: 11029
9	cotton_GLEAN_10010706	LAADTPLLTGQR	File6002 Spectrum384746 scans: 11194
9	cotton_GLEAN_10010706	LAADTPLLTGQR	File6002 Spectrum384666 scans: 11108
9	cotton_GLEAN_10010706	LAADTPLLTGQR	File6002 Spectrum384619 scans: 11058
9	cotton_GLEAN_10010706	VGHDNLIGEIIR	File5991 Spectrum128382 scans: 13836
9	cotton_GLEAN_10010706	LTTFEDSEK	File5987 Spectrum29592 scans: 9309
9	cotton_GLEAN_10010706	QFTMLQTWPVR	File6003 Spectrum410678 scans: 14469
9	cotton_GLEAN_10010706	TTLVANTSNMPVAAR	File6001 Spectrum359683 scans: 8967
9	cotton_GLEAN_10010706	TTLVANTSNMPVAAR	File6002 Spectrum382335 scans: 8622
9	cotton_GLEAN_10010706	TTLVANTSNMPVAAR	File6001 Spectrum359813 scans: 9106
9	cotton_GLEAN_10010706	TTLVANTSNMPVAAR	File6001 Spectrum357653 scans: 6802
9	cotton_GLEAN_10010706	TTLVANTSNMPVAAR	File6002 Spectrum380229 scans: 6375
9	cotton_GLEAN_10010706	YSGALETFYEK	File6004 Spectrum431407 scans: 12152
9	cotton_GLEAN_10010706	DMGYNVSMMADSTSR	File5999 Spectrum315271 scans: 9819
9	cotton_GLEAN_10010706	DMGYNVSMMADSTSR	File6000 Spectrum337780 scans: 9802
9	cotton_GLEAN_10010706	DMGYNVSMMADSTSR	File6000 Spectrum335952 scans: 7852
9	cotton_GLEAN_10010706	DMGYNVSMMADSTSR	File6000 Spectrum335476 scans: 7344
9	cotton_GLEAN_10010706	DMGYNVSMMADSTSR	File6000 Spectrum335959 scans: 7859
9	cotton_GLEAN_10010706	DMGYNVSMMADSTSR	File6000 Spectrum335934 scans: 7833
9	cotton_GLEAN_10010706	DMGYNVSMMADSTSR	File6000 Spectrum336277 scans: 8199
9	cotton_GLEAN_10010706	DTVLELEFQGVK	File6005 Spectrum455667 scans: 13637
9	cotton_GLEAN_10010706	DTVLELEFQGVK	File6005 Spectrum455680 scans: 13650
9	cotton_GLEAN_10010706	DTVLELEFQGVK	File6004 Spectrum432958 scans: 13806
9	cotton_GLEAN_10010706	DTVLELEFQGVK	File6004 Spectrum432967 scans: 13816
9	cotton_GLEAN_10010706	DTVLELEFQGVK	File6005 Spectrum455790 scans: 13768
9	cotton_GLEAN_10010706	DMGYNVSMMADSTSR	File6000 Spectrum334631 scans: 6443
9	cotton_GLEAN_10010706	DMGYNVSMMADSTSR	File6000 Spectrum334685 scans: 6501
9	cotton_GLEAN_10010706	DMGYNVSMMADSTSR	File6000 Spectrum333763 scans: 5517
9	cotton_GLEAN_10010706	DMGYNVSMMADSTSR	File6000 Spectrum332121 scans: 3766
9	cotton_GLEAN_10010706	EASIYTGITIAEYFR	File6000 Spectrum344453 scans: 16920
9	cotton_GLEAN_10010706	ITYIAPPGQYSLK	File5988 Spectrum55796 scans: 12526
9	cotton_GLEAN_10010706	ITYIAPPGQYSLK	File5987 Spectrum32628 scans: 12547
9	cotton_GLEAN_10010706	EDDLNEIVQLVGK	File6003 Spectrum412131 scans: 16018
9	cotton_GLEAN_10010706	EDDLNEIVQLVGK	File6003 Spectrum412272 scans: 16169
9	cotton_GLEAN_10010706	EDDLNEIVQLVGK	File6003 Spectrum412136 scans: 16024
9	cotton_GLEAN_10010706	LAEMPADSGYPAYLAAR	File6000 Spectrum340556 scans: 12763
9	cotton_GLEAN_10010706	LAEMPADSGYPAYLAAR	File6000 Spectrum340640 scans: 12853
9	cotton_GLEAN_10010706	LAEMPADSGYPAYLAAR	File6000 Spectrum340509 scans: 12713
9	cotton_GLEAN_10010706	FEDPAEGEEALVAK	File6003 Spectrum407477 scans: 11054
9	cotton_GLEAN_10010706	FEDPAEGEEALVAK	File6004 Spectrum430205 scans: 10870
9	cotton_GLEAN_10010706	FEDPAEGEEALVAK	File6003 Spectrum407619 scans: 11206
9	cotton_GLEAN_10010706	LAEMPADSGYPAYLAAR	File6000 Spectrum338534 scans: 10606
9	cotton_GLEAN_10010706	LAEMPADSGYPAYLAAR	File6000 Spectrum338486 scans: 10555
9	cotton_GLEAN_10010706	NIVHFNALANQAVEK	File5995 Spectrum221718 scans: 11401
9	cotton_GLEAN_10010706	EDYLAQNAFTPYDK	File6003 Spectrum408106 scans: 11725
9	cotton_GLEAN_10010706	EDYLAQNAFTPYDK	File6003 Spectrum408165 scans: 11788
9	cotton_GLEAN_10010706	GNEMAEVLMDFPQLTMTLPDGR	File5999 Spectrum323707 scans: 18817
9	cotton_GLEAN_10010706	KVSGPVVVADGMAGAAMYELVR	File5993 Spectrum179149 scans: 16559
9	cotton_GLEAN_10010706	LEGDSATIQVYEETAGLMVNDPVLR	File5997 Spectrum275895 scans: 17503
9	cotton_GLEAN_10010706	LEGDSATIQVYEETAGLMVNDPVLR	File5997 Spectrum275900 scans: 17509
9	cotton_GLEAN_10010706	LEGDSATIQVYEETAGLMVNDPVLR	File5997 Spectrum273613 scans: 15069
10	Garb_28527	WVWEANR	File6004 Spectrum429929 scans: 10575
10	Garb_28527	QLVLQYK	File5992 Spectrum149279 scans: 9692
10	Garb_28527	QLVLQYK	File5989 Spectrum76772 scans: 9998
10	Garb_28527	QLVLQYK	File5989 Spectrum76622 scans: 9838
10	Garb_28527	QLVLQYK	File5990 Spectrum100533 scans: 9995
10	Garb_28527	QLVLQYK	File5990 Spectrum100399 scans: 9852
10	Garb_28527	QLVLQYK	File5990 Spectrum100256 scans: 9699
10	Garb_28527	QLVLQYK	File5991 Spectrum126136 scans: 11441
10	Garb_28527	QLVLQYK	File5992 Spectrum149684 scans: 10124
10	Garb_28527	VFTYYDK	File5991 Spectrum126773 scans: 12120
10	Garb_28527	VFTYYDK	File5990 Spectrum101043 scans: 10539
10	Garb_28527	VFTYYDK	File5987 Spectrum31264 scans: 11093
10	Garb_28527	VFTYYDK	File5988 Spectrum54013 scans: 10624
10	Garb_28527	VFTYYDK	File5988 Spectrum54293 scans: 10923
10	Garb_28527	VFTYYDK	File5987 Spectrum30994 scans: 10805
10	Garb_28527	VFTYYDK	File5987 Spectrum30868 scans: 10670
10	Garb_28527	DSIWGTECELPER	File6000 Spectrum338422 scans: 10487
10	Garb_28527	DSIWGTECELPER	File6000 Spectrum338380 scans: 10442
10	Garb_28527	VDSQAWEETFTLFSR	File6000 Spectrum344900 scans: 17397
10	Garb_28527	VDSQAWEETFTLFSR	File6000 Spectrum344791 scans: 17280
10	Garb_28527	VDSQAWEETFTLFSR	File6000 Spectrum344916 scans: 17414
10	Garb_28527	VDSQAWEETFTLFSR	File6000 Spectrum344883 scans: 17378
10	Garb_28527	VDSQAWEETFTLFSR	File6001 Spectrum367933 scans: 17767
10	Garb_28527	FVNDGEFGPFVVEYDANYR	File5997 Spectrum273850 scans: 15322
10	Garb_28527	FVNDGEFGPFVVEYDANYR	File6000 Spectrum343576 scans: 15984
10	Garb_28527	FVNDGEFGPFVVEYDANYR	File5999 Spectrum321080 scans: 16015
10	Garb_28527	FVNDGEFGPFVVEYDANYR	File5999 Spectrum320801 scans: 15717
10	Garb_28527	FVNDGEFGPFVVEYDANYR	File5999 Spectrum320938 scans: 15864
10	Garb_28527	FVNDGEFGPFVVEYDANYR	File5999 Spectrum321060 scans: 15994
10	Garb_28527	FVNDGEFGPFVVEYDANYR	File5999 Spectrum320922 scans: 15847
10	Garb_28527	FVNDGEFGPFVVEYDANYR	File6000 Spectrum343568 scans: 15976
10	Garb_28527	FVNDGEFGPFVVEYDANYR	File5999 Spectrum320790 scans: 15706
10	Garb_28527	FVNDGEFGPFVVEYDANYR	File5997 Spectrum273953 scans: 15432
10	Garb_28527	FVNDGEFGPFVVEYDANYR	File5999 Spectrum320873 scans: 15794
10	Garb_28527	FVNDGEFGPFVVEYDANYR	File5999 Spectrum320872 scans: 15793
10	Garb_28527	LEGVDHFMSQYNEGEGIK	File5990 Spectrum103221 scans: 12862
10	Garb_28527	LEGVDHFMSQYNEGEGIK	File5991 Spectrum129512 scans: 15042
10	Garb_28527	LEGVDHFMSQYNEGEGIK	File5991 Spectrum129632 scans: 15170
10	Garb_28527	LEGVDHFMSQYNEGEGIK	File5990 Spectrum101832 scans: 11380
10	Garb_28527	LEGVDHFMSQYNEGEGIK	File5991 Spectrum127287 scans: 12668
10	Garb_28527	LEGVDHFMSQYNEGEGIK	File5991 Spectrum129494 scans: 15022
10	Garb_28527	LEGVDHFMSQYNEGEGIK	File5991 Spectrum129587 scans: 15122
10	Garb_28527	LEGVDHFMSQYNEGEGIK	File5991 Spectrum129588 scans: 15123
10	Garb_28527	LEGVDHFMSQYNEGEGIK	File5992 Spectrum153226 scans: 13902
10	Garb_28527	LEGVDHFMSQYNEGEGIK	File5990 Spectrum101825 scans: 11373
10	Garb_28527	LEGVDHFMSQYNEGEGIK	File5991 Spectrum129646 scans: 15185
10	Garb_28527	LEGVDHFMSQYNEGEGIK	File5992 Spectrum153093 scans: 13760
10	Garb_28527	LEGVDHFMSQYNEGEGIK	File5991 Spectrum129647 scans: 15186
10	Garb_28527	LEGVDHFMSQYNEGEGIK	File5991 Spectrum129779 scans: 15326
10	Garb_28527	LEGVDHFMSQYNEGEGIK	File5992 Spectrum152954 scans: 13612
10	Garb_28527	LEGVDHFMSQYNEGEGIK	File5991 Spectrum127309 scans: 12692
10	Garb_28527	FIWQSFDHPTDTLLVGQSLR	File5993 Spectrum177293 scans: 14579
10	Garb_28527	FIWQSFDHPTDTLLVGQSLR	File5987 Spectrum36456 scans: 16631
10	Garb_28527	FIWQSFDHPTDTLLVGQSLR	File5987 Spectrum36326 scans: 16492
10	Garb_28527	FIWQSFDHPTDTLLVGQSLR	File5988 Spectrum59823 scans: 16821
10	Garb_28527	FIWQSFDHPTDTLLVGQSLR	File5987 Spectrum36357 scans: 16525
10	Garb_28527	LEGVDHFMSQYNEGEGIK	File5992 Spectrum150074 scans: 10540
10	Garb_28527	LEGVDHFMSQYNEGEGIK	File5991 Spectrum126867 scans: 12220
10	Garb_28527	LEGVDHFMSQYNEGEGIK	File5991 Spectrum126869 scans: 12222
10	Garb_28527	LEGVDHFMSQYNEGEGIK	File5991 Spectrum125652 scans: 10924
10	Garb_28527	LEGVDHFMSQYNEGEGIK	File5991 Spectrum125670 scans: 10943
10	Garb_28527	LEGVDHFMSQYNEGEGIK	File5992 Spectrum150207 scans: 10682
10	Garb_28527	LEGVDHFMSQYNEGEGIK	File5991 Spectrum126790 scans: 12138
10	Garb_28527	LEGVDHFMSQYNEGEGIK	File5991 Spectrum126917 scans: 12274
10	Garb_28527	LEGVDHFMSQYNEGEGIK	File5992 Spectrum150119 scans: 10588
10	Garb_28527	LEGVDHFMSQYNEGEGIK	File5991 Spectrum126829 scans: 12180
10	Garb_28527	FVNDGEFGPFVVEYDANYR	File5990 Spectrum105603 scans: 15403
10	Garb_28527	FVNDGEFGPFVVEYDANYR	File5991 Spectrum131101 scans: 16737
10	Garb_28527	FVNDGEFGPFVVEYDANYR	File5990 Spectrum105346 scans: 15128
10	Garb_28527	FVNDGEFGPFVVEYDANYR	File5990 Spectrum105470 scans: 15261
10	Garb_28527	FVNDGEFGPFVVEYDANYR	File5990 Spectrum105723 scans: 15531
10	Garb_28527	FVNDGEFGPFVVEYDANYR	File5991 Spectrum131238 scans: 16883
11	Garb_16553	VVDLLAPYQR	File6002 Spectrum387970 scans: 14633
11	Garb_16553	VVDLLAPYQR	File6002 Spectrum387843 scans: 14497
11	Garb_16553	TIAMDGTEGLVR	File6001 Spectrum360483 scans: 9820
11	Garb_16553	TIAMDGTEGLVR	File6001 Spectrum360422 scans: 9755
11	Garb_16553	TIAMDGTEGLVR	File6000 Spectrum336891 scans: 8854
11	Garb_16553	TIAMDGTEGLVR	File6001 Spectrum358545 scans: 7753
11	Garb_16553	TIAMDGTEGLVR	File6001 Spectrum358673 scans: 7890
11	Garb_16553	TIAMDGTEGLVR	File6000 Spectrum335023 scans: 6861
11	Garb_16553	TIAMDGTEGLVR	File6001 Spectrum357913 scans: 7079
11	Garb_16553	IGLFGGAGVGK	File5991 Spectrum128717 scans: 14194
11	Garb_16553	IGLFGGAGVGK	File5992 Spectrum152158 scans: 12763
11	Garb_16553	IGLFGGAGVGK	File5991 Spectrum128587 scans: 14055
11	Garb_16553	IGLFGGAGVGK	File5992 Spectrum152291 scans: 12905
11	Garb_16553	EMIESGVIK	File5987 Spectrum29405 scans: 9110
11	Garb_16553	EMIESGVIK	File5987 Spectrum29275 scans: 8971
11	Garb_16553	EMIESGVIK	File5987 Spectrum27635 scans: 7222
11	Garb_16553	EMIESGVIK	File5987 Spectrum27508 scans: 7086
11	Garb_16553	EMIESGVIK	File5988 Spectrum50887 scans: 7290
11	Garb_16553	EMIESGVIK	File5988 Spectrum50795 scans: 7191
11	Garb_16553	FTQANSEVSALLGR	File6002 Spectrum387706 scans: 14351
11	Garb_16553	FTQANSEVSALLGR	File6002 Spectrum387836 scans: 14490
11	Garb_16553	FTQANSEVSALLGR	File6001 Spectrum365052 scans: 14694
11	Garb_16553	IINVIGEPIDEK	File6005 Spectrum455939 scans: 13927
11	Garb_16553	IINVIGEPIDEK	File6005 Spectrum455807 scans: 13786
11	Garb_16553	IINVIGEPIDEK	File5987 Spectrum34081 scans: 14097
11	Garb_16553	IINVIGEPIDEK	File5987 Spectrum34066 scans: 14081
11	Garb_16553	IINVIGEPIDEK	File6005 Spectrum455819 scans: 13799
11	Garb_16553	IINVIGEPIDEK	File5987 Spectrum33992 scans: 14002
11	Garb_16553	ESITSFQGVLDGK	File5987 Spectrum32741 scans: 12668
11	Garb_16553	ESITSFQGVLDGK	File6005 Spectrum454809 scans: 12721
11	Garb_16553	ESITSFQGVLDGK	File6005 Spectrum454705 scans: 12610
11	Garb_16553	ESITSFQGVLDGK	File6005 Spectrum454843 scans: 12758
11	Garb_16553	ESITSFQGVLDGK	File5987 Spectrum32797 scans: 12728
11	Garb_16553	ESITSFQGVLDGK	File6005 Spectrum453467 scans: 11290
11	Garb_16553	GQPVLNTGSPITVPVGR	File6003 Spectrum407093 scans: 10645
11	Garb_16553	GQPVLNTGSPITVPVGR	File6003 Spectrum407009 scans: 10555
11	Garb_16553	GQPVLNTGSPITVPVGR	File6003 Spectrum406960 scans: 10503
11	Garb_16553	GQPVLNTGSPITVPVGR	File6002 Spectrum384193 scans: 10604
11	Garb_16553	GQPVLNTGSPITVPVGR	File6002 Spectrum384214 scans: 10626
11	Garb_16553	GQPVLNTGSPITVPVGR	File6003 Spectrum406948 scans: 10490
11	Garb_16553	LVLEVAQHLGENMVR	File5989 Spectrum84333 scans: 18063
11	Garb_16553	DAEGQDVLLFIDNIFR	File5999 Spectrum326570 scans: 21871
11	Garb_16553	QISELGIYPAVDPLDSTSR	File5999 Spectrum319781 scans: 14629
11	Garb_16553	QISELGIYPAVDPLDSTSR	File5999 Spectrum319472 scans: 14300
11	Garb_16553	QISELGIYPAVDPLDSTSR	File5999 Spectrum319570 scans: 14404
11	Garb_16553	IPSAVGYQPTLATDLGGLQER	File6000 Spectrum341545 scans: 13818
11	Garb_16553	IPSAVGYQPTLATDLGGLQER	File6000 Spectrum341558 scans: 13832
11	Garb_16553	NLQDIIAILGMDELSEDDK	File6003 Spectrum415156 scans: 19245
11	Garb_16553	NLQDIIAILGMDELSEDDK	File6003 Spectrum415016 scans: 19096
11	Garb_16553	NLQDIIAILGMDELSEDDK	File6003 Spectrum415002 scans: 19081
11	Garb_16553	NLQDIIAILGMDELSEDDK	File6003 Spectrum414529 scans: 18576
11	Garb_16553	EAPAFVDQATEQQILVTGIK	File6003 Spectrum410375 scans: 14145
11	Garb_16553	EAPAFVDQATEQQILVTGIK	File6003 Spectrum410362 scans: 14131
11	Garb_16553	EAPAFVDQATEQQILVTGIK	File6003 Spectrum410351 scans: 14120
11	Garb_16553	IPSAVGYQPTLATDLGGLQER	File5993 Spectrum176052 scans: 13255
11	Garb_16553	YDDLPEQSFYMVGGIEEVIAK	File6000 Spectrum345745 scans: 18298
11	Garb_16553	YDDLPEQSFYMVGGIEEVIAK	File6001 Spectrum368837 scans: 18731
11	Garb_16553	NLQDIIAILGMDELSEDDKLTVAR	File5988 Spectrum62033 scans: 19179
11	Garb_16553	NLQDIIAILGMDELSEDDKLTVAR	File5988 Spectrum61594 scans: 18710
11	Garb_16553	NLQDIIAILGMDELSEDDKLTVAR	File5988 Spectrum61609 scans: 18726
12	Garb_38039	YFAGIAK	File5990 Spectrum100908 scans: 10395
12	Garb_38039	AFMDATGGLWR	File6003 Spectrum410198 scans: 13957
12	Garb_38039	AFMDATGGLWR	File6003 Spectrum408272 scans: 11902
12	Garb_38039	FGMMAAQFK	File5991 Spectrum129505 scans: 15034
12	Garb_38039	FGMMAAQFK	File5991 Spectrum129586 scans: 15121
12	Garb_38039	FGMMAAQFK	File5990 Spectrum104092 scans: 13791
12	Garb_38039	FGMMAAQFK	File5990 Spectrum104227 scans: 13935
12	Garb_38039	FGMMAAQFK	File5991 Spectrum129456 scans: 14982
12	Garb_38039	FGMMAAQFK	File5991 Spectrum129439 scans: 14964
12	Garb_38039	FGMMAAQFK	File5991 Spectrum127792 scans: 13207
12	Garb_38039	FGMMAAQFK	File5990 Spectrum100887 scans: 10372
12	Garb_38039	FGMMAAQFK	File5992 Spectrum151115 scans: 11650
12	Garb_38039	GGSPYGAGTFAGDGSR	File6003 Spectrum403111 scans: 6397
12	Garb_38039	GGSPYGAGTFAGDGSR	File6003 Spectrum403074 scans: 6358
12	Garb_38039	GGSPYGAGTFAGDGSR	File6002 Spectrum379826 scans: 5946
12	Garb_38039	GGSPYGAGTFAGDGSR	File6003 Spectrum402827 scans: 6094
12	Garb_38039	GGSPYGAGTFAGDGSR	File6002 Spectrum379962 scans: 6091
12	Garb_38039	GGSPYGAGTFAGDGSR	File6003 Spectrum402955 scans: 6231
12	Garb_38039	GGSPYGAGTFAGDGSR	File6003 Spectrum402938 scans: 6213
12	Garb_38039	GGSPYGAGTFAGDGSR	File6005 Spectrum448530 scans: 6024
12	Garb_38039	GGSPYGAGTFAGDGSR	File6004 Spectrum425543 scans: 5897
12	Garb_38039	GGSPYGAGTFAGDGSR	File6001 Spectrum357257 scans: 6379
12	Garb_38039	GGSPYGAGTFAGDGSR	File6003 Spectrum402810 scans: 6076
12	Garb_38039	GGSPYGAGTFAGDGSR	File6001 Spectrum357251 scans: 6373
12	Garb_38039	GGSPYGAGTFAGDGSR	File6004 Spectrum425541 scans: 5895
12	Garb_38039	GGSPYGAGTFAGDGSR	File6002 Spectrum379700 scans: 5811
12	Garb_38039	GGSPYGAGTFAGDGSR	File6003 Spectrum402877 scans: 6147
12	Garb_38039	GGSPYGAGTFAGDGSR	File6002 Spectrum379694 scans: 5805
12	Garb_38039	QPSELELGQAFHQGK	File5987 Spectrum31417 scans: 11256
12	Garb_38039	QPSELELGQAFHQGK	File6004 Spectrum430630 scans: 11323
12	Garb_38039	QPSELELGQAFHQGK	File6003 Spectrum407820 scans: 11420
12	Garb_38039	QPSELELGQAFHQGK	File6003 Spectrum407933 scans: 11541
12	Garb_38039	QPSELELGQAFHQGK	File6004 Spectrum430727 scans: 11427
12	Garb_38039	QPSELELGQAFHQGK	File6003 Spectrum407802 scans: 11401
12	Garb_38039	QPSELELGQAFHQGK	File6004 Spectrum430597 scans: 11288
12	Garb_38039	KGAESVEGVEVK	File5998 Spectrum289024 scans: 6868
12	Garb_38039	QPSELELGQAFHQGK	File5995 Spectrum220838 scans: 10462
12	Garb_38039	QPSELELGQAFHQGK	File5994 Spectrum196388 scans: 9862
12	Garb_38039	QPSELELGQAFHQGK	File5995 Spectrum220964 scans: 10597
12	Garb_38039	QPSELELGQAFHQGK	File5995 Spectrum220994 scans: 10629
12	Garb_38039	QPSELELGQAFHQGK	File5995 Spectrum220859 scans: 10485
12	Garb_38039	QPSELELGQAFHQGK	File5994 Spectrum196446 scans: 9924
12	Garb_38039	LWQVAETLPEEVLGK	File6005 Spectrum460662 scans: 18965
12	Garb_38039	LWQVAETLPEEVLGK	File6005 Spectrum460540 scans: 18834
12	Garb_38039	LWQVAETLPEEVLGK	File6005 Spectrum460568 scans: 18864
12	Garb_38039	LWQVAETLPEEVLGK	File5987 Spectrum38501 scans: 18812
12	Garb_38039	LWQVAETLPEEVLGK	File6005 Spectrum461228 scans: 19568
12	Garb_38039	LWQVAETLPEEVLGK	File6004 Spectrum437954 scans: 19135
12	Garb_38039	LWQVAETLPEEVLGK	File6005 Spectrum461204 scans: 19543
12	Garb_38039	TDAPIITPDELTEADGVLFGFPTR	File5997 Spectrum276013 scans: 17629
12	Garb_38039	TDAPIITPDELTEADGVLFGFPTR	File5997 Spectrum275557 scans: 17143
12	Garb_38039	TDAPIITPDELTEADGVLFGFPTR	File5997 Spectrum276140 scans: 17765
12	Garb_38039	TDAPIITPDELTEADGVLFGFPTR	File5997 Spectrum276007 scans: 17623
12	Garb_38039	TDAPIITPDELTEADGVLFGFPTR	File5997 Spectrum276051 scans: 17670
12	Garb_38039	TDAPIITPDELTEADGVLFGFPTR	File5997 Spectrum276262 scans: 17895
12	Garb_38039	TDAPIITPDELTEADGVLFGFPTR	File5997 Spectrum275582 scans: 17169
13	Garb_04701	FASAVVISK	File5989 Spectrum77720 scans: 11009
13	Garb_04701	FASAVVISK	File5989 Spectrum77878 scans: 11177
13	Garb_04701	FASAVVISK	File5989 Spectrum77724 scans: 11013
13	Garb_04701	SYIWPVDK	File5987 Spectrum31624 scans: 11477
13	Garb_04701	SYIWPVDK	File5988 Spectrum54715 scans: 11373
13	Garb_04701	SYIWPVDK	File5987 Spectrum31488 scans: 11331
13	Garb_04701	SQTNYDLVYK	File6005 Spectrum450288 scans: 7899
13	Garb_04701	SQTNYDLVYK	File6005 Spectrum450434 scans: 8055
13	Garb_04701	SQTNYDLVYK	File5987 Spectrum28588 scans: 8238
13	Garb_04701	SQTNYDLVYK	File6005 Spectrum450389 scans: 8007
13	Garb_04701	SQTNYDLVYK	File6005 Spectrum450321 scans: 7934
13	Garb_04701	SQTNYDLVYK	File6005 Spectrum450464 scans: 8087
13	Garb_04701	SQTNYDLVYK	File5987 Spectrum28700 scans: 8358
13	Garb_04701	ELGNVILSQGVYSR	File6000 Spectrum340277 scans: 12465
13	Garb_04701	SQTNYDLVYK	File5987 Spectrum28568 scans: 8217
13	Garb_04701	ELGNVILSQGVYSR	File6000 Spectrum340355 scans: 12549
13	Garb_04701	ELGNVILSQGVYSR	File6001 Spectrum363329 scans: 12856
13	Garb_04701	ELGNVILSQGVYSR	File6001 Spectrum363458 scans: 12994
13	Garb_04701	ELGNVILSQGVYSR	File6000 Spectrum340225 scans: 12410
13	Garb_04701	VMIQSSSSSVLMK	File5987 Spectrum30919 scans: 10725
13	Garb_04701	VMIQSSSSSVLMK	File5989 Spectrum76236 scans: 9426
13	Garb_04701	VMIQSSSSSVLMK	File5987 Spectrum29663 scans: 9385
13	Garb_04701	VMIQSSSSSVLMK	File5988 Spectrum52804 scans: 9334
13	Garb_04701	VMIQSSSSSVLMK	File5987 Spectrum29812 scans: 9544
13	Garb_04701	VMIQSSSSSVLMK	File5987 Spectrum29680 scans: 9403
13	Garb_04701	VMIQSSSSSVLMK	File5988 Spectrum52796 scans: 9326
13	Garb_04701	VMIQSSSSSVLMK	File5989 Spectrum75389 scans: 8522
13	Garb_04701	VMIQSSSSSVLMK	File5988 Spectrum51553 scans: 8000
13	Garb_04701	VMIQSSSSSVLMK	File5987 Spectrum28511 scans: 8156
13	Garb_04701	ELGNVILSQGVYSR	File5994 Spectrum198588 scans: 12209
13	Garb_04701	VDEDIGGAQSSTIDDIK	File6005 Spectrum451777 scans: 9487
13	Garb_04701	VDEDIGGAQSSTIDDIK	File6002 Spectrum383465 scans: 9827
13	Garb_04701	VDEDIGGAQSSTIDDIK	File6003 Spectrum406336 scans: 9837
13	Garb_04701	VDEDIGGAQSSTIDDIK	File6003 Spectrum406307 scans: 9806
13	Garb_04701	VDEDIGGAQSSTIDDIK	File6003 Spectrum406299 scans: 9798
13	Garb_04701	VDEDIGGAQSSTIDDIK	File6002 Spectrum383501 scans: 9866
13	Garb_04701	DLYLLPSTSLVLDAHK	File5989 Spectrum82054 scans: 15632
13	Garb_04701	DSVFPETSAFITSATNVVPR	File5999 Spectrum320778 scans: 15693
13	Garb_04701	DSVFPETSAFITSATNVVPR	File5999 Spectrum320785 scans: 15700
13	Garb_04701	DSVFPETSAFITSATNVVPR	File5999 Spectrum320909 scans: 15833
13	Garb_04701	DSVFPETSAFITSATNVVPR	File5999 Spectrum320910 scans: 15834
13	Garb_04701	VDEDIGGAQSSTIDDIKR	File5990 Spectrum99947 scans: 9369
13	Garb_04701	FDGNNYPIMTVQDTYAQLNPPR	File5999 Spectrum319862 scans: 14716
13	Garb_04701	FDGNNYPIMTVQDTYAQLNPPR	File5999 Spectrum319998 scans: 14861
13	Garb_04701	FDGNNYPIMTVQDTYAQLNPPR	File5999 Spectrum319920 scans: 14778
14	cotton_GLEAN_10026304	ANLPEEDIK	File5988 Spectrum51039 scans: 7452
14	cotton_GLEAN_10026304	ANLPEEDIK	File5989 Spectrum74382 scans: 7448
14	cotton_GLEAN_10026304	ANLPEEDIK	File5988 Spectrum50912 scans: 7316
14	cotton_GLEAN_10026304	ANLPEEDIK	File5988 Spectrum50906 scans: 7310
14	cotton_GLEAN_10026304	DDLFNINAGIVK	File5988 Spectrum56609 scans: 13393
14	cotton_GLEAN_10026304	DDLFNINAGIVK	File6004 Spectrum432682 scans: 13512
14	cotton_GLEAN_10026304	DDLFNINAGIVK	File6005 Spectrum455543 scans: 13504
14	cotton_GLEAN_10026304	DDLFNINAGIVK	File5987 Spectrum33829 scans: 13829
14	cotton_GLEAN_10026304	DDLFNINAGIVK	File6005 Spectrum455726 scans: 13699
14	cotton_GLEAN_10026304	DDLFNINAGIVK	File6005 Spectrum455577 scans: 13541
14	cotton_GLEAN_10026304	DDLFNINAGIVK	File6005 Spectrum455455 scans: 13410
14	cotton_GLEAN_10026304	DDLFNINAGIVK	File6005 Spectrum455445 scans: 13400
14	cotton_GLEAN_10026304	DDLFNINAGIVK	File5987 Spectrum33698 scans: 13689
14	cotton_GLEAN_10026304	SEVAGYVGEDQLK	File6005 Spectrum451057 scans: 8719
14	cotton_GLEAN_10026304	SEVAGYVGEDQLK	File6004 Spectrum428254 scans: 8789
14	cotton_GLEAN_10026304	SEVAGYVGEDQLK	File6004 Spectrum428253 scans: 8788
14	cotton_GLEAN_10026304	VAVLGAAGGIGQPLALLMK	File5990 Spectrum108576 scans: 18574
14	cotton_GLEAN_10026304	VAVLGAAGGIGQPLALLMK	File5988 Spectrum61603 scans: 18720
14	cotton_GLEAN_10026304	VAVLGAAGGIGQPLALLMK	File5987 Spectrum38120 scans: 18406
14	cotton_GLEAN_10026304	VAVLGAAGGIGQPLALLMK	File5987 Spectrum38067 scans: 18349
14	cotton_GLEAN_10026304	VAVLGAAGGIGQPLALLMK	File5987 Spectrum37989 scans: 18266
14	cotton_GLEAN_10026304	VAVLGAAGGIGQPLALLMK	File5988 Spectrum61598 scans: 18715
14	cotton_GLEAN_10026304	VAVLGAAGGIGQPLALLMK	File5988 Spectrum61587 scans: 18703
14	cotton_GLEAN_10026304	VAVLGAAGGIGQPLALLMK	File5987 Spectrum38141 scans: 18428
14	cotton_GLEAN_10026304	VAVLGAAGGIGQPLALLMK	File5987 Spectrum36908 scans: 17113
14	cotton_GLEAN_10026304	VAVLGAAGGIGQPLALLMK	File5987 Spectrum36931 scans: 17137
14	cotton_GLEAN_10026304	VAVLGAAGGIGQPLALLMK	File5987 Spectrum36928 scans: 17134
14	cotton_GLEAN_10026304	VAVLGAAGGIGQPLALLMK	File5988 Spectrum60357 scans: 17391
14	cotton_GLEAN_10026304	VAVLGAAGGIGQPLALLMK	File5988 Spectrum60230 scans: 17255
14	cotton_GLEAN_10026304	VAVLGAAGGIGQPLALLMK	File5987 Spectrum37042 scans: 17256
14	cotton_GLEAN_10026304	VAVLGAAGGIGQPLALLMK	File5989 Spectrum83841 scans: 17538
14	cotton_GLEAN_10026304	VAVLGAAGGIGQPLALLMK	File5988 Spectrum60256 scans: 17283
14	cotton_GLEAN_10026304	VAVLGAAGGIGQPLALLMK	File5987 Spectrum36927 scans: 17133
14	cotton_GLEAN_10026304	ANVADVNVPVVGGHAGITILPLFSQATPK	File5990 Spectrum107252 scans: 17161
14	cotton_GLEAN_10026304	ANVADVNVPVVGGHAGITILPLFSQATPK	File5990 Spectrum107282 scans: 17193
15	Garb_42406	DYWIVK	File5987 Spectrum31001 scans: 10812
15	Garb_42406	AVANQPVSVAIEAGGR	File6002 Spectrum382401 scans: 8692
15	Garb_42406	AVANQPVSVAIEAGGR	File6004 Spectrum428327 scans: 8867
15	Garb_42406	AVANQPVSVAIEAGGR	File6002 Spectrum381376 scans: 7599
15	Garb_42406	AVANQPVSVAIEAGGR	File6002 Spectrum382677 scans: 8987
15	Garb_42406	AVANQPVSVAIEAGGR	File6002 Spectrum382232 scans: 8512
15	Garb_42406	AVANQPVSVAIEAGGR	File6003 Spectrum405255 scans: 8684
15	Garb_42406	AVANQPVSVAIEAGGR	File6002 Spectrum382381 scans: 8671
15	Garb_42406	AVANQPVSVAIEAGGR	File6003 Spectrum405384 scans: 8822
15	Garb_42406	AVANQPVSVAIEAGGR	File6002 Spectrum382542 scans: 8843
15	Garb_42406	AVANQPVSVAIEAGGR	File6003 Spectrum405339 scans: 8774
15	Garb_42406	AVANQPVSVAIEAGGR	File6002 Spectrum382662 scans: 8971
15	Garb_42406	AVANQPVSVAIEAGGR	File6003 Spectrum405207 scans: 8633
15	Garb_42406	AVANQPVSVAIEAGGR	File6002 Spectrum382525 scans: 8825
15	Garb_42406	NSWGSSWGEAGYIR	File6002 Spectrum385441 scans: 11935
15	Garb_42406	NSWGSSWGEAGYIR	File6002 Spectrum385571 scans: 12074
15	Garb_42406	NSWGSSWGEAGYIR	File6003 Spectrum408447 scans: 12089
15	Garb_42406	NSWGSSWGEAGYIR	File6002 Spectrum385075 scans: 11545
15	Garb_42406	NSWGSSWGEAGYIR	File6002 Spectrum385029 scans: 11495
15	Garb_42406	NSWGSSWGEAGYIR	File6002 Spectrum385043 scans: 11510
15	Garb_42406	NSWGSSWGEAGYIR	File6003 Spectrum408027 scans: 11641
15	Garb_42406	SFQLYQSGIFDGK	File5990 Spectrum103643 scans: 13312
15	Garb_42406	SFQLYQSGIFDGK	File5987 Spectrum33077 scans: 13026
15	Garb_42406	SFQLYQSGIFDGK	File5987 Spectrum33350 scans: 13318
15	Garb_42406	SFQLYQSGIFDGK	File5988 Spectrum56537 scans: 13316
15	Garb_42406	SFQLYQSGIFDGK	File5987 Spectrum33223 scans: 13182
15	Garb_42406	SFQLYQSGIFDGK	File5987 Spectrum33351 scans: 13319
15	Garb_42406	SFQLYQSGIFDGK	File5987 Spectrum33068 scans: 13017
15	Garb_42406	SFQLYQSGIFDGK	File5987 Spectrum33226 scans: 13185
15	Garb_42406	SFQLYQSGIFDGK	File5988 Spectrum56538 scans: 13317
15	Garb_42406	KAVANQPVSVAIEAGGR	File5996 Spectrum243911 scans: 8856
15	Garb_42406	VVSINDYEDVPVNDEK	File6003 Spectrum407324 scans: 10891
15	Garb_42406	VVSINDYEDVPVNDEK	File6004 Spectrum430017 scans: 10669
15	Garb_42406	VVSINDYEDVPVNDEK	File6003 Spectrum407177 scans: 10734
15	Garb_42406	VVSINDYEDVPVNDEK	File6003 Spectrum407325 scans: 10892
15	Garb_42406	VVSINDYEDVPVNDEK	File6003 Spectrum407185 scans: 10743
16	cotton_GLEAN_10030112	AFDNELIK	File5988 Spectrum53452 scans: 10026
16	cotton_GLEAN_10030112	TLVEESIDAADR	File6000 Spectrum338384 scans: 10446
16	cotton_GLEAN_10030112	SQNILSGVGSK	File5989 Spectrum75397 scans: 8531
16	cotton_GLEAN_10030112	DQEASVIVESEDR	File5999 Spectrum313356 scans: 7776
16	cotton_GLEAN_10030112	DQEASVIVESEDR	File5999 Spectrum313453 scans: 7880
16	cotton_GLEAN_10030112	DQEASVIVESEDR	File5999 Spectrum313324 scans: 7742
16	cotton_GLEAN_10030112	TDSGSDAPVMVEAPR	File6000 Spectrum333642 scans: 5388
16	cotton_GLEAN_10030112	EESAEATDLIETSAR	File5999 Spectrum315169 scans: 9710
16	cotton_GLEAN_10030112	EESAEATDLIETSAR	File5999 Spectrum315268 scans: 9816
16	cotton_GLEAN_10030112	EESAEATDLIETSAR	File5999 Spectrum315136 scans: 9675
16	cotton_GLEAN_10030112	EAAPVEAAGTIQAK	File6005 Spectrum449635 scans: 7202
16	cotton_GLEAN_10030112	ESALAAVEPEETK	File6004 Spectrum428466 scans: 9015
16	cotton_GLEAN_10030112	ESALAAVEPEETK	File6004 Spectrum428464 scans: 9013
16	cotton_GLEAN_10030112	ESALAAVEPEETK	File6004 Spectrum428296 scans: 8833
16	cotton_GLEAN_10030112	ESTEENESIPLK	File6004 Spectrum426666 scans: 7095
16	cotton_GLEAN_10030112	ADDPTLDVPTIESK	File6004 Spectrum429778 scans: 10414
16	cotton_GLEAN_10030112	ADDPTLDVPTIESK	File6003 Spectrum406849 scans: 10384
16	cotton_GLEAN_10030112	ADDPTLDVPTIESK	File6003 Spectrum406867 scans: 10403
16	cotton_GLEAN_10030112	IEEQIQEVAEIVK	File6004 Spectrum436385 scans: 17462
16	cotton_GLEAN_10030112	IEEQIQEVAEIVK	File6004 Spectrum436409 scans: 17487
16	cotton_GLEAN_10030112	TSQDEQLSDLGLEK	File6004 Spectrum429199 scans: 9797
16	cotton_GLEAN_10030112	TSQDEQLSDLGLEK	File6004 Spectrum429130 scans: 9723
16	cotton_GLEAN_10030112	LTENASPSLEIQDSK	File6004 Spectrum428528 scans: 9081
16	cotton_GLEAN_10030112	LTENASPSLEIQDSK	File6005 Spectrum451451 scans: 9139
16	cotton_GLEAN_10030112	EAITVPGEAIEKPEAR	File5992 Spectrum148953 scans: 9344
16	cotton_GLEAN_10030112	EAITVPGEAIEKPEAR	File5991 Spectrum125328 scans: 10579
16	cotton_GLEAN_10030112	TESALEPEVNEVEQAK	File6003 Spectrum406970 scans: 10513
16	cotton_GLEAN_10030112	TESALEPEVNEVEQAK	File6003 Spectrum407022 scans: 10569
16	cotton_GLEAN_10030112	AEEEISKPILDLK	File5995 Spectrum223396 scans: 13191
16	cotton_GLEAN_10030112	AEEEISKPILDLK	File5995 Spectrum223400 scans: 13195
16	cotton_GLEAN_10030112	TNETSETPILENQNEK	File6004 Spectrum426094 scans: 6485
16	cotton_GLEAN_10030112	AFDNELIKEELVK	File5996 Spectrum248116 scans: 13341
16	cotton_GLEAN_10030112	IETATVVQEESSLELPK	File6003 Spectrum409656 scans: 13378
16	cotton_GLEAN_10030112	EAPISDISSSMISDETVK	File6003 Spectrum408793 scans: 12458
16	cotton_GLEAN_10030112	EAPISDISSSMISDETVK	File6003 Spectrum406453 scans: 9962
16	cotton_GLEAN_10030112	SQADETITEVQNQESEK	File6003 Spectrum402802 scans: 6067
16	cotton_GLEAN_10030112	SQADETITEVQNQESEK	File6004 Spectrum427031 scans: 7484
16	cotton_GLEAN_10030112	SQADETITEVQNQESEK	File6004 Spectrum427054 scans: 7509
16	cotton_GLEAN_10030112	SQADETITEVQNQESEK	File6004 Spectrum427049 scans: 7503
16	cotton_GLEAN_10030112	SQADETITEVQNQESEK	File6003 Spectrum404313 scans: 7679
16	cotton_GLEAN_10030112	SHEILTEVGVETSLDNTK	File5991 Spectrum127585 scans: 12986
16	cotton_GLEAN_10030112	VVSVEETIVDQGLQNEEPK	File6003 Spectrum411401 scans: 15240
16	cotton_GLEAN_10030112	VVSVEETIVDQGLQNEEPK	File6003 Spectrum411356 scans: 15192
16	cotton_GLEAN_10030112	GAQDQIPEVINMNDNEGQSK	File6004 Spectrum429631 scans: 10257
16	cotton_GLEAN_10030112	EEVQGVAETSYLTSEPELPVK	File6001 Spectrum363642 scans: 13190
16	cotton_GLEAN_10030112	VPYEHSETPVPQATDEILMEK	File5989 Spectrum78891 scans: 12258
16	cotton_GLEAN_10030112	TLVEGSIDTADPESAPAAAESEETK	File6001 Spectrum360773 scans: 10130
17	Garb_12714	DAGVIAGLNVMR	File6003 Spectrum408838 scans: 12506
17	Garb_12714	DAGVIAGLNVMR	File6002 Spectrum385787 scans: 12304
17	Garb_12714	DAGVIAGLNVMR	File6002 Spectrum385823 scans: 12342
17	Garb_12714	DAGVIAGLNVMR	File6002 Spectrum383410 scans: 9769
17	Garb_12714	FEELNMDLFR	File6001 Spectrum367081 scans: 16858
17	Garb_12714	NALENYAYNMR	File6002 Spectrum383819 scans: 10205
17	Garb_12714	NALENYAYNMR	File6002 Spectrum383950 scans: 10345
17	Garb_12714	NALENYAYNMR	File6002 Spectrum381558 scans: 7793
17	Garb_12714	NALENYAYNMR	File6002 Spectrum381530 scans: 7763
17	Garb_12714	STVHDVVLVGGSTR	File5989 Spectrum74135 scans: 7185
17	Garb_12714	TTPSYVGFTDTER	File6001 Spectrum359291 scans: 8549
17	Garb_12714	ATAGDTHLGGEDFDNR	File5988 Spectrum49506 scans: 5816
17	Garb_12714	ATAGDTHLGGEDFDNR	File5989 Spectrum72596 scans: 5543
17	Garb_12714	NAVVTVPAYFNDSQR	File6001 Spectrum362050 scans: 11492
17	Garb_12714	NAVVTVPAYFNDSQR	File6001 Spectrum362130 scans: 11577
17	Garb_12714	NAVVTVPAYFNDSQR	File6001 Spectrum361992 scans: 11430
17	Garb_12714	QFAAEEISSMVLIK	File6005 Spectrum457747 scans: 15855
17	Garb_12714	IINEPTAAAIAYGLDK	File6005 Spectrum456465 scans: 14488
17	Garb_12714	IINEPTAAAIAYGLDK	File6004 Spectrum433653 scans: 14548
17	Garb_12714	IINEPTAAAIAYGLDK	File6004 Spectrum433525 scans: 14411
17	Garb_12714	IINEPTAAAIAYGLDK	File6004 Spectrum433536 scans: 14423
17	Garb_12714	NQVAMNPINTVFDAK	File5987 Spectrum33573 scans: 13555
17	Garb_12714	NQVAMNPINTVFDAK	File5987 Spectrum33562 scans: 13544
17	Garb_12714	NQVAMNPINTVFDAK	File5987 Spectrum32336 scans: 12236
17	Garb_12714	NQVAMNPINTVFDAK	File5988 Spectrum55542 scans: 12255
17	Garb_12714	EQVFSTYSDNQPGVLIQVYEGER	File5997 Spectrum273095 scans: 14517
17	Garb_12714	EQVFSTYSDNQPGVLIQVYEGER	File5997 Spectrum273077 scans: 14497
17	Garb_12714	EQVFSTYSDNQPGVLIQVYEGER	File5997 Spectrum272964 scans: 14377
17	Garb_12714	EQVFSTYSDNQPGVLIQVYEGER	File5999 Spectrum319830 scans: 14682
17	Garb_12714	EQVFSTYSDNQPGVLIQVYEGER	File5997 Spectrum272955 scans: 14367
17	Garb_12714	MYQGAGGDMGGGMDEDVPAGGSGAGPK	File6004 Spectrum427983 scans: 8500
17	Garb_12714	MYQGAGGDMGGGMDEDVPAGGSGAGPK	File6005 Spectrum449558 scans: 7120
17	Garb_12714	MYQGAGGDMGGGMDEDVPAGGSGAGPK	File6004 Spectrum426854 scans: 7295
17	Garb_12714	MYQGAGGDMGGGMDEDVPAGGSGAGPK	File6004 Spectrum426889 scans: 7333
17	Garb_12714	MYQGAGGDMGGGMDEDVPAGGSGAGPK	File6004 Spectrum426750 scans: 7184
17	Garb_12714	MYQGAGGDMGGGMDEDVPAGGSGAGPK	File6004 Spectrum425795 scans: 6166
17	Garb_12714	MYQGAGGDMGGGMDEDVPAGGSGAGPK	File6005 Spectrum448589 scans: 6087
17	Garb_12714	MYQGAGGDMGGGMDEDVPAGGSGAGPK	File6004 Spectrum425659 scans: 6021
17	Garb_12714	MYQGAGGDMGGGMDEDVPAGGSGAGPK	File6004 Spectrum425617 scans: 5976
17	Garb_12714	MYQGAGGDMGGGMDEDVPAGGSGAGPK	File6005 Spectrum447532 scans: 4959
17	Garb_12714	MYQGAGGDMGGGMDEDVPAGGSGAGPK	File6004 Spectrum424588 scans: 4878
17	Garb_12714	MYQGAGGDMGGGMDEDVPAGGSGAGPK	File5987 Spectrum25635 scans: 5088
17	Garb_12714	SINPDEAVAYGAAVQAAILSGEGNEK	File6002 Spectrum390039 scans: 16839
17	Garb_12714	SINPDEAVAYGAAVQAAILSGEGNEK	File6002 Spectrum390025 scans: 16825
17	Garb_12714	EQVFSTYSDNQPGVLIQVYEGER	File5989 Spectrum81279 scans: 14805
17	Garb_12714	EQVFSTYSDNQPGVLIQVYEGER	File5989 Spectrum80725 scans: 14214
17	Garb_12714	EQVFSTYSDNQPGVLIQVYEGER	File5990 Spectrum104402 scans: 14121
18	Garb_21426	DAGVIAGLNVMR	File6003 Spectrum408838 scans: 12506
18	Garb_21426	DAGVIAGLNVMR	File6002 Spectrum385787 scans: 12304
18	Garb_21426	DAGVIAGLNVMR	File6002 Spectrum385823 scans: 12342
18	Garb_21426	DAGVIAGLNVMR	File6002 Spectrum383410 scans: 9769
18	Garb_21426	FEELNMDLFR	File6001 Spectrum367081 scans: 16858
18	Garb_21426	NALENYAYNMR	File6002 Spectrum383819 scans: 10205
18	Garb_21426	NALENYAYNMR	File6002 Spectrum383950 scans: 10345
18	Garb_21426	NALENYAYNMR	File6002 Spectrum381558 scans: 7793
18	Garb_21426	NALENYAYNMR	File6002 Spectrum381530 scans: 7763
18	Garb_21426	SSVHDVVLVGGSTR	File5989 Spectrum73784 scans: 6810
18	Garb_21426	TTPSYVAFTDSER	File6000 Spectrum336714 scans: 8665
18	Garb_21426	EIAEAYLGATIK	File6005 Spectrum455002 scans: 12927
18	Garb_21426	EIAEAYLGATIK	File6005 Spectrum454998 scans: 12923
18	Garb_21426	EIAEAYLGATIK	File6004 Spectrum432147 scans: 12941
18	Garb_21426	EIAEAYLGATIK	File6004 Spectrum432173 scans: 12969
18	Garb_21426	ATAGDTHLGGEDFDNR	File5988 Spectrum49506 scans: 5816
18	Garb_21426	ATAGDTHLGGEDFDNR	File5989 Spectrum72596 scans: 5543
18	Garb_21426	NAVVTVPAYFNDSQR	File6001 Spectrum362050 scans: 11492
18	Garb_21426	NAVVTVPAYFNDSQR	File6001 Spectrum362130 scans: 11577
18	Garb_21426	NAVVTVPAYFNDSQR	File6001 Spectrum361992 scans: 11430
18	Garb_21426	QFAAEEISSMVLIK	File6005 Spectrum457747 scans: 15855
18	Garb_21426	IINEPTAAAIAYGLDK	File6005 Spectrum456465 scans: 14488
18	Garb_21426	IINEPTAAAIAYGLDK	File6004 Spectrum433653 scans: 14548
18	Garb_21426	IINEPTAAAIAYGLDK	File6004 Spectrum433525 scans: 14411
18	Garb_21426	IINEPTAAAIAYGLDK	File6004 Spectrum433536 scans: 14423
18	Garb_21426	NQVAMNPINTVFDAK	File5987 Spectrum33573 scans: 13555
18	Garb_21426	NQVAMNPINTVFDAK	File5987 Spectrum33562 scans: 13544
18	Garb_21426	NQVAMNPINTVFDAK	File5987 Spectrum32336 scans: 12236
18	Garb_21426	NQVAMNPINTVFDAK	File5988 Spectrum55542 scans: 12255
18	Garb_21426	VIAGPGDKPMIVVTYK	File5998 Spectrum294280 scans: 12475
18	Garb_21426	VIAGPGDKPMIVVTYK	File5998 Spectrum294239 scans: 12431
18	Garb_21426	EQVFSTYSDNQPGVLIQVYEGER	File5997 Spectrum273095 scans: 14517
18	Garb_21426	EQVFSTYSDNQPGVLIQVYEGER	File5997 Spectrum273077 scans: 14497
18	Garb_21426	EQVFSTYSDNQPGVLIQVYEGER	File5997 Spectrum272964 scans: 14377
18	Garb_21426	EQVFSTYSDNQPGVLIQVYEGER	File5999 Spectrum319830 scans: 14682
18	Garb_21426	EQVFSTYSDNQPGVLIQVYEGER	File5997 Spectrum272955 scans: 14367
18	Garb_21426	SINPDEAVAYGAAVQAAILSGEGNEK	File6002 Spectrum390039 scans: 16839
18	Garb_21426	SINPDEAVAYGAAVQAAILSGEGNEK	File6002 Spectrum390025 scans: 16825
18	Garb_21426	MYQGAGADMGGGMDEDAPPTGGSSAGPK	File6004 Spectrum427767 scans: 8269
18	Garb_21426	MYQGAGADMGGGMDEDAPPTGGSSAGPK	File6004 Spectrum427770 scans: 8272
18	Garb_21426	MYQGAGADMGGGMDEDAPPTGGSSAGPK	File6004 Spectrum426676 scans: 7105
18	Garb_21426	MYQGAGADMGGGMDEDAPPTGGSSAGPK	File6004 Spectrum426346 scans: 6753
18	Garb_21426	MYQGAGADMGGGMDEDAPPTGGSSAGPK	File6004 Spectrum425241 scans: 5575
18	Garb_21426	MYQGAGADMGGGMDEDAPPTGGSSAGPK	File6004 Spectrum425568 scans: 5924
18	Garb_21426	MYQGAGADMGGGMDEDAPPTGGSSAGPK	File6004 Spectrum425567 scans: 5923
18	Garb_21426	MYQGAGADMGGGMDEDAPPTGGSSAGPK	File6004 Spectrum425445 scans: 5792
18	Garb_21426	MYQGAGADMGGGMDEDAPPTGGSSAGPK	File6004 Spectrum425435 scans: 5782
18	Garb_21426	EQVFSTYSDNQPGVLIQVYEGER	File5989 Spectrum81279 scans: 14805
18	Garb_21426	EQVFSTYSDNQPGVLIQVYEGER	File5989 Spectrum80725 scans: 14214
18	Garb_21426	EQVFSTYSDNQPGVLIQVYEGER	File5990 Spectrum104402 scans: 14121
18	Garb_21426	MYQGAGADMGGGMDEDAPPTGGSSAGPK	File6005 Spectrum447293 scans: 4704
18	Garb_21426	MYQGAGADMGGGMDEDAPPTGGSSAGPK	File6004 Spectrum424225 scans: 4491
19	cotton_GLEAN_10000235	DAGVIAGLNVMR	File6003 Spectrum408838 scans: 12506
19	cotton_GLEAN_10000235	DAGVIAGLNVMR	File6002 Spectrum385787 scans: 12304
19	cotton_GLEAN_10000235	DAGVIAGLNVMR	File6002 Spectrum385823 scans: 12342
19	cotton_GLEAN_10000235	DAGVIAGLNVMR	File6002 Spectrum383410 scans: 9769
19	cotton_GLEAN_10000235	FEELNMDLFR	File6001 Spectrum367081 scans: 16858
19	cotton_GLEAN_10000235	NSLENYAYNMR	File6002 Spectrum383322 scans: 9675
19	cotton_GLEAN_10000235	NSLENYAYNMR	File6002 Spectrum380940 scans: 7134
19	cotton_GLEAN_10000235	SSVHDVVLVGGSTR	File5989 Spectrum73784 scans: 6810
19	cotton_GLEAN_10000235	TTPSYVAFTDSER	File6000 Spectrum336714 scans: 8665
19	cotton_GLEAN_10000235	EIAEAYLGATIK	File6005 Spectrum455002 scans: 12927
19	cotton_GLEAN_10000235	EIAEAYLGATIK	File6005 Spectrum454998 scans: 12923
19	cotton_GLEAN_10000235	EIAEAYLGATIK	File6004 Spectrum432147 scans: 12941
19	cotton_GLEAN_10000235	EIAEAYLGATIK	File6004 Spectrum432173 scans: 12969
19	cotton_GLEAN_10000235	ATAGDTHLGGEDFDNR	File5988 Spectrum49506 scans: 5816
19	cotton_GLEAN_10000235	ATAGDTHLGGEDFDNR	File5989 Spectrum72596 scans: 5543
19	cotton_GLEAN_10000235	NAVVTVPAYFNDSQR	File6001 Spectrum362050 scans: 11492
19	cotton_GLEAN_10000235	NAVVTVPAYFNDSQR	File6001 Spectrum362130 scans: 11577
19	cotton_GLEAN_10000235	NAVVTVPAYFNDSQR	File6001 Spectrum361992 scans: 11430
19	cotton_GLEAN_10000235	QFAAEEISSMVLIK	File6005 Spectrum457747 scans: 15855
19	cotton_GLEAN_10000235	IINEPTAAAIAYGLDK	File6005 Spectrum456465 scans: 14488
19	cotton_GLEAN_10000235	IINEPTAAAIAYGLDK	File6004 Spectrum433653 scans: 14548
19	cotton_GLEAN_10000235	IINEPTAAAIAYGLDK	File6004 Spectrum433525 scans: 14411
19	cotton_GLEAN_10000235	IINEPTAAAIAYGLDK	File6004 Spectrum433536 scans: 14423
19	cotton_GLEAN_10000235	NQVAMNPINTVFDAK	File5987 Spectrum33573 scans: 13555
19	cotton_GLEAN_10000235	NQVAMNPINTVFDAK	File5987 Spectrum33562 scans: 13544
19	cotton_GLEAN_10000235	NQVAMNPINTVFDAK	File5987 Spectrum32336 scans: 12236
19	cotton_GLEAN_10000235	NQVAMNPINTVFDAK	File5988 Spectrum55542 scans: 12255
19	cotton_GLEAN_10000235	VIAGPGDKPMIVVTYK	File5998 Spectrum294280 scans: 12475
19	cotton_GLEAN_10000235	VIAGPGDKPMIVVTYK	File5998 Spectrum294239 scans: 12431
19	cotton_GLEAN_10000235	EQVFSTYSDNQPGVLIQVYEGER	File5997 Spectrum273095 scans: 14517
19	cotton_GLEAN_10000235	EQVFSTYSDNQPGVLIQVYEGER	File5997 Spectrum273077 scans: 14497
19	cotton_GLEAN_10000235	EQVFSTYSDNQPGVLIQVYEGER	File5997 Spectrum272964 scans: 14377
19	cotton_GLEAN_10000235	EQVFSTYSDNQPGVLIQVYEGER	File5999 Spectrum319830 scans: 14682
19	cotton_GLEAN_10000235	EQVFSTYSDNQPGVLIQVYEGER	File5997 Spectrum272955 scans: 14367
19	cotton_GLEAN_10000235	SINPDEAVAYGAAVQAAILSGEGNEK	File6002 Spectrum390039 scans: 16839
19	cotton_GLEAN_10000235	SINPDEAVAYGAAVQAAILSGEGNEK	File6002 Spectrum390025 scans: 16825
19	cotton_GLEAN_10000235	MYQGAGADMGGGMDEDAPPTGGSGAGPK	File6005 Spectrum449237 scans: 6778
19	cotton_GLEAN_10000235	MYQGAGADMGGGMDEDAPPTGGSGAGPK	File6005 Spectrum449250 scans: 6792
19	cotton_GLEAN_10000235	MYQGAGADMGGGMDEDAPPTGGSGAGPK	File6004 Spectrum426755 scans: 7190
19	cotton_GLEAN_10000235	MYQGAGADMGGGMDEDAPPTGGSGAGPK	File6005 Spectrum449433 scans: 6987
19	cotton_GLEAN_10000235	MYQGAGADMGGGMDEDAPPTGGSGAGPK	File6004 Spectrum426605 scans: 7030
19	cotton_GLEAN_10000235	MYQGAGADMGGGMDEDAPPTGGSGAGPK	File6005 Spectrum448456 scans: 5945
19	cotton_GLEAN_10000235	MYQGAGADMGGGMDEDAPPTGGSGAGPK	File6004 Spectrum425566 scans: 5921
19	cotton_GLEAN_10000235	MYQGAGADMGGGMDEDAPPTGGSGAGPK	File6005 Spectrum448441 scans: 5929
19	cotton_GLEAN_10000235	MYQGAGADMGGGMDEDAPPTGGSGAGPK	File6005 Spectrum447325 scans: 4738
19	cotton_GLEAN_10000235	MYQGAGADMGGGMDEDAPPTGGSGAGPK	File6005 Spectrum447334 scans: 4748
19	cotton_GLEAN_10000235	EQVFSTYSDNQPGVLIQVYEGER	File5989 Spectrum81279 scans: 14805
19	cotton_GLEAN_10000235	EQVFSTYSDNQPGVLIQVYEGER	File5989 Spectrum80725 scans: 14214
19	cotton_GLEAN_10000235	EQVFSTYSDNQPGVLIQVYEGER	File5990 Spectrum104402 scans: 14121
20	Garb_13496	LFIGGISWETSEDR	File6001 Spectrum365930 scans: 15630
20	Garb_13496	LFIGGISWETSEDR	File6001 Spectrum366064 scans: 15773
20	Garb_13496	LFIGGISWETSEDR	File6002 Spectrum388536 scans: 15236
20	Garb_13496	LFIGGISWETSEDR	File6001 Spectrum365923 scans: 15623
20	Garb_13496	GFGFISFDSEEAVDR	File6000 Spectrum342700 scans: 15050
20	Garb_13496	GFGFISFDSEEAVDR	File6000 Spectrum342580 scans: 14922
20	Garb_13496	GFGFISFDSEEAVDR	File6000 Spectrum342561 scans: 14902
20	Garb_13496	GFGFISFDSEEAVDR	File6000 Spectrum342260 scans: 14581
20	Garb_13496	GFGFISFDSEEAVDR	File6000 Spectrum342179 scans: 14494
20	Garb_13496	GFGFISFDSEEAVDR	File6001 Spectrum365233 scans: 14887
20	Garb_13496	GFGFISFDSEEAVDR	File6001 Spectrum365753 scans: 15442
20	Garb_13496	GFGFISFDSEEAVDR	File6000 Spectrum342128 scans: 14440
20	Garb_13496	IFVGGLPPTLTEDGFR	File6001 Spectrum366623 scans: 16370
20	Garb_13496	IFVGGLPPTLTEDGFR	File6002 Spectrum389335 scans: 16089
20	Garb_13496	IFVGGLPPTLTEDGFR	File6001 Spectrum366861 scans: 16623
20	Garb_13496	IFVGGLPPTLTEDGFR	File6002 Spectrum389242 scans: 15989
20	Garb_13496	IFVGGLPPTLTEDGFR	File6001 Spectrum366833 scans: 16594
20	Garb_13496	IFVGGLPPTLTEDGFR	File6001 Spectrum366713 scans: 16466
20	Garb_13496	IFVGGLPPTLTEDGFR	File6001 Spectrum366579 scans: 16323
20	Garb_13496	EYFGQYGDILQTVVMR	File5999 Spectrum321863 scans: 16850
20	Garb_13496	EYFGQYGDILQTVVMR	File5999 Spectrum321855 scans: 16842
20	Garb_13496	EYFGQYGDILQTVVMR	File5999 Spectrum320765 scans: 15679
20	Garb_13496	EYFGQYGDILQTVVMR	File5999 Spectrum320761 scans: 15675
20	Garb_13496	GFGFVVFSDPSVIDTVLQEK	File6003 Spectrum414908 scans: 18981
20	Garb_13496	GFGFVVFSDPSVIDTVLQEK	File6003 Spectrum414812 scans: 18878
20	Garb_13496	GFGFVVFSDPSVIDTVLQEK	File6003 Spectrum414784 scans: 18848
20	Garb_13496	SMGGGAGGFGGYQGYGSSGGNSSSYDGR	File6000 Spectrum336187 scans: 8103
20	Garb_13496	SMGGGAGGFGGYQGYGSSGGNSSSYDGR	File6001 Spectrum358047 scans: 7222
20	Garb_13496	SMGGGAGGFGGYQGYGSSGGNSSSYDGR	File6000 Spectrum335215 scans: 7066
20	Garb_13496	SMGGGAGGFGGYQGYGSSGGNSSSYDGR	File5992 Spectrum147738 scans: 8048
21	Garb_26457	AGIALNDNFVK	File5990 Spectrum101575 scans: 11106
21	Garb_26457	AGIALNDNFVK	File5989 Spectrum77836 scans: 11133
21	Garb_26457	AGIALNDNFVK	File5989 Spectrum77853 scans: 11151
21	Garb_26457	AGIALNDNFVK	File5990 Spectrum101587 scans: 11119
21	Garb_26457	VPTVDVSVVDLTVR	File6000 Spectrum341869 scans: 14163
21	Garb_26457	VPTVDVSVVDLTVR	File6000 Spectrum341975 scans: 14277
21	Garb_26457	DAPMFVVGVNEK	File5988 Spectrum54629 scans: 11281
21	Garb_26457	DAPMFVVGVNEK	File5987 Spectrum31579 scans: 11429
21	Garb_26457	DAPMFVVGVNEK	File5987 Spectrum31580 scans: 11430
21	Garb_26457	DAPMFVVGVNEK	File5987 Spectrum31455 scans: 11296
21	Garb_26457	DAPMFVVGVNEK	File5987 Spectrum31610 scans: 11462
21	Garb_26457	DAPMFVVGVNEK	File6005 Spectrum453394 scans: 11212
21	Garb_26457	DAPMFVVGVNEK	File5987 Spectrum31482 scans: 11325
21	Garb_26457	DAPMFVVGVNEK	File5988 Spectrum53010 scans: 9554
21	Garb_26457	DAPMFVVGVNEK	File5987 Spectrum29826 scans: 9559
21	Garb_26457	DAPMFVVGVNEK	File5988 Spectrum53021 scans: 9566
21	Garb_26457	DAPMFVVGVNEK	File5987 Spectrum29799 scans: 9530
21	Garb_26457	AASFNIIPSSTGAAK	File5988 Spectrum54367 scans: 11002
21	Garb_26457	AASFNIIPSSTGAAK	File5989 Spectrum78075 scans: 11387
21	Garb_26457	AASFNIIPSSTGAAK	File5988 Spectrum54224 scans: 10849
21	Garb_26457	AASFNIIPSSTGAAK	File5988 Spectrum54382 scans: 11018
21	Garb_26457	AASFNIIPSSTGAAK	File5988 Spectrum54250 scans: 10877
21	Garb_26457	LVTWYDNEWGYSSR	File6001 Spectrum366161 scans: 15877
21	Garb_26457	GILGYVDEDLVSTDFIGDNR	File5997 Spectrum275759 scans: 17358
21	Garb_26457	GILGYVDEDLVSTDFIGDNR	File5997 Spectrum275618 scans: 17208
21	Garb_26457	GILGYVDEDLVSTDFIGDNR	File5997 Spectrum275671 scans: 17264
21	Garb_26457	GILGYVDEDLVSTDFIGDNR	File5997 Spectrum275749 scans: 17348
21	Garb_26457	GILGYVDEDLVSTDFIGDNR	File5999 Spectrum322561 scans: 17595
21	Garb_26457	GILGYVDEDLVSTDFIGDNR	File5997 Spectrum275626 scans: 17216
21	Garb_26457	GILGYVDEDLVSTDFIGDNR	File5999 Spectrum322560 scans: 17594
21	Garb_26457	FGIVEGLMTTVHSITATQK	File5991 Spectrum134814 scans: 20697
21	Garb_26457	GILGYVDEDLVSTDFIGDNR	File5990 Spectrum106616 scans: 16483
21	Garb_26457	GILGYVDEDLVSTDFIGDNR	File5991 Spectrum132028 scans: 17725
21	Garb_26457	NPEEIPWAEAGAEYVVESTGVFTDK	File6001 Spectrum369106 scans: 19018
22	Garb_05010	GAETVAIVNR	File6002 Spectrum379851 scans: 5972
22	Garb_05010	YFSNLQNQR	File6004 Spectrum427622 scans: 8115
22	Garb_05010	GLLQTDQELFSTK	File5987 Spectrum33067 scans: 13016
22	Garb_05010	GLLQTDQELFSTK	File5988 Spectrum56231 scans: 12990
22	Garb_05010	GLLQTDQELFSTK	File5988 Spectrum56276 scans: 13038
22	Garb_05010	GLLQTDQELFSTK	File5987 Spectrum33006 scans: 12951
22	Garb_05010	FASSQSQFFSSFAK	File5988 Spectrum57258 scans: 14085
22	Garb_05010	FASSQSQFFSSFAK	File5988 Spectrum57321 scans: 14152
22	Garb_05010	SVGLDSTDLVALSGVHTFGR	File5987 Spectrum34417 scans: 14456
22	Garb_05010	SVGLDSTDLVALSGVHTFGR	File5987 Spectrum34291 scans: 14321
22	Garb_05010	SVGLDSTDLVALSGVHTFGR	File6005 Spectrum456252 scans: 14261
22	Garb_05010	SVGLDSTDLVALSGVHTFGR	File6005 Spectrum456196 scans: 14201
22	Garb_05010	SVGLDSTDLVALSGVHTFGR	File6005 Spectrum456388 scans: 14406
22	Garb_05010	SVGLDSTDLVALSGVHTFGR	File5987 Spectrum34297 scans: 14328
22	Garb_05010	SVGLDSTDLVALSGVHTFGR	File5987 Spectrum34432 scans: 14472
22	Garb_05010	SLIDLDEQSSLTFDNK	File6004 Spectrum432730 scans: 13563
22	Garb_05010	SLIDLDEQSSLTFDNK	File6003 Spectrum409573 scans: 13290
22	Garb_05010	SLIDLDEQSSLTFDNK	File6003 Spectrum409854 scans: 13590
22	Garb_05010	SLIDLDEQSSLTFDNK	File6004 Spectrum432543 scans: 13364
22	Garb_05010	SLIDLDEQSSLTFDNK	File6004 Spectrum432420 scans: 13232
22	Garb_05010	SLIDLDEQSSLTFDNK	File6004 Spectrum432466 scans: 13281
22	Garb_05010	SLIDLDEQSSLTFDNK	File6003 Spectrum409586 scans: 13304
22	Garb_05010	TATPNLSTEGYEVIDDIK	File6003 Spectrum410207 scans: 13966
22	Garb_05010	TATPNLSTEGYEVIDDIK	File6003 Spectrum410067 scans: 13817
22	Garb_05010	TATPNLSTEGYEVIDDIK	File6002 Spectrum387239 scans: 13853
22	Garb_05010	TATPNLSTEGYEVIDDIK	File6003 Spectrum410047 scans: 13795
22	Garb_05010	TATPNLSTEGYEVIDDIK	File6004 Spectrum433064 scans: 13919
22	Garb_05010	TATPNLSTEGYEVIDDIK	File6003 Spectrum410170 scans: 13927
22	Garb_05010	EGTGSIPTGHESLANIATLFK	File5990 Spectrum105449 scans: 15238
22	Garb_05010	EGTGSIPTGHESLANIATLFK	File5990 Spectrum105450 scans: 15239
23	Garb_04100	EIEGAVADLR	File6001 Spectrum361855 scans: 11284
23	Garb_04100	EIEGAVADLR	File6001 Spectrum361584 scans: 10995
23	Garb_04100	EIEGAVADLR	File6001 Spectrum361449 scans: 10851
23	Garb_04100	EIEGAVADLR	File6001 Spectrum361721 scans: 11141
23	Garb_04100	ETAEAYLGK	File5987 Spectrum28374 scans: 8010
23	Garb_04100	GELLVGTPAK	File5989 Spectrum75940 scans: 9110
23	Garb_04100	QAVTNPTNTVFGTK	File5986 Spectrum6969 scans: 9829
23	Garb_04100	VQEVVSGIFGK	File5988 Spectrum59426 scans: 16398
23	Garb_04100	VQEVVSGIFGK	File5988 Spectrum59462 scans: 16436
23	Garb_04100	TTPSVVAFNQK	File5989 Spectrum75402 scans: 8536
23	Garb_04100	TTPSVVAFNQK	File5989 Spectrum75396 scans: 8530
23	Garb_04100	SSGGLSEDEIEK	File6005 Spectrum448764 scans: 6273
23	Garb_04100	SSGGLSEDEIEK	File6005 Spectrum448778 scans: 6288
23	Garb_04100	AVITVPAYFNDAQR	File6001 Spectrum363518 scans: 13058
23	Garb_04100	AVITVPAYFNDAQR	File6001 Spectrum363422 scans: 12955
23	Garb_04100	NNADTTIYSVEK	File6005 Spectrum449484 scans: 7041
23	Garb_04100	NNADTTIYSVEK	File6005 Spectrum449529 scans: 7089
23	Garb_04100	QAVTNPTNTVFGTK	File5989 Spectrum75839 scans: 9002
23	Garb_04100	QAVTNPTNTVFGTK	File5989 Spectrum75830 scans: 8993
23	Garb_04100	QAVTNPTNTVFGTK	File5988 Spectrum52539 scans: 9052
23	Garb_04100	QAVTNPTNTVFGTK	File5988 Spectrum52435 scans: 8941
23	Garb_04100	GVNPDEAVAMGAAIQGGILR	File6001 Spectrum365793 scans: 15484
23	Garb_04100	GVNPDEAVAMGAAIQGGILR	File6001 Spectrum365801 scans: 15493
23	Garb_04100	GVNPDEAVAMGAAIQGGILR	File6001 Spectrum362996 scans: 12501
23	Garb_04100	DAGISTNDVDEVLLVGGMTR	File5997 Spectrum273082 scans: 14503
23	Garb_04100	DAGISTNDVDEVLLVGGMTR	File5999 Spectrum320001 scans: 14864
23	Garb_04100	DAGISTNDVDEVLLVGGMTR	File5999 Spectrum319981 scans: 14843
23	Garb_04100	DAGISTNDVDEVLLVGGMTR	File5997 Spectrum273089 scans: 14510
23	Garb_04100	SQVFSTAADNQTQVGIK	File6005 Spectrum451638 scans: 9339
23	Garb_04100	SQVFSTAADNQTQVGIK	File6005 Spectrum451768 scans: 9478
23	Garb_04100	SQVFSTAADNQTQVGIK	File5987 Spectrum29801 scans: 9532
23	Garb_04100	SQVFSTAADNQTQVGIK	File6005 Spectrum451776 scans: 9486
23	Garb_04100	IINEPTAAALSYGMNNK	File6005 Spectrum454644 scans: 12545
23	Garb_04100	IELSSTSQTEINLPFITADASGAK	File6002 Spectrum388944 scans: 15671
24	Garb_01661	EGLELLK	File5988 Spectrum54031 scans: 10643
24	Garb_01661	IEEELGAAAVYAGAK	File6004 Spectrum433438 scans: 14318
24	Garb_01661	AAVPSGASTGIYEALELR	File6000 Spectrum341700 scans: 13983
24	Garb_01661	AAVPSGASTGIYEALELR	File6000 Spectrum341812 scans: 14103
24	Garb_01661	AAVPSGASTGIYEALELR	File6000 Spectrum341805 scans: 14095
24	Garb_01661	AAVPSGASTGIYEALELR	File6001 Spectrum364858 scans: 14487
24	Garb_01661	AAVPSGASTGIYEALELR	File6000 Spectrum341669 scans: 13950
24	Garb_01661	VNQIGSVTESIEAVK	File6005 Spectrum455054 scans: 12983
24	Garb_01661	VNQIGSVTESIEAVK	File5987 Spectrum33134 scans: 13087
24	Garb_01661	VNQIGSVTESIEAVK	File6005 Spectrum455188 scans: 13126
24	Garb_01661	VNQIGSVTESIEAVK	File6005 Spectrum455026 scans: 12953
24	Garb_01661	VNQIGSVTESIEAVK	File5987 Spectrum33142 scans: 13096
24	Garb_01661	VNQIGSVTESIEAVK	File6005 Spectrum455158 scans: 13094
24	Garb_01661	AVENVNTIIGPALVGK	File5987 Spectrum34243 scans: 14270
24	Garb_01661	VVIGMDVAASEFYDNK	File6004 Spectrum435079 scans: 16069
24	Garb_01661	AAVPSGASTGIYEALELR	File5993 Spectrum176187 scans: 13399
24	Garb_01661	LAMQEFMILPVGASSFK	File6005 Spectrum459795 scans: 18040
24	Garb_01661	LAMQEFMILPVGASSFK	File6005 Spectrum459788 scans: 18032
24	Garb_01661	LAMQEFMILPVGASSFK	File6005 Spectrum457991 scans: 16115
24	Garb_01661	LAMQEFMILPVGASSFK	File6005 Spectrum458329 scans: 16476
24	Garb_01661	LAMQEFMILPVGASSFK	File5987 Spectrum36502 scans: 16680
24	Garb_01661	LAMQEFMILPVGASSFK	File5987 Spectrum36088 scans: 16238
24	Garb_01661	SGETEDTFIADLSVGLATGQIK	File6003 Spectrum413586 scans: 17570
24	Garb_01661	SGETEDTFIADLSVGLATGQIK	File6002 Spectrum390667 scans: 17509
24	Garb_01661	SGETEDTFIADLSVGLATGQIK	File6002 Spectrum390533 scans: 17366
24	Garb_01661	YGQDATNVGDEGGFAPNIQENK	File6004 Spectrum428629 scans: 9189
24	Garb_01661	YGQDATNVGDEGGFAPNIQENK	File6003 Spectrum405742 scans: 9203
24	Garb_01661	YGQDATNVGDEGGFAPNIQENK	File6003 Spectrum405723 scans: 9183
24	Garb_01661	YGQDATNVGDEGGFAPNIQENK	File6003 Spectrum405890 scans: 9361
24	Garb_01661	YGQDATNVGDEGGFAPNIQENK	File6002 Spectrum382948 scans: 9276
24	Garb_01661	MTSEIGEQVQIVGDDLLVTNPK	File6002 Spectrum389900 scans: 16691
24	Garb_01661	YGQDATNVGDEGGFAPNIQENK	File5996 Spectrum244670 scans: 9665
24	Garb_01661	KYGQDATNVGDEGGFAPNIQENK	File5996 Spectrum244264 scans: 9232
25	Garb_32668	VACGIIGLQG	File5986 Spectrum9212 scans: 12221
25	Garb_32668	QIPLSGPHSIIGR	File6001 Spectrum362573 scans: 12050
25	Garb_32668	QIPLSGPHSIIGR	File6001 Spectrum362446 scans: 11914
25	Garb_32668	QIPLSGPHSIIGR	File6000 Spectrum339433 scans: 11565
25	Garb_32668	QIPLSGPHSIIGR	File6001 Spectrum362538 scans: 12012
25	Garb_32668	QIPLSGPHSIIGR	File5993 Spectrum172763 scans: 9747
25	Garb_32668	AVVVHADPDDLGK	File5994 Spectrum194002 scans: 7317
25	Garb_32668	AVVVHADPDDLGK	File5994 Spectrum194873 scans: 8246
25	Garb_32668	AVVVHADPDDLGK	File5993 Spectrum171196 scans: 8076
25	Garb_32668	AVVVHADPDDLGK	File5993 Spectrum171066 scans: 7937
25	Garb_32668	AVVVHADPDDLGK	File5994 Spectrum194629 scans: 7986
25	Garb_32668	AVVVHADPDDLGK	File5994 Spectrum194695 scans: 8056
25	Garb_32668	AVVVHADPDDLGK	File5994 Spectrum194598 scans: 7953
25	Garb_32668	AVVVHADPDDLGK	File5994 Spectrum194899 scans: 8274
25	Garb_32668	AVVVHADPDDLGK	File5994 Spectrum194768 scans: 8134
25	Garb_32668	AVVVHADPDDLGK	File5993 Spectrum171102 scans: 7975
25	Garb_32668	AVVVHADPDDLGK	File5993 Spectrum171343 scans: 8232
25	Garb_32668	AVVVHADPDDLGK	File5993 Spectrum171210 scans: 8091
25	Garb_32668	AVVVHADPDDLGK	File5993 Spectrum171072 scans: 7943
25	Garb_32668	AVVVHADPDDLGK	File5995 Spectrum219031 scans: 8535
25	Garb_32668	AVVVHADPDDLGK	File5995 Spectrum219163 scans: 8676
25	Garb_32668	HAGDLGNVTVGADGSASFSIVDK	File5994 Spectrum198096 scans: 11684
25	Garb_32668	HAGDLGNVTVGADGSASFSIVDK	File5993 Spectrum174583 scans: 11688
25	Garb_32668	HAGDLGNVTVGADGSASFSIVDK	File5991 Spectrum127563 scans: 12963
25	Garb_32668	HAGDLGNVTVGADGSASFSIVDK	File5992 Spectrum150997 scans: 11524
25	Garb_32668	HAGDLGNVTVGADGSASFSIVDK	File5991 Spectrum127833 scans: 13251
25	Garb_32668	HAGDLGNVTVGADGSASFSIVDK	File5991 Spectrum127564 scans: 12964
25	Garb_32668	HAGDLGNVTVGADGSASFSIVDK	File5992 Spectrum150860 scans: 11378
25	Garb_32668	HAGDLGNVTVGADGSASFSIVDK	File5991 Spectrum127707 scans: 13116
25	Garb_32668	HAGDLGNVTVGADGSASFSIVDK	File5992 Spectrum151454 scans: 12012
26	Garb_32724	APTLAAPLLR	File6005 Spectrum453650 scans: 11485
26	Garb_32724	APTLAAPLLR	File6005 Spectrum453603 scans: 11435
26	Garb_32724	APTLAAPLLR	File5987 Spectrum31844 scans: 11711
26	Garb_32724	DFAESMVK	File5988 Spectrum52357 scans: 8858
26	Garb_32724	DFAESMVK	File5987 Spectrum29053 scans: 8734
26	Garb_32724	EHIPNAPSLAASFIR	File5991 Spectrum129047 scans: 14546
26	Garb_32724	EHIPNAPSLAASFIR	File5992 Spectrum152400 scans: 13021
26	Garb_32724	EHIPNAPSLAASFIR	File5990 Spectrum103466 scans: 13123
26	Garb_32724	EHIPNAPSLAASFIR	File5991 Spectrum128941 scans: 14433
26	Garb_32724	EHIPNAPSLAASFIR	File5991 Spectrum128857 scans: 14343
26	Garb_32724	EHIPNAPSLAASFIR	File5991 Spectrum128911 scans: 14401
26	Garb_32724	DSVSMIHGPYWK	File5994 Spectrum197422 scans: 10965
26	Garb_32724	TFDEAYYTLVAK	File6004 Spectrum433187 scans: 14051
26	Garb_32724	DSVSMIHGPYWK	File5994 Spectrum195831 scans: 9268
26	Garb_32724	TFDLSYYTLLTK	File6004 Spectrum434765 scans: 15734
26	Garb_32724	DTTALVEMDPGSFK	File6004 Spectrum431307 scans: 12045
26	Garb_32724	DTTALVEMDPGSFK	File6004 Spectrum431331 scans: 12071
26	Garb_32724	DSIVTVGGPFWQVPTGR	File6000 Spectrum342545 scans: 14885
26	Garb_32724	DSIVTVGGPFWQVPTGR	File6002 Spectrum388241 scans: 14922
26	Garb_32724	DSIVTVGGPFWQVPTGR	File6001 Spectrum365680 scans: 15364
26	Garb_32724	DSIVTVGGPFWQVPTGR	File6001 Spectrum365543 scans: 15218
26	Garb_32724	DSIVTVGGPFWQVPTGR	File6000 Spectrum342575 scans: 14917
26	Garb_32724	DSIVTVGGPFWQVPTGR	File6001 Spectrum365678 scans: 15362
26	Garb_32724	DSIVTVGGPFWQVPTGR	File6001 Spectrum365421 scans: 15087
26	Garb_32724	DSIVTVGGPFWQVPTGR	File6001 Spectrum365412 scans: 15078
26	Garb_32724	DSIVTVGGPFWQVPTGR	File6002 Spectrum388184 scans: 14861
26	Garb_32724	DSIVTVGGPFWQVPTGR	File6000 Spectrum342444 scans: 14777
26	Garb_32724	DTTALVEMDPGSFK	File6004 Spectrum428761 scans: 9329
26	Garb_32724	DTTALVEMDPGSFK	File6004 Spectrum428788 scans: 9358
26	Garb_32724	DTTALVEMDPGSFK	File6005 Spectrum451793 scans: 9504
26	Garb_32724	DTTALVEMDPGSFK	File6005 Spectrum451786 scans: 9497
26	Garb_32724	GDTDPSMDPNYIVK	File6004 Spectrum428269 scans: 8805
26	Garb_32724	GDTDPSMDPNYIVK	File6004 Spectrum428283 scans: 8820
26	Garb_32724	GDTDPSMDPNYIVK	File6004 Spectrum428148 scans: 8676
26	Garb_32724	GDTDPSMDPNYIVK	File6005 Spectrum449306 scans: 6851
26	Garb_32724	GDTDPSMDPNYIVK	File6004 Spectrum426448 scans: 6862
26	Garb_32724	GDTDPSMDPNYIVK	File6004 Spectrum426527 scans: 6947
26	Garb_32724	GDTDPSMDPNYIVK	File6004 Spectrum426557 scans: 6979
26	Garb_32724	GDTDPSMDPNYIVK	File6005 Spectrum449325 scans: 6872
26	Garb_32724	GLFQSDSALLDDPETK	File6004 Spectrum431967 scans: 12749
26	Garb_32724	GLFQSDSALLDDPETK	File6004 Spectrum431962 scans: 12744
26	Garb_32724	GLFQSDSALLDDPETK	File6005 Spectrum454795 scans: 12706
26	Garb_32724	GLFQSDSALLDDPETK	File6005 Spectrum454822 scans: 12735
27	Garb_10751	AIDDAEGIVK	File5987 Spectrum29670 scans: 9392
27	Garb_10751	AIDDAEGIVK	File5987 Spectrum29683 scans: 9406
27	Garb_10751	SLPGITIDEK	File5989 Spectrum77480 scans: 10753
27	Garb_10751	SLPGITIDEK	File5988 Spectrum53864 scans: 10465
27	Garb_10751	SPFTAGLGLDK	File5990 Spectrum102515 scans: 12109
27	Garb_10751	SPFTAGLGLDK	File5989 Spectrum78870 scans: 12235
27	Garb_10751	NIIIATGSDVK	File5988 Spectrum52851 scans: 9384
27	Garb_10751	NIIIATGSDVK	File5987 Spectrum29701 scans: 9425
27	Garb_10751	NIIIATGSDVK	File5987 Spectrum29702 scans: 9426
27	Garb_10751	EAAMATYDKPIHI	File5992 Spectrum150492 scans: 10986
27	Garb_10751	EAAMATYDKPIHI	File5992 Spectrum150546 scans: 11043
27	Garb_10751	IVSSTGALALQEVPK	File6005 Spectrum455039 scans: 12967
27	Garb_10751	IVSSTGALALQEVPK	File6005 Spectrum455129 scans: 13063
27	Garb_10751	IVSSTGALALQEVPK	File6005 Spectrum454991 scans: 12915
27	Garb_10751	VPGVVYTHPEVASVGK	File5994 Spectrum196170 scans: 9629
27	Garb_10751	VPGVVYTHPEVASVGK	File5994 Spectrum196294 scans: 9762
27	Garb_10751	FSSVEIDLPAMMAQK	File6005 Spectrum457849 scans: 15964
27	Garb_10751	FSSVEIDLPAMMAQK	File6005 Spectrum457890 scans: 16008
27	Garb_10751	FISPSEVSVDTIEGGSTVVK	File6003 Spectrum409970 scans: 13713
27	Garb_10751	FISPSEVSVDTIEGGSTVVK	File6003 Spectrum409930 scans: 13671
27	Garb_10751	LTVEPAAGGDQTTLEADVVLVSAGR	File5997 Spectrum273072 scans: 14492
27	Garb_10751	LTVEPAAGGDQTTLEADVVLVSAGR	File5997 Spectrum273078 scans: 14498
27	Garb_10751	LTVEPAAGGDQTTLEADVVLVSAGR	File6000 Spectrum342702 scans: 15052
27	Garb_10751	LTVEPAAGGDQTTLEADVVLVSAGR	File5999 Spectrum320017 scans: 14881
27	Garb_10751	LTVEPAAGGDQTTLEADVVLVSAGR	File5999 Spectrum320042 scans: 14908
27	Garb_10751	LGSEVTVVEFAPDIVPSMDAEIR	File5997 Spectrum275702 scans: 17297
27	Garb_10751	LGSEVTVVEFAPDIVPSMDAEIR	File5997 Spectrum275632 scans: 17223
27	Garb_10751	LGSEVTVVEFAPDIVPSMDAEIR	File5997 Spectrum274094 scans: 15582
27	Garb_10751	FATNVAGVYAIGDVIPGPMLAHK	File5992 Spectrum155523 scans: 16352
28	Garb_26291	QLPGVLALNDA	File5986 Spectrum10467 scans: 13560
28	Garb_26291	FAAGTEAVAK	File5989 Spectrum74741 scans: 7831
28	Garb_26291	LSELLGVEVK	File5987 Spectrum35618 scans: 15737
28	Garb_26291	ELDYLVGAVANPK	File6004 Spectrum433850 scans: 14758
28	Garb_26291	MVAALPDGGVLLLENVR	File6001 Spectrum367998 scans: 17836
28	Garb_26291	MVAALPDGGVLLLENVR	File6000 Spectrum344828 scans: 17320
28	Garb_26291	MVAALPDGGVLLLENVR	File6000 Spectrum344834 scans: 17326
28	Garb_26291	GVSLLLPSDVVVADK	File6004 Spectrum433970 scans: 14886
28	Garb_26291	GVTTIIGGGDSVAAVEK	File6004 Spectrum430186 scans: 10849
28	Garb_26291	GVTTIIGGGDSVAAVEK	File5987 Spectrum31293 scans: 11123
28	Garb_26291	GVTTIIGGGDSVAAVEK	File6004 Spectrum430195 scans: 10859
28	Garb_26291	GVTTIIGGGDSVAAVEK	File6005 Spectrum453100 scans: 10898
28	Garb_26291	GVTTIIGGGDSVAAVEK	File6005 Spectrum453061 scans: 10857
28	Garb_26291	VDLNVPLDDNFNITDDTR	File5997 Spectrum272501 scans: 13883
28	Garb_26291	VDLNVPLDDNFNITDDTR	File5999 Spectrum319388 scans: 14210
28	Garb_26291	VDLNVPLDDNFNITDDTR	File5999 Spectrum319365 scans: 14186
28	Garb_26291	VDLNVPLDDNFNITDDTR	File5997 Spectrum272454 scans: 13833
28	Garb_26291	VVPASGIPDGWMGLDIGPDSIK	File6004 Spectrum435963 scans: 17012
28	Garb_26291	VVPASGIPDGWMGLDIGPDSIK	File6004 Spectrum435889 scans: 16933
28	Garb_26291	VVPASGIPDGWMGLDIGPDSIK	File6004 Spectrum435830 scans: 16870
28	Garb_26291	VVPASGIPDGWMGLDIGPDSIK	File6004 Spectrum435840 scans: 16880
28	Garb_26291	VVPASGIPDGWMGLDIGPDSIK	File6004 Spectrum434608 scans: 15566
28	Garb_26291	VVPASGIPDGWMGLDIGPDSIK	File6005 Spectrum457310 scans: 15389
29	Garb_34365	AQDAFLVR	File6003 Spectrum405280 scans: 8711
29	Garb_34365	AQDAFLVR	File6003 Spectrum405216 scans: 8642
29	Garb_34365	EGGVLPGIK	File5990 Spectrum99840 scans: 9255
29	Garb_34365	EGGVLPGIK	File5990 Spectrum99849 scans: 9265
29	Garb_34365	EGGVLPGIK	File5990 Spectrum99852 scans: 9268
29	Garb_34365	NAAYIGTPGK	File5990 Spectrum96862 scans: 6079
29	Garb_34365	VAPEVIAEYTVR	File6002 Spectrum386280 scans: 12830
29	Garb_34365	VAPEVIAEYTVR	File6001 Spectrum363484 scans: 13021
29	Garb_34365	VAPEVIAEYTVR	File6001 Spectrum363593 scans: 13138
29	Garb_34365	VAPEVIAEYTVR	File6001 Spectrum363610 scans: 13156
29	Garb_34365	ANSEATLGTYK	File5988 Spectrum50106 scans: 6456
29	Garb_34365	ANSEATLGTYK	File5988 Spectrum50153 scans: 6507
29	Garb_34365	LSSINVENVEDNR	File6001 Spectrum361164 scans: 10547
29	Garb_34365	LSSINVENVEDNR	File6001 Spectrum361060 scans: 10436
29	Garb_34365	LSSINVENVEDNR	File6001 Spectrum361193 scans: 10578
29	Garb_34365	LSSINVENVEDNR	File6002 Spectrum383848 scans: 10236
29	Garb_34365	GILAADESTGTIGK	File5990 Spectrum99585 scans: 8983
29	Garb_34365	GILAADESTGTIGK	File5988 Spectrum52852 scans: 9386
29	Garb_34365	GILAADESTGTIGK	File5989 Spectrum76121 scans: 9303
29	Garb_34365	GILAADESTGTIGK	File5988 Spectrum52715 scans: 9239
29	Garb_34365	GILAADESTGTIGK	File5987 Spectrum29646 scans: 9367
29	Garb_34365	GILAADESTGTIGK	File5988 Spectrum52716 scans: 9240
29	Garb_34365	GILAADESTGTIGK	File5989 Spectrum76146 scans: 9330
29	Garb_34365	GILAADESTGTIGK	File5987 Spectrum29518 scans: 9230
29	Garb_34365	GILAADESTGTIGK	File5987 Spectrum29527 scans: 9240
29	Garb_34365	LSSINVENVEDNRR	File5989 Spectrum76069 scans: 9248
29	Garb_34365	LSSINVENVEDNRR	File5989 Spectrum76043 scans: 9220
29	Garb_34365	LSSINVENVEDNRR	File5988 Spectrum52678 scans: 9200
29	Garb_34365	VAPEVIAEYTVR	File5994 Spectrum198841 scans: 12478
29	Garb_34365	VAPEVIAEYTVR	File5994 Spectrum198899 scans: 12540
29	Garb_34365	TVPAAVPAIVFLSGGQSEEEATLNLNAMNK	File6003 Spectrum413974 scans: 17984
29	Garb_34365	TVPAAVPAIVFLSGGQSEEEATLNLNAMNK	File6002 Spectrum390971 scans: 17834
29	Garb_34365	TVPAAVPAIVFLSGGQSEEEATLNLNAMNK	File6002 Spectrum390956 scans: 17818
29	Garb_34365	TVPAAVPAIVFLSGGQSEEEATLNLNAMNK	File6003 Spectrum413345 scans: 17313
30	Garb_33016	SGAGNIFIK	File5990 Spectrum99742 scans: 9151
30	Garb_33016	SGAGNIFIK	File5990 Spectrum99744 scans: 9153
30	Garb_33016	FQGANLYVK	File5989 Spectrum77035 scans: 10278
30	Garb_33016	FQGANLYVK	File5990 Spectrum100762 scans: 10239
30	Garb_33016	FQGANLYVK	File5989 Spectrum77161 scans: 10413
30	Garb_33016	FQGANLYVK	File5989 Spectrum77032 scans: 10275
30	Garb_33016	GSGFVAFSTPEEASR	File6001 Spectrum360968 scans: 10338
30	Garb_33016	GFGFINFENADDAAR	File6002 Spectrum387618 scans: 14257
30	Garb_33016	GFGFINFENADDAAR	File6001 Spectrum364989 scans: 14627
30	Garb_33016	GFGFINFENADDAAR	File6002 Spectrum387583 scans: 14220
30	Garb_33016	GFGFINFENADDAAR	File6001 Spectrum364907 scans: 14539
30	Garb_33016	GFGFINFENADDAAR	File6001 Spectrum364859 scans: 14488
30	Garb_33016	SLGYGYVNYGNPQDAAR	File5988 Spectrum51658 scans: 8112
30	Garb_33016	SLGYGYVNYGNPQDAAR	File6000 Spectrum337394 scans: 9390
30	Garb_33016	SLGYGYVNYGNPQDAAR	File6000 Spectrum337263 scans: 9250
30	Garb_33016	SLGYGYVNYGNPQDAAR	File6000 Spectrum337370 scans: 9365
30	Garb_33016	SLGYGYVNYGNPQDAAR	File6000 Spectrum337238 scans: 9224
30	Garb_33016	SLGYGYVNYGNPQDAAR	File6001 Spectrum360177 scans: 9494
30	Garb_33016	MVVNKPLYVAQAQR	File5995 Spectrum220831 scans: 10455
30	Garb_33016	GYGFVQFDNEESAQK	File6004 Spectrum429915 scans: 10560
30	Garb_33016	GYGFVQFDNEESAQK	File6005 Spectrum452651 scans: 10419
30	Garb_33016	GYGFVQFDNEESAQK	File6004 Spectrum429920 scans: 10566
30	Garb_33016	GYGFVQFDNEESAQK	File6005 Spectrum452787 scans: 10565
30	Garb_33016	GYGFVQFDNEESAQK	File6005 Spectrum452706 scans: 10478
30	Garb_33016	SLGYGYVNYGNPQDAAR	File5993 Spectrum171877 scans: 8802
30	Garb_33016	SLGYGYVNYGNPQDAAR	File5993 Spectrum172217 scans: 9165
30	Garb_33016	SLGYGYVNYGNPQDAAR	File5992 Spectrum148812 scans: 9194
30	Garb_33016	GYGFVQFDNEESAQK	File5998 Spectrum292246 scans: 10305
30	Garb_33016	GYGFVQFDNEESAQK	File5998 Spectrum292232 scans: 10290
30	Garb_33016	TMLGENLYPLVEQLEPDAAAK	File6002 Spectrum390238 scans: 17052
30	Garb_33016	TMLGENLYPLVEQLEPDAAAK	File6002 Spectrum390142 scans: 16949
30	Garb_33016	TMLGENLYPLVEQLEPDAAAK	File6002 Spectrum390277 scans: 17093
31	cotton_GLEAN_10006221	MMVVLGELGGR	File6003 Spectrum413078 scans: 17029
31	cotton_GLEAN_10006221	MMVVLGELGGR	File6004 Spectrum433859 scans: 14767
31	cotton_GLEAN_10006221	DEYSLVEALK	File6004 Spectrum432195 scans: 12992
31	cotton_GLEAN_10006221	SGGMSNEMYNTIAR	File6001 Spectrum359742 scans: 9030
31	cotton_GLEAN_10006221	SGGMSNEMYNTIAR	File6002 Spectrum382570 scans: 8873
31	cotton_GLEAN_10006221	SGGMSNEMYNTIAR	File6002 Spectrum382439 scans: 8733
31	cotton_GLEAN_10006221	SGGMSNEMYNTIAR	File6002 Spectrum379429 scans: 5522
31	cotton_GLEAN_10006221	SGGMSNEMYNTIAR	File6002 Spectrum380414 scans: 6573
31	cotton_GLEAN_10006221	SGGMSNEMYNTIAR	File6002 Spectrum379419 scans: 5511
31	cotton_GLEAN_10006221	TTQALFYNYK	File5987 Spectrum30909 scans: 10714
31	cotton_GLEAN_10006221	ETFEQLVEEGK	File6005 Spectrum454349 scans: 12231
31	cotton_GLEAN_10006221	VVAIIAEGVPESDTK	File6004 Spectrum434207 scans: 15139
31	cotton_GLEAN_10006221	VVAIIAEGVPESDTK	File6004 Spectrum434239 scans: 15173
31	cotton_GLEAN_10006221	VVAIIAEGVPESDTK	File6005 Spectrum457018 scans: 15078
31	cotton_GLEAN_10006221	VVAIIAEGVPESDTK	File6005 Spectrum457063 scans: 15126
31	cotton_GLEAN_10006221	VVAIIAEGVPESDTK	File6005 Spectrum456938 scans: 14992
31	cotton_GLEAN_10006221	VVAIIAEGVPESDTK	File6004 Spectrum434092 scans: 15016
31	cotton_GLEAN_10006221	VVIGPATVGGIQAGAFK	File5989 Spectrum80523 scans: 13999
31	cotton_GLEAN_10006221	VVIGPATVGGIQAGAFK	File5989 Spectrum80392 scans: 13859
31	cotton_GLEAN_10006221	VVIGPATVGGIQAGAFK	File5989 Spectrum80553 scans: 14031
31	cotton_GLEAN_10006221	VVIGPATVGGIQAGAFK	File5989 Spectrum80423 scans: 13892
31	cotton_GLEAN_10006221	ETPSVAGIINPGAEGFQK	File6005 Spectrum454343 scans: 12224
31	cotton_GLEAN_10006221	ETPSVAGIINPGAEGFQK	File6005 Spectrum454364 scans: 12247
31	cotton_GLEAN_10006221	VTDGIYEGIAIGGDVFPGSTLSDHILR	File6003 Spectrum413387 scans: 17358
32	Garb_10818	GWNAQVEDR	File6005 Spectrum448066 scans: 5529
32	Garb_10818	GWNAQVEDR	File6004 Spectrum425046 scans: 5367
32	Garb_10818	GWNAQVEDR	File6004 Spectrum425003 scans: 5321
32	Garb_10818	GWNAQVEDR	File6004 Spectrum425099 scans: 5423
32	Garb_10818	ETFNQMLLHR	File5990 Spectrum100953 scans: 10443
32	Garb_10818	ETFNQMLLHR	File5990 Spectrum100815 scans: 10295
32	Garb_10818	ETFNQMLLHR	File5990 Spectrum100822 scans: 10303
32	Garb_10818	ETFNQMLLHR	File5991 Spectrum126623 scans: 11960
32	Garb_10818	ETFNQMLLHR	File5990 Spectrum98433 scans: 7755
32	Garb_10818	ETFNQMLLHR	File5991 Spectrum124121 scans: 9291
32	Garb_10818	ETFNQMLLHR	File5990 Spectrum98365 scans: 7682
32	Garb_10818	ETFNQMLLHR	File5990 Spectrum98345 scans: 7661
32	Garb_10818	GFYTYDAFIAAAR	File6001 Spectrum365383 scans: 15047
32	Garb_10818	SFPAFATTGDQATR	File6002 Spectrum383759 scans: 10141
32	Garb_10818	SFPAFATTGDQATR	File6002 Spectrum383336 scans: 9690
32	Garb_10818	SFPAFATTGDQATR	File6002 Spectrum383386 scans: 9743
32	Garb_10818	SFPAFATTGDQATR	File6001 Spectrum360563 scans: 9906
32	Garb_10818	SFPAFATTGDQATR	File6001 Spectrum360607 scans: 9952
32	Garb_10818	SFPAFATTGDQATR	File6002 Spectrum383244 scans: 9591
32	Garb_10818	SFPAFATTGDQATR	File6002 Spectrum383206 scans: 9551
32	Garb_10818	SFPAFATTGDQATR	File6002 Spectrum383305 scans: 9657
32	Garb_10818	SFPAFATTGDQATR	File6003 Spectrum406184 scans: 9675
32	Garb_10818	SFPAFATTGDQATR	File6001 Spectrum360433 scans: 9767
32	Garb_10818	SFPAFATTGDQATR	File6001 Spectrum360574 scans: 9917
32	Garb_10818	SFPAFATTGDQATR	File6002 Spectrum383470 scans: 9833
32	Garb_10818	SFPAFATTGDQATR	File6002 Spectrum383605 scans: 9977
32	Garb_10818	GPMQLSWNYNYGQCGR	File6003 Spectrum408551 scans: 12200
32	Garb_10818	AIGVDLLNNPDLLSSDPTISFK	File6003 Spectrum413316 scans: 17282
32	Garb_10818	AIGVDLLNNPDLLSSDPTISFK	File6003 Spectrum413440 scans: 17415
32	Garb_10818	AIGVDLLNNPDLLSSDPTISFK	File6003 Spectrum413344 scans: 17312
32	Garb_10818	AIGVDLLNNPDLLSSDPTISFK	File6003 Spectrum413439 scans: 17414
32	Garb_10818	AIGVDLLNNPDLLSSDPTISFK	File6003 Spectrum413314 scans: 17280
32	Garb_10818	AIGVDLLNNPDLLSSDPTISFK	File6003 Spectrum413334 scans: 17302
33	Garb_29164	DAGIIAGLNVAR	File6002 Spectrum384939 scans: 11399
33	Garb_29164	DAGIIAGLNVAR	File6002 Spectrum385017 scans: 11483
33	Garb_29164	DAGIIAGLNVAR	File6003 Spectrum408030 scans: 11644
33	Garb_29164	FDLTGIPPAPR	File6004 Spectrum431132 scans: 11859
33	Garb_29164	FDLTGIPPAPR	File6004 Spectrum431403 scans: 12148
33	Garb_29164	FDLTGIPPAPR	File6004 Spectrum431672 scans: 12435
33	Garb_29164	FDLTGIPPAPR	File6004 Spectrum431268 scans: 12004
33	Garb_29164	ETAEAFLGK	File5987 Spectrum30069 scans: 9818
33	Garb_29164	ETAEAFLGK	File5987 Spectrum30201 scans: 9959
33	Garb_29164	FEELNNDLFR	File6001 Spectrum365511 scans: 15183
33	Garb_29164	FEELNNDLFR	File6001 Spectrum365418 scans: 15084
33	Garb_29164	SQIDEIVLVGGSTR	File6001 Spectrum362607 scans: 12086
33	Garb_29164	SQIDEIVLVGGSTR	File6000 Spectrum339602 scans: 11745
33	Garb_29164	SQIDEIVLVGGSTR	File6001 Spectrum362692 scans: 12176
33	Garb_29164	SQIDEIVLVGGSTR	File6001 Spectrum362739 scans: 12227
33	Garb_29164	SQIDEIVLVGGSTR	File6000 Spectrum339619 scans: 11763
33	Garb_29164	SQIDEIVLVGGSTR	File6001 Spectrum362675 scans: 12158
33	Garb_29164	SQIDEIVLVGGSTR	File6000 Spectrum339726 scans: 11878
33	Garb_29164	ITPSWVAFTDSER	File6002 Spectrum387220 scans: 13833
33	Garb_29164	DAVVTVPAYFNDAQR	File5999 Spectrum317143 scans: 11816
33	Garb_29164	DAVVTVPAYFNDAQR	File6000 Spectrum339525 scans: 11663
33	Garb_29164	DAVVTVPAYFNDAQR	File5999 Spectrum317247 scans: 11927
33	Garb_29164	DAVVTVPAYFNDAQR	File6000 Spectrum339659 scans: 11806
33	Garb_29164	VFSPEEISAMVLTK	File6004 Spectrum436257 scans: 17325
33	Garb_29164	VFSPEEISAMVLTK	File6005 Spectrum459088 scans: 17286
33	Garb_29164	VFSPEEISAMVLTK	File6005 Spectrum458908 scans: 17094
33	Garb_29164	VFSPEEISAMVLTK	File6005 Spectrum458975 scans: 17165
33	Garb_29164	VFSPEEISAMVLTK	File6004 Spectrum436224 scans: 17290
33	Garb_29164	VFSPEEISAMVLTK	File6005 Spectrum456800 scans: 14845
33	Garb_29164	SGGAPGGGSTEEDDDSHDEL	File5999 Spectrum310405 scans: 4626
33	Garb_29164	SGGAPGGGSTEEDDDSHDEL	File6000 Spectrum332724 scans: 4409
33	Garb_29164	EALEWLDDNQSAEK	File6004 Spectrum431852 scans: 12627
33	Garb_29164	EALEWLDDNQSAEK	File6004 Spectrum431759 scans: 12527
33	Garb_29164	IINEPTAAAIAYGLDK	File6005 Spectrum456465 scans: 14488
33	Garb_29164	IINEPTAAAIAYGLDK	File6004 Spectrum433653 scans: 14548
33	Garb_29164	IINEPTAAAIAYGLDK	File6004 Spectrum433525 scans: 14411
33	Garb_29164	IINEPTAAAIAYGLDK	File6004 Spectrum433536 scans: 14423
33	Garb_29164	VEIESLFDGVDFSEPLTR	File5999 Spectrum322832 scans: 17884
33	Garb_29164	VEIESLFDGVDFSEPLTR	File5997 Spectrum275927 scans: 17537
33	Garb_29164	VEIESLFDGVDFSEPLTR	File5999 Spectrum322831 scans: 17883
33	Garb_29164	VEIESLFDGVDFSEPLTR	File5997 Spectrum275942 scans: 17553
33	Garb_29164	IKDAVVTVPAYFNDAQR	File5993 Spectrum176522 scans: 13757
33	Garb_29164	SQVFTTYQDQQTTVSIQVFEGER	File5997 Spectrum272161 scans: 13520
33	Garb_29164	SQVFTTYQDQQTTVSIQVFEGER	File5999 Spectrum319057 scans: 13857
33	Garb_29164	GVNPDEAVAYGAAVQGGILSGEGGDETK	File6002 Spectrum386874 scans: 13463
33	Garb_29164	SQVFTTYQDQQTTVSIQVFEGER	File5991 Spectrum129042 scans: 14540
34	cotton_GLEAN_10026382	DLEEVVQR	File6001 Spectrum359059 scans: 8301
34	cotton_GLEAN_10026382	IVLALAAK	File5990 Spectrum104928 scans: 14683
34	cotton_GLEAN_10026382	IVLALAAK	File5990 Spectrum104925 scans: 14679
34	cotton_GLEAN_10026382	IVLALAAK	File5990 Spectrum104788 scans: 14533
34	cotton_GLEAN_10026382	IVLALAAK	File5990 Spectrum104775 scans: 14519
34	cotton_GLEAN_10026382	IVLALAAK	File5991 Spectrum130323 scans: 15907
34	cotton_GLEAN_10026382	FADLLEK	File5989 Spectrum80843 scans: 14340
34	cotton_GLEAN_10026382	YYAGWADK	File5988 Spectrum52802 scans: 9332
34	cotton_GLEAN_10026382	AFDEGPWPK	File5989 Spectrum77436 scans: 10706
34	cotton_GLEAN_10026382	AFDEGPWPK	File5990 Spectrum101028 scans: 10523
34	cotton_GLEAN_10026382	AFDEGPWPK	File5990 Spectrum101165 scans: 10669
34	cotton_GLEAN_10026382	AFDEGPWPK	File5991 Spectrum126770 scans: 12117
34	cotton_GLEAN_10026382	LSFTGSTATGK	File5989 Spectrum75313 scans: 8441
34	cotton_GLEAN_10026382	DEIFGPVQSISK	File6005 Spectrum453995 scans: 11853
34	cotton_GLEAN_10026382	DEIFGPVQSISK	File6005 Spectrum454109 scans: 11975
34	cotton_GLEAN_10026382	DEIFGPVQSISK	File6005 Spectrum453973 scans: 11830
34	cotton_GLEAN_10026382	DEIFGPVQSISK	File5987 Spectrum32273 scans: 12169
34	cotton_GLEAN_10026382	GIYGLSSYLQVK	File5987 Spectrum34629 scans: 14682
34	cotton_GLEAN_10026382	GIYGLSSYLQVK	File6005 Spectrum456513 scans: 14539
34	cotton_GLEAN_10026382	TAEQTPLSAIYVSK	File6005 Spectrum453791 scans: 11635
34	cotton_GLEAN_10026382	TGIEQGPQIDNEQFK	File6005 Spectrum450766 scans: 8409
34	cotton_GLEAN_10026382	TGIEQGPQIDNEQFK	File6005 Spectrum450753 scans: 8395
34	cotton_GLEAN_10026382	TGIEQGPQIDNEQFK	File5987 Spectrum28892 scans: 8562
34	cotton_GLEAN_10026382	TGIEQGPQIDNEQFK	File5987 Spectrum28923 scans: 8595
34	cotton_GLEAN_10026382	SGIESGATLESGGEQFGSK	File6004 Spectrum427830 scans: 8336
34	cotton_GLEAN_10026382	SGIESGATLESGGEQFGSK	File6005 Spectrum450756 scans: 8398
34	cotton_GLEAN_10026382	SGIESGATLESGGEQFGSK	File6005 Spectrum450765 scans: 8408
34	cotton_GLEAN_10026382	SGIESGATLESGGEQFGSK	File6004 Spectrum427869 scans: 8378
34	cotton_GLEAN_10026382	SGIESGATLESGGEQFGSK	File6004 Spectrum427835 scans: 8342
34	cotton_GLEAN_10026382	ANASSYGLAAGVFTQNIETANTLTR	File6000 Spectrum342602 scans: 14945
34	cotton_GLEAN_10026382	ANASSYGLAAGVFTQNIETANTLTR	File6000 Spectrum342573 scans: 14914
34	cotton_GLEAN_10026382	ANASSYGLAAGVFTQNIETANTLTR	File5999 Spectrum319911 scans: 14768
34	cotton_GLEAN_10026382	GYYIQPTVFSNVQDDMLIAK	File6002 Spectrum389169 scans: 15911
34	cotton_GLEAN_10026382	ANASSYGLAAGVFTQNIETANTLTR	File5992 Spectrum153310 scans: 13991
35	cotton_GLEAN_10018512	LGLQVIAK	File5990 Spectrum101862 scans: 11412
35	cotton_GLEAN_10018512	LLDLNPEK	File5988 Spectrum55278 scans: 11973
35	cotton_GLEAN_10018512	LLDLNPEK	File5988 Spectrum55402 scans: 12106
35	cotton_GLEAN_10018512	LGSIAIEAALK	File5988 Spectrum57789 scans: 14652
35	cotton_GLEAN_10018512	LGSIAIEAALK	File5988 Spectrum57849 scans: 14716
35	cotton_GLEAN_10018512	EEQDNFAVQSFER	File6000 Spectrum337670 scans: 9685
35	cotton_GLEAN_10018512	EEQDNFAVQSFER	File6001 Spectrum360323 scans: 9650
35	cotton_GLEAN_10018512	EEQDNFAVQSFER	File6000 Spectrum337640 scans: 9653
35	cotton_GLEAN_10018512	EEQDNFAVQSFER	File6000 Spectrum337546 scans: 9552
35	cotton_GLEAN_10018512	EEQDNFAVQSFER	File6000 Spectrum337511 scans: 9515
35	cotton_GLEAN_10018512	TPMGGFLGSLSSLSATK	File5988 Spectrum59308 scans: 16272
35	cotton_GLEAN_10018512	TPMGGFLGSLSSLSATK	File5988 Spectrum57264 scans: 14092
35	cotton_GLEAN_10018512	GIAAQQGGAFAWEIAPVEVPGGR	File6001 Spectrum365738 scans: 15426
35	cotton_GLEAN_10018512	GIAAQQGGAFAWEIAPVEVPGGR	File6002 Spectrum388262 scans: 14944
35	cotton_GLEAN_10018512	GIAAQQGGAFAWEIAPVEVPGGR	File6001 Spectrum365709 scans: 15395
35	cotton_GLEAN_10018512	GIAAQQGGAFAWEIAPVEVPGGR	File6001 Spectrum365602 scans: 15280
35	cotton_GLEAN_10018512	GIAAQQGGAFAWEIAPVEVPGGR	File6002 Spectrum388273 scans: 14956
35	cotton_GLEAN_10018512	GIAAQQGGAFAWEIAPVEVPGGR	File6001 Spectrum365585 scans: 15262
35	cotton_GLEAN_10018512	IAGYADAAQAPEFFTTAPALAIPK	File6003 Spectrum413005 scans: 16951
35	cotton_GLEAN_10018512	IAGYADAAQAPEFFTTAPALAIPK	File6003 Spectrum413004 scans: 16950
35	cotton_GLEAN_10018512	IAGYADAAQAPEFFTTAPALAIPK	File6003 Spectrum413045 scans: 16993
35	cotton_GLEAN_10018512	AISNAGLDASQVDYYEINEAFAVVALANQK	File6001 Spectrum369220 scans: 19140
36	cotton_GLEAN_10008387	YSNMEFFGQIDNR	File6000 Spectrum340695 scans: 12911
36	cotton_GLEAN_10008387	YSNMEFFGQIDNR	File6001 Spectrum363860 scans: 13422
36	cotton_GLEAN_10008387	YSNMEFFGQIDNR	File6000 Spectrum340776 scans: 12998
36	cotton_GLEAN_10008387	YSNMEFFGQIDNR	File6001 Spectrum363839 scans: 13400
36	cotton_GLEAN_10008387	YSNMEFFGQIDNR	File6000 Spectrum340648 scans: 12861
36	cotton_GLEAN_10008387	YSNMEFFGQIDNR	File6001 Spectrum361624 scans: 11037
36	cotton_GLEAN_10008387	YSNMEFFGQIDNR	File6001 Spectrum361605 scans: 11017
36	cotton_GLEAN_10008387	YSNMEFFGQIDNR	File6000 Spectrum338476 scans: 10544
36	cotton_GLEAN_10008387	ELTGYLSIQAPPK	File5987 Spectrum32656 scans: 12577
36	cotton_GLEAN_10008387	ELTGYLSIQAPPK	File6005 Spectrum454596 scans: 12494
36	cotton_GLEAN_10008387	ELTGYLSIQAPPK	File6005 Spectrum454724 scans: 12631
36	cotton_GLEAN_10008387	ELTGYLSIQAPPK	File6005 Spectrum454770 scans: 12680
36	cotton_GLEAN_10008387	ELTGYLSIQAPPK	File5987 Spectrum32659 scans: 12581
36	cotton_GLEAN_10008387	ELTGYLSIQAPPK	File5987 Spectrum32796 scans: 12727
36	cotton_GLEAN_10008387	ELTGYLSIQAPPK	File6005 Spectrum454615 scans: 12514
36	cotton_GLEAN_10008387	MYAVGETELYGSNK	File6005 Spectrum453034 scans: 10828
36	cotton_GLEAN_10008387	MYAVGETELYGSNK	File6005 Spectrum453124 scans: 10924
36	cotton_GLEAN_10008387	MYAVGETELYGSNK	File6004 Spectrum430130 scans: 10790
36	cotton_GLEAN_10008387	MYAVGETELYGSNK	File6005 Spectrum453130 scans: 10930
36	cotton_GLEAN_10008387	MYAVGETELYGSNK	File6004 Spectrum430155 scans: 10816
36	cotton_GLEAN_10008387	MYAVGETELYGSNK	File5987 Spectrum28908 scans: 8579
36	cotton_GLEAN_10008387	MYAVGETELYGSNK	File6004 Spectrum427902 scans: 8413
36	cotton_GLEAN_10008387	MYAVGETELYGSNK	File6004 Spectrum427891 scans: 8401
36	cotton_GLEAN_10008387	MYAVGETELYGSNK	File6004 Spectrum427895 scans: 8406
36	cotton_GLEAN_10008387	MYAVGETELYGSNK	File6005 Spectrum450776 scans: 8419
36	cotton_GLEAN_10008387	ELLSELANQAYSNPK	File6005 Spectrum455570 scans: 13533
36	cotton_GLEAN_10008387	ELLSELANQAYSNPK	File6005 Spectrum455708 scans: 13680
36	cotton_GLEAN_10008387	ELLSELANQAYSNPK	File6005 Spectrum455744 scans: 13719
36	cotton_GLEAN_10008387	ELLSELANQAYSNPK	File5987 Spectrum33849 scans: 13850
36	cotton_GLEAN_10008387	ELLSELANQAYSNPK	File6005 Spectrum455606 scans: 13571
36	cotton_GLEAN_10008387	MYAVGETELYGSNK	File5998 Spectrum292447 scans: 10519
37	Garb_11569	GYSFTTTAER	File6001 Spectrum357597 scans: 6742
37	Garb_11569	GYSFTTTAER	File6002 Spectrum380209 scans: 6354
37	Garb_11569	GYSFTTTAER	File6002 Spectrum380318 scans: 6470
37	Garb_11569	GYSFTTTAER	File6002 Spectrum380319 scans: 6471
37	Garb_11569	DLTDSLMK	File5988 Spectrum52995 scans: 9538
37	Garb_11569	DLTDSLMK	File5987 Spectrum29748 scans: 9475
37	Garb_11569	DLTDSLMK	File5987 Spectrum29765 scans: 9494
37	Garb_11569	DLTDSLMK	File5987 Spectrum28118 scans: 7737
37	Garb_11569	GEYDESGPAIVHR	File5989 Spectrum72261 scans: 5186
37	Garb_11569	GEYDESGPAIVHR	File5988 Spectrum49093 scans: 5376
37	Garb_11569	GEYDESGPAIVHR	File5989 Spectrum72300 scans: 5227
37	Garb_11569	EITALAPSSMK	File5987 Spectrum30335 scans: 10102
37	Garb_11569	EITALAPSSMK	File5987 Spectrum30456 scans: 10231
37	Garb_11569	EITALAPSSMK	File5987 Spectrum30325 scans: 10091
37	Garb_11569	EITALAPSSMK	File5987 Spectrum28670 scans: 8326
37	Garb_11569	EITALAPSSMK	File5987 Spectrum28551 scans: 8199
37	Garb_11569	DAYVGDEAQSK	File6005 Spectrum447520 scans: 4946
37	Garb_11569	DAYVGDEAQSK	File6005 Spectrum447490 scans: 4914
37	Garb_11569	SYELPDGQVITIGAER	File5999 Spectrum318254 scans: 13001
37	Garb_11569	SYELPDGQVITIGAER	File5999 Spectrum318267 scans: 13015
37	Garb_11569	IWHHTFYNELR	File5998 Spectrum291404 scans: 9407
37	Garb_11569	SYELPDGQVITIGAER	File5992 Spectrum151523 scans: 12085
37	Garb_11569	SYELPDGQVITIGAER	File5991 Spectrum128050 scans: 13482
37	Garb_11569	DLYGNIVLSGGSTMFPGIADR	File5999 Spectrum320954 scans: 15881
37	Garb_11569	DLYGNIVLSGGSTMFPGIADR	File5999 Spectrum320838 scans: 15757
37	Garb_11569	DLYGNIVLSGGSTMFPGIADR	File5999 Spectrum320820 scans: 15738
37	Garb_11569	YPIEHGIVSNWDDMEK	File5991 Spectrum128537 scans: 14002
37	Garb_11569	YPIEHGIVSNWDDMEK	File5991 Spectrum128404 scans: 13860
37	Garb_11569	YPIEHGIVSNWDDMEK	File5991 Spectrum128494 scans: 13956
37	Garb_11569	YPIEHGIVSNWDDMEK	File5991 Spectrum127263 scans: 12643
37	Garb_11569	YPIEHGIVSNWDDMEK	File5991 Spectrum127260 scans: 12639
37	Garb_11569	YPIEHGIVSNWDDMEK	File5991 Spectrum127259 scans: 12638
37	Garb_11569	YPIEHGIVSNWDDMEK	File5991 Spectrum127230 scans: 12607
37	Garb_11569	VAPEEHPVLLTEAPLNPK	File5992 Spectrum150943 scans: 11467
37	Garb_11569	VAPEEHPVLLTEAPLNPK	File5993 Spectrum174497 scans: 11597
37	Garb_11569	VAPEEHPVLLTEAPLNPK	File5992 Spectrum150813 scans: 11328
37	Garb_11569	VAPEEHPVLLTEAPLNPK	File5993 Spectrum174363 scans: 11454
37	Garb_11569	VAPEEHPVLLTEAPLNPK	File5992 Spectrum150809 scans: 11324
37	Garb_11569	KDLYGNIVLSGGSTMFPGIADR	File5992 Spectrum154480 scans: 15239
37	Garb_42432	GYSFTTTAER	File6001 Spectrum357597 scans: 6742
37	Garb_42432	GYSFTTTAER	File6002 Spectrum380209 scans: 6354
37	Garb_42432	GYSFTTTAER	File6002 Spectrum380318 scans: 6470
37	Garb_42432	GYSFTTTAER	File6002 Spectrum380319 scans: 6471
37	Garb_42432	DLTDSLMK	File5988 Spectrum52995 scans: 9538
37	Garb_42432	DLTDSLMK	File5987 Spectrum29748 scans: 9475
37	Garb_42432	DLTDSLMK	File5987 Spectrum29765 scans: 9494
37	Garb_42432	DLTDSLMK	File5987 Spectrum28118 scans: 7737
37	Garb_42432	GEYDESGPAIVHR	File5989 Spectrum72261 scans: 5186
37	Garb_42432	GEYDESGPAIVHR	File5988 Spectrum49093 scans: 5376
37	Garb_42432	GEYDESGPAIVHR	File5989 Spectrum72300 scans: 5227
37	Garb_42432	EITALAPSSMK	File5987 Spectrum30335 scans: 10102
37	Garb_42432	EITALAPSSMK	File5987 Spectrum30456 scans: 10231
37	Garb_42432	EITALAPSSMK	File5987 Spectrum30325 scans: 10091
37	Garb_42432	EITALAPSSMK	File5987 Spectrum28670 scans: 8326
37	Garb_42432	EITALAPSSMK	File5987 Spectrum28551 scans: 8199
37	Garb_42432	DAYVGDEAQSK	File6005 Spectrum447520 scans: 4946
37	Garb_42432	DAYVGDEAQSK	File6005 Spectrum447490 scans: 4914
37	Garb_42432	SYELPDGQVITIGAER	File5999 Spectrum318254 scans: 13001
37	Garb_42432	SYELPDGQVITIGAER	File5999 Spectrum318267 scans: 13015
37	Garb_42432	IWHHTFYNELR	File5998 Spectrum291404 scans: 9407
37	Garb_42432	SYELPDGQVITIGAER	File5992 Spectrum151523 scans: 12085
37	Garb_42432	SYELPDGQVITIGAER	File5991 Spectrum128050 scans: 13482
37	Garb_42432	DLYGNIVLSGGSTMFPGIADR	File5999 Spectrum320954 scans: 15881
37	Garb_42432	DLYGNIVLSGGSTMFPGIADR	File5999 Spectrum320838 scans: 15757
37	Garb_42432	DLYGNIVLSGGSTMFPGIADR	File5999 Spectrum320820 scans: 15738
37	Garb_42432	YPIEHGIVSNWDDMEK	File5991 Spectrum128537 scans: 14002
37	Garb_42432	YPIEHGIVSNWDDMEK	File5991 Spectrum128404 scans: 13860
37	Garb_42432	YPIEHGIVSNWDDMEK	File5991 Spectrum128494 scans: 13956
37	Garb_42432	YPIEHGIVSNWDDMEK	File5991 Spectrum127263 scans: 12643
37	Garb_42432	YPIEHGIVSNWDDMEK	File5991 Spectrum127260 scans: 12639
37	Garb_42432	YPIEHGIVSNWDDMEK	File5991 Spectrum127259 scans: 12638
37	Garb_42432	YPIEHGIVSNWDDMEK	File5991 Spectrum127230 scans: 12607
37	Garb_42432	VAPEEHPVLLTEAPLNPK	File5992 Spectrum150943 scans: 11467
37	Garb_42432	VAPEEHPVLLTEAPLNPK	File5993 Spectrum174497 scans: 11597
37	Garb_42432	VAPEEHPVLLTEAPLNPK	File5992 Spectrum150813 scans: 11328
37	Garb_42432	VAPEEHPVLLTEAPLNPK	File5993 Spectrum174363 scans: 11454
37	Garb_42432	VAPEEHPVLLTEAPLNPK	File5992 Spectrum150809 scans: 11324
37	Garb_42432	KDLYGNIVLSGGSTMFPGIADR	File5992 Spectrum154480 scans: 15239
38	Garb_25176	LGSIAIEAALK	File5988 Spectrum57789 scans: 14652
38	Garb_25176	LGSIAIEAALK	File5988 Spectrum57849 scans: 14716
38	Garb_25176	ALELGLQVIAK	File5987 Spectrum35732 scans: 15858
38	Garb_25176	ALELGLQVIAK	File5987 Spectrum35702 scans: 15826
38	Garb_25176	ALELGLQVIAK	File5987 Spectrum35826 scans: 15959
38	Garb_25176	EEQDNFAVQSFER	File6000 Spectrum337670 scans: 9685
38	Garb_25176	EEQDNFAVQSFER	File6001 Spectrum360323 scans: 9650
38	Garb_25176	EEQDNFAVQSFER	File6000 Spectrum337640 scans: 9653
38	Garb_25176	EEQDNFAVQSFER	File6000 Spectrum337546 scans: 9552
38	Garb_25176	EEQDNFAVQSFER	File6000 Spectrum337511 scans: 9515
38	Garb_25176	TPMGGFLGSLSSLSATK	File5988 Spectrum59308 scans: 16272
38	Garb_25176	TPMGGFLGSLSSLSATK	File5988 Spectrum57264 scans: 14092
38	Garb_25176	GIAAQQGGAFAWEIVPVEVPGGR	File6001 Spectrum366608 scans: 16354
38	Garb_25176	GIAAQQGGAFAWEIVPVEVPGGR	File6001 Spectrum366506 scans: 16245
38	Garb_25176	GIAAQQGGAFAWEIVPVEVPGGR	File6001 Spectrum366483 scans: 16220
38	Garb_25176	GIAAQQGGAFAWEIVPVEVPGGR	File6002 Spectrum389177 scans: 15920
38	Garb_25176	IAGYADAAQAPEFFTTAPALAIPK	File6003 Spectrum413005 scans: 16951
38	Garb_25176	IAGYADAAQAPEFFTTAPALAIPK	File6003 Spectrum413004 scans: 16950
38	Garb_25176	IAGYADAAQAPEFFTTAPALAIPK	File6003 Spectrum413045 scans: 16993
38	Garb_25176	ANVDPSLVQEVFFGNVLSANLGQAPAR	File5999 Spectrum323470 scans: 18564
38	Garb_25176	ANVDPSLVQEVFFGNVLSANLGQAPAR	File5999 Spectrum323513 scans: 18610
38	Garb_25176	ANVDPSLVQEVFFGNVLSANLGQAPAR	File5999 Spectrum323562 scans: 18663
38	Garb_25176	AISNAGLDASQVDYYEINEAFAVVALANQK	File6001 Spectrum369220 scans: 19140
39	Garb_02338	FVTQGAYDTR	File6002 Spectrum381160 scans: 7369
39	Garb_02338	TVSGVAGPLVILDK	File5987 Spectrum34428 scans: 14467
39	Garb_02338	TVSGVAGPLVILDK	File5987 Spectrum34379 scans: 14415
39	Garb_02338	TVSGVAGPLVILDK	File5987 Spectrum34506 scans: 14551
39	Garb_02338	TVSGVAGPLVILDK	File6005 Spectrum456433 scans: 14454
39	Garb_02338	TVSGVAGPLVILDK	File6005 Spectrum456434 scans: 14455
39	Garb_02338	TVSGVAGPLVILDK	File5987 Spectrum34549 scans: 14597
39	Garb_02338	TVSGVAGPLVILDK	File6005 Spectrum456429 scans: 14449
39	Garb_02338	TVSGVAGPLVILDK	File6005 Spectrum456430 scans: 14450
39	Garb_02338	TVSGVAGPLVILDK	File5987 Spectrum34503 scans: 14547
39	Garb_02338	TVSGVAGPLVILDK	File6005 Spectrum456463 scans: 14486
39	Garb_02338	YTTVQFTGEVLK	File6004 Spectrum431040 scans: 11760
39	Garb_02338	YTTVQFTGEVLK	File6004 Spectrum431032 scans: 11752
39	Garb_02338	YTTVQFTGEVLK	File6004 Spectrum431162 scans: 11891
39	Garb_02338	YTTVQFTGEVLK	File6005 Spectrum454005 scans: 11864
39	Garb_02338	VTLFLNLANDPTIER	File6001 Spectrum368247 scans: 18102
39	Garb_02338	AVVQVFEGTSGIDNK	File6005 Spectrum454992 scans: 12917
39	Garb_02338	AVVQVFEGTSGIDNK	File6005 Spectrum454856 scans: 12771
39	Garb_02338	AVVQVFEGTSGIDNK	File5987 Spectrum32856 scans: 12791
39	Garb_02338	AVVQVFEGTSGIDNK	File5987 Spectrum32990 scans: 12934
39	Garb_02338	AVVQVFEGTSGIDNK	File5987 Spectrum32884 scans: 12821
39	Garb_02338	AVVQVFEGTSGIDNK	File5987 Spectrum33020 scans: 12966
39	Garb_02338	AVVQVFEGTSGIDNK	File6005 Spectrum454904 scans: 12823
39	Garb_02338	GYPGYMYTDLATIYER	File5999 Spectrum319928 scans: 14786
39	Garb_02338	NFIDMEEGTLEIGMEYR	File5999 Spectrum320900 scans: 15823
39	Garb_02338	NFIDMEEGTLEIGMEYR	File5999 Spectrum320897 scans: 15820
39	Garb_02338	DHADVSNQLYANYAIGK	File5991 Spectrum125716 scans: 10993
39	Garb_02338	TYPEEMIQTGISTIDVMNSIAR	File5997 Spectrum273654 scans: 15113
39	Garb_26199	FVTQGAYDTR	File6002 Spectrum381160 scans: 7369
39	Garb_26199	TVSGVAGPLVILDK	File5987 Spectrum34428 scans: 14467
39	Garb_26199	TVSGVAGPLVILDK	File5987 Spectrum34379 scans: 14415
39	Garb_26199	TVSGVAGPLVILDK	File5987 Spectrum34506 scans: 14551
39	Garb_26199	TVSGVAGPLVILDK	File6005 Spectrum456433 scans: 14454
39	Garb_26199	TVSGVAGPLVILDK	File6005 Spectrum456434 scans: 14455
39	Garb_26199	TVSGVAGPLVILDK	File5987 Spectrum34549 scans: 14597
39	Garb_26199	TVSGVAGPLVILDK	File6005 Spectrum456429 scans: 14449
39	Garb_26199	TVSGVAGPLVILDK	File6005 Spectrum456430 scans: 14450
39	Garb_26199	TVSGVAGPLVILDK	File5987 Spectrum34503 scans: 14547
39	Garb_26199	TVSGVAGPLVILDK	File6005 Spectrum456463 scans: 14486
39	Garb_26199	YTTVQFTGEVLK	File6004 Spectrum431040 scans: 11760
39	Garb_26199	YTTVQFTGEVLK	File6004 Spectrum431032 scans: 11752
39	Garb_26199	YTTVQFTGEVLK	File6004 Spectrum431162 scans: 11891
39	Garb_26199	YTTVQFTGEVLK	File6005 Spectrum454005 scans: 11864
[truncated: 9,375 more rows]
